# Supplementary material for: Elaborate plumage patterning in a Cretaceous bird
Source: PeerJ. 2018 Nov 2;6:e5831. doi: 10.7717/peerj.5831 (PMC6216952; doi:10.7717/peerj.5831)
Supplement: Supplemental Information 3 — Each column is a Tof-SIMS reading from an extant or fossil melanin sample. [file peerj-06-5831-s003.xlsx]

## Sheet: Sheet1
K1			Chicken			Turkey			Crow			O			P			Y			Rock
Channel	Mass (u)	Intensity	Channel	Mass (u)	Intensity	Channel	Mass (u)	Intensity	Channel	Mass (u)	Intensity	Channel	Mass (u)	Intensity	Channel	Mass (u)	Intensity	Channel	Mass (u)	Intensity	Channel	Mass (u)	Intensity
2	0.000408	0	2	0.000373	0	2	0.000357	0	2	0.000492	0	2	0.000352	0	2	0.000346	0	2	0.000383	0	2	0.000343	0
7	0.000414	0	7	0.000379	0	7	0.000363	0	7	0.000499	0	7	0.000357	0	7	0.000352	0	7	0.000389	0	7	0.000349	0
12	0.00042	0	12	0.000384	0	12	0.000368	0	12	0.000505	0	12	0.000363	0	12	0.000357	0	12	0.000395	0	12	0.000354	0
17	0.000426	0	17	0.00039	0	17	0.000374	0	17	0.000512	0	17	0.000369	0	17	0.000363	0	17	0.000401	0	17	0.00036	0
22	0.000432	0	22	0.000396	0	22	0.00038	0	22	0.000519	0	22	0.000374	0	22	0.000369	0	22	0.000407	0	22	0.000366	0
27	0.000438	0	27	0.000402	0	27	0.000386	0	27	0.000525	0	27	0.00038	0	27	0.000375	0	27	0.000413	0	27	0.000371	0
32	0.000444	0	32	0.000408	0	32	0.000391	0	32	0.000532	0	32	0.000386	0	32	0.00038	0	32	0.000419	0	32	0.000377	0
37	0.00045	0	37	0.000414	0	37	0.000397	0	37	0.000539	0	37	0.000392	0	37	0.000386	0	37	0.000425	0	37	0.000383	0
42	0.000456	0	42	0.000421	0	42	0.000403	0	42	0.000546	0	42	0.000398	0	42	0.000392	0	42	0.000431	0	42	0.000389	0
47	0.000463	0	47	0.000427	0	47	0.000409	0	47	0.000553	0	47	0.000404	0	47	0.000398	0	47	0.000437	0	47	0.000394	0
52	0.000469	0	52	0.000433	0	52	0.000415	0	52	0.00056	0	52	0.00041	0	52	0.000404	0	52	0.000444	0	52	0.0004	0
57	0.000475	0	57	0.000439	0	57	0.000422	0	57	0.000567	0	57	0.000416	0	57	0.00041	0	57	0.00045	0	57	0.000406	0
62	0.000482	0	62	0.000445	0	62	0.000428	0	62	0.000574	0	62	0.000422	0	62	0.000416	0	62	0.000456	0	62	0.000412	0
67	0.000488	0	67	0.000452	0	67	0.000434	0	67	0.000581	0	67	0.000428	0	67	0.000422	0	67	0.000463	0	67	0.000418	0
72	0.000495	0	72	0.000458	0	72	0.00044	0	72	0.000588	0	72	0.000434	0	72	0.000428	0	72	0.000469	0	72	0.000424	0
77	0.000501	0	77	0.000465	0	77	0.000446	0	77	0.000595	0	77	0.00044	0	77	0.000434	0	77	0.000475	0	77	0.00043	0
82	0.000508	0	82	0.000471	0	82	0.000453	0	82	0.000603	0	82	0.000447	0	82	0.00044	0	82	0.000482	0	82	0.000436	0
87	0.000515	0	87	0.000478	0	87	0.000459	0	87	0.00061	0	87	0.000453	0	87	0.000447	0	87	0.000489	0	87	0.000442	0
92	0.000521	0	92	0.000484	0	92	0.000465	0	92	0.000617	0	92	0.000459	0	92	0.000453	0	92	0.000495	0	92	0.000449	0
97	0.000528	0	97	0.000491	0	97	0.000472	0	97	0.000624	0	97	0.000466	0	97	0.000459	0	97	0.000502	0	97	0.000455	0
102	0.000535	0	102	0.000497	0	102	0.000478	0	102	0.000632	0	102	0.000472	0	102	0.000466	0	102	0.000509	0	102	0.000461	0
107	0.000542	0	107	0.000504	0	107	0.000485	0	107	0.000639	0	107	0.000478	0	107	0.000472	0	107	0.000515	0	107	0.000468	0
112	0.000548	0	112	0.000511	0	112	0.000492	0	112	0.000647	0	112	0.000485	0	112	0.000479	0	112	0.000522	0	112	0.000474	0
117	0.000555	0	117	0.000518	0	117	0.000498	0	117	0.000654	0	117	0.000492	0	117	0.000485	0	117	0.000529	0	117	0.00048	0
122	0.000562	0	122	0.000525	0	122	0.000505	0	122	0.000662	0	122	0.000498	0	122	0.000492	0	122	0.000536	0	122	0.000487	0
127	0.000569	0	127	0.000531	0	127	0.000512	0	127	0.00067	0	127	0.000505	0	127	0.000498	0	127	0.000543	0	127	0.000493	0
132	0.000576	0	132	0.000538	0	132	0.000518	0	132	0.000677	0	132	0.000511	0	132	0.000505	0	132	0.00055	0	132	0.0005	0
137	0.000583	0	137	0.000545	0	137	0.000525	0	137	0.000685	0	137	0.000518	0	137	0.000512	0	137	0.000557	0	137	0.000507	0
142	0.00059	0	142	0.000552	0	142	0.000532	0	142	0.000693	0	142	0.000525	0	142	0.000518	0	142	0.000564	0	142	0.000513	0
147	0.000598	0	147	0.000559	0	147	0.000539	0	147	0.0007	0	147	0.000532	0	147	0.000525	0	147	0.000571	1	147	0.00052	0
152	0.000605	0	152	0.000567	0	152	0.000546	0	152	0.000708	0	152	0.000539	0	152	0.000532	0	152	0.000578	0	152	0.000527	0
157	0.000612	0	157	0.000574	0	157	0.000553	0	157	0.000716	0	157	0.000546	0	157	0.000539	0	157	0.000585	0	157	0.000533	0
162	0.000619	0	162	0.000581	0	162	0.00056	0	162	0.000724	0	162	0.000553	0	162	0.000546	0	162	0.000592	0	162	0.00054	0
167	0.000627	0	167	0.000588	0	167	0.000567	0	167	0.000732	0	167	0.00056	0	167	0.000553	0	167	0.0006	0	167	0.000547	0
172	0.000634	0	172	0.000595	0	172	0.000574	0	172	0.00074	0	172	0.000567	0	172	0.00056	0	172	0.000607	0	172	0.000554	0
177	0.000641	0	177	0.000603	0	177	0.000581	0	177	0.000748	0	177	0.000574	0	177	0.000567	0	177	0.000614	0	177	0.000561	0
182	0.000649	0	182	0.00061	0	182	0.000589	0	182	0.000756	0	182	0.000581	0	182	0.000574	0	182	0.000622	0	182	0.000568	0
187	0.000656	0	187	0.000618	0	187	0.000596	0	187	0.000764	0	187	0.000588	0	187	0.000581	0	187	0.000629	0	187	0.000575	0
192	0.000664	0	192	0.000625	0	192	0.000603	0	192	0.000773	0	192	0.000595	0	192	0.000588	0	192	0.000637	0	192	0.000582	0
197	0.000671	0	197	0.000633	0	197	0.00061	0	197	0.000781	0	197	0.000603	0	197	0.000595	0	197	0.000644	0	197	0.000589	0
202	0.000679	0	202	0.00064	0	202	0.000618	0	202	0.000789	0	202	0.00061	0	202	0.000603	0	202	0.000652	0	202	0.000596	0
207	0.000687	0	207	0.000648	0	207	0.000625	0	207	0.000797	0	207	0.000617	0	207	0.00061	0	207	0.00066	0	207	0.000604	0
212	0.000694	0	212	0.000655	0	212	0.000633	0	212	0.000806	0	212	0.000625	0	212	0.000617	0	212	0.000667	0	212	0.000611	0
217	0.000702	0	217	0.000663	0	217	0.00064	0	217	0.000814	0	217	0.000632	0	217	0.000625	0	217	0.000675	0	217	0.000618	0
222	0.00071	0	222	0.000671	0	222	0.000648	0	222	0.000823	0	222	0.00064	0	222	0.000632	0	222	0.000683	0	222	0.000625	0
227	0.000718	0	227	0.000679	0	227	0.000656	0	227	0.000831	0	227	0.000647	0	227	0.000639	0	227	0.000691	0	227	0.000633	0
232	0.000726	0	232	0.000686	0	232	0.000663	0	232	0.00084	0	232	0.000655	0	232	0.000647	0	232	0.000698	0	232	0.00064	0
237	0.000734	0	237	0.000694	0	237	0.000671	0	237	0.000848	0	237	0.000662	0	237	0.000655	0	237	0.000706	0	237	0.000648	0
242	0.000742	0	242	0.000702	0	242	0.000679	0	242	0.000857	0	242	0.00067	0	242	0.000662	0	242	0.000714	0	242	0.000655	0
247	0.00075	0	247	0.00071	0	247	0.000686	0	247	0.000865	0	247	0.000678	0	247	0.00067	0	247	0.000722	0	247	0.000663	0
252	0.000758	0	252	0.000718	0	252	0.000694	0	252	0.000874	0	252	0.000685	0	252	0.000678	0	252	0.00073	0	252	0.00067	0
257	0.000766	0	257	0.000726	0	257	0.000702	0	257	0.000883	0	257	0.000693	0	257	0.000685	0	257	0.000738	0	257	0.000678	0
262	0.000774	0	262	0.000734	0	262	0.00071	0	262	0.000892	0	262	0.000701	0	262	0.000693	0	262	0.000746	0	262	0.000686	0
267	0.000782	0	267	0.000742	0	267	0.000718	0	267	0.000901	0	267	0.000709	0	267	0.000701	0	267	0.000755	0	267	0.000693	0
272	0.00079	0	272	0.000751	0	272	0.000726	0	272	0.000909	0	272	0.000717	0	272	0.000709	0	272	0.000763	0	272	0.000701	0
277	0.000798	0	277	0.000759	0	277	0.000734	0	277	0.000918	0	277	0.000725	0	277	0.000717	0	277	0.000771	0	277	0.000709	0
282	0.000807	0	282	0.000767	0	282	0.000742	0	282	0.000927	0	282	0.000733	0	282	0.000725	0	282	0.000779	0	282	0.000717	0
287	0.000815	0	287	0.000775	0	287	0.00075	0	287	0.000936	0	287	0.000741	0	287	0.000733	0	287	0.000788	0	287	0.000725	0
292	0.000824	0	292	0.000784	0	292	0.000759	0	292	0.000945	0	292	0.000749	0	292	0.000741	0	292	0.000796	0	292	0.000733	0
297	0.000832	0	297	0.000792	0	297	0.000767	0	297	0.000954	0	297	0.000757	0	297	0.000749	0	297	0.000805	0	297	0.000741	0
302	0.00084	0	302	0.000801	0	302	0.000775	0	302	0.000964	0	302	0.000765	0	302	0.000757	0	302	0.000813	0	302	0.000749	0
307	0.000849	0	307	0.000809	0	307	0.000783	0	307	0.000973	0	307	0.000774	0	307	0.000765	0	307	0.000822	0	307	0.000757	0
312	0.000858	0	312	0.000818	0	312	0.000792	0	312	0.000982	0	312	0.000782	0	312	0.000773	0	312	0.00083	0	312	0.000765	0
317	0.000866	0	317	0.000826	0	317	0.0008	0	317	0.000991	0	317	0.00079	0	317	0.000782	0	317	0.000839	0	317	0.000773	0
322	0.000875	0	322	0.000835	0	322	0.000809	0	322	0.001001	0	322	0.000798	0	322	0.00079	0	322	0.000847	0	322	0.000781	0
327	0.000884	0	327	0.000844	0	327	0.000817	0	327	0.00101	0	327	0.000807	0	327	0.000798	0	327	0.000856	0	327	0.00079	0
332	0.000892	0	332	0.000852	0	332	0.000826	0	332	0.001019	0	332	0.000815	0	332	0.000807	0	332	0.000865	0	332	0.000798	0
337	0.000901	0	337	0.000861	0	337	0.000834	0	337	0.001029	0	337	0.000824	0	337	0.000815	0	337	0.000874	0	337	0.000806	0
342	0.00091	0	342	0.00087	0	342	0.000843	0	342	0.001038	0	342	0.000832	0	342	0.000824	0	342	0.000883	0	342	0.000815	0
347	0.000919	0	347	0.000879	0	347	0.000852	0	347	0.001048	0	347	0.000841	0	347	0.000832	0	347	0.000891	0	347	0.000823	0
352	0.000928	0	352	0.000888	0	352	0.00086	0	352	0.001057	0	352	0.00085	0	352	0.000841	0	352	0.0009	0	352	0.000831	0
357	0.000937	0	357	0.000897	0	357	0.000869	0	357	0.001067	0	357	0.000858	0	357	0.000849	0	357	0.000909	0	357	0.00084	0
362	0.000946	0	362	0.000906	0	362	0.000878	0	362	0.001077	0	362	0.000867	0	362	0.000858	0	362	0.000918	0	362	0.000849	0
367	0.000955	0	367	0.000915	0	367	0.000887	0	367	0.001086	0	367	0.000876	1	367	0.000867	0	367	0.000927	0	367	0.000857	0
372	0.000964	0	372	0.000924	0	372	0.000896	0	372	0.001096	0	372	0.000885	0	372	0.000876	0	372	0.000936	0	372	0.000866	0
377	0.000973	0	377	0.000933	0	377	0.000905	0	377	0.001106	0	377	0.000893	0	377	0.000884	0	377	0.000946	0	377	0.000874	0
382	0.000982	0	382	0.000942	0	382	0.000914	0	382	0.001116	0	382	0.000902	0	382	0.000893	0	382	0.000955	0	382	0.000883	0
387	0.000991	0	387	0.000951	0	387	0.000923	0	387	0.001126	0	387	0.000911	0	387	0.000902	0	387	0.000964	0	387	0.000892	0
392	0.001001	0	392	0.000961	0	392	0.000932	0	392	0.001136	0	392	0.00092	0	392	0.000911	0	392	0.000973	0	392	0.000901	0
397	0.00101	0	397	0.00097	0	397	0.000941	0	397	0.001146	0	397	0.000929	0	397	0.00092	0	397	0.000983	0	397	0.00091	0
402	0.001019	0	402	0.000979	0	402	0.00095	0	402	0.001156	0	402	0.000938	0	402	0.000929	0	402	0.000992	0	402	0.000918	0
407	0.001029	0	407	0.000989	0	407	0.000959	0	407	0.001166	0	407	0.000947	0	407	0.000938	0	407	0.001001	0	407	0.000927	0
412	0.001038	0	412	0.000998	0	412	0.000969	0	412	0.001176	0	412	0.000957	0	412	0.000947	0	412	0.001011	0	412	0.000936	0
417	0.001047	0	417	0.001007	0	417	0.000978	0	417	0.001186	0	417	0.000966	0	417	0.000956	0	417	0.00102	0	417	0.000945	0
422	0.001057	0	422	0.001017	0	422	0.000987	0	422	0.001196	0	422	0.000975	0	422	0.000966	0	422	0.00103	0	422	0.000955	0
427	0.001067	0	427	0.001027	0	427	0.000997	0	427	0.001206	0	427	0.000984	0	427	0.000975	0	427	0.00104	0	427	0.000964	0
432	0.001076	0	432	0.001036	0	432	0.001006	0	432	0.001217	0	432	0.000994	0	432	0.000984	0	432	0.001049	0	432	0.000973	0
437	0.001086	0	437	0.001046	0	437	0.001016	0	437	0.001227	0	437	0.001003	0	437	0.000994	0	437	0.001059	0	437	0.000982	0
442	0.001095	0	442	0.001056	0	442	0.001025	0	442	0.001237	0	442	0.001013	0	442	0.001003	0	442	0.001069	0	442	0.000991	0
447	0.001105	0	447	0.001065	0	447	0.001035	0	447	0.001248	0	447	0.001022	0	447	0.001012	0	447	0.001078	0	447	0.001001	0
452	0.001115	0	452	0.001075	0	452	0.001044	0	452	0.001258	0	452	0.001032	0	452	0.001022	0	452	0.001088	0	452	0.00101	0
457	0.001125	0	457	0.001085	0	457	0.001054	0	457	0.001269	0	457	0.001041	0	457	0.001031	0	457	0.001098	0	457	0.001019	0
462	0.001135	0	462	0.001095	0	462	0.001064	0	462	0.001279	0	462	0.001051	0	462	0.001041	0	462	0.001108	0	462	0.001029	0
467	0.001145	0	467	0.001105	0	467	0.001073	0	467	0.00129	0	467	0.00106	0	467	0.00105	0	467	0.001118	0	467	0.001038	0
472	0.001154	0	472	0.001115	0	472	0.001083	0	472	0.0013	0	472	0.00107	0	472	0.00106	0	472	0.001128	0	472	0.001048	0
477	0.001164	0	477	0.001125	0	477	0.001093	0	477	0.001311	0	477	0.00108	0	477	0.00107	0	477	0.001138	0	477	0.001057	0
482	0.001174	0	482	0.001135	0	482	0.001103	0	482	0.001322	0	482	0.00109	0	482	0.001079	0	482	0.001148	0	482	0.001067	0
487	0.001185	0	487	0.001145	0	487	0.001113	0	487	0.001333	0	487	0.001099	0	487	0.001089	0	487	0.001158	0	487	0.001076	0
492	0.001195	0	492	0.001155	0	492	0.001123	0	492	0.001343	0	492	0.001109	0	492	0.001099	0	492	0.001168	0	492	0.001086	0
497	0.001205	0	497	0.001165	0	497	0.001133	0	497	0.001354	0	497	0.001119	0	497	0.001109	0	497	0.001178	0	497	0.001096	0
502	0.001215	0	502	0.001176	0	502	0.001143	0	502	0.001365	0	502	0.001129	0	502	0.001119	0	502	0.001189	0	502	0.001106	0
507	0.001225	0	507	0.001186	0	507	0.001153	0	507	0.001376	0	507	0.001139	0	507	0.001129	0	507	0.001199	0	507	0.001115	0
512	0.001236	0	512	0.001196	0	512	0.001163	0	512	0.001387	0	512	0.001149	0	512	0.001139	0	512	0.001209	0	512	0.001125	0
517	0.001246	0	517	0.001207	0	517	0.001173	0	517	0.001398	0	517	0.001159	0	517	0.001149	0	517	0.00122	0	517	0.001135	0
522	0.001256	0	522	0.001217	0	522	0.001184	0	522	0.001409	0	522	0.001169	0	522	0.001159	0	522	0.00123	0	522	0.001145	0
527	0.001267	0	527	0.001228	0	527	0.001194	0	527	0.00142	0	527	0.00118	0	527	0.001169	0	527	0.001241	0	527	0.001155	0
532	0.001277	0	532	0.001238	0	532	0.001204	0	532	0.001431	0	532	0.00119	0	532	0.001179	0	532	0.001251	0	532	0.001165	0
537	0.001288	0	537	0.001249	0	537	0.001215	0	537	0.001442	0	537	0.0012	0	537	0.001189	0	537	0.001262	0	537	0.001175	0
542	0.001298	0	542	0.001259	0	542	0.001225	0	542	0.001454	0	542	0.00121	0	542	0.0012	0	542	0.001272	0	542	0.001185	0
547	0.001309	0	547	0.00127	0	547	0.001236	0	547	0.001465	0	547	0.001221	0	547	0.00121	0	547	0.001283	0	547	0.001195	0
552	0.001319	0	552	0.001281	0	552	0.001246	0	552	0.001476	0	552	0.001231	0	552	0.00122	0	552	0.001294	0	552	0.001206	0
557	0.00133	0	557	0.001291	0	557	0.001257	0	557	0.001488	0	557	0.001242	0	557	0.001231	0	557	0.001305	0	557	0.001216	0
562	0.001341	0	562	0.001302	0	562	0.001267	0	562	0.001499	0	562	0.001252	0	562	0.001241	0	562	0.001315	0	562	0.001226	0
567	0.001352	0	567	0.001313	0	567	0.001278	0	567	0.001511	0	567	0.001263	0	567	0.001252	0	567	0.001326	0	567	0.001236	0
572	0.001362	0	572	0.001324	0	572	0.001289	0	572	0.001522	0	572	0.001273	0	572	0.001262	0	572	0.001337	0	572	0.001247	0
577	0.001373	0	577	0.001335	0	577	0.001299	0	577	0.001534	0	577	0.001284	0	577	0.001273	0	577	0.001348	0	577	0.001257	0
582	0.001384	0	582	0.001346	0	582	0.00131	0	582	0.001545	0	582	0.001294	0	582	0.001283	0	582	0.001359	0	582	0.001268	0
587	0.001395	0	587	0.001357	0	587	0.001321	0	587	0.001557	0	587	0.001305	0	587	0.001294	0	587	0.00137	0	587	0.001278	0
592	0.001406	0	592	0.001368	0	592	0.001332	0	592	0.001568	0	592	0.001316	0	592	0.001305	0	592	0.001381	0	592	0.001289	0
597	0.001417	0	597	0.001379	0	597	0.001343	0	597	0.00158	0	597	0.001327	0	597	0.001315	0	597	0.001392	0	597	0.001299	0
602	0.001428	0	602	0.00139	0	602	0.001354	0	602	0.001592	0	602	0.001337	0	602	0.001326	0	602	0.001403	0	602	0.00131	0
607	0.001439	0	607	0.001401	0	607	0.001365	0	607	0.001604	0	607	0.001348	0	607	0.001337	0	607	0.001414	0	607	0.001321	0
612	0.00145	0	612	0.001412	0	612	0.001376	0	612	0.001616	0	612	0.001359	0	612	0.001348	0	612	0.001426	0	612	0.001331	0
617	0.001462	0	617	0.001424	0	617	0.001387	0	617	0.001627	0	617	0.00137	0	617	0.001359	0	617	0.001437	0	617	0.001342	0
622	0.001473	0	622	0.001435	0	622	0.001398	0	622	0.001639	0	622	0.001381	0	622	0.00137	0	622	0.001448	0	622	0.001353	0
627	0.001484	0	627	0.001446	0	627	0.001409	0	627	0.001651	0	627	0.001392	0	627	0.001381	0	627	0.00146	0	627	0.001364	0
632	0.001495	0	632	0.001458	0	632	0.00142	0	632	0.001663	0	632	0.001403	0	632	0.001392	0	632	0.001471	0	632	0.001375	0
637	0.001507	0	637	0.001469	0	637	0.001432	0	637	0.001675	0	637	0.001415	0	637	0.001403	0	637	0.001483	0	637	0.001386	0
642	0.001518	0	642	0.001481	0	642	0.001443	0	642	0.001688	0	642	0.001426	0	642	0.001414	0	642	0.001494	0	642	0.001397	0
647	0.00153	0	647	0.001492	0	647	0.001454	0	647	0.0017	0	647	0.001437	0	647	0.001425	0	647	0.001506	0	647	0.001408	0
652	0.001541	0	652	0.001504	0	652	0.001466	0	652	0.001712	0	652	0.001448	0	652	0.001436	0	652	0.001517	0	652	0.001419	0
657	0.001553	0	657	0.001516	0	657	0.001477	0	657	0.001724	0	657	0.00146	0	657	0.001448	0	657	0.001529	0	657	0.00143	0
662	0.001564	0	662	0.001527	0	662	0.001489	0	662	0.001736	0	662	0.001471	0	662	0.001459	0	662	0.001541	0	662	0.001441	0
667	0.001576	0	667	0.001539	0	667	0.0015	0	667	0.001749	0	667	0.001482	0	667	0.00147	0	667	0.001552	0	667	0.001452	0
672	0.001588	0	672	0.001551	0	672	0.001512	0	672	0.001761	0	672	0.001494	0	672	0.001482	0	672	0.001564	0	672	0.001463	0
677	0.001599	0	677	0.001563	0	677	0.001523	0	677	0.001773	0	677	0.001505	0	677	0.001493	0	677	0.001576	0	677	0.001475	0
682	0.001611	0	682	0.001574	0	682	0.001535	0	682	0.001786	0	682	0.001517	0	682	0.001505	0	682	0.001588	0	682	0.001486	0
687	0.001623	0	687	0.001586	0	687	0.001547	0	687	0.001798	0	687	0.001528	0	687	0.001516	0	687	0.0016	0	687	0.001497	0
692	0.001635	0	692	0.001598	0	692	0.001558	0	692	0.001811	0	692	0.00154	0	692	0.001528	0	692	0.001612	0	692	0.001509	0
697	0.001647	0	697	0.00161	0	697	0.00157	0	697	0.001824	0	697	0.001552	0	697	0.001539	0	697	0.001624	0	697	0.00152	0
702	0.001658	0	702	0.001622	0	702	0.001582	0	702	0.001836	0	702	0.001563	0	702	0.001551	0	702	0.001636	0	702	0.001532	0
707	0.00167	0	707	0.001634	0	707	0.001594	0	707	0.001849	0	707	0.001575	0	707	0.001563	0	707	0.001648	0	707	0.001543	0
712	0.001682	0	712	0.001647	0	712	0.001606	0	712	0.001862	0	712	0.001587	0	712	0.001575	0	712	0.00166	0	712	0.001555	0
717	0.001694	0	717	0.001659	0	717	0.001618	0	717	0.001874	0	717	0.001599	0	717	0.001586	0	717	0.001672	0	717	0.001566	0
722	0.001707	0	722	0.001671	0	722	0.00163	0	722	0.001887	0	722	0.001611	0	722	0.001598	0	722	0.001684	0	722	0.001578	0
727	0.001719	0	727	0.001683	0	727	0.001642	0	727	0.0019	0	727	0.001623	0	727	0.00161	0	727	0.001696	0	727	0.00159	0
732	0.001731	0	732	0.001696	0	732	0.001654	0	732	0.001913	0	732	0.001635	0	732	0.001622	0	732	0.001709	0	732	0.001602	0
737	0.001743	0	737	0.001708	0	737	0.001666	0	737	0.001926	0	737	0.001647	0	737	0.001634	0	737	0.001721	0	737	0.001613	0
742	0.001755	0	742	0.00172	0	742	0.001678	0	742	0.001939	0	742	0.001659	0	742	0.001646	0	742	0.001733	0	742	0.001625	0
747	0.001768	0	747	0.001733	0	747	0.001691	0	747	0.001952	0	747	0.001671	0	747	0.001658	0	747	0.001746	0	747	0.001637	0
752	0.00178	0	752	0.001745	0	752	0.001703	0	752	0.001965	0	752	0.001683	0	752	0.00167	0	752	0.001758	0	752	0.001649	0
757	0.001792	0	757	0.001758	0	757	0.001715	0	757	0.001978	0	757	0.001695	0	757	0.001682	0	757	0.001771	0	757	0.001661	0
762	0.001805	0	762	0.00177	0	762	0.001728	0	762	0.001991	0	762	0.001707	0	762	0.001695	0	762	0.001783	0	762	0.001673	0
767	0.001817	0	767	0.001783	0	767	0.00174	0	767	0.002004	0	767	0.00172	0	767	0.001707	0	767	0.001796	0	767	0.001685	0
772	0.00183	0	772	0.001796	0	772	0.001753	0	772	0.002018	0	772	0.001732	0	772	0.001719	0	772	0.001809	0	772	0.001697	0
777	0.001842	0	777	0.001808	0	777	0.001765	0	777	0.002031	0	777	0.001744	0	777	0.001731	0	777	0.001821	0	777	0.001709	0
782	0.001855	0	782	0.001821	0	782	0.001778	0	782	0.002044	0	782	0.001757	0	782	0.001744	0	782	0.001834	0	782	0.001721	0
787	0.001868	0	787	0.001834	0	787	0.00179	0	787	0.002058	0	787	0.001769	0	787	0.001756	0	787	0.001847	0	787	0.001734	0
792	0.00188	0	792	0.001847	0	792	0.001803	0	792	0.002071	0	792	0.001782	0	792	0.001769	0	792	0.00186	0	792	0.001746	0
797	0.001893	0	797	0.00186	0	797	0.001816	0	797	0.002084	0	797	0.001794	0	797	0.001781	0	797	0.001873	0	797	0.001758	0
802	0.001906	0	802	0.001873	0	802	0.001828	0	802	0.002098	0	802	0.001807	0	802	0.001794	0	802	0.001886	0	802	0.001771	0
807	0.001919	0	807	0.001886	0	807	0.001841	0	807	0.002111	0	807	0.00182	0	807	0.001806	0	807	0.001899	0	807	0.001783	0
812	0.001932	0	812	0.001899	0	812	0.001854	0	812	0.002125	0	812	0.001832	0	812	0.001819	0	812	0.001912	0	812	0.001796	0
817	0.001945	0	817	0.001912	0	817	0.001867	0	817	0.002139	0	817	0.001845	0	817	0.001832	0	817	0.001925	0	817	0.001808	0
822	0.001958	0	822	0.001925	0	822	0.00188	0	822	0.002152	0	822	0.001858	0	822	0.001844	0	822	0.001938	0	822	0.001821	0
827	0.001971	0	827	0.001938	0	827	0.001893	0	827	0.002166	0	827	0.001871	0	827	0.001857	0	827	0.001951	0	827	0.001833	0
832	0.001984	0	832	0.001951	0	832	0.001906	0	832	0.00218	0	832	0.001884	0	832	0.00187	0	832	0.001964	0	832	0.001846	0
837	0.001997	0	837	0.001965	0	837	0.001919	0	837	0.002194	0	837	0.001896	0	837	0.001883	0	837	0.001977	0	837	0.001858	0
842	0.00201	0	842	0.001978	0	842	0.001932	0	842	0.002207	0	842	0.001909	0	842	0.001896	0	842	0.001991	0	842	0.001871	0
847	0.002023	0	847	0.001991	0	847	0.001945	0	847	0.002221	0	847	0.001922	0	847	0.001909	0	847	0.002004	0	847	0.001884	0
852	0.002036	0	852	0.002005	0	852	0.001958	0	852	0.002235	0	852	0.001935	0	852	0.001922	0	852	0.002017	0	852	0.001897	0
857	0.002049	0	857	0.002018	0	857	0.001971	0	857	0.002249	0	857	0.001949	0	857	0.001935	0	857	0.002031	0	857	0.00191	0
862	0.002063	0	862	0.002031	0	862	0.001985	0	862	0.002263	0	862	0.001962	0	862	0.001948	0	862	0.002044	0	862	0.001922	0
867	0.002076	0	867	0.002045	0	867	0.001998	0	867	0.002277	0	867	0.001975	0	867	0.001961	0	867	0.002058	0	867	0.001935	0
872	0.002089	0	872	0.002059	0	872	0.002011	0	872	0.002291	0	872	0.001988	0	872	0.001974	0	872	0.002071	0	872	0.001948	0
877	0.002103	0	877	0.002072	0	877	0.002025	0	877	0.002306	0	877	0.002001	0	877	0.001987	0	877	0.002085	0	877	0.001961	0
882	0.002116	0	882	0.002086	0	882	0.002038	0	882	0.00232	0	882	0.002015	0	882	0.002	0	882	0.002099	0	882	0.001974	0
887	0.00213	0	887	0.0021	0	887	0.002052	0	887	0.002334	0	887	0.002028	0	887	0.002014	0	887	0.002112	0	887	0.001987	0
892	0.002143	0	892	0.002113	0	892	0.002065	0	892	0.002348	0	892	0.002041	0	892	0.002027	0	892	0.002126	0	892	0.002001	0
897	0.002157	0	897	0.002127	0	897	0.002079	0	897	0.002363	0	897	0.002055	0	897	0.00204	0	897	0.00214	0	897	0.002014	0
902	0.002171	0	902	0.002141	0	902	0.002092	0	902	0.002377	0	902	0.002068	0	902	0.002054	0	902	0.002154	0	902	0.002027	0
907	0.002184	0	907	0.002155	0	907	0.002106	0	907	0.002391	0	907	0.002082	0	907	0.002067	0	907	0.002167	0	907	0.00204	0
912	0.002198	0	912	0.002169	0	912	0.00212	0	912	0.002406	0	912	0.002095	0	912	0.002081	0	912	0.002181	0	912	0.002054	0
917	0.002212	0	917	0.002183	0	917	0.002133	0	917	0.00242	0	917	0.002109	0	917	0.002094	0	917	0.002195	0	917	0.002067	0
922	0.002226	0	922	0.002197	0	922	0.002147	0	922	0.002435	0	922	0.002123	0	922	0.002108	0	922	0.002209	0	922	0.00208	0
927	0.00224	0	927	0.002211	0	927	0.002161	0	927	0.00245	0	927	0.002136	0	927	0.002122	0	927	0.002223	0	927	0.002094	0
932	0.002253	0	932	0.002225	0	932	0.002175	0	932	0.002464	0	932	0.00215	0	932	0.002135	0	932	0.002237	0	932	0.002107	0
937	0.002267	0	937	0.002239	0	937	0.002189	0	937	0.002479	0	937	0.002164	0	937	0.002149	0	937	0.002251	0	937	0.002121	0
942	0.002281	0	942	0.002253	0	942	0.002203	0	942	0.002494	0	942	0.002178	0	942	0.002163	0	942	0.002266	0	942	0.002134	0
947	0.002295	0	947	0.002267	0	947	0.002217	0	947	0.002508	0	947	0.002192	0	947	0.002177	0	947	0.00228	0	947	0.002148	0
952	0.002309	0	952	0.002282	0	952	0.002231	0	952	0.002523	0	952	0.002206	0	952	0.002191	0	952	0.002294	0	952	0.002162	0
957	0.002324	0	957	0.002296	0	957	0.002245	0	957	0.002538	0	957	0.002219	0	957	0.002204	0	957	0.002308	0	957	0.002175	0
962	0.002338	0	962	0.00231	0	962	0.002259	0	962	0.002553	0	962	0.002233	0	962	0.002218	0	962	0.002323	0	962	0.002189	0
967	0.002352	0	967	0.002325	0	967	0.002273	0	967	0.002568	0	967	0.002248	0	967	0.002232	0	967	0.002337	0	967	0.002203	0
972	0.002366	0	972	0.002339	0	972	0.002288	0	972	0.002583	0	972	0.002262	0	972	0.002246	0	972	0.002352	0	972	0.002217	0
977	0.002381	0	977	0.002354	0	977	0.002302	0	977	0.002598	0	977	0.002276	0	977	0.002261	0	977	0.002366	0	977	0.002231	0
982	0.002395	0	982	0.002368	0	982	0.002316	0	982	0.002613	0	982	0.00229	0	982	0.002275	0	982	0.002381	0	982	0.002245	0
987	0.002409	0	987	0.002383	0	987	0.002331	0	987	0.002628	0	987	0.002304	0	987	0.002289	0	987	0.002395	0	987	0.002259	0
992	0.002424	0	992	0.002398	0	992	0.002345	0	992	0.002643	0	992	0.002318	0	992	0.002303	0	992	0.00241	0	992	0.002273	0
997	0.002438	0	997	0.002412	0	997	0.00236	0	997	0.002658	0	997	0.002333	0	997	0.002317	0	997	0.002424	0	997	0.002287	0
1002	0.002453	0	1002	0.002427	0	1002	0.002374	0	1002	0.002674	0	1002	0.002347	0	1002	0.002332	0	1002	0.002439	1	1002	0.002301	0
1007	0.002467	0	1007	0.002442	0	1007	0.002389	0	1007	0.002689	0	1007	0.002362	0	1007	0.002346	0	1007	0.002454	0	1007	0.002315	0
1012	0.002482	0	1012	0.002457	0	1012	0.002403	0	1012	0.002704	0	1012	0.002376	0	1012	0.00236	0	1012	0.002469	0	1012	0.002329	0
1017	0.002496	0	1017	0.002472	0	1017	0.002418	0	1017	0.00272	0	1017	0.002391	0	1017	0.002375	0	1017	0.002484	0	1017	0.002343	0
1022	0.002511	0	1022	0.002487	0	1022	0.002433	0	1022	0.002735	0	1022	0.002405	0	1022	0.002389	0	1022	0.002498	0	1022	0.002358	0
1027	0.002526	0	1027	0.002501	0	1027	0.002447	0	1027	0.002751	0	1027	0.00242	0	1027	0.002404	0	1027	0.002513	0	1027	0.002372	0
1032	0.002541	0	1032	0.002516	0	1032	0.002462	0	1032	0.002766	0	1032	0.002434	0	1032	0.002418	0	1032	0.002528	0	1032	0.002386	0
1037	0.002555	0	1037	0.002532	0	1037	0.002477	0	1037	0.002782	0	1037	0.002449	0	1037	0.002433	0	1037	0.002543	0	1037	0.002401	0
1042	0.00257	0	1042	0.002547	0	1042	0.002492	0	1042	0.002797	0	1042	0.002464	0	1042	0.002448	0	1042	0.002558	0	1042	0.002415	0
1047	0.002585	0	1047	0.002562	0	1047	0.002507	0	1047	0.002813	0	1047	0.002478	0	1047	0.002462	0	1047	0.002574	0	1047	0.00243	0
1052	0.0026	0	1052	0.002577	0	1052	0.002522	0	1052	0.002828	0	1052	0.002493	0	1052	0.002477	0	1052	0.002589	0	1052	0.002444	0
1057	0.002615	0	1057	0.002592	0	1057	0.002537	0	1057	0.002844	0	1057	0.002508	0	1057	0.002492	0	1057	0.002604	0	1057	0.002459	0
1062	0.00263	0	1062	0.002607	0	1062	0.002552	0	1062	0.00286	0	1062	0.002523	0	1062	0.002507	0	1062	0.002619	0	1062	0.002473	0
1067	0.002645	0	1067	0.002623	0	1067	0.002567	0	1067	0.002876	0	1067	0.002538	0	1067	0.002522	0	1067	0.002634	0	1067	0.002488	0
1072	0.00266	0	1072	0.002638	0	1072	0.002582	0	1072	0.002892	0	1072	0.002553	0	1072	0.002537	0	1072	0.00265	0	1072	0.002503	0
1077	0.002675	0	1077	0.002654	0	1077	0.002597	0	1077	0.002908	0	1077	0.002568	0	1077	0.002552	0	1077	0.002665	0	1077	0.002517	0
1082	0.002691	0	1082	0.002669	0	1082	0.002612	0	1082	0.002923	0	1082	0.002583	0	1082	0.002567	0	1082	0.002681	0	1082	0.002532	0
1087	0.002706	0	1087	0.002684	0	1087	0.002628	0	1087	0.002939	0	1087	0.002598	0	1087	0.002582	0	1087	0.002696	0	1087	0.002547	0
1092	0.002721	0	1092	0.0027	0	1092	0.002643	0	1092	0.002955	0	1092	0.002613	0	1092	0.002597	0	1092	0.002711	0	1092	0.002562	0
1097	0.002736	0	1097	0.002716	0	1097	0.002658	0	1097	0.002972	0	1097	0.002628	0	1097	0.002612	0	1097	0.002727	0	1097	0.002577	0
1102	0.002752	0	1102	0.002731	0	1102	0.002674	0	1102	0.002988	0	1102	0.002644	0	1102	0.002627	0	1102	0.002743	0	1102	0.002592	0
1107	0.002767	0	1107	0.002747	0	1107	0.002689	0	1107	0.003004	0	1107	0.002659	0	1107	0.002642	0	1107	0.002758	0	1107	0.002607	0
1112	0.002783	0	1112	0.002763	0	1112	0.002705	0	1112	0.00302	0	1112	0.002674	0	1112	0.002658	0	1112	0.002774	0	1112	0.002622	0
1117	0.002798	0	1117	0.002778	0	1117	0.00272	0	1117	0.003036	0	1117	0.00269	0	1117	0.002673	0	1117	0.00279	0	1117	0.002637	0
1122	0.002814	0	1122	0.002794	0	1122	0.002736	0	1122	0.003053	0	1122	0.002705	0	1122	0.002688	0	1122	0.002805	0	1122	0.002652	0
1127	0.002829	0	1127	0.00281	0	1127	0.002751	0	1127	0.003069	0	1127	0.002721	0	1127	0.002704	0	1127	0.002821	0	1127	0.002667	0
1132	0.002845	0	1132	0.002826	0	1132	0.002767	0	1132	0.003085	0	1132	0.002736	0	1132	0.002719	0	1132	0.002837	0	1132	0.002682	0
1137	0.002861	0	1137	0.002842	0	1137	0.002783	0	1137	0.003102	0	1137	0.002752	0	1137	0.002735	0	1137	0.002853	0	1137	0.002698	0
1142	0.002876	0	1142	0.002858	0	1142	0.002799	0	1142	0.003118	0	1142	0.002767	0	1142	0.00275	0	1142	0.002869	0	1142	0.002713	0
1147	0.002892	0	1147	0.002874	0	1147	0.002814	0	1147	0.003135	0	1147	0.002783	0	1147	0.002766	0	1147	0.002885	0	1147	0.002728	0
1152	0.002908	0	1152	0.00289	0	1152	0.00283	0	1152	0.003151	0	1152	0.002799	0	1152	0.002781	0	1152	0.002901	0	1152	0.002744	0
1157	0.002924	0	1157	0.002906	0	1157	0.002846	0	1157	0.003168	0	1157	0.002814	0	1157	0.002797	0	1157	0.002917	0	1157	0.002759	0
1162	0.002939	0	1162	0.002922	0	1162	0.002862	0	1162	0.003184	0	1162	0.00283	0	1162	0.002813	0	1162	0.002933	0	1162	0.002775	0
1167	0.002955	0	1167	0.002939	0	1167	0.002878	0	1167	0.003201	0	1167	0.002846	0	1167	0.002828	0	1167	0.002949	0	1167	0.00279	0
1172	0.002971	0	1172	0.002955	0	1172	0.002894	0	1172	0.003218	0	1172	0.002862	0	1172	0.002844	0	1172	0.002966	0	1172	0.002806	0
1177	0.002987	0	1177	0.002971	0	1177	0.00291	0	1177	0.003235	0	1177	0.002878	0	1177	0.00286	0	1177	0.002982	0	1177	0.002821	0
1182	0.003003	0	1182	0.002987	0	1182	0.002926	0	1182	0.003251	0	1182	0.002894	0	1182	0.002876	0	1182	0.002998	0	1182	0.002837	0
1187	0.00302	0	1187	0.003004	0	1187	0.002942	0	1187	0.003268	0	1187	0.00291	0	1187	0.002892	0	1187	0.003015	0	1187	0.002853	0
1192	0.003036	0	1192	0.00302	0	1192	0.002959	0	1192	0.003285	0	1192	0.002926	0	1192	0.002908	0	1192	0.003031	0	1192	0.002868	0
1197	0.003052	0	1197	0.003037	0	1197	0.002975	0	1197	0.003302	0	1197	0.002942	0	1197	0.002924	0	1197	0.003047	0	1197	0.002884	0
1202	0.003068	0	1202	0.003053	0	1202	0.002991	0	1202	0.003319	0	1202	0.002958	0	1202	0.00294	0	1202	0.003064	0	1202	0.0029	0
1207	0.003084	0	1207	0.00307	0	1207	0.003008	0	1207	0.003336	0	1207	0.002974	0	1207	0.002956	0	1207	0.00308	0	1207	0.002916	0
1212	0.003101	0	1212	0.003087	0	1212	0.003024	0	1212	0.003353	0	1212	0.00299	0	1212	0.002972	0	1212	0.003097	0	1212	0.002932	0
1217	0.003117	0	1217	0.003103	0	1217	0.00304	0	1217	0.00337	0	1217	0.003006	0	1217	0.002989	0	1217	0.003114	0	1217	0.002948	0
1222	0.003133	0	1222	0.00312	0	1222	0.003057	0	1222	0.003387	0	1222	0.003023	0	1222	0.003005	0	1222	0.00313	0	1222	0.002964	0
1227	0.00315	0	1227	0.003137	0	1227	0.003073	0	1227	0.003405	0	1227	0.003039	0	1227	0.003021	0	1227	0.003147	0	1227	0.00298	0
1232	0.003166	0	1232	0.003153	0	1232	0.00309	0	1232	0.003422	0	1232	0.003055	0	1232	0.003037	0	1232	0.003164	0	1232	0.002996	0
1237	0.003183	0	1237	0.00317	0	1237	0.003107	0	1237	0.003439	0	1237	0.003072	0	1237	0.003054	0	1237	0.00318	0	1237	0.003012	0
1242	0.003199	0	1242	0.003187	0	1242	0.003123	0	1242	0.003457	0	1242	0.003088	0	1242	0.00307	0	1242	0.003197	0	1242	0.003028	0
1247	0.003216	0	1247	0.003204	0	1247	0.00314	0	1247	0.003474	0	1247	0.003105	0	1247	0.003087	0	1247	0.003214	0	1247	0.003044	0
1252	0.003233	0	1252	0.003221	0	1252	0.003157	0	1252	0.003491	0	1252	0.003121	0	1252	0.003103	0	1252	0.003231	0	1252	0.003061	0
1257	0.003249	0	1257	0.003238	0	1257	0.003173	0	1257	0.003509	0	1257	0.003138	0	1257	0.00312	0	1257	0.003248	0	1257	0.003077	0
1262	0.003266	0	1262	0.003255	0	1262	0.00319	0	1262	0.003526	0	1262	0.003155	0	1262	0.003136	0	1262	0.003265	0	1262	0.003093	0
1267	0.003283	0	1267	0.003272	0	1267	0.003207	0	1267	0.003544	0	1267	0.003171	0	1267	0.003153	0	1267	0.003282	0	1267	0.00311	0
1272	0.0033	0	1272	0.003289	0	1272	0.003224	0	1272	0.003562	0	1272	0.003188	0	1272	0.00317	0	1272	0.003299	0	1272	0.003126	0
1277	0.003317	0	1277	0.003307	0	1277	0.003241	0	1277	0.003579	0	1277	0.003205	0	1277	0.003186	0	1277	0.003316	0	1277	0.003143	0
1282	0.003334	0	1282	0.003324	0	1282	0.003258	0	1282	0.003597	0	1282	0.003222	0	1282	0.003203	0	1282	0.003334	0	1282	0.003159	0
1287	0.003351	0	1287	0.003341	0	1287	0.003275	0	1287	0.003615	0	1287	0.003239	0	1287	0.00322	0	1287	0.003351	0	1287	0.003176	0
1292	0.003368	0	1292	0.003359	0	1292	0.003292	0	1292	0.003632	0	1292	0.003256	0	1292	0.003237	0	1292	0.003368	0	1292	0.003192	0
1297	0.003385	0	1297	0.003376	0	1297	0.003309	0	1297	0.00365	0	1297	0.003273	0	1297	0.003254	0	1297	0.003385	0	1297	0.003209	0
1302	0.003402	0	1302	0.003393	0	1302	0.003326	0	1302	0.003668	0	1302	0.00329	0	1302	0.003271	0	1302	0.003403	0	1302	0.003226	0
1307	0.003419	0	1307	0.003411	0	1307	0.003344	0	1307	0.003686	0	1307	0.003307	0	1307	0.003288	0	1307	0.00342	0	1307	0.003242	0
1312	0.003436	0	1312	0.003428	0	1312	0.003361	0	1312	0.003704	0	1312	0.003324	0	1312	0.003305	0	1312	0.003438	0	1312	0.003259	0
1317	0.003453	0	1317	0.003446	0	1317	0.003378	0	1317	0.003722	0	1317	0.003341	0	1317	0.003322	0	1317	0.003455	0	1317	0.003276	0
1322	0.00347	0	1322	0.003464	0	1322	0.003396	0	1322	0.00374	0	1322	0.003358	0	1322	0.003339	0	1322	0.003473	0	1322	0.003293	0
1327	0.003488	0	1327	0.003481	0	1327	0.003413	0	1327	0.003758	0	1327	0.003375	0	1327	0.003356	0	1327	0.00349	0	1327	0.00331	0
1332	0.003505	0	1332	0.003499	0	1332	0.003431	0	1332	0.003776	0	1332	0.003393	0	1332	0.003373	0	1332	0.003508	0	1332	0.003327	0
1337	0.003522	0	1337	0.003517	0	1337	0.003448	0	1337	0.003794	0	1337	0.00341	0	1337	0.003391	0	1337	0.003526	0	1337	0.003344	0
1342	0.00354	0	1342	0.003534	0	1342	0.003466	0	1342	0.003812	0	1342	0.003427	0	1342	0.003408	0	1342	0.003543	0	1342	0.003361	0
1347	0.003557	0	1347	0.003552	0	1347	0.003483	0	1347	0.003831	0	1347	0.003445	0	1347	0.003425	0	1347	0.003561	0	1347	0.003378	0
1352	0.003575	0	1352	0.00357	0	1352	0.003501	0	1352	0.003849	0	1352	0.003462	0	1352	0.003443	0	1352	0.003579	0	1352	0.003395	0
1357	0.003592	0	1357	0.003588	0	1357	0.003518	0	1357	0.003867	0	1357	0.00348	0	1357	0.00346	0	1357	0.003597	0	1357	0.003412	0
1362	0.00361	0	1362	0.003606	0	1362	0.003536	0	1362	0.003886	0	1362	0.003497	0	1362	0.003478	0	1362	0.003615	0	1362	0.003429	0
1367	0.003628	0	1367	0.003624	0	1367	0.003554	0	1367	0.003904	0	1367	0.003515	0	1367	0.003495	0	1367	0.003633	0	1367	0.003447	0
1372	0.003645	0	1372	0.003642	0	1372	0.003572	0	1372	0.003923	0	1372	0.003532	0	1372	0.003513	0	1372	0.003651	0	1372	0.003464	0
1377	0.003663	0	1377	0.00366	0	1377	0.00359	0	1377	0.003941	0	1377	0.00355	0	1377	0.00353	0	1377	0.003669	0	1377	0.003481	0
1382	0.003681	0	1382	0.003678	0	1382	0.003607	0	1382	0.00396	0	1382	0.003568	0	1382	0.003548	0	1382	0.003687	0	1382	0.003499	0
1387	0.003699	0	1387	0.003697	0	1387	0.003625	0	1387	0.003978	0	1387	0.003585	0	1387	0.003566	0	1387	0.003705	0	1387	0.003516	0
1392	0.003717	0	1392	0.003715	0	1392	0.003643	0	1392	0.003997	0	1392	0.003603	0	1392	0.003583	0	1392	0.003723	0	1392	0.003534	0
1397	0.003734	0	1397	0.003733	0	1397	0.003661	0	1397	0.004016	0	1397	0.003621	0	1397	0.003601	0	1397	0.003741	0	1397	0.003551	0
1402	0.003752	0	1402	0.003751	0	1402	0.00368	0	1402	0.004034	0	1402	0.003639	0	1402	0.003619	0	1402	0.00376	0	1402	0.003569	0
1407	0.00377	0	1407	0.00377	0	1407	0.003698	0	1407	0.004053	0	1407	0.003657	0	1407	0.003637	0	1407	0.003778	0	1407	0.003586	0
1412	0.003788	0	1412	0.003788	0	1412	0.003716	0	1412	0.004072	0	1412	0.003675	0	1412	0.003655	0	1412	0.003796	0	1412	0.003604	0
1417	0.003807	0	1417	0.003807	0	1417	0.003734	0	1417	0.004091	0	1417	0.003693	0	1417	0.003673	0	1417	0.003815	0	1417	0.003622	0
1422	0.003825	0	1422	0.003825	0	1422	0.003752	0	1422	0.00411	0	1422	0.003711	0	1422	0.003691	0	1422	0.003833	0	1422	0.003639	0
1427	0.003843	0	1427	0.003844	0	1427	0.003771	0	1427	0.004129	0	1427	0.003729	0	1427	0.003709	0	1427	0.003852	0	1427	0.003657	0
1432	0.003861	0	1432	0.003862	0	1432	0.003789	0	1432	0.004148	0	1432	0.003747	0	1432	0.003727	0	1432	0.00387	0	1432	0.003675	0
1437	0.003879	0	1437	0.003881	0	1437	0.003807	0	1437	0.004167	0	1437	0.003765	0	1437	0.003745	0	1437	0.003889	0	1437	0.003693	0
1442	0.003898	0	1442	0.0039	0	1442	0.003826	0	1442	0.004186	0	1442	0.003784	0	1442	0.003763	0	1442	0.003907	0	1442	0.003711	0
1447	0.003916	0	1447	0.003918	0	1447	0.003844	0	1447	0.004205	0	1447	0.003802	0	1447	0.003781	0	1447	0.003926	0	1447	0.003729	0
1452	0.003934	0	1452	0.003937	0	1452	0.003863	0	1452	0.004224	0	1452	0.00382	0	1452	0.0038	0	1452	0.003945	0	1452	0.003747	0
1457	0.003953	0	1457	0.003956	0	1457	0.003881	0	1457	0.004243	0	1457	0.003839	0	1457	0.003818	0	1457	0.003963	0	1457	0.003765	0
1462	0.003971	0	1462	0.003975	0	1462	0.0039	0	1462	0.004262	0	1462	0.003857	0	1462	0.003836	0	1462	0.003982	0	1462	0.003783	0
1467	0.00399	0	1467	0.003994	0	1467	0.003919	0	1467	0.004282	0	1467	0.003876	0	1467	0.003855	0	1467	0.004001	0	1467	0.003801	0
1472	0.004008	0	1472	0.004013	0	1472	0.003937	0	1472	0.004301	0	1472	0.003894	0	1472	0.003873	0	1472	0.00402	0	1472	0.003819	0
1477	0.004027	0	1477	0.004032	0	1477	0.003956	0	1477	0.00432	0	1477	0.003913	0	1477	0.003892	0	1477	0.004039	0	1477	0.003837	0
1482	0.004045	0	1482	0.004051	0	1482	0.003975	0	1482	0.00434	0	1482	0.003931	0	1482	0.00391	0	1482	0.004058	0	1482	0.003856	0
1487	0.004064	0	1487	0.00407	0	1487	0.003994	0	1487	0.004359	0	1487	0.00395	0	1487	0.003929	0	1487	0.004077	0	1487	0.003874	0
1492	0.004083	0	1492	0.004089	0	1492	0.004012	0	1492	0.004379	0	1492	0.003968	0	1492	0.003947	0	1492	0.004096	0	1492	0.003892	0
1497	0.004102	0	1497	0.004108	0	1497	0.004031	0	1497	0.004398	0	1497	0.003987	0	1497	0.003966	0	1497	0.004115	0	1497	0.003911	0
1502	0.00412	0	1502	0.004127	0	1502	0.00405	0	1502	0.004418	0	1502	0.004006	0	1502	0.003985	0	1502	0.004134	0	1502	0.003929	0
1507	0.004139	0	1507	0.004147	0	1507	0.004069	0	1507	0.004438	0	1507	0.004025	0	1507	0.004004	0	1507	0.004153	0	1507	0.003948	0
1512	0.004158	0	1512	0.004166	0	1512	0.004088	0	1512	0.004457	0	1512	0.004044	0	1512	0.004022	0	1512	0.004173	0	1512	0.003966	0
1517	0.004177	0	1517	0.004185	0	1517	0.004108	0	1517	0.004477	0	1517	0.004063	0	1517	0.004041	0	1517	0.004192	0	1517	0.003985	0
1522	0.004196	0	1522	0.004205	0	1522	0.004127	0	1522	0.004497	0	1522	0.004082	0	1522	0.00406	0	1522	0.004211	0	1522	0.004003	0
1527	0.004215	0	1527	0.004224	0	1527	0.004146	0	1527	0.004517	0	1527	0.004101	0	1527	0.004079	0	1527	0.004231	0	1527	0.004022	0
1532	0.004234	0	1532	0.004244	0	1532	0.004165	0	1532	0.004537	0	1532	0.00412	0	1532	0.004098	0	1532	0.00425	0	1532	0.004041	0
1537	0.004253	0	1537	0.004263	0	1537	0.004184	0	1537	0.004556	0	1537	0.004139	0	1537	0.004117	0	1537	0.00427	0	1537	0.004059	0
1542	0.004272	0	1542	0.004283	0	1542	0.004204	0	1542	0.004576	0	1542	0.004158	0	1542	0.004136	0	1542	0.004289	0	1542	0.004078	0
1547	0.004292	0	1547	0.004302	0	1547	0.004223	0	1547	0.004596	0	1547	0.004177	0	1547	0.004155	0	1547	0.004309	0	1547	0.004097	0
1552	0.004311	0	1552	0.004322	0	1552	0.004242	0	1552	0.004616	0	1552	0.004196	0	1552	0.004174	0	1552	0.004328	0	1552	0.004116	0
1557	0.00433	0	1557	0.004342	0	1557	0.004262	0	1557	0.004637	0	1557	0.004215	0	1557	0.004194	0	1557	0.004348	0	1557	0.004135	0
1562	0.004349	0	1562	0.004361	0	1562	0.004281	0	1562	0.004657	0	1562	0.004235	0	1562	0.004213	0	1562	0.004368	0	1562	0.004154	0
1567	0.004369	0	1567	0.004381	0	1567	0.004301	0	1567	0.004677	0	1567	0.004254	0	1567	0.004232	0	1567	0.004387	0	1567	0.004173	0
1572	0.004388	0	1572	0.004401	0	1572	0.004321	0	1572	0.004697	0	1572	0.004273	0	1572	0.004251	0	1572	0.004407	0	1572	0.004192	0
1577	0.004408	0	1577	0.004421	0	1577	0.00434	0	1577	0.004717	0	1577	0.004293	0	1577	0.004271	0	1577	0.004427	0	1577	0.004211	0
1582	0.004427	0	1582	0.004441	0	1582	0.00436	0	1582	0.004738	0	1582	0.004312	0	1582	0.00429	0	1582	0.004447	0	1582	0.00423	0
1587	0.004447	0	1587	0.004461	0	1587	0.00438	0	1587	0.004758	0	1587	0.004332	0	1587	0.00431	0	1587	0.004467	0	1587	0.004249	0
1592	0.004466	0	1592	0.004481	0	1592	0.004399	0	1592	0.004778	0	1592	0.004351	0	1592	0.004329	0	1592	0.004487	0	1592	0.004268	0
1597	0.004486	0	1597	0.004501	0	1597	0.004419	0	1597	0.004799	0	1597	0.004371	0	1597	0.004349	0	1597	0.004507	0	1597	0.004287	0
1602	0.004506	0	1602	0.004521	0	1602	0.004439	0	1602	0.004819	0	1602	0.004391	0	1602	0.004368	0	1602	0.004527	0	1602	0.004307	0
1607	0.004525	0	1607	0.004541	0	1607	0.004459	0	1607	0.00484	0	1607	0.00441	0	1607	0.004388	0	1607	0.004547	0	1607	0.004326	0
1612	0.004545	0	1612	0.004562	0	1612	0.004479	0	1612	0.00486	0	1612	0.00443	0	1612	0.004408	0	1612	0.004567	0	1612	0.004345	0
1617	0.004565	0	1617	0.004582	0	1617	0.004499	0	1617	0.004881	0	1617	0.00445	0	1617	0.004427	0	1617	0.004587	0	1617	0.004365	0
1622	0.004585	0	1622	0.004602	0	1622	0.004519	0	1622	0.004902	0	1622	0.00447	0	1622	0.004447	0	1622	0.004607	0	1622	0.004384	0
1627	0.004605	0	1627	0.004622	0	1627	0.004539	0	1627	0.004922	0	1627	0.00449	0	1627	0.004467	0	1627	0.004627	0	1627	0.004404	0
1632	0.004624	0	1632	0.004643	0	1632	0.004559	0	1632	0.004943	0	1632	0.004509	0	1632	0.004487	0	1632	0.004648	0	1632	0.004423	0
1637	0.004644	0	1637	0.004663	0	1637	0.004579	0	1637	0.004964	0	1637	0.004529	0	1637	0.004507	0	1637	0.004668	0	1637	0.004443	0
1642	0.004664	0	1642	0.004684	0	1642	0.004599	0	1642	0.004985	0	1642	0.004549	0	1642	0.004527	0	1642	0.004689	0	1642	0.004463	0
1647	0.004685	0	1647	0.004704	0	1647	0.00462	0	1647	0.005005	0	1647	0.00457	0	1647	0.004547	0	1647	0.004709	0	1647	0.004482	0
1652	0.004705	0	1652	0.004725	0	1652	0.00464	0	1652	0.005026	0	1652	0.00459	0	1652	0.004567	0	1652	0.004729	0	1652	0.004502	0
1657	0.004725	0	1657	0.004745	0	1657	0.00466	0	1657	0.005047	0	1657	0.00461	0	1657	0.004587	0	1657	0.00475	0	1657	0.004522	0
1662	0.004745	0	1662	0.004766	0	1662	0.004681	0	1662	0.005068	0	1662	0.00463	0	1662	0.004607	0	1662	0.004771	0	1662	0.004542	0
1667	0.004765	0	1667	0.004787	0	1667	0.004701	0	1667	0.005089	0	1667	0.00465	0	1667	0.004627	0	1667	0.004791	0	1667	0.004561	0
1672	0.004785	0	1672	0.004808	0	1672	0.004722	0	1672	0.00511	0	1672	0.00467	0	1672	0.004647	0	1672	0.004812	0	1672	0.004581	0
1677	0.004806	0	1677	0.004828	0	1677	0.004742	0	1677	0.005132	0	1677	0.004691	0	1677	0.004667	0	1677	0.004833	0	1677	0.004601	0
1682	0.004826	0	1682	0.004849	0	1682	0.004763	0	1682	0.005153	0	1682	0.004711	0	1682	0.004688	0	1682	0.004853	0	1682	0.004621	0
1687	0.004846	0	1687	0.00487	0	1687	0.004783	0	1687	0.005174	0	1687	0.004731	0	1687	0.004708	0	1687	0.004874	0	1687	0.004641	0
1692	0.004867	0	1692	0.004891	0	1692	0.004804	0	1692	0.005195	0	1692	0.004752	0	1692	0.004728	0	1692	0.004895	0	1692	0.004661	0
1697	0.004887	0	1697	0.004912	0	1697	0.004825	0	1697	0.005216	0	1697	0.004772	0	1697	0.004749	0	1697	0.004916	0	1697	0.004681	0
1702	0.004908	0	1702	0.004933	0	1702	0.004845	0	1702	0.005238	0	1702	0.004793	0	1702	0.004769	0	1702	0.004937	0	1702	0.004702	0
1707	0.004929	0	1707	0.004954	0	1707	0.004866	0	1707	0.005259	0	1707	0.004814	0	1707	0.00479	0	1707	0.004958	0	1707	0.004722	0
1712	0.004949	0	1712	0.004975	0	1712	0.004887	0	1712	0.005281	0	1712	0.004834	0	1712	0.00481	0	1712	0.004979	0	1712	0.004742	0
1717	0.00497	0	1717	0.004996	0	1717	0.004908	0	1717	0.005302	0	1717	0.004855	0	1717	0.004831	0	1717	0.005	0	1717	0.004762	0
1722	0.00499	0	1722	0.005018	0	1722	0.004929	0	1722	0.005324	0	1722	0.004876	0	1722	0.004852	0	1722	0.005021	0	1722	0.004783	0
1727	0.005011	0	1727	0.005039	0	1727	0.00495	0	1727	0.005345	0	1727	0.004896	0	1727	0.004872	0	1727	0.005042	0	1727	0.004803	0
1732	0.005032	0	1732	0.00506	0	1732	0.004971	0	1732	0.005367	0	1732	0.004917	0	1732	0.004893	0	1732	0.005063	0	1732	0.004824	0
1737	0.005053	0	1737	0.005081	0	1737	0.004992	0	1737	0.005388	0	1737	0.004938	0	1737	0.004914	0	1737	0.005085	0	1737	0.004844	0
1742	0.005074	0	1742	0.005103	0	1742	0.005013	0	1742	0.00541	0	1742	0.004959	0	1742	0.004935	0	1742	0.005106	0	1742	0.004864	0
1747	0.005095	0	1747	0.005124	0	1747	0.005034	0	1747	0.005432	0	1747	0.00498	0	1747	0.004956	0	1747	0.005127	0	1747	0.004885	0
1752	0.005116	0	1752	0.005146	0	1752	0.005055	0	1752	0.005454	0	1752	0.005001	0	1752	0.004976	0	1752	0.005148	0	1752	0.004906	0
1757	0.005137	0	1757	0.005167	0	1757	0.005077	0	1757	0.005475	0	1757	0.005022	0	1757	0.004997	0	1757	0.00517	0	1757	0.004926	0
1762	0.005158	0	1762	0.005189	0	1762	0.005098	0	1762	0.005497	0	1762	0.005043	0	1762	0.005018	0	1762	0.005191	0	1762	0.004947	0
1767	0.005179	0	1767	0.00521	0	1767	0.005119	0	1767	0.005519	0	1767	0.005064	0	1767	0.005039	0	1767	0.005213	0	1767	0.004968	0
1772	0.0052	0	1772	0.005232	0	1772	0.005141	0	1772	0.005541	0	1772	0.005085	0	1772	0.005061	0	1772	0.005234	0	1772	0.004988	0
1777	0.005221	0	1777	0.005254	0	1777	0.005162	0	1777	0.005563	0	1777	0.005106	0	1777	0.005082	0	1777	0.005256	0	1777	0.005009	0
1782	0.005242	0	1782	0.005275	0	1782	0.005183	0	1782	0.005585	0	1782	0.005127	0	1782	0.005103	0	1782	0.005278	0	1782	0.00503	0
1787	0.005264	0	1787	0.005297	0	1787	0.005205	0	1787	0.005607	0	1787	0.005149	0	1787	0.005124	0	1787	0.005299	0	1787	0.005051	0
1792	0.005285	0	1792	0.005319	0	1792	0.005227	0	1792	0.005629	0	1792	0.00517	0	1792	0.005145	0	1792	0.005321	0	1792	0.005072	0
1797	0.005306	0	1797	0.005341	0	1797	0.005248	0	1797	0.005652	0	1797	0.005191	0	1797	0.005167	0	1797	0.005343	0	1797	0.005093	0
1802	0.005328	0	1802	0.005363	0	1802	0.00527	0	1802	0.005674	0	1802	0.005213	0	1802	0.005188	0	1802	0.005365	0	1802	0.005114	0
1807	0.005349	0	1807	0.005385	0	1807	0.005291	0	1807	0.005696	0	1807	0.005234	0	1807	0.005209	0	1807	0.005387	0	1807	0.005135	0
1812	0.00537	0	1812	0.005407	0	1812	0.005313	0	1812	0.005718	0	1812	0.005256	0	1812	0.005231	0	1812	0.005408	0	1812	0.005156	0
1817	0.005392	0	1817	0.005429	0	1817	0.005335	0	1817	0.005741	0	1817	0.005277	0	1817	0.005252	0	1817	0.00543	0	1817	0.005177	0
1822	0.005414	0	1822	0.005451	0	1822	0.005357	0	1822	0.005763	0	1822	0.005299	0	1822	0.005274	0	1822	0.005452	0	1822	0.005198	0
1827	0.005435	0	1827	0.005473	0	1827	0.005379	0	1827	0.005786	0	1827	0.005321	0	1827	0.005295	0	1827	0.005474	0	1827	0.00522	0
1832	0.005457	0	1832	0.005495	0	1832	0.0054	0	1832	0.005808	0	1832	0.005342	0	1832	0.005317	0	1832	0.005497	0	1832	0.005241	0
1837	0.005478	0	1837	0.005517	0	1837	0.005422	0	1837	0.005831	0	1837	0.005364	0	1837	0.005339	0	1837	0.005519	0	1837	0.005262	0
1842	0.0055	0	1842	0.00554	0	1842	0.005444	0	1842	0.005853	0	1842	0.005386	0	1842	0.00536	0	1842	0.005541	0	1842	0.005284	0
1847	0.005522	0	1847	0.005562	0	1847	0.005466	0	1847	0.005876	0	1847	0.005408	0	1847	0.005382	0	1847	0.005563	0	1847	0.005305	0
1852	0.005544	0	1852	0.005584	0	1852	0.005489	0	1852	0.005898	0	1852	0.005429	0	1852	0.005404	0	1852	0.005585	0	1852	0.005327	0
1857	0.005566	0	1857	0.005607	0	1857	0.005511	0	1857	0.005921	0	1857	0.005451	0	1857	0.005426	0	1857	0.005608	0	1857	0.005348	0
1862	0.005588	0	1862	0.005629	0	1862	0.005533	0	1862	0.005944	0	1862	0.005473	0	1862	0.005448	0	1862	0.00563	0	1862	0.00537	0
1867	0.00561	0	1867	0.005652	0	1867	0.005555	0	1867	0.005967	0	1867	0.005495	0	1867	0.00547	0	1867	0.005652	0	1867	0.005391	0
1872	0.005632	0	1872	0.005674	0	1872	0.005577	0	1872	0.005989	0	1872	0.005517	0	1872	0.005492	0	1872	0.005675	0	1872	0.005413	0
1877	0.005654	0	1877	0.005697	0	1877	0.0056	0	1877	0.006012	0	1877	0.005539	0	1877	0.005514	0	1877	0.005697	0	1877	0.005435	0
1882	0.005676	0	1882	0.00572	0	1882	0.005622	0	1882	0.006035	0	1882	0.005562	0	1882	0.005536	0	1882	0.00572	0	1882	0.005456	0
1887	0.005698	0	1887	0.005742	0	1887	0.005644	0	1887	0.006058	0	1887	0.005584	0	1887	0.005558	0	1887	0.005742	0	1887	0.005478	0
1892	0.00572	0	1892	0.005765	0	1892	0.005667	0	1892	0.006081	0	1892	0.005606	0	1892	0.00558	0	1892	0.005765	0	1892	0.0055	0
1897	0.005742	0	1897	0.005788	0	1897	0.005689	0	1897	0.006104	0	1897	0.005628	0	1897	0.005602	0	1897	0.005788	0	1897	0.005522	0
1902	0.005764	0	1902	0.005811	0	1902	0.005712	0	1902	0.006127	0	1902	0.00565	0	1902	0.005624	0	1902	0.00581	0	1902	0.005544	0
1907	0.005787	0	1907	0.005833	0	1907	0.005734	0	1907	0.00615	0	1907	0.005673	0	1907	0.005647	0	1907	0.005833	0	1907	0.005565	0
1912	0.005809	0	1912	0.005856	0	1912	0.005757	0	1912	0.006174	0	1912	0.005695	0	1912	0.005669	0	1912	0.005856	0	1912	0.005587	0
1917	0.005831	0	1917	0.005879	0	1917	0.00578	0	1917	0.006197	0	1917	0.005718	0	1917	0.005691	0	1917	0.005879	0	1917	0.005609	0
1922	0.005854	0	1922	0.005902	0	1922	0.005802	0	1922	0.00622	0	1922	0.00574	0	1922	0.005714	0	1922	0.005902	0	1922	0.005632	0
1927	0.005876	0	1927	0.005925	0	1927	0.005825	0	1927	0.006243	0	1927	0.005763	0	1927	0.005736	0	1927	0.005925	0	1927	0.005654	0
1932	0.005899	0	1932	0.005948	0	1932	0.005848	0	1932	0.006267	0	1932	0.005785	0	1932	0.005759	0	1932	0.005948	0	1932	0.005676	0
1937	0.005921	0	1937	0.005971	0	1937	0.005871	0	1937	0.00629	0	1937	0.005808	0	1937	0.005781	0	1937	0.005971	0	1937	0.005698	0
1942	0.005944	0	1942	0.005995	0	1942	0.005894	0	1942	0.006314	0	1942	0.00583	0	1942	0.005804	0	1942	0.005994	0	1942	0.00572	0
1947	0.005967	0	1947	0.006018	0	1947	0.005917	0	1947	0.006337	0	1947	0.005853	0	1947	0.005826	0	1947	0.006017	0	1947	0.005743	0
1952	0.005989	0	1952	0.006041	0	1952	0.00594	0	1952	0.006361	0	1952	0.005876	0	1952	0.005849	0	1952	0.00604	0	1952	0.005765	0
1957	0.006012	0	1957	0.006064	0	1957	0.005963	0	1957	0.006384	0	1957	0.005899	0	1957	0.005872	0	1957	0.006063	0	1957	0.005787	0
1962	0.006035	0	1962	0.006088	0	1962	0.005986	0	1962	0.006408	0	1962	0.005921	0	1962	0.005895	0	1962	0.006086	0	1962	0.00581	0
1967	0.006058	0	1967	0.006111	0	1967	0.006009	0	1967	0.006431	0	1967	0.005944	0	1967	0.005917	0	1967	0.00611	0	1967	0.005832	0
1972	0.00608	0	1972	0.006135	0	1972	0.006032	0	1972	0.006455	0	1972	0.005967	0	1972	0.00594	0	1972	0.006133	0	1972	0.005855	0
1977	0.006103	0	1977	0.006158	0	1977	0.006055	0	1977	0.006479	0	1977	0.00599	0	1977	0.005963	0	1977	0.006156	0	1977	0.005877	0
1982	0.006126	0	1982	0.006182	0	1982	0.006078	0	1982	0.006503	0	1982	0.006013	0	1982	0.005986	0	1982	0.00618	0	1982	0.0059	0
1987	0.006149	0	1987	0.006205	0	1987	0.006102	0	1987	0.006526	0	1987	0.006036	0	1987	0.006009	0	1987	0.006203	0	1987	0.005922	0
1992	0.006172	0	1992	0.006229	0	1992	0.006125	0	1992	0.00655	0	1992	0.006059	0	1992	0.006032	0	1992	0.006227	0	1992	0.005945	0
1997	0.006195	0	1997	0.006253	0	1997	0.006148	0	1997	0.006574	0	1997	0.006082	0	1997	0.006055	0	1997	0.00625	0	1997	0.005968	0
2002	0.006218	0	2002	0.006276	0	2002	0.006172	0	2002	0.006598	0	2002	0.006106	0	2002	0.006078	0	2002	0.006274	0	2002	0.005991	0
2007	0.006242	0	2007	0.0063	0	2007	0.006195	0	2007	0.006622	0	2007	0.006129	0	2007	0.006101	0	2007	0.006298	0	2007	0.006013	0
2012	0.006265	0	2012	0.006324	0	2012	0.006219	0	2012	0.006646	0	2012	0.006152	0	2012	0.006125	0	2012	0.006321	0	2012	0.006036	0
2017	0.006288	0	2017	0.006348	0	2017	0.006242	0	2017	0.00667	0	2017	0.006175	0	2017	0.006148	0	2017	0.006345	0	2017	0.006059	0
2022	0.006311	0	2022	0.006372	0	2022	0.006266	0	2022	0.006695	0	2022	0.006199	0	2022	0.006171	0	2022	0.006369	0	2022	0.006082	0
2027	0.006335	0	2027	0.006395	0	2027	0.006289	0	2027	0.006719	0	2027	0.006222	0	2027	0.006195	0	2027	0.006393	0	2027	0.006105	0
2032	0.006358	0	2032	0.006419	0	2032	0.006313	0	2032	0.006743	0	2032	0.006246	0	2032	0.006218	0	2032	0.006416	0	2032	0.006128	0
2037	0.006381	0	2037	0.006443	0	2037	0.006337	0	2037	0.006767	0	2037	0.006269	0	2037	0.006241	0	2037	0.00644	0	2037	0.006151	0
2042	0.006405	0	2042	0.006468	0	2042	0.006361	0	2042	0.006791	0	2042	0.006293	0	2042	0.006265	0	2042	0.006464	0	2042	0.006174	0
2047	0.006428	0	2047	0.006492	0	2047	0.006384	0	2047	0.006816	0	2047	0.006316	0	2047	0.006288	0	2047	0.006488	0	2047	0.006197	0
2052	0.006452	0	2052	0.006516	0	2052	0.006408	0	2052	0.00684	0	2052	0.00634	0	2052	0.006312	0	2052	0.006512	0	2052	0.00622	0
2057	0.006475	0	2057	0.00654	0	2057	0.006432	0	2057	0.006865	0	2057	0.006363	0	2057	0.006335	0	2057	0.006536	0	2057	0.006244	0
2062	0.006499	0	2062	0.006564	0	2062	0.006456	0	2062	0.006889	0	2062	0.006387	0	2062	0.006359	0	2062	0.006561	0	2062	0.006267	0
2067	0.006523	0	2067	0.006589	0	2067	0.00648	0	2067	0.006914	0	2067	0.006411	0	2067	0.006383	0	2067	0.006585	0	2067	0.00629	0
2072	0.006546	0	2072	0.006613	0	2072	0.006504	0	2072	0.006938	0	2072	0.006435	0	2072	0.006406	0	2072	0.006609	0	2072	0.006314	0
2077	0.00657	0	2077	0.006637	0	2077	0.006528	0	2077	0.006963	0	2077	0.006459	0	2077	0.00643	0	2077	0.006633	0	2077	0.006337	0
2082	0.006594	0	2082	0.006662	0	2082	0.006552	0	2082	0.006988	0	2082	0.006482	0	2082	0.006454	0	2082	0.006658	0	2082	0.006361	0
2087	0.006618	0	2087	0.006686	0	2087	0.006577	0	2087	0.007012	0	2087	0.006506	0	2087	0.006478	0	2087	0.006682	0	2087	0.006384	0
2092	0.006642	0	2092	0.006711	0	2092	0.006601	0	2092	0.007037	0	2092	0.00653	0	2092	0.006502	0	2092	0.006706	0	2092	0.006408	0
2097	0.006666	0	2097	0.006735	0	2097	0.006625	0	2097	0.007062	0	2097	0.006554	0	2097	0.006526	0	2097	0.006731	0	2097	0.006431	0
2102	0.00669	0	2102	0.00676	0	2102	0.006649	0	2102	0.007087	0	2102	0.006578	0	2102	0.00655	0	2102	0.006755	0	2102	0.006455	0
2107	0.006714	0	2107	0.006785	0	2107	0.006674	0	2107	0.007111	0	2107	0.006603	0	2107	0.006574	0	2107	0.00678	0	2107	0.006478	0
2112	0.006738	0	2112	0.006809	0	2112	0.006698	0	2112	0.007136	0	2112	0.006627	0	2112	0.006598	0	2112	0.006804	0	2112	0.006502	0
2117	0.006762	0	2117	0.006834	0	2117	0.006723	0	2117	0.007161	0	2117	0.006651	0	2117	0.006622	0	2117	0.006829	0	2117	0.006526	0
2122	0.006786	0	2122	0.006859	0	2122	0.006747	0	2122	0.007186	0	2122	0.006675	0	2122	0.006646	0	2122	0.006854	0	2122	0.00655	0
2127	0.00681	0	2127	0.006884	0	2127	0.006772	0	2127	0.007211	0	2127	0.006699	0	2127	0.00667	0	2127	0.006878	0	2127	0.006574	0
2132	0.006834	0	2132	0.006908	0	2132	0.006796	0	2132	0.007236	0	2132	0.006724	0	2132	0.006695	0	2132	0.006903	0	2132	0.006597	0
2137	0.006859	0	2137	0.006933	0	2137	0.006821	0	2137	0.007262	0	2137	0.006748	0	2137	0.006719	0	2137	0.006928	0	2137	0.006621	0
2142	0.006883	0	2142	0.006958	0	2142	0.006845	0	2142	0.007287	0	2142	0.006772	0	2142	0.006743	0	2142	0.006953	0	2142	0.006645	0
2147	0.006907	0	2147	0.006983	0	2147	0.00687	0	2147	0.007312	0	2147	0.006797	0	2147	0.006768	0	2147	0.006978	0	2147	0.006669	0
2152	0.006932	0	2152	0.007008	0	2152	0.006895	0	2152	0.007337	0	2152	0.006821	0	2152	0.006792	0	2152	0.007002	0	2152	0.006693	0
2157	0.006956	0	2157	0.007033	0	2157	0.00692	0	2157	0.007363	0	2157	0.006846	0	2157	0.006817	0	2157	0.007027	0	2157	0.006718	0
2162	0.006981	0	2162	0.007059	0	2162	0.006944	0	2162	0.007388	0	2162	0.006871	0	2162	0.006841	0	2162	0.007052	0	2162	0.006742	0
2167	0.007005	0	2167	0.007084	0	2167	0.006969	0	2167	0.007413	0	2167	0.006895	0	2167	0.006866	0	2167	0.007078	0	2167	0.006766	0
2172	0.00703	0	2172	0.007109	0	2172	0.006994	0	2172	0.007439	0	2172	0.00692	0	2172	0.00689	0	2172	0.007103	0	2172	0.00679	0
2177	0.007054	0	2177	0.007134	0	2177	0.007019	0	2177	0.007464	0	2177	0.006945	0	2177	0.006915	0	2177	0.007128	0	2177	0.006814	0
2182	0.007079	0	2182	0.00716	0	2182	0.007044	0	2182	0.00749	0	2182	0.006969	0	2182	0.00694	0	2182	0.007153	0	2182	0.006839	0
2187	0.007104	0	2187	0.007185	0	2187	0.007069	0	2187	0.007515	0	2187	0.006994	0	2187	0.006964	0	2187	0.007178	0	2187	0.006863	0
2192	0.007128	0	2192	0.00721	0	2192	0.007094	0	2192	0.007541	0	2192	0.007019	0	2192	0.006989	0	2192	0.007204	0	2192	0.006887	0
2197	0.007153	0	2197	0.007236	0	2197	0.00712	0	2197	0.007567	0	2197	0.007044	0	2197	0.007014	0	2197	0.007229	0	2197	0.006912	0
2202	0.007178	0	2202	0.007261	0	2202	0.007145	0	2202	0.007592	0	2202	0.007069	0	2202	0.007039	0	2202	0.007254	0	2202	0.006936	0
2207	0.007203	0	2207	0.007287	0	2207	0.00717	0	2207	0.007618	0	2207	0.007094	0	2207	0.007064	0	2207	0.00728	0	2207	0.006961	0
2212	0.007228	0	2212	0.007313	0	2212	0.007195	0	2212	0.007644	0	2212	0.007119	0	2212	0.007089	0	2212	0.007305	0	2212	0.006985	0
2217	0.007253	0	2217	0.007338	0	2217	0.007221	0	2217	0.00767	0	2217	0.007144	0	2217	0.007114	0	2217	0.007331	0	2217	0.00701	0
2222	0.007278	0	2222	0.007364	0	2222	0.007246	0	2222	0.007696	0	2222	0.007169	0	2222	0.007139	0	2222	0.007356	0	2222	0.007035	0
2227	0.007303	0	2227	0.00739	0	2227	0.007271	0	2227	0.007721	0	2227	0.007194	0	2227	0.007164	0	2227	0.007382	0	2227	0.007059	0
2232	0.007328	0	2232	0.007415	0	2232	0.007297	0	2232	0.007747	0	2232	0.007219	0	2232	0.007189	0	2232	0.007407	0	2232	0.007084	0
2237	0.007353	0	2237	0.007441	0	2237	0.007322	0	2237	0.007773	0	2237	0.007245	0	2237	0.007214	0	2237	0.007433	0	2237	0.007109	0
2242	0.007378	0	2242	0.007467	0	2242	0.007348	0	2242	0.0078	0	2242	0.00727	0	2242	0.00724	0	2242	0.007459	0	2242	0.007134	0
2247	0.007403	0	2247	0.007493	0	2247	0.007374	0	2247	0.007826	0	2247	0.007295	0	2247	0.007265	0	2247	0.007485	0	2247	0.007159	0
2252	0.007429	0	2252	0.007519	0	2252	0.007399	0	2252	0.007852	0	2252	0.007321	0	2252	0.00729	0	2252	0.00751	0	2252	0.007184	0
2257	0.007454	0	2257	0.007545	0	2257	0.007425	0	2257	0.007878	0	2257	0.007346	0	2257	0.007315	0	2257	0.007536	0	2257	0.007209	0
2262	0.007479	0	2262	0.007571	0	2262	0.007451	0	2262	0.007904	0	2262	0.007372	0	2262	0.007341	0	2262	0.007562	0	2262	0.007234	0
2267	0.007505	0	2267	0.007597	0	2267	0.007476	0	2267	0.00793	0	2267	0.007397	0	2267	0.007366	0	2267	0.007588	0	2267	0.007259	0
2272	0.00753	0	2272	0.007623	0	2272	0.007502	0	2272	0.007957	0	2272	0.007423	0	2272	0.007392	0	2272	0.007614	0	2272	0.007284	0
2277	0.007556	0	2277	0.007649	0	2277	0.007528	0	2277	0.007983	0	2277	0.007448	0	2277	0.007417	0	2277	0.00764	0	2277	0.007309	0
2282	0.007581	0	2282	0.007676	0	2282	0.007554	0	2282	0.008009	0	2282	0.007474	0	2282	0.007443	0	2282	0.007666	0	2282	0.007334	0
2287	0.007607	0	2287	0.007702	0	2287	0.00758	0	2287	0.008036	0	2287	0.0075	0	2287	0.007469	0	2287	0.007692	0	2287	0.007359	0
2292	0.007632	0	2292	0.007728	0	2292	0.007606	0	2292	0.008062	0	2292	0.007525	0	2292	0.007494	0	2292	0.007719	0	2292	0.007385	0
2297	0.007658	0	2297	0.007755	0	2297	0.007632	0	2297	0.008089	0	2297	0.007551	0	2297	0.00752	0	2297	0.007745	0	2297	0.00741	0
2302	0.007684	0	2302	0.007781	0	2302	0.007658	0	2302	0.008116	0	2302	0.007577	0	2302	0.007546	0	2302	0.007771	0	2302	0.007435	0
2307	0.007709	0	2307	0.007807	0	2307	0.007684	0	2307	0.008142	0	2307	0.007603	0	2307	0.007572	0	2307	0.007797	0	2307	0.007461	0
2312	0.007735	0	2312	0.007834	0	2312	0.00771	0	2312	0.008169	0	2312	0.007629	0	2312	0.007597	0	2312	0.007824	0	2312	0.007486	0
2317	0.007761	0	2317	0.00786	0	2317	0.007737	0	2317	0.008195	0	2317	0.007655	0	2317	0.007623	0	2317	0.00785	0	2317	0.007512	0
2322	0.007787	0	2322	0.007887	0	2322	0.007763	0	2322	0.008222	0	2322	0.007681	0	2322	0.007649	0	2322	0.007877	0	2322	0.007537	0
2327	0.007813	0	2327	0.007914	0	2327	0.007789	0	2327	0.008249	0	2327	0.007707	0	2327	0.007675	0	2327	0.007903	0	2327	0.007563	0
2332	0.007839	0	2332	0.00794	0	2332	0.007816	0	2332	0.008276	0	2332	0.007733	0	2332	0.007701	0	2332	0.00793	0	2332	0.007588	0
2337	0.007865	0	2337	0.007967	0	2337	0.007842	0	2337	0.008303	0	2337	0.007759	0	2337	0.007727	0	2337	0.007956	0	2337	0.007614	0
2342	0.007891	0	2342	0.007994	0	2342	0.007868	0	2342	0.00833	0	2342	0.007785	0	2342	0.007753	0	2342	0.007983	0	2342	0.00764	0
2347	0.007917	0	2347	0.008021	0	2347	0.007895	0	2347	0.008357	0	2347	0.007811	0	2347	0.00778	0	2347	0.008009	0	2347	0.007665	0
2352	0.007943	0	2352	0.008047	0	2352	0.007921	0	2352	0.008384	0	2352	0.007838	0	2352	0.007806	0	2352	0.008036	0	2352	0.007691	0
2357	0.007969	0	2357	0.008074	0	2357	0.007948	0	2357	0.008411	0	2357	0.007864	0	2357	0.007832	0	2357	0.008063	0	2357	0.007717	0
2362	0.007995	0	2362	0.008101	0	2362	0.007975	0	2362	0.008438	0	2362	0.00789	0	2362	0.007858	0	2362	0.00809	0	2362	0.007743	0
2367	0.008022	0	2367	0.008128	0	2367	0.008001	0	2367	0.008465	0	2367	0.007917	0	2367	0.007885	0	2367	0.008117	0	2367	0.007769	0
2372	0.008048	0	2372	0.008155	0	2372	0.008028	0	2372	0.008492	0	2372	0.007943	0	2372	0.007911	0	2372	0.008143	0	2372	0.007795	0
2377	0.008074	0	2377	0.008182	0	2377	0.008055	0	2377	0.008519	0	2377	0.00797	0	2377	0.007937	0	2377	0.00817	0	2377	0.007821	0
2382	0.008101	0	2382	0.008209	0	2382	0.008082	0	2382	0.008547	0	2382	0.007996	0	2382	0.007964	0	2382	0.008197	0	2382	0.007847	0
2387	0.008127	0	2387	0.008237	0	2387	0.008108	0	2387	0.008574	0	2387	0.008023	0	2387	0.00799	0	2387	0.008224	0	2387	0.007873	0
2392	0.008153	0	2392	0.008264	0	2392	0.008135	0	2392	0.008601	0	2392	0.008049	0	2392	0.008017	0	2392	0.008251	0	2392	0.007899	0
2397	0.00818	0	2397	0.008291	0	2397	0.008162	0	2397	0.008629	0	2397	0.008076	0	2397	0.008043	0	2397	0.008279	0	2397	0.007925	0
2402	0.008206	0	2402	0.008318	0	2402	0.008189	0	2402	0.008656	0	2402	0.008103	0	2402	0.00807	0	2402	0.008306	0	2402	0.007952	0
2407	0.008233	0	2407	0.008346	0	2407	0.008216	0	2407	0.008684	0	2407	0.008129	0	2407	0.008097	0	2407	0.008333	0	2407	0.007978	0
2412	0.00826	0	2412	0.008373	0	2412	0.008243	0	2412	0.008711	0	2412	0.008156	0	2412	0.008124	0	2412	0.00836	0	2412	0.008004	0
2417	0.008286	0	2417	0.008401	0	2417	0.00827	0	2417	0.008739	0	2417	0.008183	0	2417	0.00815	0	2417	0.008387	0	2417	0.00803	0
2422	0.008313	0	2422	0.008428	0	2422	0.008297	0	2422	0.008766	0	2422	0.00821	0	2422	0.008177	0	2422	0.008415	0	2422	0.008057	0
2427	0.00834	0	2427	0.008456	0	2427	0.008325	0	2427	0.008794	0	2427	0.008237	0	2427	0.008204	0	2427	0.008442	0	2427	0.008083	0
2432	0.008367	0	2432	0.008483	0	2432	0.008352	0	2432	0.008822	0	2432	0.008264	0	2432	0.008231	0	2432	0.00847	0	2432	0.00811	0
2437	0.008394	0	2437	0.008511	0	2437	0.008379	0	2437	0.008849	0	2437	0.008291	0	2437	0.008258	0	2437	0.008497	0	2437	0.008136	0
2442	0.00842	0	2442	0.008538	0	2442	0.008407	0	2442	0.008877	0	2442	0.008318	0	2442	0.008285	0	2442	0.008525	0	2442	0.008163	0
2447	0.008447	0	2447	0.008566	0	2447	0.008434	0	2447	0.008905	0	2447	0.008345	0	2447	0.008312	0	2447	0.008552	0	2447	0.008189	0
2452	0.008474	0	2452	0.008594	0	2452	0.008461	0	2452	0.008933	0	2452	0.008372	0	2452	0.008339	0	2452	0.00858	0	2452	0.008216	0
2457	0.008501	0	2457	0.008622	0	2457	0.008489	0	2457	0.008961	0	2457	0.008399	0	2457	0.008366	0	2457	0.008607	0	2457	0.008243	0
2462	0.008528	0	2462	0.00865	0	2462	0.008516	0	2462	0.008989	0	2462	0.008427	0	2462	0.008393	0	2462	0.008635	0	2462	0.00827	0
2467	0.008556	0	2467	0.008677	0	2467	0.008544	0	2467	0.009017	0	2467	0.008454	0	2467	0.00842	0	2467	0.008663	0	2467	0.008296	0
2472	0.008583	0	2472	0.008705	0	2472	0.008571	0	2472	0.009045	0	2472	0.008481	0	2472	0.008448	0	2472	0.008691	0	2472	0.008323	0
2477	0.00861	0	2477	0.008733	0	2477	0.008599	0	2477	0.009073	0	2477	0.008509	0	2477	0.008475	0	2477	0.008718	0	2477	0.00835	0
2482	0.008637	0	2482	0.008761	0	2482	0.008627	0	2482	0.009101	0	2482	0.008536	0	2482	0.008502	0	2482	0.008746	0	2482	0.008377	0
2487	0.008664	0	2487	0.008789	0	2487	0.008655	0	2487	0.009129	0	2487	0.008563	0	2487	0.00853	0	2487	0.008774	0	2487	0.008404	0
2492	0.008692	0	2492	0.008817	0	2492	0.008682	0	2492	0.009158	0	2492	0.008591	0	2492	0.008557	0	2492	0.008802	0	2492	0.008431	0
2497	0.008719	0	2497	0.008846	0	2497	0.00871	0	2497	0.009186	0	2497	0.008618	0	2497	0.008585	0	2497	0.00883	0	2497	0.008458	0
2502	0.008747	0	2502	0.008874	0	2502	0.008738	0	2502	0.009214	0	2502	0.008646	0	2502	0.008612	0	2502	0.008858	0	2502	0.008485	0
2507	0.008774	0	2507	0.008902	0	2507	0.008766	0	2507	0.009243	0	2507	0.008674	0	2507	0.00864	0	2507	0.008886	0	2507	0.008512	0
2512	0.008801	0	2512	0.00893	0	2512	0.008794	0	2512	0.009271	0	2512	0.008701	0	2512	0.008667	0	2512	0.008914	0	2512	0.008539	0
2517	0.008829	0	2517	0.008959	0	2517	0.008822	0	2517	0.009299	0	2517	0.008729	0	2517	0.008695	0	2517	0.008943	0	2517	0.008567	0
2522	0.008857	0	2522	0.008987	0	2522	0.00885	0	2522	0.009328	0	2522	0.008757	0	2522	0.008723	0	2522	0.008971	0	2522	0.008594	0
2527	0.008884	0	2527	0.009016	0	2527	0.008878	0	2527	0.009356	0	2527	0.008785	0	2527	0.00875	0	2527	0.008999	0	2527	0.008621	0
2532	0.008912	0	2532	0.009044	0	2532	0.008906	0	2532	0.009385	0	2532	0.008812	0	2532	0.008778	0	2532	0.009027	0	2532	0.008649	0
2537	0.00894	0	2537	0.009072	0	2537	0.008934	0	2537	0.009414	0	2537	0.00884	0	2537	0.008806	0	2537	0.009056	0	2537	0.008676	0
2542	0.008967	0	2542	0.009101	0	2542	0.008963	0	2542	0.009442	0	2542	0.008868	0	2542	0.008834	0	2542	0.009084	0	2542	0.008703	0
2547	0.008995	0	2547	0.00913	0	2547	0.008991	0	2547	0.009471	0	2547	0.008896	0	2547	0.008862	0	2547	0.009113	0	2547	0.008731	0
2552	0.009023	0	2552	0.009158	0	2552	0.009019	0	2552	0.0095	0	2552	0.008924	0	2552	0.00889	0	2552	0.009141	0	2552	0.008758	0
2557	0.009051	0	2557	0.009187	0	2557	0.009047	0	2557	0.009529	0	2557	0.008952	0	2557	0.008918	0	2557	0.00917	0	2557	0.008786	0
2562	0.009079	0	2562	0.009216	0	2562	0.009076	0	2562	0.009557	0	2562	0.00898	0	2562	0.008946	0	2562	0.009198	0	2562	0.008814	0
2567	0.009107	0	2567	0.009244	0	2567	0.009104	0	2567	0.009586	0	2567	0.009009	0	2567	0.008974	0	2567	0.009227	0	2567	0.008841	0
2572	0.009135	0	2572	0.009273	0	2572	0.009133	0	2572	0.009615	0	2572	0.009037	0	2572	0.009002	0	2572	0.009255	0	2572	0.008869	0
2577	0.009163	0	2577	0.009302	0	2577	0.009161	0	2577	0.009644	0	2577	0.009065	0	2577	0.00903	0	2577	0.009284	0	2577	0.008897	0
2582	0.009191	0	2582	0.009331	0	2582	0.00919	0	2582	0.009673	0	2582	0.009093	0	2582	0.009058	0	2582	0.009313	0	2582	0.008924	0
2587	0.009219	0	2587	0.00936	0	2587	0.009219	0	2587	0.009702	0	2587	0.009122	0	2587	0.009087	0	2587	0.009342	0	2587	0.008952	0
2592	0.009247	0	2592	0.009389	0	2592	0.009247	0	2592	0.009731	0	2592	0.00915	0	2592	0.009115	0	2592	0.009371	0	2592	0.00898	0
2597	0.009276	0	2597	0.009418	0	2597	0.009276	0	2597	0.00976	0	2597	0.009179	0	2597	0.009143	0	2597	0.009399	0	2597	0.009008	0
2602	0.009304	0	2602	0.009447	0	2602	0.009305	0	2602	0.00979	0	2602	0.009207	0	2602	0.009172	0	2602	0.009428	0	2602	0.009036	0
2607	0.009332	0	2607	0.009476	0	2607	0.009334	0	2607	0.009819	0	2607	0.009235	0	2607	0.0092	0	2607	0.009457	0	2607	0.009064	0
2612	0.00936	0	2612	0.009506	0	2612	0.009362	0	2612	0.009848	0	2612	0.009264	0	2612	0.009229	0	2612	0.009486	0	2612	0.009092	0
2617	0.009389	0	2617	0.009535	0	2617	0.009391	0	2617	0.009878	0	2617	0.009293	0	2617	0.009257	0	2617	0.009515	0	2617	0.00912	0
2622	0.009417	0	2622	0.009564	0	2622	0.00942	0	2622	0.009907	0	2622	0.009321	0	2622	0.009286	0	2622	0.009545	0	2622	0.009148	0
2627	0.009446	0	2627	0.009593	0	2627	0.009449	0	2627	0.009936	0	2627	0.00935	0	2627	0.009314	0	2627	0.009574	0	2627	0.009176	0
2632	0.009474	0	2632	0.009623	0	2632	0.009478	0	2632	0.009966	0	2632	0.009379	0	2632	0.009343	0	2632	0.009603	0	2632	0.009205	0
2637	0.009503	0	2637	0.009652	0	2637	0.009507	0	2637	0.009995	0	2637	0.009407	0	2637	0.009372	0	2637	0.009632	0	2637	0.009233	0
2642	0.009532	0	2642	0.009682	0	2642	0.009536	0	2642	0.010025	0	2642	0.009436	0	2642	0.0094	0	2642	0.009661	0	2642	0.009261	0
2647	0.00956	0	2647	0.009711	0	2647	0.009566	0	2647	0.010054	0	2647	0.009465	0	2647	0.009429	0	2647	0.009691	0	2647	0.00929	0
2652	0.009589	0	2652	0.009741	0	2652	0.009595	0	2652	0.010084	0	2652	0.009494	0	2652	0.009458	0	2652	0.00972	0	2652	0.009318	0
2657	0.009618	0	2657	0.00977	0	2657	0.009624	0	2657	0.010114	0	2657	0.009523	0	2657	0.009487	0	2657	0.00975	0	2657	0.009346	0
2662	0.009646	0	2662	0.0098	0	2662	0.009653	0	2662	0.010143	0	2662	0.009552	0	2662	0.009516	0	2662	0.009779	0	2662	0.009375	0
2667	0.009675	0	2667	0.00983	0	2667	0.009683	0	2667	0.010173	0	2667	0.009581	0	2667	0.009545	0	2667	0.009809	0	2667	0.009403	0
2672	0.009704	0	2672	0.009859	0	2672	0.009712	0	2672	0.010203	0	2672	0.00961	0	2672	0.009574	0	2672	0.009838	0	2672	0.009432	0
2677	0.009733	0	2677	0.009889	0	2677	0.009741	0	2677	0.010233	0	2677	0.009639	0	2677	0.009603	0	2677	0.009868	0	2677	0.009461	0
2682	0.009762	0	2682	0.009919	0	2682	0.009771	0	2682	0.010263	0	2682	0.009668	0	2682	0.009632	0	2682	0.009897	0	2682	0.009489	0
2687	0.009791	0	2687	0.009949	0	2687	0.0098	0	2687	0.010293	0	2687	0.009698	0	2687	0.009661	0	2687	0.009927	0	2687	0.009518	0
2692	0.00982	0	2692	0.009979	0	2692	0.00983	0	2692	0.010323	0	2692	0.009727	0	2692	0.00969	0	2692	0.009957	0	2692	0.009547	0
2697	0.009849	0	2697	0.010009	0	2697	0.00986	0	2697	0.010353	0	2697	0.009756	0	2697	0.00972	0	2697	0.009987	0	2697	0.009575	0
2702	0.009878	0	2702	0.010039	0	2702	0.009889	0	2702	0.010383	0	2702	0.009786	0	2702	0.009749	0	2702	0.010016	0	2702	0.009604	0
2707	0.009907	0	2707	0.010069	0	2707	0.009919	0	2707	0.010413	0	2707	0.009815	0	2707	0.009778	0	2707	0.010046	0	2707	0.009633	0
2712	0.009937	0	2712	0.010099	0	2712	0.009949	0	2712	0.010443	0	2712	0.009844	0	2712	0.009808	0	2712	0.010076	0	2712	0.009662	0
2717	0.009966	0	2717	0.010129	0	2717	0.009978	0	2717	0.010473	0	2717	0.009874	0	2717	0.009837	0	2717	0.010106	0	2717	0.009691	0
2722	0.009995	0	2722	0.010159	0	2722	0.010008	0	2722	0.010503	0	2722	0.009903	0	2722	0.009866	0	2722	0.010136	0	2722	0.00972	0
2727	0.010025	0	2727	0.010189	0	2727	0.010038	0	2727	0.010534	0	2727	0.009933	0	2727	0.009896	0	2727	0.010166	0	2727	0.009749	0
2732	0.010054	0	2732	0.010219	0	2732	0.010068	0	2732	0.010564	0	2732	0.009963	0	2732	0.009926	0	2732	0.010196	0	2732	0.009778	0
2737	0.010083	0	2737	0.01025	0	2737	0.010098	0	2737	0.010594	0	2737	0.009992	0	2737	0.009955	0	2737	0.010226	0	2737	0.009807	0
2742	0.010113	0	2742	0.01028	0	2742	0.010128	0	2742	0.010625	0	2742	0.010022	0	2742	0.009985	0	2742	0.010257	0	2742	0.009836	0
2747	0.010142	0	2747	0.01031	0	2747	0.010158	0	2747	0.010655	0	2747	0.010052	0	2747	0.010014	0	2747	0.010287	0	2747	0.009866	0
2752	0.010172	0	2752	0.010341	0	2752	0.010188	0	2752	0.010686	0	2752	0.010081	0	2752	0.010044	0	2752	0.010317	0	2752	0.009895	0
2757	0.010202	0	2757	0.010371	0	2757	0.010218	0	2757	0.010716	0	2757	0.010111	0	2757	0.010074	0	2757	0.010347	0	2757	0.009924	0
2762	0.010231	0	2762	0.010402	0	2762	0.010248	0	2762	0.010747	0	2762	0.010141	0	2762	0.010104	0	2762	0.010378	0	2762	0.009953	0
2767	0.010261	0	2767	0.010433	0	2767	0.010279	0	2767	0.010777	0	2767	0.010171	0	2767	0.010134	0	2767	0.010408	0	2767	0.009983	0
2772	0.010291	0	2772	0.010463	0	2772	0.010309	0	2772	0.010808	0	2772	0.010201	0	2772	0.010163	0	2772	0.010439	0	2772	0.010012	0
2777	0.01032	0	2777	0.010494	0	2777	0.010339	0	2777	0.010839	0	2777	0.010231	0	2777	0.010193	0	2777	0.010469	0	2777	0.010042	0
2782	0.01035	0	2782	0.010525	0	2782	0.01037	0	2782	0.010869	0	2782	0.010261	0	2782	0.010223	0	2782	0.0105	0	2782	0.010071	0
2787	0.01038	0	2787	0.010555	0	2787	0.0104	0	2787	0.0109	0	2787	0.010291	0	2787	0.010253	0	2787	0.01053	0	2787	0.010101	0
2792	0.01041	0	2792	0.010586	0	2792	0.01043	0	2792	0.010931	0	2792	0.010321	0	2792	0.010283	0	2792	0.010561	0	2792	0.01013	0
2797	0.01044	0	2797	0.010617	0	2797	0.010461	0	2797	0.010962	0	2797	0.010352	0	2797	0.010314	0	2797	0.010591	0	2797	0.01016	0
2802	0.01047	0	2802	0.010648	0	2802	0.010491	0	2802	0.010993	0	2802	0.010382	0	2802	0.010344	0	2802	0.010622	0	2802	0.01019	0
2807	0.0105	0	2807	0.010679	0	2807	0.010522	0	2807	0.011024	0	2807	0.010412	0	2807	0.010374	0	2807	0.010653	0	2807	0.010219	0
2812	0.01053	0	2812	0.01071	0	2812	0.010553	0	2812	0.011055	0	2812	0.010442	0	2812	0.010404	0	2812	0.010684	0	2812	0.010249	0
2817	0.01056	0	2817	0.010741	0	2817	0.010583	0	2817	0.011086	0	2817	0.010473	0	2817	0.010434	0	2817	0.010715	0	2817	0.010279	0
2822	0.01059	0	2822	0.010772	0	2822	0.010614	0	2822	0.011117	0	2822	0.010503	0	2822	0.010465	0	2822	0.010745	0	2822	0.010309	0
2827	0.010621	0	2827	0.010803	0	2827	0.010645	0	2827	0.011148	0	2827	0.010534	0	2827	0.010495	0	2827	0.010776	0	2827	0.010339	0
2832	0.010651	0	2832	0.010834	0	2832	0.010676	0	2832	0.011179	0	2832	0.010564	0	2832	0.010526	0	2832	0.010807	0	2832	0.010369	0
2837	0.010681	0	2837	0.010865	0	2837	0.010706	0	2837	0.011211	0	2837	0.010595	0	2837	0.010556	0	2837	0.010838	0	2837	0.010399	0
2842	0.010711	0	2842	0.010897	0	2842	0.010737	0	2842	0.011242	0	2842	0.010625	0	2842	0.010587	0	2842	0.010869	0	2842	0.010429	0
2847	0.010742	0	2847	0.010928	0	2847	0.010768	0	2847	0.011273	0	2847	0.010656	0	2847	0.010617	0	2847	0.010901	0	2847	0.010459	0
2852	0.010772	0	2852	0.010959	0	2852	0.010799	0	2852	0.011305	0	2852	0.010687	0	2852	0.010648	0	2852	0.010932	0	2852	0.010489	0
2857	0.010803	0	2857	0.010991	0	2857	0.01083	0	2857	0.011336	0	2857	0.010717	0	2857	0.010678	0	2857	0.010963	0	2857	0.010519	0
2862	0.010833	0	2862	0.011022	0	2862	0.010861	0	2862	0.011368	0	2862	0.010748	0	2862	0.010709	0	2862	0.010994	0	2862	0.010549	0
2867	0.010864	0	2867	0.011053	0	2867	0.010892	0	2867	0.011399	0	2867	0.010779	0	2867	0.01074	0	2867	0.011025	0	2867	0.01058	0
2872	0.010894	0	2872	0.011085	0	2872	0.010924	0	2872	0.011431	0	2872	0.01081	0	2872	0.010771	0	2872	0.011057	0	2872	0.01061	0
2877	0.010925	0	2877	0.011117	0	2877	0.010955	0	2877	0.011462	0	2877	0.010841	0	2877	0.010801	0	2877	0.011088	0	2877	0.01064	0
2882	0.010956	0	2882	0.011148	0	2882	0.010986	0	2882	0.011494	0	2882	0.010871	0	2882	0.010832	0	2882	0.01112	0	2882	0.010671	0
2887	0.010986	0	2887	0.01118	0	2887	0.011017	0	2887	0.011525	0	2887	0.010902	0	2887	0.010863	0	2887	0.011151	0	2887	0.010701	0
2892	0.011017	0	2892	0.011211	0	2892	0.011049	0	2892	0.011557	0	2892	0.010933	0	2892	0.010894	0	2892	0.011183	0	2892	0.010732	0
2897	0.011048	0	2897	0.011243	0	2897	0.01108	0	2897	0.011589	0	2897	0.010965	0	2897	0.010925	0	2897	0.011214	0	2897	0.010762	0
2902	0.011079	0	2902	0.011275	0	2902	0.011112	0	2902	0.011621	0	2902	0.010996	0	2902	0.010956	0	2902	0.011246	0	2902	0.010793	0
2907	0.01111	0	2907	0.011307	0	2907	0.011143	0	2907	0.011653	0	2907	0.011027	0	2907	0.010987	0	2907	0.011277	0	2907	0.010823	0
2912	0.011141	0	2912	0.011339	0	2912	0.011175	0	2912	0.011684	0	2912	0.011058	0	2912	0.011018	0	2912	0.011309	0	2912	0.010854	0
2917	0.011172	0	2917	0.011371	0	2917	0.011206	0	2917	0.011716	0	2917	0.011089	0	2917	0.01105	0	2917	0.011341	0	2917	0.010885	0
2922	0.011203	0	2922	0.011403	0	2922	0.011238	0	2922	0.011748	0	2922	0.011121	0	2922	0.011081	0	2922	0.011373	0	2922	0.010915	0
2927	0.011234	0	2927	0.011435	0	2927	0.011269	0	2927	0.01178	0	2927	0.011152	0	2927	0.011112	0	2927	0.011404	0	2927	0.010946	0
2932	0.011265	0	2932	0.011467	0	2932	0.011301	0	2932	0.011812	0	2932	0.011183	0	2932	0.011143	0	2932	0.011436	0	2932	0.010977	0
2937	0.011296	0	2937	0.011499	0	2937	0.011333	0	2937	0.011845	0	2937	0.011215	0	2937	0.011175	0	2937	0.011468	0	2937	0.011008	0
2942	0.011327	0	2942	0.011531	0	2942	0.011365	0	2942	0.011877	0	2942	0.011246	0	2942	0.011206	0	2942	0.0115	0	2942	0.011039	0
2947	0.011358	0	2947	0.011563	0	2947	0.011396	0	2947	0.011909	0	2947	0.011278	0	2947	0.011238	0	2947	0.011532	0	2947	0.01107	0
2952	0.01139	0	2952	0.011595	0	2952	0.011428	0	2952	0.011941	0	2952	0.011309	0	2952	0.011269	0	2952	0.011564	0	2952	0.011101	0
2957	0.011421	0	2957	0.011628	0	2957	0.01146	0	2957	0.011973	0	2957	0.011341	0	2957	0.011301	0	2957	0.011596	0	2957	0.011132	0
2962	0.011452	0	2962	0.01166	0	2962	0.011492	0	2962	0.012006	0	2962	0.011372	0	2962	0.011332	0	2962	0.011628	0	2962	0.011163	0
2967	0.011484	0	2967	0.011692	0	2967	0.011524	0	2967	0.012038	0	2967	0.011404	0	2967	0.011364	0	2967	0.011661	0	2967	0.011194	0
2972	0.011515	0	2972	0.011725	0	2972	0.011556	0	2972	0.012071	0	2972	0.011436	0	2972	0.011395	0	2972	0.011693	0	2972	0.011225	0
2977	0.011547	0	2977	0.011757	0	2977	0.011588	0	2977	0.012103	0	2977	0.011468	0	2977	0.011427	0	2977	0.011725	0	2977	0.011256	0
2982	0.011578	0	2982	0.01179	0	2982	0.01162	0	2982	0.012135	0	2982	0.011499	0	2982	0.011459	0	2982	0.011757	0	2982	0.011287	0
2987	0.01161	0	2987	0.011822	0	2987	0.011653	0	2987	0.012168	0	2987	0.011531	0	2987	0.011491	0	2987	0.01179	0	2987	0.011319	0
2992	0.011642	0	2992	0.011855	0	2992	0.011685	0	2992	0.012201	0	2992	0.011563	0	2992	0.011522	0	2992	0.011822	0	2992	0.01135	0
2997	0.011673	0	2997	0.011887	0	2997	0.011717	0	2997	0.012233	0	2997	0.011595	0	2997	0.011554	0	2997	0.011855	0	2997	0.011381	0
3002	0.011705	0	3002	0.01192	0	3002	0.011749	0	3002	0.012266	0	3002	0.011627	0	3002	0.011586	0	3002	0.011887	0	3002	0.011413	0
3007	0.011737	0	3007	0.011953	0	3007	0.011782	0	3007	0.012299	0	3007	0.011659	0	3007	0.011618	0	3007	0.01192	0	3007	0.011444	0
3012	0.011768	0	3012	0.011986	0	3012	0.011814	0	3012	0.012331	0	3012	0.011691	0	3012	0.01165	0	3012	0.011952	0	3012	0.011476	0
3017	0.0118	0	3017	0.012018	0	3017	0.011847	0	3017	0.012364	0	3017	0.011723	0	3017	0.011682	0	3017	0.011985	0	3017	0.011507	0
3022	0.011832	0	3022	0.012051	0	3022	0.011879	0	3022	0.012397	0	3022	0.011756	0	3022	0.011714	0	3022	0.012017	0	3022	0.011539	0
3027	0.011864	0	3027	0.012084	0	3027	0.011912	0	3027	0.01243	0	3027	0.011788	0	3027	0.011747	0	3027	0.01205	0	3027	0.011571	0
3032	0.011896	0	3032	0.012117	0	3032	0.011944	0	3032	0.012463	0	3032	0.01182	0	3032	0.011779	0	3032	0.012083	0	3032	0.011602	0
3037	0.011928	0	3037	0.01215	0	3037	0.011977	0	3037	0.012496	0	3037	0.011852	0	3037	0.011811	0	3037	0.012116	0	3037	0.011634	0
3042	0.01196	0	3042	0.012183	0	3042	0.01201	0	3042	0.012529	0	3042	0.011885	0	3042	0.011843	0	3042	0.012149	0	3042	0.011666	0
3047	0.011992	0	3047	0.012216	0	3047	0.012042	0	3047	0.012562	0	3047	0.011917	0	3047	0.011876	0	3047	0.012181	0	3047	0.011698	0
3052	0.012024	0	3052	0.012249	0	3052	0.012075	0	3052	0.012595	0	3052	0.01195	0	3052	0.011908	0	3052	0.012214	0	3052	0.011729	0
3057	0.012057	0	3057	0.012283	0	3057	0.012108	0	3057	0.012628	0	3057	0.011982	0	3057	0.01194	0	3057	0.012247	0	3057	0.011761	0
3062	0.012089	0	3062	0.012316	0	3062	0.012141	0	3062	0.012661	0	3062	0.012015	0	3062	0.011973	0	3062	0.01228	0	3062	0.011793	0
3067	0.012121	0	3067	0.012349	0	3067	0.012174	0	3067	0.012695	0	3067	0.012047	0	3067	0.012005	0	3067	0.012313	0	3067	0.011825	0
3072	0.012153	0	3072	0.012382	0	3072	0.012207	0	3072	0.012728	0	3072	0.01208	0	3072	0.012038	0	3072	0.012347	0	3072	0.011857	0
3077	0.012186	0	3077	0.012416	0	3077	0.01224	0	3077	0.012761	0	3077	0.012112	0	3077	0.01207	0	3077	0.01238	0	3077	0.011889	0
3082	0.012218	0	3082	0.012449	0	3082	0.012273	0	3082	0.012795	0	3082	0.012145	0	3082	0.012103	0	3082	0.012413	0	3082	0.011921	0
3087	0.012251	0	3087	0.012483	0	3087	0.012306	0	3087	0.012828	0	3087	0.012178	0	3087	0.012136	0	3087	0.012446	0	3087	0.011954	0
3092	0.012283	0	3092	0.012516	0	3092	0.012339	0	3092	0.012862	0	3092	0.012211	0	3092	0.012168	0	3092	0.012479	0	3092	0.011986	0
3097	0.012316	0	3097	0.01255	0	3097	0.012372	0	3097	0.012895	0	3097	0.012243	0	3097	0.012201	0	3097	0.012513	0	3097	0.012018	0
3102	0.012348	0	3102	0.012583	0	3102	0.012405	0	3102	0.012929	0	3102	0.012276	0	3102	0.012234	0	3102	0.012546	0	3102	0.01205	0
3107	0.012381	0	3107	0.012617	0	3107	0.012438	0	3107	0.012962	0	3107	0.012309	0	3107	0.012267	0	3107	0.01258	0	3107	0.012083	0
3112	0.012414	0	3112	0.012651	0	3112	0.012472	0	3112	0.012996	0	3112	0.012342	0	3112	0.0123	0	3112	0.012613	0	3112	0.012115	0
3117	0.012446	0	3117	0.012684	0	3117	0.012505	0	3117	0.013029	0	3117	0.012375	0	3117	0.012333	0	3117	0.012647	0	3117	0.012147	0
3122	0.012479	0	3122	0.012718	0	3122	0.012538	0	3122	0.013063	0	3122	0.012408	0	3122	0.012366	0	3122	0.01268	0	3122	0.01218	0
3127	0.012512	0	3127	0.012752	0	3127	0.012572	0	3127	0.013097	0	3127	0.012441	0	3127	0.012399	0	3127	0.012714	0	3127	0.012212	0
3132	0.012545	0	3132	0.012786	0	3132	0.012605	0	3132	0.013131	0	3132	0.012474	0	3132	0.012432	0	3132	0.012747	0	3132	0.012245	0
3137	0.012577	0	3137	0.01282	0	3137	0.012639	0	3137	0.013165	0	3137	0.012508	0	3137	0.012465	0	3137	0.012781	0	3137	0.012278	0
3142	0.01261	0	3142	0.012854	0	3142	0.012672	0	3142	0.013199	0	3142	0.012541	0	3142	0.012498	0	3142	0.012815	0	3142	0.01231	0
3147	0.012643	0	3147	0.012888	0	3147	0.012706	0	3147	0.013232	0	3147	0.012574	0	3147	0.012531	0	3147	0.012849	0	3147	0.012343	0
3152	0.012676	0	3152	0.012922	0	3152	0.01274	0	3152	0.013266	0	3152	0.012607	0	3152	0.012564	0	3152	0.012882	0	3152	0.012376	0
3157	0.012709	0	3157	0.012956	0	3157	0.012773	0	3157	0.0133	0	3157	0.012641	0	3157	0.012598	0	3157	0.012916	0	3157	0.012408	0
3162	0.012742	0	3162	0.01299	0	3162	0.012807	0	3162	0.013335	0	3162	0.012674	0	3162	0.012631	0	3162	0.01295	0	3162	0.012441	0
3167	0.012776	0	3167	0.013024	0	3167	0.012841	0	3167	0.013369	0	3167	0.012708	0	3167	0.012664	0	3167	0.012984	0	3167	0.012474	0
3172	0.012809	0	3172	0.013058	0	3172	0.012875	0	3172	0.013403	0	3172	0.012741	0	3172	0.012698	0	3172	0.013018	0	3172	0.012507	0
3177	0.012842	0	3177	0.013092	0	3177	0.012909	0	3177	0.013437	0	3177	0.012775	0	3177	0.012731	0	3177	0.013052	0	3177	0.01254	0
3182	0.012875	0	3182	0.013127	0	3182	0.012942	0	3182	0.013471	0	3182	0.012808	0	3182	0.012765	0	3182	0.013086	0	3182	0.012573	0
3187	0.012909	0	3187	0.013161	0	3187	0.012976	0	3187	0.013506	0	3187	0.012842	0	3187	0.012798	0	3187	0.01312	0	3187	0.012606	0
3192	0.012942	0	3192	0.013195	0	3192	0.01301	0	3192	0.01354	0	3192	0.012876	0	3192	0.012832	0	3192	0.013155	0	3192	0.012639	0
3197	0.012975	0	3197	0.01323	0	3197	0.013045	0	3197	0.013574	0	3197	0.012909	0	3197	0.012866	0	3197	0.013189	0	3197	0.012672	0
3202	0.013009	0	3202	0.013264	0	3202	0.013079	0	3202	0.013609	0	3202	0.012943	0	3202	0.012899	0	3202	0.013223	0	3202	0.012705	0
3207	0.013042	0	3207	0.013299	0	3207	0.013113	0	3207	0.013643	0	3207	0.012977	0	3207	0.012933	0	3207	0.013257	0	3207	0.012738	0
3212	0.013076	0	3212	0.013333	0	3212	0.013147	0	3212	0.013678	0	3212	0.013011	0	3212	0.012967	0	3212	0.013292	0	3212	0.012772	0
3217	0.013109	0	3217	0.013368	0	3217	0.013181	0	3217	0.013712	0	3217	0.013045	0	3217	0.013001	0	3217	0.013326	0	3217	0.012805	0
3222	0.013143	0	3222	0.013403	0	3222	0.013215	0	3222	0.013747	0	3222	0.013079	0	3222	0.013034	0	3222	0.013361	0	3222	0.012838	0
3227	0.013177	0	3227	0.013437	0	3227	0.01325	0	3227	0.013781	0	3227	0.013112	0	3227	0.013068	0	3227	0.013395	0	3227	0.012872	0
3232	0.01321	0	3232	0.013472	0	3232	0.013284	0	3232	0.013816	0	3232	0.013147	0	3232	0.013102	0	3232	0.01343	0	3232	0.012905	0
3237	0.013244	0	3237	0.013507	0	3237	0.013319	0	3237	0.013851	0	3237	0.013181	0	3237	0.013136	0	3237	0.013464	0	3237	0.012938	0
3242	0.013278	0	3242	0.013542	0	3242	0.013353	0	3242	0.013886	0	3242	0.013215	0	3242	0.01317	0	3242	0.013499	0	3242	0.012972	0
3247	0.013312	0	3247	0.013577	0	3247	0.013388	0	3247	0.01392	0	3247	0.013249	0	3247	0.013204	0	3247	0.013533	0	3247	0.013006	0
3252	0.013345	0	3252	0.013612	0	3252	0.013422	0	3252	0.013955	0	3252	0.013283	0	3252	0.013238	0	3252	0.013568	0	3252	0.013039	0
3257	0.013379	0	3257	0.013647	0	3257	0.013457	0	3257	0.01399	0	3257	0.013317	0	3257	0.013273	0	3257	0.013603	0	3257	0.013073	0
3262	0.013413	0	3262	0.013682	0	3262	0.013491	0	3262	0.014025	0	3262	0.013352	0	3262	0.013307	0	3262	0.013638	0	3262	0.013106	0
3267	0.013447	0	3267	0.013717	0	3267	0.013526	0	3267	0.01406	0	3267	0.013386	0	3267	0.013341	0	3267	0.013673	0	3267	0.01314	0
3272	0.013481	0	3272	0.013752	0	3272	0.013561	0	3272	0.014095	0	3272	0.01342	0	3272	0.013375	0	3272	0.013707	0	3272	0.013174	0
3277	0.013515	0	3277	0.013787	0	3277	0.013595	0	3277	0.01413	0	3277	0.013455	0	3277	0.01341	0	3277	0.013742	0	3277	0.013208	0
3282	0.01355	0	3282	0.013822	0	3282	0.01363	0	3282	0.014165	0	3282	0.013489	0	3282	0.013444	0	3282	0.013777	0	3282	0.013242	0
3287	0.013584	0	3287	0.013857	0	3287	0.013665	0	3287	0.0142	0	3287	0.013524	0	3287	0.013479	0	3287	0.013812	0	3287	0.013275	0
3292	0.013618	0	3292	0.013893	0	3292	0.0137	0	3292	0.014236	0	3292	0.013558	0	3292	0.013513	0	3292	0.013847	0	3292	0.013309	0
3297	0.013652	0	3297	0.013928	0	3297	0.013735	0	3297	0.014271	0	3297	0.013593	0	3297	0.013548	0	3297	0.013883	0	3297	0.013343	0
3302	0.013686	0	3302	0.013963	0	3302	0.01377	0	3302	0.014306	0	3302	0.013627	0	3302	0.013582	0	3302	0.013918	0	3302	0.013377	0
3307	0.013721	0	3307	0.013999	0	3307	0.013805	0	3307	0.014341	0	3307	0.013662	0	3307	0.013617	0	3307	0.013953	0	3307	0.013411	0
3312	0.013755	0	3312	0.014034	0	3312	0.01384	0	3312	0.014377	0	3312	0.013697	0	3312	0.013651	0	3312	0.013988	0	3312	0.013446	0
3317	0.01379	0	3317	0.01407	0	3317	0.013875	0	3317	0.014412	0	3317	0.013732	0	3317	0.013686	0	3317	0.014024	0	3317	0.01348	0
3322	0.013824	0	3322	0.014105	0	3322	0.01391	0	3322	0.014448	0	3322	0.013766	0	3322	0.013721	0	3322	0.014059	0	3322	0.013514	0
3327	0.013859	0	3327	0.014141	0	3327	0.013946	0	3327	0.014483	0	3327	0.013801	0	3327	0.013756	0	3327	0.014094	0	3327	0.013548	0
3332	0.013893	0	3332	0.014177	0	3332	0.013981	0	3332	0.014519	0	3332	0.013836	0	3332	0.01379	0	3332	0.01413	0	3332	0.013582	0
3337	0.013928	0	3337	0.014212	0	3337	0.014016	0	3337	0.014554	0	3337	0.013871	0	3337	0.013825	0	3337	0.014165	0	3337	0.013617	0
3342	0.013962	0	3342	0.014248	0	3342	0.014051	0	3342	0.01459	0	3342	0.013906	0	3342	0.01386	0	3342	0.014201	0	3342	0.013651	0
3347	0.013997	0	3347	0.014284	0	3347	0.014087	0	3347	0.014626	0	3347	0.013941	0	3347	0.013895	0	3347	0.014236	0	3347	0.013685	0
3352	0.014032	0	3352	0.01432	0	3352	0.014122	0	3352	0.014661	0	3352	0.013976	0	3352	0.01393	0	3352	0.014272	0	3352	0.01372	0
3357	0.014067	0	3357	0.014355	0	3357	0.014158	0	3357	0.014697	0	3357	0.014011	0	3357	0.013965	0	3357	0.014307	0	3357	0.013754	0
3362	0.014101	0	3362	0.014391	0	3362	0.014193	0	3362	0.014733	0	3362	0.014047	0	3362	0.014	0	3362	0.014343	0	3362	0.013789	0
3367	0.014136	0	3367	0.014427	0	3367	0.014229	0	3367	0.014769	0	3367	0.014082	0	3367	0.014035	0	3367	0.014379	0	3367	0.013824	0
3372	0.014171	0	3372	0.014463	0	3372	0.014264	0	3372	0.014805	0	3372	0.014117	0	3372	0.014071	0	3372	0.014415	0	3372	0.013858	0
3377	0.014206	0	3377	0.014499	0	3377	0.0143	0	3377	0.014841	0	3377	0.014152	0	3377	0.014106	0	3377	0.01445	0	3377	0.013893	0
3382	0.014241	0	3382	0.014535	0	3382	0.014336	0	3382	0.014877	0	3382	0.014188	0	3382	0.014141	0	3382	0.014486	0	3382	0.013928	0
3387	0.014276	0	3387	0.014572	0	3387	0.014372	0	3387	0.014913	0	3387	0.014223	0	3387	0.014176	0	3387	0.014522	0	3387	0.013962	0
3392	0.014311	0	3392	0.014608	0	3392	0.014407	0	3392	0.014949	0	3392	0.014258	0	3392	0.014212	0	3392	0.014558	0	3392	0.013997	0
3397	0.014346	0	3397	0.014644	0	3397	0.014443	0	3397	0.014985	0	3397	0.014294	0	3397	0.014247	0	3397	0.014594	0	3397	0.014032	0
3402	0.014381	0	3402	0.01468	0	3402	0.014479	0	3402	0.015021	0	3402	0.014329	0	3402	0.014283	0	3402	0.01463	0	3402	0.014067	0
3407	0.014417	0	3407	0.014717	0	3407	0.014515	0	3407	0.015057	0	3407	0.014365	0	3407	0.014318	0	3407	0.014666	0	3407	0.014102	0
3412	0.014452	0	3412	0.014753	0	3412	0.014551	0	3412	0.015094	0	3412	0.014401	0	3412	0.014354	0	3412	0.014702	0	3412	0.014137	0
3417	0.014487	0	3417	0.014789	0	3417	0.014587	0	3417	0.01513	0	3417	0.014436	0	3417	0.014389	0	3417	0.014739	0	3417	0.014172	0
3422	0.014522	0	3422	0.014826	0	3422	0.014623	0	3422	0.015166	0	3422	0.014472	0	3422	0.014425	0	3422	0.014775	0	3422	0.014207	0
3427	0.014558	0	3427	0.014862	0	3427	0.014659	0	3427	0.015203	0	3427	0.014508	0	3427	0.014461	0	3427	0.014811	0	3427	0.014242	0
3432	0.014593	0	3432	0.014899	0	3432	0.014695	0	3432	0.015239	0	3432	0.014543	0	3432	0.014496	0	3432	0.014847	0	3432	0.014277	0
3437	0.014629	0	3437	0.014935	0	3437	0.014731	0	3437	0.015275	0	3437	0.014579	0	3437	0.014532	0	3437	0.014884	0	3437	0.014312	0
3442	0.014664	0	3442	0.014972	0	3442	0.014768	0	3442	0.015312	0	3442	0.014615	0	3442	0.014568	0	3442	0.01492	0	3442	0.014348	0
3447	0.0147	0	3447	0.015009	0	3447	0.014804	0	3447	0.015348	0	3447	0.014651	0	3447	0.014604	0	3447	0.014957	0	3447	0.014383	0
3452	0.014735	0	3452	0.015046	0	3452	0.01484	0	3452	0.015385	0	3452	0.014687	0	3452	0.014639	0	3452	0.014993	0	3452	0.014418	0
3457	0.014771	0	3457	0.015082	0	3457	0.014877	0	3457	0.015422	0	3457	0.014723	0	3457	0.014675	0	3457	0.01503	0	3457	0.014453	0
3462	0.014807	0	3462	0.015119	0	3462	0.014913	0	3462	0.015458	0	3462	0.014759	0	3462	0.014711	0	3462	0.015066	0	3462	0.014489	0
3467	0.014842	0	3467	0.015156	0	3467	0.014949	0	3467	0.015495	0	3467	0.014795	0	3467	0.014747	0	3467	0.015103	0	3467	0.014524	0
3472	0.014878	0	3472	0.015193	0	3472	0.014986	0	3472	0.015532	0	3472	0.014831	0	3472	0.014783	0	3472	0.01514	0	3472	0.01456	0
3477	0.014914	0	3477	0.01523	0	3477	0.015023	0	3477	0.015569	0	3477	0.014868	0	3477	0.01482	0	3477	0.015176	0	3477	0.014595	0
3482	0.01495	0	3482	0.015267	0	3482	0.015059	0	3482	0.015606	0	3482	0.014904	0	3482	0.014856	0	3482	0.015213	0	3482	0.014631	0
3487	0.014986	0	3487	0.015304	0	3487	0.015096	0	3487	0.015642	0	3487	0.01494	0	3487	0.014892	0	3487	0.01525	0	3487	0.014667	0
3492	0.015022	0	3492	0.015341	0	3492	0.015132	0	3492	0.015679	0	3492	0.014976	0	3492	0.014928	0	3492	0.015287	0	3492	0.014702	0
3497	0.015058	0	3497	0.015378	0	3497	0.015169	0	3497	0.015716	0	3497	0.015013	0	3497	0.014964	0	3497	0.015324	0	3497	0.014738	0
3502	0.015094	0	3502	0.015415	0	3502	0.015206	0	3502	0.015753	0	3502	0.015049	0	3502	0.015001	0	3502	0.015361	0	3502	0.014774	0
3507	0.01513	0	3507	0.015452	0	3507	0.015243	0	3507	0.015791	0	3507	0.015086	0	3507	0.015037	0	3507	0.015397	0	3507	0.014809	0
3512	0.015166	0	3512	0.01549	0	3512	0.01528	0	3512	0.015828	0	3512	0.015122	0	3512	0.015074	0	3512	0.015435	0	3512	0.014845	0
3517	0.015202	0	3517	0.015527	0	3517	0.015316	0	3517	0.015865	0	3517	0.015159	0	3517	0.01511	0	3517	0.015472	0	3517	0.014881	0
3522	0.015238	0	3522	0.015564	0	3522	0.015353	0	3522	0.015902	0	3522	0.015195	0	3522	0.015146	0	3522	0.015509	0	3522	0.014917	0
3527	0.015274	0	3527	0.015602	0	3527	0.01539	0	3527	0.015939	0	3527	0.015232	0	3527	0.015183	0	3527	0.015546	0	3527	0.014953	0
3532	0.015311	0	3532	0.015639	0	3532	0.015427	0	3532	0.015977	0	3532	0.015268	0	3532	0.01522	0	3532	0.015583	0	3532	0.014989	0
3537	0.015347	0	3537	0.015677	0	3537	0.015465	0	3537	0.016014	0	3537	0.015305	0	3537	0.015256	0	3537	0.01562	0	3537	0.015025	0
3542	0.015383	0	3542	0.015714	0	3542	0.015502	0	3542	0.016051	0	3542	0.015342	0	3542	0.015293	0	3542	0.015658	0	3542	0.015061	0
3547	0.01542	0	3547	0.015752	0	3547	0.015539	0	3547	0.016089	0	3547	0.015379	0	3547	0.01533	0	3547	0.015695	0	3547	0.015097	0
3552	0.015456	0	3552	0.015789	0	3552	0.015576	0	3552	0.016126	0	3552	0.015416	0	3552	0.015366	0	3552	0.015732	0	3552	0.015134	0
3557	0.015493	0	3557	0.015827	0	3557	0.015613	0	3557	0.016164	0	3557	0.015452	0	3557	0.015403	0	3557	0.01577	0	3557	0.01517	0
3562	0.015529	0	3562	0.015865	0	3562	0.015651	0	3562	0.016201	0	3562	0.015489	0	3562	0.01544	0	3562	0.015807	0	3562	0.015206	0
3567	0.015566	0	3567	0.015903	0	3567	0.015688	0	3567	0.016239	0	3567	0.015526	0	3567	0.015477	0	3567	0.015845	0	3567	0.015242	0
3572	0.015602	0	3572	0.01594	0	3572	0.015725	0	3572	0.016276	0	3572	0.015563	0	3572	0.015514	0	3572	0.015882	0	3572	0.015279	0
3577	0.015639	0	3577	0.015978	0	3577	0.015763	0	3577	0.016314	0	3577	0.0156	0	3577	0.015551	0	3577	0.01592	0	3577	0.015315	0
3582	0.015676	0	3582	0.016016	0	3582	0.0158	0	3582	0.016352	0	3582	0.015638	0	3582	0.015588	0	3582	0.015958	0	3582	0.015352	0
3587	0.015712	0	3587	0.016054	0	3587	0.015838	0	3587	0.01639	0	3587	0.015675	0	3587	0.015625	0	3587	0.015995	0	3587	0.015388	0
3592	0.015749	0	3592	0.016092	0	3592	0.015875	0	3592	0.016427	0	3592	0.015712	0	3592	0.015662	0	3592	0.016033	0	3592	0.015425	0
3597	0.015786	0	3597	0.01613	0	3597	0.015913	0	3597	0.016465	0	3597	0.015749	0	3597	0.015699	0	3597	0.016071	0	3597	0.015461	0
3602	0.015823	0	3602	0.016168	0	3602	0.015951	0	3602	0.016503	0	3602	0.015786	0	3602	0.015736	0	3602	0.016109	0	3602	0.015498	0
3607	0.01586	0	3607	0.016206	0	3607	0.015988	0	3607	0.016541	0	3607	0.015824	0	3607	0.015774	0	3607	0.016146	0	3607	0.015535	0
3612	0.015897	0	3612	0.016244	0	3612	0.016026	0	3612	0.016579	0	3612	0.015861	0	3612	0.015811	0	3612	0.016184	0	3612	0.015571	0
3617	0.015934	0	3617	0.016283	0	3617	0.016064	0	3617	0.016617	0	3617	0.015898	0	3617	0.015848	0	3617	0.016222	0	3617	0.015608	0
3622	0.015971	0	3622	0.016321	0	3622	0.016102	0	3622	0.016655	0	3622	0.015936	0	3622	0.015886	0	3622	0.01626	0	3622	0.015645	0
3627	0.016008	0	3627	0.016359	0	3627	0.01614	0	3627	0.016693	0	3627	0.015973	0	3627	0.015923	0	3627	0.016298	0	3627	0.015682	0
3632	0.016045	0	3632	0.016397	0	3632	0.016177	0	3632	0.016732	0	3632	0.016011	0	3632	0.015961	0	3632	0.016336	0	3632	0.015718	0
3637	0.016082	0	3637	0.016436	0	3637	0.016215	0	3637	0.01677	0	3637	0.016049	0	3637	0.015998	0	3637	0.016375	0	3637	0.015755	0
3642	0.016119	0	3642	0.016474	0	3642	0.016253	0	3642	0.016808	0	3642	0.016086	0	3642	0.016036	0	3642	0.016413	0	3642	0.015792	0
3647	0.016157	0	3647	0.016513	0	3647	0.016292	0	3647	0.016846	0	3647	0.016124	0	3647	0.016073	0	3647	0.016451	0	3647	0.015829	0
3652	0.016194	0	3652	0.016551	0	3652	0.01633	0	3652	0.016885	0	3652	0.016162	0	3652	0.016111	0	3652	0.016489	0	3652	0.015866	0
3657	0.016231	0	3657	0.01659	0	3657	0.016368	0	3657	0.016923	0	3657	0.016199	0	3657	0.016149	0	3657	0.016528	0	3657	0.015904	0
3662	0.016269	0	3662	0.016628	0	3662	0.016406	0	3662	0.016961	0	3662	0.016237	0	3662	0.016186	0	3662	0.016566	0	3662	0.015941	0
3667	0.016306	0	3667	0.016667	0	3667	0.016444	0	3667	0.017	0	3667	0.016275	0	3667	0.016224	0	3667	0.016604	0	3667	0.015978	0
3672	0.016344	0	3672	0.016706	0	3672	0.016482	0	3672	0.017038	0	3672	0.016313	0	3672	0.016262	0	3672	0.016643	0	3672	0.016015	0
3677	0.016381	0	3677	0.016744	0	3677	0.016521	0	3677	0.017077	0	3677	0.016351	0	3677	0.0163	0	3677	0.016681	0	3677	0.016052	0
3682	0.016419	0	3682	0.016783	0	3682	0.016559	0	3682	0.017116	0	3682	0.016389	0	3682	0.016338	0	3682	0.01672	0	3682	0.01609	0
3687	0.016456	0	3687	0.016822	0	3687	0.016598	0	3687	0.017154	0	3687	0.016427	0	3687	0.016376	0	3687	0.016758	0	3687	0.016127	0
3692	0.016494	0	3692	0.016861	0	3692	0.016636	0	3692	0.017193	0	3692	0.016465	0	3692	0.016414	0	3692	0.016797	0	3692	0.016164	0
3697	0.016532	0	3697	0.0169	0	3697	0.016675	0	3697	0.017232	0	3697	0.016503	0	3697	0.016452	0	3697	0.016836	0	3697	0.016202	0
3702	0.016569	0	3702	0.016939	0	3702	0.016713	0	3702	0.01727	0	3702	0.016541	0	3702	0.01649	0	3702	0.016874	0	3702	0.016239	0
3707	0.016607	0	3707	0.016978	0	3707	0.016752	0	3707	0.017309	0	3707	0.01658	0	3707	0.016528	0	3707	0.016913	0	3707	0.016277	0
3712	0.016645	0	3712	0.017017	0	3712	0.01679	0	3712	0.017348	0	3712	0.016618	0	3712	0.016566	0	3712	0.016952	0	3712	0.016314	0
3717	0.016683	0	3717	0.017056	0	3717	0.016829	0	3717	0.017387	0	3717	0.016656	0	3717	0.016604	0	3717	0.016991	0	3717	0.016352	0
3722	0.016721	0	3722	0.017095	0	3722	0.016868	0	3722	0.017426	0	3722	0.016694	0	3722	0.016643	0	3722	0.01703	0	3722	0.01639	0
3727	0.016759	0	3727	0.017134	0	3727	0.016907	0	3727	0.017465	0	3727	0.016733	0	3727	0.016681	0	3727	0.017069	0	3727	0.016427	0
3732	0.016797	0	3732	0.017174	0	3732	0.016945	0	3732	0.017504	0	3732	0.016771	0	3732	0.016719	0	3732	0.017108	0	3732	0.016465	0
3737	0.016835	0	3737	0.017213	0	3737	0.016984	0	3737	0.017543	0	3737	0.01681	0	3737	0.016758	0	3737	0.017147	0	3737	0.016503	0
3742	0.016873	0	3742	0.017252	0	3742	0.017023	0	3742	0.017582	0	3742	0.016848	0	3742	0.016796	0	3742	0.017186	0	3742	0.016541	0
3747	0.016911	0	3747	0.017292	0	3747	0.017062	0	3747	0.017621	0	3747	0.016887	0	3747	0.016835	0	3747	0.017225	0	3747	0.016579	0
3752	0.016949	0	3752	0.017331	0	3752	0.017101	0	3752	0.017661	0	3752	0.016925	0	3752	0.016873	0	3752	0.017264	0	3752	0.016617	0
3757	0.016987	0	3757	0.01737	0	3757	0.01714	0	3757	0.0177	0	3757	0.016964	0	3757	0.016912	0	3757	0.017303	0	3757	0.016655	0
3762	0.017026	0	3762	0.01741	0	3762	0.017179	0	3762	0.017739	0	3762	0.017003	0	3762	0.01695	0	3762	0.017342	0	3762	0.016693	0
3767	0.017064	0	3767	0.017449	0	3767	0.017218	0	3767	0.017779	0	3767	0.017041	0	3767	0.016989	0	3767	0.017382	0	3767	0.016731	0
3772	0.017102	0	3772	0.017489	0	3772	0.017257	0	3772	0.017818	0	3772	0.01708	0	3772	0.017028	0	3772	0.017421	0	3772	0.016769	0
3777	0.017141	0	3777	0.017529	0	3777	0.017297	0	3777	0.017857	0	3777	0.017119	0	3777	0.017066	0	3777	0.01746	0	3777	0.016807	0
3782	0.017179	0	3782	0.017568	0	3782	0.017336	0	3782	0.017897	0	3782	0.017158	0	3782	0.017105	0	3782	0.0175	0	3782	0.016845	0
3787	0.017218	0	3787	0.017608	0	3787	0.017375	0	3787	0.017936	0	3787	0.017197	0	3787	0.017144	0	3787	0.017539	0	3787	0.016883	0
3792	0.017256	0	3792	0.017648	0	3792	0.017415	0	3792	0.017976	0	3792	0.017236	0	3792	0.017183	0	3792	0.017579	0	3792	0.016921	0
3797	0.017295	0	3797	0.017688	0	3797	0.017454	0	3797	0.018015	0	3797	0.017275	0	3797	0.017222	0	3797	0.017618	0	3797	0.01696	0
3802	0.017333	0	3802	0.017728	0	3802	0.017493	0	3802	0.018055	0	3802	0.017314	0	3802	0.017261	0	3802	0.017658	0	3802	0.016998	0
3807	0.017372	0	3807	0.017768	0	3807	0.017533	0	3807	0.018095	0	3807	0.017353	0	3807	0.0173	0	3807	0.017698	0	3807	0.017037	0
3812	0.017411	0	3812	0.017807	0	3812	0.017572	0	3812	0.018135	0	3812	0.017392	0	3812	0.017339	0	3812	0.017737	0	3812	0.017075	0
3817	0.017449	0	3817	0.017847	0	3817	0.017612	0	3817	0.018174	0	3817	0.017431	0	3817	0.017378	0	3817	0.017777	0	3817	0.017113	0
3822	0.017488	0	3822	0.017888	0	3822	0.017652	0	3822	0.018214	0	3822	0.01747	0	3822	0.017417	0	3822	0.017817	0	3822	0.017152	0
3827	0.017527	0	3827	0.017928	0	3827	0.017691	0	3827	0.018254	0	3827	0.01751	0	3827	0.017456	0	3827	0.017857	0	3827	0.017191	0
3832	0.017566	0	3832	0.017968	0	3832	0.017731	0	3832	0.018294	0	3832	0.017549	0	3832	0.017496	0	3832	0.017897	0	3832	0.017229	0
3837	0.017605	0	3837	0.018008	0	3837	0.017771	0	3837	0.018334	0	3837	0.017588	0	3837	0.017535	0	3837	0.017936	0	3837	0.017268	0
3842	0.017644	0	3842	0.018048	0	3842	0.017811	0	3842	0.018374	0	3842	0.017628	0	3842	0.017574	0	3842	0.017976	0	3842	0.017306	0
3847	0.017682	0	3847	0.018088	0	3847	0.01785	0	3847	0.018414	0	3847	0.017667	0	3847	0.017613	0	3847	0.018016	0	3847	0.017345	0
3852	0.017722	0	3852	0.018129	0	3852	0.01789	0	3852	0.018454	0	3852	0.017707	0	3852	0.017653	0	3852	0.018056	0	3852	0.017384	0
3857	0.017761	0	3857	0.018169	0	3857	0.01793	0	3857	0.018494	0	3857	0.017746	0	3857	0.017692	0	3857	0.018097	0	3857	0.017423	0
3862	0.0178	0	3862	0.018209	0	3862	0.01797	0	3862	0.018534	0	3862	0.017786	0	3862	0.017732	0	3862	0.018137	0	3862	0.017462	0
3867	0.017839	0	3867	0.01825	0	3867	0.01801	0	3867	0.018575	0	3867	0.017825	0	3867	0.017771	0	3867	0.018177	0	3867	0.017501	0
3872	0.017878	0	3872	0.01829	0	3872	0.01805	0	3872	0.018615	0	3872	0.017865	0	3872	0.017811	0	3872	0.018217	0	3872	0.01754	0
3877	0.017917	0	3877	0.018331	0	3877	0.01809	0	3877	0.018655	0	3877	0.017905	0	3877	0.017851	0	3877	0.018257	0	3877	0.017579	0
3882	0.017957	0	3882	0.018372	0	3882	0.01813	0	3882	0.018695	0	3882	0.017945	0	3882	0.01789	0	3882	0.018298	0	3882	0.017618	0
3887	0.017996	0	3887	0.018412	0	3887	0.018171	0	3887	0.018736	0	3887	0.017984	0	3887	0.01793	0	3887	0.018338	0	3887	0.017657	0
3892	0.018035	0	3892	0.018453	0	3892	0.018211	0	3892	0.018776	0	3892	0.018024	0	3892	0.01797	0	3892	0.018378	0	3892	0.017696	0
3897	0.018075	0	3897	0.018494	0	3897	0.018251	0	3897	0.018817	0	3897	0.018064	0	3897	0.01801	0	3897	0.018419	0	3897	0.017735	0
3902	0.018114	0	3902	0.018534	0	3902	0.018292	0	3902	0.018857	0	3902	0.018104	0	3902	0.018049	0	3902	0.018459	0	3902	0.017774	0
3907	0.018154	0	3907	0.018575	0	3907	0.018332	0	3907	0.018898	0	3907	0.018144	0	3907	0.018089	0	3907	0.0185	0	3907	0.017814	0
3912	0.018193	0	3912	0.018616	0	3912	0.018372	0	3912	0.018938	0	3912	0.018184	0	3912	0.018129	0	3912	0.018541	0	3912	0.017853	0
3917	0.018233	0	3917	0.018657	0	3917	0.018413	0	3917	0.018979	0	3917	0.018224	0	3917	0.018169	0	3917	0.018581	0	3917	0.017892	0
3922	0.018272	0	3922	0.018698	0	3922	0.018453	0	3922	0.01902	0	3922	0.018264	0	3922	0.018209	0	3922	0.018622	0	3922	0.017932	0
3927	0.018312	0	3927	0.018739	0	3927	0.018494	0	3927	0.01906	0	3927	0.018304	0	3927	0.018249	0	3927	0.018663	0	3927	0.017971	0
3932	0.018352	0	3932	0.01878	0	3932	0.018534	0	3932	0.019101	0	3932	0.018345	0	3932	0.018289	0	3932	0.018703	0	3932	0.01801	0
3937	0.018392	0	3937	0.018821	0	3937	0.018575	0	3937	0.019142	0	3937	0.018385	0	3937	0.01833	0	3937	0.018744	0	3937	0.01805	0
3942	0.018431	0	3942	0.018862	0	3942	0.018616	0	3942	0.019183	0	3942	0.018425	0	3942	0.01837	0	3942	0.018785	0	3942	0.01809	0
3947	0.018471	0	3947	0.018903	0	3947	0.018656	0	3947	0.019224	0	3947	0.018465	0	3947	0.01841	0	3947	0.018826	0	3947	0.018129	0
3952	0.018511	0	3952	0.018944	0	3952	0.018697	0	3952	0.019265	0	3952	0.018506	0	3952	0.01845	0	3952	0.018867	0	3952	0.018169	0
3957	0.018551	0	3957	0.018986	0	3957	0.018738	0	3957	0.019306	0	3957	0.018546	0	3957	0.018491	0	3957	0.018908	0	3957	0.018208	0
3962	0.018591	0	3962	0.019027	0	3962	0.018779	0	3962	0.019347	0	3962	0.018587	0	3962	0.018531	0	3962	0.018949	0	3962	0.018248	0
3967	0.018631	0	3967	0.019068	0	3967	0.01882	0	3967	0.019388	0	3967	0.018627	0	3967	0.018571	0	3967	0.01899	0	3967	0.018288	0
3972	0.018671	0	3972	0.01911	0	3972	0.018861	0	3972	0.019429	0	3972	0.018668	0	3972	0.018612	0	3972	0.019031	0	3972	0.018328	0
3977	0.018711	0	3977	0.019151	0	3977	0.018902	0	3977	0.01947	0	3977	0.018708	0	3977	0.018652	0	3977	0.019072	0	3977	0.018368	0
3982	0.018751	0	3982	0.019193	0	3982	0.018943	0	3982	0.019511	0	3982	0.018749	0	3982	0.018693	0	3982	0.019113	0	3982	0.018408	0
3987	0.018792	0	3987	0.019234	0	3987	0.018984	0	3987	0.019553	0	3987	0.01879	0	3987	0.018734	0	3987	0.019155	0	3987	0.018448	0
3992	0.018832	0	3992	0.019276	0	3992	0.019025	0	3992	0.019594	0	3992	0.01883	0	3992	0.018774	0	3992	0.019196	0	3992	0.018488	0
3997	0.018872	0	3997	0.019317	0	3997	0.019066	0	3997	0.019635	0	3997	0.018871	0	3997	0.018815	0	3997	0.019237	0	3997	0.018528	0
4002	0.018912	0	4002	0.019359	0	4002	0.019107	0	4002	0.019677	0	4002	0.018912	0	4002	0.018856	0	4002	0.019279	0	4002	0.018568	0
4007	0.018953	0	4007	0.019401	0	4007	0.019149	0	4007	0.019718	0	4007	0.018953	0	4007	0.018896	0	4007	0.01932	0	4007	0.018608	0
4012	0.018993	0	4012	0.019442	0	4012	0.01919	0	4012	0.01976	0	4012	0.018994	0	4012	0.018937	0	4012	0.019361	0	4012	0.018648	0
4017	0.019034	0	4017	0.019484	0	4017	0.019231	0	4017	0.019801	0	4017	0.019035	0	4017	0.018978	0	4017	0.019403	0	4017	0.018688	0
4022	0.019074	0	4022	0.019526	0	4022	0.019273	0	4022	0.019843	0	4022	0.019075	0	4022	0.019019	0	4022	0.019445	0	4022	0.018728	0
4027	0.019115	0	4027	0.019568	0	4027	0.019314	0	4027	0.019884	0	4027	0.019117	0	4027	0.01906	0	4027	0.019486	0	4027	0.018769	0
4032	0.019155	0	4032	0.01961	0	4032	0.019356	0	4032	0.019926	0	4032	0.019158	0	4032	0.019101	0	4032	0.019528	0	4032	0.018809	0
4037	0.019196	0	4037	0.019652	0	4037	0.019397	0	4037	0.019968	0	4037	0.019199	0	4037	0.019142	0	4037	0.01957	0	4037	0.018849	0
4042	0.019236	0	4042	0.019694	0	4042	0.019439	0	4042	0.020009	0	4042	0.01924	0	4042	0.019183	0	4042	0.019611	0	4042	0.01889	0
4047	0.019277	0	4047	0.019736	0	4047	0.01948	0	4047	0.020051	0	4047	0.019281	0	4047	0.019224	0	4047	0.019653	0	4047	0.01893	0
4052	0.019318	0	4052	0.019778	0	4052	0.019522	0	4052	0.020093	0	4052	0.019322	0	4052	0.019265	0	4052	0.019695	0	4052	0.018971	0
4057	0.019359	0	4057	0.01982	0	4057	0.019564	0	4057	0.020135	0	4057	0.019364	0	4057	0.019307	0	4057	0.019737	0	4057	0.019011	0
4062	0.019399	0	4062	0.019862	0	4062	0.019606	0	4062	0.020177	0	4062	0.019405	0	4062	0.019348	0	4062	0.019779	0	4062	0.019052	0
4067	0.01944	0	4067	0.019905	0	4067	0.019647	0	4067	0.020219	0	4067	0.019446	0	4067	0.019389	0	4067	0.019821	0	4067	0.019093	0
4072	0.019481	0	4072	0.019947	0	4072	0.019689	0	4072	0.020261	0	4072	0.019488	0	4072	0.01943	0	4072	0.019863	0	4072	0.019133	0
4077	0.019522	0	4077	0.019989	0	4077	0.019731	0	4077	0.020303	0	4077	0.019529	0	4077	0.019472	0	4077	0.019905	0	4077	0.019174	0
4082	0.019563	0	4082	0.020032	0	4082	0.019773	0	4082	0.020345	0	4082	0.019571	0	4082	0.019513	0	4082	0.019947	0	4082	0.019215	0
4087	0.019604	0	4087	0.020074	0	4087	0.019815	0	4087	0.020387	0	4087	0.019612	0	4087	0.019555	0	4087	0.019989	0	4087	0.019256	0
4092	0.019645	0	4092	0.020116	0	4092	0.019857	0	4092	0.020429	0	4092	0.019654	0	4092	0.019596	0	4092	0.020031	0	4092	0.019297	0
4097	0.019687	0	4097	0.020159	0	4097	0.019899	0	4097	0.020471	0	4097	0.019696	0	4097	0.019638	0	4097	0.020073	0	4097	0.019338	0
4102	0.019728	0	4102	0.020202	0	4102	0.019941	0	4102	0.020514	0	4102	0.019737	0	4102	0.019679	0	4102	0.020116	0	4102	0.019378	0
4107	0.019769	0	4107	0.020244	0	4107	0.019983	0	4107	0.020556	0	4107	0.019779	0	4107	0.019721	0	4107	0.020158	0	4107	0.019419	0
4112	0.01981	0	4112	0.020287	0	4112	0.020026	0	4112	0.020598	0	4112	0.019821	0	4112	0.019763	0	4112	0.0202	0	4112	0.01946	0
4117	0.019851	0	4117	0.020329	0	4117	0.020068	0	4117	0.020641	0	4117	0.019863	0	4117	0.019804	0	4117	0.020243	0	4117	0.019502	0
4122	0.019893	0	4122	0.020372	0	4122	0.02011	0	4122	0.020683	0	4122	0.019904	0	4122	0.019846	0	4122	0.020285	0	4122	0.019543	0
4127	0.019934	0	4127	0.020415	0	4127	0.020152	0	4127	0.020726	0	4127	0.019946	0	4127	0.019888	0	4127	0.020328	0	4127	0.019584	0
4132	0.019976	0	4132	0.020458	0	4132	0.020195	0	4132	0.020768	0	4132	0.019988	0	4132	0.01993	0	4132	0.02037	0	4132	0.019625	0
4137	0.020017	0	4137	0.020501	0	4137	0.020237	0	4137	0.020811	0	4137	0.02003	0	4137	0.019972	0	4137	0.020413	0	4137	0.019666	0
4142	0.020059	0	4142	0.020544	0	4142	0.02028	0	4142	0.020853	0	4142	0.020072	0	4142	0.020014	0	4142	0.020455	0	4142	0.019708	0
4147	0.0201	0	4147	0.020587	0	4147	0.020322	0	4147	0.020896	0	4147	0.020114	0	4147	0.020056	0	4147	0.020498	0	4147	0.019749	0
4152	0.020142	0	4152	0.02063	0	4152	0.020365	0	4152	0.020939	0	4152	0.020157	0	4152	0.020098	0	4152	0.020541	0	4152	0.01979	0
4157	0.020184	0	4157	0.020673	0	4157	0.020407	0	4157	0.020981	0	4157	0.020199	0	4157	0.02014	0	4157	0.020583	0	4157	0.019832	0
4162	0.020225	0	4162	0.020716	0	4162	0.02045	0	4162	0.021024	0	4162	0.020241	0	4162	0.020182	0	4162	0.020626	0	4162	0.019873	0
4167	0.020267	0	4167	0.020759	0	4167	0.020493	0	4167	0.021067	0	4167	0.020283	0	4167	0.020224	0	4167	0.020669	0	4167	0.019915	0
4172	0.020309	0	4172	0.020802	0	4172	0.020535	0	4172	0.02111	0	4172	0.020326	0	4172	0.020267	0	4172	0.020712	0	4172	0.019956	0
4177	0.020351	0	4177	0.020845	0	4177	0.020578	0	4177	0.021153	0	4177	0.020368	0	4177	0.020309	0	4177	0.020755	0	4177	0.019998	0
4182	0.020392	0	4182	0.020889	0	4182	0.020621	0	4182	0.021196	0	4182	0.02041	0	4182	0.020351	0	4182	0.020798	0	4182	0.02004	0
4187	0.020434	0	4187	0.020932	0	4187	0.020664	0	4187	0.021239	0	4187	0.020453	0	4187	0.020393	0	4187	0.020841	0	4187	0.020081	0
4192	0.020476	0	4192	0.020975	0	4192	0.020707	0	4192	0.021282	0	4192	0.020495	0	4192	0.020436	0	4192	0.020884	0	4192	0.020123	0
4197	0.020518	0	4197	0.021019	0	4197	0.02075	0	4197	0.021325	0	4197	0.020538	0	4197	0.020478	0	4197	0.020927	0	4197	0.020165	0
4202	0.02056	0	4202	0.021062	0	4202	0.020793	0	4202	0.021368	0	4202	0.02058	0	4202	0.020521	0	4202	0.02097	0	4202	0.020207	0
4207	0.020602	0	4207	0.021106	0	4207	0.020836	0	4207	0.021411	0	4207	0.020623	0	4207	0.020563	0	4207	0.021014	0	4207	0.020248	0
4212	0.020645	0	4212	0.021149	0	4212	0.020879	0	4212	0.021454	0	4212	0.020666	0	4212	0.020606	0	4212	0.021057	0	4212	0.02029	0
4217	0.020687	0	4217	0.021193	0	4217	0.020922	0	4217	0.021498	0	4217	0.020708	0	4217	0.020649	0	4217	0.0211	0	4217	0.020332	0
4222	0.020729	0	4222	0.021236	0	4222	0.020965	0	4222	0.021541	0	4222	0.020751	0	4222	0.020691	0	4222	0.021143	0	4222	0.020374	0
4227	0.020771	0	4227	0.02128	0	4227	0.021008	0	4227	0.021584	0	4227	0.020794	0	4227	0.020734	0	4227	0.021187	0	4227	0.020416	0
4232	0.020813	0	4232	0.021324	0	4232	0.021052	0	4232	0.021628	0	4232	0.020837	0	4232	0.020777	0	4232	0.02123	0	4232	0.020458	0
4237	0.020856	0	4237	0.021368	0	4237	0.021095	0	4237	0.021671	0	4237	0.02088	0	4237	0.020819	0	4237	0.021274	0	4237	0.0205	0
4242	0.020898	0	4242	0.021411	0	4242	0.021138	0	4242	0.021715	0	4242	0.020922	0	4242	0.020862	0	4242	0.021317	0	4242	0.020543	0
4247	0.020941	0	4247	0.021455	0	4247	0.021182	0	4247	0.021758	0	4247	0.020965	0	4247	0.020905	0	4247	0.021361	0	4247	0.020585	0
4252	0.020983	0	4252	0.021499	0	4252	0.021225	0	4252	0.021802	0	4252	0.021008	0	4252	0.020948	0	4252	0.021404	0	4252	0.020627	0
4257	0.021026	0	4257	0.021543	0	4257	0.021269	0	4257	0.021845	0	4257	0.021052	0	4257	0.020991	0	4257	0.021448	0	4257	0.020669	0
4262	0.021068	0	4262	0.021587	0	4262	0.021312	0	4262	0.021889	0	4262	0.021095	0	4262	0.021034	0	4262	0.021492	0	4262	0.020712	0
4267	0.021111	0	4267	0.021631	0	4267	0.021356	0	4267	0.021933	0	4267	0.021138	0	4267	0.021077	0	4267	0.021535	0	4267	0.020754	0
4272	0.021153	0	4272	0.021675	0	4272	0.021399	0	4272	0.021977	0	4272	0.021181	0	4272	0.02112	0	4272	0.021579	0	4272	0.020797	0
4277	0.021196	0	4277	0.021719	0	4277	0.021443	0	4277	0.02202	0	4277	0.021224	0	4277	0.021163	0	4277	0.021623	0	4277	0.020839	0
4282	0.021239	0	4282	0.021763	0	4282	0.021487	0	4282	0.022064	0	4282	0.021267	0	4282	0.021207	0	4282	0.021667	0	4282	0.020882	0
4287	0.021282	0	4287	0.021808	0	4287	0.02153	0	4287	0.022108	0	4287	0.021311	0	4287	0.02125	0	4287	0.021711	0	4287	0.020924	0
4292	0.021324	0	4292	0.021852	0	4292	0.021574	0	4292	0.022152	0	4292	0.021354	0	4292	0.021293	0	4292	0.021755	0	4292	0.020967	0
4297	0.021367	0	4297	0.021896	0	4297	0.021618	0	4297	0.022196	0	4297	0.021398	0	4297	0.021336	0	4297	0.021799	0	4297	0.021009	0
4302	0.02141	0	4302	0.021941	0	4302	0.021662	0	4302	0.02224	0	4302	0.021441	0	4302	0.02138	0	4302	0.021843	0	4302	0.021052	0
4307	0.021453	0	4307	0.021985	0	4307	0.021706	0	4307	0.022284	0	4307	0.021485	0	4307	0.021423	0	4307	0.021887	0	4307	0.021095	0
4312	0.021496	0	4312	0.022029	0	4312	0.02175	0	4312	0.022328	0	4312	0.021528	0	4312	0.021467	0	4312	0.021931	0	4312	0.021137	0
4317	0.021539	0	4317	0.022074	0	4317	0.021794	0	4317	0.022372	0	4317	0.021572	0	4317	0.02151	0	4317	0.021975	0	4317	0.02118	0
4322	0.021582	0	4322	0.022118	0	4322	0.021838	0	4322	0.022416	0	4322	0.021615	0	4322	0.021554	0	4322	0.02202	0	4322	0.021223	0
4327	0.021625	0	4327	0.022163	0	4327	0.021882	0	4327	0.022461	0	4327	0.021659	0	4327	0.021597	0	4327	0.022064	0	4327	0.021266	0
4332	0.021668	0	4332	0.022208	0	4332	0.021926	0	4332	0.022505	0	4332	0.021703	0	4332	0.021641	0	4332	0.022108	0	4332	0.021309	0
4337	0.021712	0	4337	0.022252	0	4337	0.02197	0	4337	0.022549	0	4337	0.021746	0	4337	0.021685	0	4337	0.022152	0	4337	0.021352	0
4342	0.021755	0	4342	0.022297	0	4342	0.022015	0	4342	0.022593	0	4342	0.02179	0	4342	0.021728	0	4342	0.022197	0	4342	0.021395	0
4347	0.021798	0	4347	0.022342	0	4347	0.022059	0	4347	0.022638	0	4347	0.021834	0	4347	0.021772	0	4347	0.022241	0	4347	0.021438	0
4352	0.021841	0	4352	0.022387	0	4352	0.022103	0	4352	0.022682	0	4352	0.021878	0	4352	0.021816	0	4352	0.022286	0	4352	0.021481	0
4357	0.021885	0	4357	0.022431	0	4357	0.022148	0	4357	0.022727	0	4357	0.021922	0	4357	0.02186	0	4357	0.02233	0	4357	0.021524	0
4362	0.021928	0	4362	0.022476	0	4362	0.022192	0	4362	0.022771	0	4362	0.021966	0	4362	0.021904	0	4362	0.022375	0	4362	0.021568	0
4367	0.021972	0	4367	0.022521	0	4367	0.022237	0	4367	0.022816	0	4367	0.02201	0	4367	0.021948	0	4367	0.02242	0	4367	0.021611	0
4372	0.022015	0	4372	0.022566	0	4372	0.022281	0	4372	0.022861	0	4372	0.022054	0	4372	0.021992	0	4372	0.022464	0	4372	0.021654	0
4377	0.022059	0	4377	0.022611	0	4377	0.022326	0	4377	0.022905	0	4377	0.022098	0	4377	0.022036	0	4377	0.022509	0	4377	0.021697	0
4382	0.022102	0	4382	0.022656	0	4382	0.02237	0	4382	0.02295	0	4382	0.022142	0	4382	0.02208	0	4382	0.022554	0	4382	0.021741	0
4387	0.022146	0	4387	0.022701	0	4387	0.022415	0	4387	0.022995	0	4387	0.022186	0	4387	0.022124	0	4387	0.022599	0	4387	0.021784	0
4392	0.02219	0	4392	0.022747	0	4392	0.02246	0	4392	0.023039	0	4392	0.022231	0	4392	0.022168	0	4392	0.022643	0	4392	0.021828	0
4397	0.022233	0	4397	0.022792	0	4397	0.022504	0	4397	0.023084	0	4397	0.022275	0	4397	0.022212	0	4397	0.022688	0	4397	0.021871	0
4402	0.022277	0	4402	0.022837	0	4402	0.022549	0	4402	0.023129	0	4402	0.022319	0	4402	0.022257	0	4402	0.022733	0	4402	0.021915	0
4407	0.022321	0	4407	0.022882	0	4407	0.022594	0	4407	0.023174	0	4407	0.022364	0	4407	0.022301	0	4407	0.022778	0	4407	0.021958	0
4412	0.022365	0	4412	0.022928	0	4412	0.022639	0	4412	0.023219	0	4412	0.022408	0	4412	0.022345	0	4412	0.022823	0	4412	0.022002	0
4417	0.022409	0	4417	0.022973	0	4417	0.022684	0	4417	0.023264	0	4417	0.022453	0	4417	0.02239	0	4417	0.022868	0	4417	0.022046	0
4422	0.022453	0	4422	0.023018	0	4422	0.022729	0	4422	0.023309	0	4422	0.022497	0	4422	0.022434	0	4422	0.022913	0	4422	0.022089	0
4427	0.022497	0	4427	0.023064	0	4427	0.022774	0	4427	0.023354	0	4427	0.022542	0	4427	0.022478	0	4427	0.022959	0	4427	0.022133	0
4432	0.022541	0	4432	0.023109	0	4432	0.022819	0	4432	0.023399	0	4432	0.022586	0	4432	0.022523	0	4432	0.023004	0	4432	0.022177	0
4437	0.022585	0	4437	0.023155	0	4437	0.022864	0	4437	0.023444	0	4437	0.022631	0	4437	0.022567	0	4437	0.023049	0	4437	0.022221	0
4442	0.022629	0	4442	0.023201	0	4442	0.022909	0	4442	0.02349	0	4442	0.022676	0	4442	0.022612	0	4442	0.023094	0	4442	0.022265	0
4447	0.022673	0	4447	0.023246	0	4447	0.022954	0	4447	0.023535	0	4447	0.02272	0	4447	0.022657	0	4447	0.02314	0	4447	0.022309	0
4452	0.022717	0	4452	0.023292	0	4452	0.022999	0	4452	0.02358	0	4452	0.022765	0	4452	0.022701	0	4452	0.023185	0	4452	0.022353	0
4457	0.022761	0	4457	0.023338	0	4457	0.023045	0	4457	0.023626	0	4457	0.02281	0	4457	0.022746	0	4457	0.02323	0	4457	0.022397	0
4462	0.022806	0	4462	0.023383	0	4462	0.02309	0	4462	0.023671	0	4462	0.022855	0	4462	0.022791	0	4462	0.023276	0	4462	0.022441	0
4467	0.02285	0	4467	0.023429	0	4467	0.023135	0	4467	0.023716	0	4467	0.0229	0	4467	0.022836	0	4467	0.023321	0	4467	0.022485	0
4472	0.022894	0	4472	0.023475	0	4472	0.023181	0	4472	0.023762	0	4472	0.022945	0	4472	0.022881	0	4472	0.023367	0	4472	0.022529	0
4477	0.022939	0	4477	0.023521	0	4477	0.023226	0	4477	0.023808	0	4477	0.02299	0	4477	0.022926	0	4477	0.023413	0	4477	0.022573	0
4482	0.022983	0	4482	0.023567	0	4482	0.023272	0	4482	0.023853	0	4482	0.023035	0	4482	0.022971	0	4482	0.023458	0	4482	0.022617	0
4487	0.023028	0	4487	0.023613	0	4487	0.023317	0	4487	0.023899	0	4487	0.02308	0	4487	0.023016	0	4487	0.023504	0	4487	0.022662	0
4492	0.023072	0	4492	0.023659	0	4492	0.023363	0	4492	0.023944	0	4492	0.023125	0	4492	0.023061	0	4492	0.02355	0	4492	0.022706	0
4497	0.023117	0	4497	0.023705	0	4497	0.023408	0	4497	0.02399	0	4497	0.02317	0	4497	0.023106	0	4497	0.023595	0	4497	0.02275	0
4502	0.023161	0	4502	0.023751	0	4502	0.023454	0	4502	0.024036	0	4502	0.023215	0	4502	0.023151	0	4502	0.023641	0	4502	0.022795	0
4507	0.023206	0	4507	0.023798	0	4507	0.0235	0	4507	0.024082	0	4507	0.023261	0	4507	0.023196	0	4507	0.023687	0	4507	0.022839	0
4512	0.023251	0	4512	0.023844	0	4512	0.023546	0	4512	0.024127	0	4512	0.023306	0	4512	0.023241	0	4512	0.023733	0	4512	0.022884	0
4517	0.023295	0	4517	0.02389	0	4517	0.023591	0	4517	0.024173	0	4517	0.023351	0	4517	0.023286	0	4517	0.023779	0	4517	0.022928	0
4522	0.02334	0	4522	0.023936	0	4522	0.023637	0	4522	0.024219	0	4522	0.023397	0	4522	0.023332	0	4522	0.023825	0	4522	0.022973	0
4527	0.023385	0	4527	0.023983	0	4527	0.023683	0	4527	0.024265	0	4527	0.023442	0	4527	0.023377	0	4527	0.023871	0	4527	0.023018	0
4532	0.02343	0	4532	0.024029	0	4532	0.023729	0	4532	0.024311	0	4532	0.023488	0	4532	0.023422	0	4532	0.023917	0	4532	0.023062	0
4537	0.023475	0	4537	0.024076	0	4537	0.023775	0	4537	0.024357	0	4537	0.023533	0	4537	0.023468	0	4537	0.023963	0	4537	0.023107	0
4542	0.02352	0	4542	0.024122	0	4542	0.023821	0	4542	0.024403	0	4542	0.023579	0	4542	0.023513	0	4542	0.02401	0	4542	0.023152	0
4547	0.023565	0	4547	0.024169	0	4547	0.023867	0	4547	0.02445	0	4547	0.023624	0	4547	0.023559	0	4547	0.024056	0	4547	0.023197	0
4552	0.02361	0	4552	0.024215	0	4552	0.023913	0	4552	0.024496	0	4552	0.02367	0	4552	0.023605	0	4552	0.024102	0	4552	0.023241	0
4557	0.023655	0	4557	0.024262	0	4557	0.023959	0	4557	0.024542	0	4557	0.023716	0	4557	0.02365	0	4557	0.024148	0	4557	0.023286	0
4562	0.0237	0	4562	0.024309	0	4562	0.024006	0	4562	0.024588	0	4562	0.023761	0	4562	0.023696	0	4562	0.024195	0	4562	0.023331	0
4567	0.023745	0	4567	0.024355	0	4567	0.024052	0	4567	0.024635	0	4567	0.023807	0	4567	0.023741	0	4567	0.024241	0	4567	0.023376	0
4572	0.023791	0	4572	0.024402	0	4572	0.024098	0	4572	0.024681	0	4572	0.023853	0	4572	0.023787	0	4572	0.024288	0	4572	0.023421	0
4577	0.023836	0	4577	0.024449	0	4577	0.024144	0	4577	0.024727	0	4577	0.023899	0	4577	0.023833	0	4577	0.024334	0	4577	0.023466	0
4582	0.023881	0	4582	0.024496	0	4582	0.024191	0	4582	0.024774	0	4582	0.023945	0	4582	0.023879	0	4582	0.024381	0	4582	0.023511	0
4587	0.023926	0	4587	0.024543	0	4587	0.024237	0	4587	0.02482	0	4587	0.023991	0	4587	0.023925	0	4587	0.024427	0	4587	0.023557	0
4592	0.023972	0	4592	0.02459	0	4592	0.024284	0	4592	0.024867	0	4592	0.024037	0	4592	0.023971	0	4592	0.024474	0	4592	0.023602	0
4597	0.024017	0	4597	0.024637	0	4597	0.02433	0	4597	0.024913	0	4597	0.024083	0	4597	0.024017	0	4597	0.02452	0	4597	0.023647	0
4602	0.024063	0	4602	0.024684	0	4602	0.024377	0	4602	0.02496	0	4602	0.024129	0	4602	0.024063	0	4602	0.024567	0	4602	0.023692	0
4607	0.024108	0	4607	0.024731	0	4607	0.024423	0	4607	0.025007	0	4607	0.024175	0	4607	0.024109	0	4607	0.024614	0	4607	0.023738	0
4612	0.024154	0	4612	0.024778	0	4612	0.02447	0	4612	0.025053	0	4612	0.024221	0	4612	0.024155	0	4612	0.024661	0	4612	0.023783	0
4617	0.024199	0	4617	0.024825	0	4617	0.024517	0	4617	0.0251	0	4617	0.024267	0	4617	0.024201	0	4617	0.024708	0	4617	0.023828	0
4622	0.024245	0	4622	0.024872	0	4622	0.024563	0	4622	0.025147	0	4622	0.024314	0	4622	0.024247	0	4622	0.024754	0	4622	0.023874	0
4627	0.024291	0	4627	0.02492	0	4627	0.02461	0	4627	0.025194	0	4627	0.02436	0	4627	0.024293	0	4627	0.024801	0	4627	0.023919	0
4632	0.024337	0	4632	0.024967	0	4632	0.024657	0	4632	0.025241	0	4632	0.024406	0	4632	0.02434	0	4632	0.024848	0	4632	0.023965	0
4637	0.024382	0	4637	0.025014	0	4637	0.024704	0	4637	0.025287	0	4637	0.024453	0	4637	0.024386	0	4637	0.024895	0	4637	0.02401	0
4642	0.024428	0	4642	0.025062	0	4642	0.024751	0	4642	0.025334	0	4642	0.024499	0	4642	0.024432	0	4642	0.024943	0	4642	0.024056	0
4647	0.024474	0	4647	0.025109	0	4647	0.024798	0	4647	0.025381	0	4647	0.024546	0	4647	0.024479	0	4647	0.02499	0	4647	0.024102	0
4652	0.02452	0	4652	0.025157	0	4652	0.024845	0	4652	0.025429	0	4652	0.024592	0	4652	0.024525	0	4652	0.025037	0	4652	0.024147	0
4657	0.024566	0	4657	0.025204	0	4657	0.024892	0	4657	0.025476	0	4657	0.024639	0	4657	0.024572	0	4657	0.025084	0	4657	0.024193	0
4662	0.024612	0	4662	0.025252	0	4662	0.024939	0	4662	0.025523	0	4662	0.024686	0	4662	0.024618	0	4662	0.025131	0	4662	0.024239	0
4667	0.024658	0	4667	0.025299	0	4667	0.024986	0	4667	0.02557	0	4667	0.024732	0	4667	0.024665	0	4667	0.025179	0	4667	0.024285	0
4672	0.024704	0	4672	0.025347	0	4672	0.025033	0	4672	0.025617	0	4672	0.024779	0	4672	0.024711	0	4672	0.025226	0	4672	0.024331	0
4677	0.02475	0	4677	0.025395	0	4677	0.02508	0	4677	0.025664	0	4677	0.024826	0	4677	0.024758	0	4677	0.025273	0	4677	0.024377	0
4682	0.024796	0	4682	0.025443	0	4682	0.025128	0	4682	0.025712	0	4682	0.024872	0	4682	0.024805	0	4682	0.025321	0	4682	0.024423	0
4687	0.024842	0	4687	0.02549	0	4687	0.025175	0	4687	0.025759	0	4687	0.024919	0	4687	0.024852	0	4687	0.025368	0	4687	0.024469	0
4692	0.024889	0	4692	0.025538	0	4692	0.025222	0	4692	0.025807	0	4692	0.024966	0	4692	0.024898	0	4692	0.025416	0	4692	0.024515	0
4697	0.024935	0	4697	0.025586	0	4697	0.02527	0	4697	0.025854	0	4697	0.025013	0	4697	0.024945	0	4697	0.025463	0	4697	0.024561	0
4702	0.024981	0	4702	0.025634	0	4702	0.025317	0	4702	0.025901	0	4702	0.02506	0	4702	0.024992	0	4702	0.025511	0	4702	0.024607	0
4707	0.025028	0	4707	0.025682	0	4707	0.025365	0	4707	0.025949	0	4707	0.025107	0	4707	0.025039	0	4707	0.025559	0	4707	0.024653	0
4712	0.025074	0	4712	0.02573	0	4712	0.025412	0	4712	0.025997	0	4712	0.025154	0	4712	0.025086	0	4712	0.025606	0	4712	0.024699	0
4717	0.025121	0	4717	0.025778	0	4717	0.02546	0	4717	0.026044	0	4717	0.025201	0	4717	0.025133	0	4717	0.025654	0	4717	0.024746	0
4722	0.025167	0	4722	0.025826	0	4722	0.025508	0	4722	0.026092	0	4722	0.025248	0	4722	0.02518	0	4722	0.025702	0	4722	0.024792	0
4727	0.025214	0	4727	0.025874	0	4727	0.025555	0	4727	0.02614	0	4727	0.025296	0	4727	0.025227	0	4727	0.02575	0	4727	0.024838	0
4732	0.02526	0	4732	0.025923	0	4732	0.025603	0	4732	0.026187	0	4732	0.025343	0	4732	0.025274	0	4732	0.025797	0	4732	0.024885	0
4737	0.025307	0	4737	0.025971	0	4737	0.025651	0	4737	0.026235	0	4737	0.02539	0	4737	0.025322	0	4737	0.025845	0	4737	0.024931	0
4742	0.025354	0	4742	0.026019	0	4742	0.025698	0	4742	0.026283	0	4742	0.025438	0	4742	0.025369	0	4742	0.025893	0	4742	0.024978	0
4747	0.0254	0	4747	0.026067	0	4747	0.025746	0	4747	0.026331	0	4747	0.025485	0	4747	0.025416	0	4747	0.025941	0	4747	0.025024	0
4752	0.025447	0	4752	0.026116	0	4752	0.025794	0	4752	0.026379	0	4752	0.025532	0	4752	0.025463	0	4752	0.025989	0	4752	0.025071	0
4757	0.025494	0	4757	0.026164	0	4757	0.025842	0	4757	0.026427	0	4757	0.02558	0	4757	0.025511	0	4757	0.026037	0	4757	0.025117	0
4762	0.025541	0	4762	0.026213	0	4762	0.02589	0	4762	0.026475	0	4762	0.025627	0	4762	0.025558	0	4762	0.026086	0	4762	0.025164	0
4767	0.025588	0	4767	0.026261	0	4767	0.025938	0	4767	0.026523	0	4767	0.025675	0	4767	0.025606	0	4767	0.026134	0	4767	0.025211	0
4772	0.025635	0	4772	0.02631	0	4772	0.025986	0	4772	0.026571	0	4772	0.025722	0	4772	0.025653	0	4772	0.026182	0	4772	0.025258	0
4777	0.025682	0	4777	0.026359	0	4777	0.026034	0	4777	0.026619	0	4777	0.02577	0	4777	0.025701	0	4777	0.02623	0	4777	0.025304	0
4782	0.025729	0	4782	0.026407	0	4782	0.026083	0	4782	0.026667	0	4782	0.025818	0	4782	0.025748	0	4782	0.026279	0	4782	0.025351	0
4787	0.025776	0	4787	0.026456	0	4787	0.026131	0	4787	0.026715	0	4787	0.025866	0	4787	0.025796	0	4787	0.026327	0	4787	0.025398	0
4792	0.025823	0	4792	0.026505	0	4792	0.026179	0	4792	0.026764	0	4792	0.025913	0	4792	0.025844	0	4792	0.026375	0	4792	0.025445	0
4797	0.02587	0	4797	0.026553	0	4797	0.026227	0	4797	0.026812	0	4797	0.025961	0	4797	0.025891	0	4797	0.026424	0	4797	0.025492	0
4802	0.025917	0	4802	0.026602	0	4802	0.026276	0	4802	0.02686	0	4802	0.026009	0	4802	0.025939	0	4802	0.026472	0	4802	0.025539	0
4807	0.025964	0	4807	0.026651	0	4807	0.026324	0	4807	0.026909	0	4807	0.026057	0	4807	0.025987	0	4807	0.026521	0	4807	0.025586	0
4812	0.026012	0	4812	0.0267	0	4812	0.026372	0	4812	0.026957	0	4812	0.026105	0	4812	0.026035	0	4812	0.026569	0	4812	0.025633	0
4817	0.026059	0	4817	0.026749	0	4817	0.026421	0	4817	0.027006	0	4817	0.026153	0	4817	0.026083	0	4817	0.026618	0	4817	0.02568	0
4822	0.026106	0	4822	0.026798	0	4822	0.026469	0	4822	0.027054	0	4822	0.026201	0	4822	0.026131	0	4822	0.026667	0	4822	0.025728	0
4827	0.026154	0	4827	0.026847	0	4827	0.026518	0	4827	0.027103	0	4827	0.026249	0	4827	0.026179	0	4827	0.026715	0	4827	0.025775	0
4832	0.026201	0	4832	0.026896	0	4832	0.026567	0	4832	0.027152	0	4832	0.026297	0	4832	0.026227	0	4832	0.026764	0	4832	0.025822	0
4837	0.026249	0	4837	0.026945	0	4837	0.026615	0	4837	0.0272	0	4837	0.026345	0	4837	0.026275	0	4837	0.026813	0	4837	0.025869	0
4842	0.026296	0	4842	0.026995	0	4842	0.026664	0	4842	0.027249	0	4842	0.026393	0	4842	0.026323	0	4842	0.026862	0	4842	0.025917	0
4847	0.026344	0	4847	0.027044	0	4847	0.026713	0	4847	0.027298	0	4847	0.026442	0	4847	0.026371	0	4847	0.026911	0	4847	0.025964	0
4852	0.026392	0	4852	0.027093	0	4852	0.026761	0	4852	0.027346	0	4852	0.02649	0	4852	0.026419	0	4852	0.02696	0	4852	0.026012	0
4857	0.026439	0	4857	0.027142	0	4857	0.02681	0	4857	0.027395	0	4857	0.026538	0	4857	0.026468	0	4857	0.027009	0	4857	0.026059	0
4862	0.026487	0	4862	0.027192	0	4862	0.026859	0	4862	0.027444	0	4862	0.026587	0	4862	0.026516	0	4862	0.027058	0	4862	0.026107	0
4867	0.026535	0	4867	0.027241	0	4867	0.026908	0	4867	0.027493	0	4867	0.026635	0	4867	0.026564	0	4867	0.027107	0	4867	0.026154	0
4872	0.026583	0	4872	0.027291	0	4872	0.026957	0	4872	0.027542	0	4872	0.026684	0	4872	0.026613	0	4872	0.027156	0	4872	0.026202	0
4877	0.02663	0	4877	0.02734	0	4877	0.027006	0	4877	0.027591	0	4877	0.026732	0	4877	0.026661	0	4877	0.027205	0	4877	0.026249	0
4882	0.026678	0	4882	0.02739	0	4882	0.027055	0	4882	0.02764	0	4882	0.026781	0	4882	0.02671	0	4882	0.027254	0	4882	0.026297	0
4887	0.026726	0	4887	0.027439	0	4887	0.027104	0	4887	0.027689	0	4887	0.026829	0	4887	0.026758	0	4887	0.027304	0	4887	0.026345	0
4892	0.026774	0	4892	0.027489	0	4892	0.027153	0	4892	0.027738	0	4892	0.026878	0	4892	0.026807	0	4892	0.027353	0	4892	0.026393	0
4897	0.026822	0	4897	0.027539	0	4897	0.027203	0	4897	0.027788	0	4897	0.026927	0	4897	0.026855	0	4897	0.027402	0	4897	0.026441	0
4902	0.02687	0	4902	0.027588	0	4902	0.027252	0	4902	0.027837	0	4902	0.026975	0	4902	0.026904	0	4902	0.027452	0	4902	0.026488	0
4907	0.026918	0	4907	0.027638	0	4907	0.027301	0	4907	0.027886	0	4907	0.027024	0	4907	0.026953	0	4907	0.027501	0	4907	0.026536	0
4912	0.026967	0	4912	0.027688	0	4912	0.02735	0	4912	0.027935	0	4912	0.027073	0	4912	0.027001	0	4912	0.02755	0	4912	0.026584	0
4917	0.027015	0	4917	0.027738	0	4917	0.0274	0	4917	0.027985	0	4917	0.027122	0	4917	0.02705	0	4917	0.0276	0	4917	0.026632	0
4922	0.027063	0	4922	0.027788	0	4922	0.027449	0	4922	0.028034	0	4922	0.027171	0	4922	0.027099	0	4922	0.02765	0	4922	0.02668	0
4927	0.027111	0	4927	0.027838	0	4927	0.027499	0	4927	0.028084	0	4927	0.02722	0	4927	0.027148	0	4927	0.027699	0	4927	0.026728	0
4932	0.02716	0	4932	0.027888	0	4932	0.027548	0	4932	0.028133	0	4932	0.027269	0	4932	0.027197	0	4932	0.027749	0	4932	0.026777	0
4937	0.027208	0	4937	0.027938	0	4937	0.027598	0	4937	0.028183	0	4937	0.027318	0	4937	0.027246	0	4937	0.027799	0	4937	0.026825	0
4942	0.027256	0	4942	0.027988	0	4942	0.027647	0	4942	0.028232	0	4942	0.027367	0	4942	0.027295	0	4942	0.027848	0	4942	0.026873	0
4947	0.027305	0	4947	0.028038	0	4947	0.027697	0	4947	0.028282	0	4947	0.027416	0	4947	0.027344	0	4947	0.027898	0	4947	0.026921	0
4952	0.027353	0	4952	0.028088	0	4952	0.027746	0	4952	0.028332	0	4952	0.027465	0	4952	0.027393	0	4952	0.027948	0	4952	0.02697	0
4957	0.027402	0	4957	0.028138	0	4957	0.027796	0	4957	0.028381	0	4957	0.027515	0	4957	0.027442	0	4957	0.027998	0	4957	0.027018	0
4962	0.02745	0	4962	0.028189	0	4962	0.027846	0	4962	0.028431	0	4962	0.027564	0	4962	0.027491	0	4962	0.028048	0	4962	0.027066	0
4967	0.027499	0	4967	0.028239	0	4967	0.027896	0	4967	0.028481	0	4967	0.027613	0	4967	0.02754	0	4967	0.028098	0	4967	0.027115	0
4972	0.027548	0	4972	0.028289	0	4972	0.027946	0	4972	0.028531	0	4972	0.027662	0	4972	0.02759	0	4972	0.028148	0	4972	0.027163	0
4977	0.027596	0	4977	0.02834	0	4977	0.027996	0	4977	0.028581	0	4977	0.027712	0	4977	0.027639	0	4977	0.028198	0	4977	0.027212	0
4982	0.027645	0	4982	0.02839	0	4982	0.028045	0	4982	0.028631	0	4982	0.027761	0	4982	0.027688	0	4982	0.028248	0	4982	0.02726	0
4987	0.027694	0	4987	0.028441	0	4987	0.028095	0	4987	0.02868	0	4987	0.027811	0	4987	0.027738	0	4987	0.028298	0	4987	0.027309	0
4992	0.027743	0	4992	0.028491	0	4992	0.028145	0	4992	0.028731	0	4992	0.02786	0	4992	0.027787	0	4992	0.028348	0	4992	0.027358	0
4997	0.027792	0	4997	0.028542	0	4997	0.028196	0	4997	0.028781	0	4997	0.02791	0	4997	0.027837	0	4997	0.028398	0	4997	0.027406	0
5002	0.027841	0	5002	0.028593	0	5002	0.028246	0	5002	0.028831	0	5002	0.02796	0	5002	0.027886	0	5002	0.028449	0	5002	0.027455	0
5007	0.027889	0	5007	0.028643	0	5007	0.028296	0	5007	0.028881	0	5007	0.028009	0	5007	0.027936	0	5007	0.028499	0	5007	0.027504	0
5012	0.027939	0	5012	0.028694	0	5012	0.028346	0	5012	0.028931	0	5012	0.028059	0	5012	0.027985	0	5012	0.028549	0	5012	0.027553	0
5017	0.027988	0	5017	0.028745	0	5017	0.028396	0	5017	0.028981	0	5017	0.028109	0	5017	0.028035	0	5017	0.0286	0	5017	0.027602	0
5022	0.028037	0	5022	0.028796	0	5022	0.028447	0	5022	0.029032	0	5022	0.028159	0	5022	0.028085	0	5022	0.02865	0	5022	0.027651	0
5027	0.028086	0	5027	0.028846	0	5027	0.028497	0	5027	0.029082	0	5027	0.028208	0	5027	0.028135	0	5027	0.028701	0	5027	0.027699	0
5032	0.028135	0	5032	0.028897	0	5032	0.028547	0	5032	0.029132	0	5032	0.028258	0	5032	0.028184	0	5032	0.028751	0	5032	0.027748	0
5037	0.028184	0	5037	0.028948	0	5037	0.028598	0	5037	0.029183	0	5037	0.028308	0	5037	0.028234	0	5037	0.028802	0	5037	0.027798	0
5042	0.028233	0	5042	0.028999	0	5042	0.028648	0	5042	0.029233	0	5042	0.028358	0	5042	0.028284	0	5042	0.028852	0	5042	0.027847	0
5047	0.028283	0	5047	0.02905	0	5047	0.028699	0	5047	0.029284	0	5047	0.028408	0	5047	0.028334	0	5047	0.028903	0	5047	0.027896	0
5052	0.028332	0	5052	0.029101	0	5052	0.028749	0	5052	0.029334	0	5052	0.028458	0	5052	0.028384	0	5052	0.028954	0	5052	0.027945	0
5057	0.028382	0	5057	0.029152	0	5057	0.0288	0	5057	0.029385	0	5057	0.028508	0	5057	0.028434	0	5057	0.029005	0	5057	0.027994	0
5062	0.028431	0	5062	0.029204	0	5062	0.028851	0	5062	0.029435	0	5062	0.028559	0	5062	0.028484	0	5062	0.029055	0	5062	0.028043	0
5067	0.02848	0	5067	0.029255	0	5067	0.028901	0	5067	0.029486	0	5067	0.028609	0	5067	0.028534	0	5067	0.029106	0	5067	0.028093	0
5072	0.02853	0	5072	0.029306	0	5072	0.028952	0	5072	0.029537	0	5072	0.028659	0	5072	0.028584	0	5072	0.029157	0	5072	0.028142	0
5077	0.02858	0	5077	0.029357	0	5077	0.029003	0	5077	0.029587	0	5077	0.028709	0	5077	0.028635	0	5077	0.029208	0	5077	0.028191	0
5082	0.028629	0	5082	0.029409	0	5082	0.029054	0	5082	0.029638	0	5082	0.02876	0	5082	0.028685	0	5082	0.029259	0	5082	0.028241	0
5087	0.028679	0	5087	0.02946	0	5087	0.029105	0	5087	0.029689	0	5087	0.02881	0	5087	0.028735	0	5087	0.02931	0	5087	0.02829	0
5092	0.028728	0	5092	0.029512	0	5092	0.029155	0	5092	0.02974	0	5092	0.02886	0	5092	0.028785	0	5092	0.029361	0	5092	0.02834	0
5097	0.028778	0	5097	0.029563	0	5097	0.029206	0	5097	0.029791	0	5097	0.028911	0	5097	0.028836	0	5097	0.029412	0	5097	0.02839	0
5102	0.028828	0	5102	0.029615	0	5102	0.029257	0	5102	0.029842	0	5102	0.028961	0	5102	0.028886	0	5102	0.029463	0	5102	0.028439	0
5107	0.028878	0	5107	0.029666	0	5107	0.029308	0	5107	0.029893	0	5107	0.029012	0	5107	0.028937	0	5107	0.029515	0	5107	0.028489	0
5112	0.028928	0	5112	0.029718	0	5112	0.02936	0	5112	0.029944	0	5112	0.029062	0	5112	0.028987	0	5112	0.029566	0	5112	0.028538	0
5117	0.028978	0	5117	0.029769	0	5117	0.029411	0	5117	0.029995	0	5117	0.029113	0	5117	0.029038	0	5117	0.029617	0	5117	0.028588	0
5122	0.029028	0	5122	0.029821	0	5122	0.029462	0	5122	0.030046	0	5122	0.029164	0	5122	0.029088	0	5122	0.029669	0	5122	0.028638	0
5127	0.029078	0	5127	0.029873	0	5127	0.029513	0	5127	0.030097	0	5127	0.029215	0	5127	0.029139	0	5127	0.02972	0	5127	0.028688	0
5132	0.029128	0	5132	0.029925	0	5132	0.029564	0	5132	0.030149	0	5132	0.029265	0	5132	0.02919	0	5132	0.029771	0	5132	0.028738	0
5137	0.029178	0	5137	0.029977	0	5137	0.029616	0	5137	0.0302	0	5137	0.029316	0	5137	0.02924	0	5137	0.029823	0	5137	0.028788	0
5142	0.029228	0	5142	0.030028	0	5142	0.029667	0	5142	0.030251	0	5142	0.029367	0	5142	0.029291	0	5142	0.029874	0	5142	0.028838	0
5147	0.029278	0	5147	0.03008	0	5147	0.029719	0	5147	0.030303	0	5147	0.029418	0	5147	0.029342	0	5147	0.029926	0	5147	0.028888	0
5152	0.029328	0	5152	0.030132	0	5152	0.02977	0	5152	0.030354	0	5152	0.029469	0	5152	0.029393	0	5152	0.029977	0	5152	0.028938	0
5157	0.029378	0	5157	0.030184	0	5157	0.029821	0	5157	0.030406	0	5157	0.02952	0	5157	0.029444	0	5157	0.030029	0	5157	0.028988	0
5162	0.029429	0	5162	0.030236	0	5162	0.029873	0	5162	0.030457	0	5162	0.029571	0	5162	0.029495	0	5162	0.030081	0	5162	0.029038	0
5167	0.029479	0	5167	0.030289	0	5167	0.029925	0	5167	0.030509	0	5167	0.029622	0	5167	0.029546	0	5167	0.030133	0	5167	0.029088	0
5172	0.029529	0	5172	0.030341	0	5172	0.029976	0	5172	0.03056	0	5172	0.029673	0	5172	0.029597	0	5172	0.030184	0	5172	0.029138	0
5177	0.02958	0	5177	0.030393	0	5177	0.030028	0	5177	0.030612	0	5177	0.029724	0	5177	0.029648	0	5177	0.030236	0	5177	0.029189	0
5182	0.02963	0	5182	0.030445	0	5182	0.03008	0	5182	0.030663	0	5182	0.029775	0	5182	0.029699	0	5182	0.030288	0	5182	0.029239	0
5187	0.029681	0	5187	0.030498	0	5187	0.030131	0	5187	0.030715	0	5187	0.029827	0	5187	0.02975	0	5187	0.03034	0	5187	0.029289	0
5192	0.029731	0	5192	0.03055	0	5192	0.030183	0	5192	0.030767	0	5192	0.029878	0	5192	0.029801	0	5192	0.030392	0	5192	0.02934	0
5197	0.029782	0	5197	0.030602	0	5197	0.030235	0	5197	0.030819	0	5197	0.029929	0	5197	0.029852	0	5197	0.030444	0	5197	0.02939	0
5202	0.029833	0	5202	0.030655	0	5202	0.030287	0	5202	0.030871	0	5202	0.029981	0	5202	0.029904	0	5202	0.030496	0	5202	0.02944	0
5207	0.029883	0	5207	0.030707	0	5207	0.030339	0	5207	0.030923	0	5207	0.030032	0	5207	0.029955	0	5207	0.030548	0	5207	0.029491	0
5212	0.029934	0	5212	0.03076	0	5212	0.030391	0	5212	0.030974	0	5212	0.030084	0	5212	0.030007	0	5212	0.0306	0	5212	0.029542	0
5217	0.029985	0	5217	0.030812	0	5217	0.030443	0	5217	0.031026	0	5217	0.030135	0	5217	0.030058	0	5217	0.030652	0	5217	0.029592	0
5222	0.030036	0	5222	0.030865	0	5222	0.030495	0	5222	0.031078	0	5222	0.030187	0	5222	0.030109	0	5222	0.030705	0	5222	0.029643	0
5227	0.030087	0	5227	0.030917	0	5227	0.030547	0	5227	0.031131	0	5227	0.030238	0	5227	0.030161	0	5227	0.030757	0	5227	0.029694	0
5232	0.030137	0	5232	0.03097	0	5232	0.030599	0	5232	0.031183	0	5232	0.03029	0	5232	0.030212	0	5232	0.030809	0	5232	0.029744	0
5237	0.030188	0	5237	0.031023	0	5237	0.030652	0	5237	0.031235	0	5237	0.030342	0	5237	0.030264	0	5237	0.030862	0	5237	0.029795	0
5242	0.030239	0	5242	0.031076	0	5242	0.030704	0	5242	0.031287	0	5242	0.030393	0	5242	0.030316	0	5242	0.030914	0	5242	0.029846	0
5247	0.03029	0	5247	0.031129	0	5247	0.030756	0	5247	0.031339	0	5247	0.030445	0	5247	0.030367	0	5247	0.030966	0	5247	0.029897	0
5252	0.030341	0	5252	0.031181	0	5252	0.030808	0	5252	0.031392	0	5252	0.030497	0	5252	0.030419	0	5252	0.031019	0	5252	0.029948	0
5257	0.030393	0	5257	0.031234	0	5257	0.030861	0	5257	0.031444	0	5257	0.030549	0	5257	0.030471	0	5257	0.031072	0	5257	0.029999	0
5262	0.030444	0	5262	0.031287	0	5262	0.030913	0	5262	0.031496	0	5262	0.030601	0	5262	0.030523	0	5262	0.031124	0	5262	0.03005	0
5267	0.030495	0	5267	0.03134	0	5267	0.030966	0	5267	0.031549	0	5267	0.030653	0	5267	0.030575	0	5267	0.031177	0	5267	0.030101	0
5272	0.030546	0	5272	0.031393	0	5272	0.031018	0	5272	0.031601	0	5272	0.030705	0	5272	0.030627	0	5272	0.031229	0	5272	0.030152	0
5277	0.030597	0	5277	0.031446	0	5277	0.031071	0	5277	0.031654	0	5277	0.030757	0	5277	0.030679	0	5277	0.031282	0	5277	0.030203	0
5282	0.030649	0	5282	0.0315	0	5282	0.031123	0	5282	0.031706	0	5282	0.030809	0	5282	0.030731	0	5282	0.031335	0	5282	0.030254	0
5287	0.0307	0	5287	0.031553	0	5287	0.031176	0	5287	0.031759	0	5287	0.030861	0	5287	0.030783	0	5287	0.031388	0	5287	0.030305	0
5292	0.030752	0	5292	0.031606	0	5292	0.031229	0	5292	0.031811	0	5292	0.030913	0	5292	0.030835	0	5292	0.031441	0	5292	0.030357	0
5297	0.030803	0	5297	0.031659	0	5297	0.031282	0	5297	0.031864	0	5297	0.030965	0	5297	0.030887	0	5297	0.031493	0	5297	0.030408	0
5302	0.030855	0	5302	0.031713	0	5302	0.031334	0	5302	0.031917	0	5302	0.031018	0	5302	0.030939	0	5302	0.031546	0	5302	0.030459	0
5307	0.030906	0	5307	0.031766	0	5307	0.031387	0	5307	0.03197	0	5307	0.03107	0	5307	0.030991	0	5307	0.031599	0	5307	0.030511	0
5312	0.030958	0	5312	0.031819	0	5312	0.03144	0	5312	0.032022	0	5312	0.031122	0	5312	0.031043	0	5312	0.031652	0	5312	0.030562	0
5317	0.031009	0	5317	0.031873	0	5317	0.031493	0	5317	0.032075	0	5317	0.031175	0	5317	0.031096	0	5317	0.031705	0	5317	0.030613	0
5322	0.031061	0	5322	0.031926	0	5322	0.031546	0	5322	0.032128	0	5322	0.031227	0	5322	0.031148	0	5322	0.031759	0	5322	0.030665	0
5327	0.031113	0	5327	0.03198	0	5327	0.031599	0	5327	0.032181	0	5327	0.03128	0	5327	0.031201	0	5327	0.031812	0	5327	0.030717	0
5332	0.031164	0	5332	0.032034	0	5332	0.031652	0	5332	0.032234	0	5332	0.031332	0	5332	0.031253	0	5332	0.031865	0	5332	0.030768	0
5337	0.031216	0	5337	0.032087	0	5337	0.031705	0	5337	0.032287	0	5337	0.031385	0	5337	0.031305	0	5337	0.031918	0	5337	0.03082	0
5342	0.031268	0	5342	0.032141	0	5342	0.031758	0	5342	0.03234	0	5342	0.031437	0	5342	0.031358	0	5342	0.031972	0	5342	0.030871	0
5347	0.03132	0	5347	0.032195	0	5347	0.031811	0	5347	0.032393	0	5347	0.03149	0	5347	0.031411	0	5347	0.032025	0	5347	0.030923	0
5352	0.031372	0	5352	0.032248	0	5352	0.031865	0	5352	0.032446	0	5352	0.031543	0	5352	0.031463	0	5352	0.032078	0	5352	0.030975	0
5357	0.031424	0	5357	0.032302	0	5357	0.031918	0	5357	0.0325	0	5357	0.031596	0	5357	0.031516	0	5357	0.032132	0	5357	0.031027	0
5362	0.031476	0	5362	0.032356	0	5362	0.031971	0	5362	0.032553	0	5362	0.031648	0	5362	0.031569	0	5362	0.032185	0	5362	0.031079	0
5367	0.031528	0	5367	0.03241	0	5367	0.032025	0	5367	0.032606	0	5367	0.031701	0	5367	0.031621	0	5367	0.032239	0	5367	0.031131	0
5372	0.03158	0	5372	0.032464	0	5372	0.032078	0	5372	0.032659	0	5372	0.031754	0	5372	0.031674	0	5372	0.032292	0	5372	0.031183	0
5377	0.031632	0	5377	0.032518	0	5377	0.032131	0	5377	0.032713	0	5377	0.031807	0	5377	0.031727	0	5377	0.032346	0	5377	0.031235	0
5382	0.031684	0	5382	0.032572	0	5382	0.032185	0	5382	0.032766	0	5382	0.03186	0	5382	0.03178	0	5382	0.0324	0	5382	0.031287	0
5387	0.031737	0	5387	0.032626	0	5387	0.032239	0	5387	0.03282	0	5387	0.031913	0	5387	0.031833	0	5387	0.032453	0	5387	0.031339	0
5392	0.031789	0	5392	0.03268	0	5392	0.032292	0	5392	0.032873	0	5392	0.031966	0	5392	0.031886	0	5392	0.032507	0	5392	0.031391	0
5397	0.031841	0	5397	0.032734	0	5397	0.032346	0	5397	0.032927	0	5397	0.032019	0	5397	0.031939	0	5397	0.032561	0	5397	0.031443	0
5402	0.031894	0	5402	0.032789	0	5402	0.032399	0	5402	0.03298	0	5402	0.032072	0	5402	0.031992	0	5402	0.032615	0	5402	0.031495	0
5407	0.031946	0	5407	0.032843	0	5407	0.032453	0	5407	0.033034	0	5407	0.032126	0	5407	0.032045	0	5407	0.032668	0	5407	0.031547	0
5412	0.031998	0	5412	0.032897	0	5412	0.032507	0	5412	0.033088	0	5412	0.032179	0	5412	0.032098	0	5412	0.032722	0	5412	0.0316	0
5417	0.032051	0	5417	0.032951	0	5417	0.032561	0	5417	0.033141	0	5417	0.032232	0	5417	0.032151	0	5417	0.032776	0	5417	0.031652	0
5422	0.032104	0	5422	0.033006	0	5422	0.032615	0	5422	0.033195	0	5422	0.032285	0	5422	0.032204	0	5422	0.03283	0	5422	0.031704	0
5427	0.032156	0	5427	0.03306	0	5427	0.032669	0	5427	0.033249	0	5427	0.032339	0	5427	0.032258	0	5427	0.032884	0	5427	0.031757	0
5432	0.032209	0	5432	0.033115	0	5432	0.032722	0	5432	0.033303	0	5432	0.032392	0	5432	0.032311	0	5432	0.032938	0	5432	0.031809	0
5437	0.032261	0	5437	0.033169	0	5437	0.032776	0	5437	0.033357	0	5437	0.032446	0	5437	0.032364	0	5437	0.032993	0	5437	0.031862	0
5442	0.032314	0	5442	0.033224	0	5442	0.03283	0	5442	0.033411	0	5442	0.032499	0	5442	0.032418	0	5442	0.033047	0	5442	0.031914	0
5447	0.032367	0	5447	0.033279	0	5447	0.032885	0	5447	0.033465	0	5447	0.032553	0	5447	0.032471	0	5447	0.033101	0	5447	0.031967	0
5452	0.03242	0	5452	0.033333	0	5452	0.032939	0	5452	0.033519	0	5452	0.032606	0	5452	0.032525	0	5452	0.033155	0	5452	0.03202	0
5457	0.032472	0	5457	0.033388	0	5457	0.032993	0	5457	0.033573	0	5457	0.03266	0	5457	0.032578	0	5457	0.03321	0	5457	0.032072	0
5462	0.032525	0	5462	0.033443	0	5462	0.033047	0	5462	0.033627	0	5462	0.032714	0	5462	0.032632	0	5462	0.033264	0	5462	0.032125	0
5467	0.032578	0	5467	0.033498	0	5467	0.033101	0	5467	0.033681	0	5467	0.032767	0	5467	0.032685	0	5467	0.033318	0	5467	0.032178	0
5472	0.032631	0	5472	0.033552	0	5472	0.033156	0	5472	0.033735	0	5472	0.032821	0	5472	0.032739	0	5472	0.033373	0	5472	0.032231	0
5477	0.032684	0	5477	0.033607	0	5477	0.03321	0	5477	0.033789	0	5477	0.032875	0	5477	0.032793	0	5477	0.033427	0	5477	0.032284	0
5482	0.032737	0	5482	0.033662	0	5482	0.033264	0	5482	0.033844	0	5482	0.032929	0	5482	0.032847	0	5482	0.033482	0	5482	0.032336	0
5487	0.03279	0	5487	0.033717	0	5487	0.033319	0	5487	0.033898	0	5487	0.032983	0	5487	0.0329	0	5487	0.033536	0	5487	0.032389	0
5492	0.032844	0	5492	0.033772	0	5492	0.033373	0	5492	0.033952	0	5492	0.033037	0	5492	0.032954	0	5492	0.033591	0	5492	0.032442	0
5497	0.032897	0	5497	0.033827	0	5497	0.033428	0	5497	0.034007	0	5497	0.033091	0	5497	0.033008	0	5497	0.033646	0	5497	0.032495	0
5502	0.03295	0	5502	0.033882	0	5502	0.033482	0	5502	0.034061	0	5502	0.033145	0	5502	0.033062	0	5502	0.033701	0	5502	0.032549	0
5507	0.033003	0	5507	0.033938	0	5507	0.033537	0	5507	0.034116	0	5507	0.033199	0	5507	0.033116	0	5507	0.033755	0	5507	0.032602	0
5512	0.033057	0	5512	0.033993	0	5512	0.033592	0	5512	0.03417	0	5512	0.033253	0	5512	0.03317	0	5512	0.03381	0	5512	0.032655	0
5517	0.03311	0	5517	0.034048	0	5517	0.033646	0	5517	0.034225	0	5517	0.033307	0	5517	0.033224	0	5517	0.033865	0	5517	0.032708	0
5522	0.033163	0	5522	0.034103	0	5522	0.033701	0	5522	0.03428	0	5522	0.033361	0	5522	0.033278	0	5522	0.03392	0	5522	0.032761	0
5527	0.033217	0	5527	0.034159	0	5527	0.033756	0	5527	0.034334	0	5527	0.033415	0	5527	0.033332	0	5527	0.033975	0	5527	0.032815	0
5532	0.03327	0	5532	0.034214	0	5532	0.033811	0	5532	0.034389	0	5532	0.03347	0	5532	0.033387	0	5532	0.03403	0	5532	0.032868	0
5537	0.033324	0	5537	0.03427	0	5537	0.033866	0	5537	0.034444	0	5537	0.033524	0	5537	0.033441	0	5537	0.034085	0	5537	0.032921	0
5542	0.033377	0	5542	0.034325	0	5542	0.033921	0	5542	0.034499	0	5542	0.033578	0	5542	0.033495	0	5542	0.03414	0	5542	0.032975	0
5547	0.033431	0	5547	0.034381	0	5547	0.033976	0	5547	0.034553	0	5547	0.033633	0	5547	0.03355	0	5547	0.034195	0	5547	0.033028	0
5552	0.033485	0	5552	0.034436	0	5552	0.034031	0	5552	0.034608	0	5552	0.033687	0	5552	0.033604	0	5552	0.03425	0	5552	0.033082	0
5557	0.033538	0	5557	0.034492	0	5557	0.034086	0	5557	0.034663	0	5557	0.033742	0	5557	0.033658	0	5557	0.034305	0	5557	0.033135	0
5562	0.033592	0	5562	0.034547	0	5562	0.034141	0	5562	0.034718	0	5562	0.033796	0	5562	0.033713	0	5562	0.034361	0	5562	0.033189	0
5567	0.033646	0	5567	0.034603	0	5567	0.034196	0	5567	0.034773	0	5567	0.033851	0	5567	0.033767	0	5567	0.034416	0	5567	0.033242	0
5572	0.0337	0	5572	0.034659	0	5572	0.034251	0	5572	0.034828	0	5572	0.033906	0	5572	0.033822	0	5572	0.034471	0	5572	0.033296	0
5577	0.033753	0	5577	0.034715	0	5577	0.034306	0	5577	0.034883	0	5577	0.03396	0	5577	0.033876	0	5577	0.034527	0	5577	0.03335	0
5582	0.033807	0	5582	0.03477	0	5582	0.034362	0	5582	0.034939	0	5582	0.034015	0	5582	0.033931	0	5582	0.034582	0	5582	0.033404	0
5587	0.033861	0	5587	0.034826	0	5587	0.034417	0	5587	0.034994	0	5587	0.03407	0	5587	0.033986	0	5587	0.034638	0	5587	0.033457	0
5592	0.033915	0	5592	0.034882	0	5592	0.034472	0	5592	0.035049	0	5592	0.034125	0	5592	0.034041	0	5592	0.034693	0	5592	0.033511	0
5597	0.033969	0	5597	0.034938	0	5597	0.034528	0	5597	0.035104	0	5597	0.03418	0	5597	0.034095	0	5597	0.034749	0	5597	0.033565	0
5602	0.034023	0	5602	0.034994	0	5602	0.034583	0	5602	0.03516	0	5602	0.034235	0	5602	0.03415	0	5602	0.034804	0	5602	0.033619	0
5607	0.034078	0	5607	0.03505	0	5607	0.034639	0	5607	0.035215	0	5607	0.034289	0	5607	0.034205	0	5607	0.03486	0	5607	0.033673	0
5612	0.034132	0	5612	0.035106	0	5612	0.034694	0	5612	0.035271	0	5612	0.034344	0	5612	0.03426	0	5612	0.034916	0	5612	0.033727	0
5617	0.034186	0	5617	0.035163	0	5617	0.03475	0	5617	0.035326	0	5617	0.0344	0	5617	0.034315	0	5617	0.034971	0	5617	0.033781	0
5622	0.03424	0	5622	0.035219	0	5622	0.034805	0	5622	0.035381	0	5622	0.034455	0	5622	0.03437	0	5622	0.035027	0	5622	0.033835	0
5627	0.034295	0	5627	0.035275	0	5627	0.034861	0	5627	0.035437	0	5627	0.03451	0	5627	0.034425	0	5627	0.035083	0	5627	0.03389	0
5632	0.034349	0	5632	0.035331	0	5632	0.034917	0	5632	0.035493	0	5632	0.034565	0	5632	0.03448	0	5632	0.035139	0	5632	0.033944	0
5637	0.034403	0	5637	0.035388	0	5637	0.034973	0	5637	0.035548	0	5637	0.03462	0	5637	0.034535	0	5637	0.035195	0	5637	0.033998	0
5642	0.034458	0	5642	0.035444	0	5642	0.035028	0	5642	0.035604	0	5642	0.034675	0	5642	0.03459	0	5642	0.035251	0	5642	0.034052	0
5647	0.034512	0	5647	0.0355	0	5647	0.035084	0	5647	0.03566	0	5647	0.034731	0	5647	0.034646	0	5647	0.035307	0	5647	0.034107	0
5652	0.034567	0	5652	0.035557	0	5652	0.03514	0	5652	0.035715	0	5652	0.034786	0	5652	0.034701	0	5652	0.035363	0	5652	0.034161	0
5657	0.034621	0	5657	0.035613	0	5657	0.035196	0	5657	0.035771	0	5657	0.034841	0	5657	0.034756	0	5657	0.035419	0	5657	0.034215	0
5662	0.034676	0	5662	0.03567	0	5662	0.035252	0	5662	0.035827	0	5662	0.034897	0	5662	0.034811	0	5662	0.035475	0	5662	0.03427	0
5667	0.03473	0	5667	0.035727	0	5667	0.035308	0	5667	0.035883	0	5667	0.034952	0	5667	0.034867	0	5667	0.035531	0	5667	0.034324	0
5672	0.034785	0	5672	0.035783	0	5672	0.035364	0	5672	0.035939	0	5672	0.035008	0	5672	0.034922	0	5672	0.035587	0	5672	0.034379	0
5677	0.03484	0	5677	0.03584	0	5677	0.03542	0	5677	0.035995	0	5677	0.035064	0	5677	0.034978	0	5677	0.035644	0	5677	0.034434	0
5682	0.034895	0	5682	0.035897	0	5682	0.035477	0	5682	0.036051	0	5682	0.035119	0	5682	0.035033	0	5682	0.0357	0	5682	0.034488	0
5687	0.034949	0	5687	0.035953	0	5687	0.035533	0	5687	0.036107	0	5687	0.035175	0	5687	0.035089	0	5687	0.035756	0	5687	0.034543	0
5692	0.035004	0	5692	0.03601	0	5692	0.035589	0	5692	0.036163	0	5692	0.035231	0	5692	0.035144	0	5692	0.035813	0	5692	0.034598	0
5697	0.035059	0	5697	0.036067	0	5697	0.035645	0	5697	0.036219	0	5697	0.035286	0	5697	0.0352	0	5697	0.035869	0	5697	0.034652	0
5702	0.035114	0	5702	0.036124	0	5702	0.035702	0	5702	0.036276	0	5702	0.035342	0	5702	0.035256	0	5702	0.035926	0	5702	0.034707	0
5707	0.035169	0	5707	0.036181	0	5707	0.035758	0	5707	0.036332	0	5707	0.035398	0	5707	0.035312	0	5707	0.035982	0	5707	0.034762	0
5712	0.035224	0	5712	0.036238	0	5712	0.035815	0	5712	0.036388	0	5712	0.035454	0	5712	0.035367	0	5712	0.036039	0	5712	0.034817	0
5717	0.035279	0	5717	0.036295	0	5717	0.035871	0	5717	0.036444	0	5717	0.03551	0	5717	0.035423	0	5717	0.036096	0	5717	0.034872	1
5722	0.035334	0	5722	0.036352	0	5722	0.035928	0	5722	0.036501	0	5722	0.035566	0	5722	0.035479	0	5722	0.036152	0	5722	0.034927	0
5727	0.03539	0	5727	0.036409	0	5727	0.035984	0	5727	0.036557	0	5727	0.035622	0	5727	0.035535	0	5727	0.036209	0	5727	0.034982	0
5732	0.035445	0	5732	0.036466	0	5732	0.036041	0	5732	0.036614	0	5732	0.035678	0	5732	0.035591	0	5732	0.036266	0	5732	0.035037	0
5737	0.0355	0	5737	0.036524	0	5737	0.036097	0	5737	0.03667	0	5737	0.035734	0	5737	0.035647	0	5737	0.036322	0	5737	0.035092	0
5742	0.035555	0	5742	0.036581	0	5742	0.036154	0	5742	0.036727	0	5742	0.03579	0	5742	0.035703	0	5742	0.036379	0	5742	0.035147	0
5747	0.035611	0	5747	0.036638	0	5747	0.036211	0	5747	0.036783	0	5747	0.035846	0	5747	0.035759	0	5747	0.036436	0	5747	0.035202	0
5752	0.035666	0	5752	0.036696	0	5752	0.036268	0	5752	0.03684	0	5752	0.035902	0	5752	0.035815	0	5752	0.036493	0	5752	0.035258	0
5757	0.035721	0	5757	0.036753	0	5757	0.036324	0	5757	0.036897	0	5757	0.035959	0	5757	0.035871	0	5757	0.03655	0	5757	0.035313	0
5762	0.035777	0	5762	0.03681	0	5762	0.036381	0	5762	0.036953	0	5762	0.036015	0	5762	0.035928	0	5762	0.036607	0	5762	0.035368	0
5767	0.035832	0	5767	0.036868	0	5767	0.036438	0	5767	0.03701	0	5767	0.036071	0	5767	0.035984	0	5767	0.036664	0	5767	0.035424	0
5772	0.035888	0	5772	0.036926	0	5772	0.036495	0	5772	0.037067	0	5772	0.036128	0	5772	0.03604	0	5772	0.036721	0	5772	0.035479	0
5777	0.035943	0	5777	0.036983	0	5777	0.036552	0	5777	0.037124	0	5777	0.036184	0	5777	0.036097	0	5777	0.036779	0	5777	0.035535	0
5782	0.035999	0	5782	0.037041	0	5782	0.036609	0	5782	0.037181	0	5782	0.036241	0	5782	0.036153	0	5782	0.036836	0	5782	0.03559	0
5787	0.036055	0	5787	0.037098	0	5787	0.036666	0	5787	0.037238	0	5787	0.036297	0	5787	0.036209	0	5787	0.036893	0	5787	0.035646	0
5792	0.036111	0	5792	0.037156	0	5792	0.036724	0	5792	0.037295	0	5792	0.036354	0	5792	0.036266	0	5792	0.03695	0	5792	0.035701	0
5797	0.036166	0	5797	0.037214	0	5797	0.036781	0	5797	0.037352	0	5797	0.036411	0	5797	0.036322	0	5797	0.037008	0	5797	0.035757	0
5802	0.036222	0	5802	0.037272	0	5802	0.036838	0	5802	0.037409	0	5802	0.036467	0	5802	0.036379	0	5802	0.037065	0	5802	0.035812	0
5807	0.036278	0	5807	0.03733	0	5807	0.036895	0	5807	0.037466	0	5807	0.036524	0	5807	0.036436	0	5807	0.037122	0	5807	0.035868	0
5812	0.036334	0	5812	0.037387	0	5812	0.036953	0	5812	0.037523	0	5812	0.036581	0	5812	0.036492	0	5812	0.03718	0	5812	0.035924	0
5817	0.03639	0	5817	0.037445	0	5817	0.03701	0	5817	0.03758	0	5817	0.036638	0	5817	0.036549	0	5817	0.037237	0	5817	0.03598	0
5822	0.036446	0	5822	0.037503	0	5822	0.037067	0	5822	0.037638	0	5822	0.036694	0	5822	0.036606	0	5822	0.037295	0	5822	0.036036	0
5827	0.036502	0	5827	0.037561	0	5827	0.037125	0	5827	0.037695	0	5827	0.036751	0	5827	0.036663	0	5827	0.037353	0	5827	0.036091	0
5832	0.036558	0	5832	0.03762	0	5832	0.037182	0	5832	0.037752	0	5832	0.036808	0	5832	0.036719	0	5832	0.03741	0	5832	0.036147	0
5837	0.036614	0	5837	0.037678	0	5837	0.03724	0	5837	0.03781	0	5837	0.036865	0	5837	0.036776	0	5837	0.037468	0	5837	0.036203	0
5842	0.03667	0	5842	0.037736	0	5842	0.037298	0	5842	0.037867	0	5842	0.036922	0	5842	0.036833	0	5842	0.037526	0	5842	0.036259	0
5847	0.036726	0	5847	0.037794	0	5847	0.037355	0	5847	0.037925	0	5847	0.036979	0	5847	0.03689	0	5847	0.037584	0	5847	0.036315	0
5852	0.036783	0	5852	0.037852	0	5852	0.037413	0	5852	0.037982	0	5852	0.037036	0	5852	0.036947	0	5852	0.037641	0	5852	0.036372	0
5857	0.036839	0	5857	0.037911	0	5857	0.037471	0	5857	0.03804	0	5857	0.037094	0	5857	0.037004	0	5857	0.037699	0	5857	0.036428	0
5862	0.036895	0	5862	0.037969	0	5862	0.037528	0	5862	0.038097	0	5862	0.037151	0	5862	0.037061	0	5862	0.037757	0	5862	0.036484	0
5867	0.036951	0	5867	0.038027	0	5867	0.037586	0	5867	0.038155	0	5867	0.037208	0	5867	0.037119	0	5867	0.037815	0	5867	0.03654	0
5872	0.037008	0	5872	0.038086	0	5872	0.037644	0	5872	0.038213	0	5872	0.037265	0	5872	0.037176	0	5872	0.037873	0	5872	0.036596	0
5877	0.037064	0	5877	0.038144	0	5877	0.037702	0	5877	0.03827	0	5877	0.037323	0	5877	0.037233	0	5877	0.037931	0	5877	0.036653	0
5882	0.037121	0	5882	0.038203	0	5882	0.03776	0	5882	0.038328	0	5882	0.03738	0	5882	0.03729	0	5882	0.037989	0	5882	0.036709	0
5887	0.037177	0	5887	0.038261	0	5887	0.037818	0	5887	0.038386	0	5887	0.037437	0	5887	0.037348	0	5887	0.038047	0	5887	0.036766	0
5892	0.037234	0	5892	0.03832	0	5892	0.037876	0	5892	0.038444	0	5892	0.037495	0	5892	0.037405	0	5892	0.038106	0	5892	0.036822	0
5897	0.037291	0	5897	0.038379	0	5897	0.037934	0	5897	0.038502	0	5897	0.037552	0	5897	0.037462	0	5897	0.038164	0	5897	0.036879	0
5902	0.037347	0	5902	0.038437	0	5902	0.037992	0	5902	0.03856	0	5902	0.03761	0	5902	0.03752	0	5902	0.038222	0	5902	0.036935	0
5907	0.037404	0	5907	0.038496	0	5907	0.03805	0	5907	0.038618	0	5907	0.037668	0	5907	0.037577	0	5907	0.03828	0	5907	0.036992	0
5912	0.037461	0	5912	0.038555	0	5912	0.038109	0	5912	0.038676	0	5912	0.037725	0	5912	0.037635	0	5912	0.038339	0	5912	0.037048	0
5917	0.037517	0	5917	0.038614	0	5917	0.038167	0	5917	0.038734	0	5917	0.037783	0	5917	0.037693	0	5917	0.038397	0	5917	0.037105	0
5922	0.037574	0	5922	0.038673	0	5922	0.038225	0	5922	0.038792	0	5922	0.037841	0	5922	0.03775	0	5922	0.038456	0	5922	0.037162	0
5927	0.037631	0	5927	0.038732	0	5927	0.038284	0	5927	0.03885	0	5927	0.037898	0	5927	0.037808	0	5927	0.038514	0	5927	0.037218	0
5932	0.037688	0	5932	0.038791	0	5932	0.038342	0	5932	0.038908	0	5932	0.037956	0	5932	0.037866	0	5932	0.038573	0	5932	0.037275	0
5937	0.037745	0	5937	0.03885	0	5937	0.0384	0	5937	0.038966	0	5937	0.038014	0	5937	0.037923	0	5937	0.038631	0	5937	0.037332	0
5942	0.037802	0	5942	0.038909	0	5942	0.038459	0	5942	0.039025	0	5942	0.038072	0	5942	0.037981	0	5942	0.03869	0	5942	0.037389	0
5947	0.037859	0	5947	0.038968	0	5947	0.038517	0	5947	0.039083	0	5947	0.03813	0	5947	0.038039	0	5947	0.038749	0	5947	0.037446	0
5952	0.037916	0	5952	0.039027	0	5952	0.038576	0	5952	0.039141	0	5952	0.038188	0	5952	0.038097	0	5952	0.038807	0	5952	0.037503	0
5957	0.037973	0	5957	0.039086	0	5957	0.038635	0	5957	0.0392	0	5957	0.038246	0	5957	0.038155	0	5957	0.038866	0	5957	0.03756	0
5962	0.038031	0	5962	0.039145	0	5962	0.038693	0	5962	0.039258	0	5962	0.038304	0	5962	0.038213	0	5962	0.038925	0	5962	0.037617	0
5967	0.038088	0	5967	0.039205	0	5967	0.038752	0	5967	0.039317	0	5967	0.038362	0	5967	0.038271	0	5967	0.038984	0	5967	0.037674	0
5972	0.038145	0	5972	0.039264	0	5972	0.038811	0	5972	0.039375	0	5972	0.03842	0	5972	0.038329	0	5972	0.039043	0	5972	0.037731	0
5977	0.038202	0	5977	0.039323	0	5977	0.03887	0	5977	0.039434	0	5977	0.038479	0	5977	0.038387	0	5977	0.039102	0	5977	0.037788	0
5982	0.03826	0	5982	0.039383	0	5982	0.038928	0	5982	0.039493	0	5982	0.038537	0	5982	0.038445	0	5982	0.039161	0	5982	0.037846	0
5987	0.038317	0	5987	0.039442	0	5987	0.038987	0	5987	0.039551	0	5987	0.038595	0	5987	0.038503	0	5987	0.03922	0	5987	0.037903	0
5992	0.038375	0	5992	0.039502	0	5992	0.039046	0	5992	0.03961	0	5992	0.038654	0	5992	0.038562	0	5992	0.039279	0	5992	0.03796	0
5997	0.038432	0	5997	0.039561	0	5997	0.039105	0	5997	0.039669	0	5997	0.038712	0	5997	0.03862	0	5997	0.039338	0	5997	0.038018	0
6002	0.03849	0	6002	0.039621	0	6002	0.039164	0	6002	0.039728	0	6002	0.03877	0	6002	0.038678	0	6002	0.039397	0	6002	0.038075	0
6007	0.038547	0	6007	0.039681	0	6007	0.039223	0	6007	0.039787	0	6007	0.038829	0	6007	0.038737	0	6007	0.039456	0	6007	0.038132	0
6012	0.038605	0	6012	0.03974	0	6012	0.039282	0	6012	0.039845	0	6012	0.038887	0	6012	0.038795	0	6012	0.039515	0	6012	0.03819	0
6017	0.038662	0	6017	0.0398	1	6017	0.039341	0	6017	0.039904	0	6017	0.038946	0	6017	0.038854	0	6017	0.039575	0	6017	0.038248	0
6022	0.03872	0	6022	0.03986	0	6022	0.039401	0	6022	0.039963	0	6022	0.039005	0	6022	0.038912	0	6022	0.039634	0	6022	0.038305	0
6027	0.038778	0	6027	0.03992	0	6027	0.03946	0	6027	0.040022	0	6027	0.039063	0	6027	0.038971	0	6027	0.039694	0	6027	0.038363	0
6032	0.038836	0	6032	0.03998	0	6032	0.039519	0	6032	0.040082	0	6032	0.039122	0	6032	0.039029	0	6032	0.039753	0	6032	0.03842	0
6037	0.038893	0	6037	0.040039	0	6037	0.039579	0	6037	0.040141	0	6037	0.039181	0	6037	0.039088	0	6037	0.039812	0	6037	0.038478	0
6042	0.038951	0	6042	0.040099	0	6042	0.039638	0	6042	0.0402	0	6042	0.03924	0	6042	0.039147	0	6042	0.039872	0	6042	0.038536	0
6047	0.039009	0	6047	0.040159	0	6047	0.039697	0	6047	0.040259	0	6047	0.039298	0	6047	0.039205	0	6047	0.039932	0	6047	0.038594	0
6052	0.039067	0	6052	0.04022	0	6052	0.039757	0	6052	0.040318	0	6052	0.039357	0	6052	0.039264	0	6052	0.039991	0	6052	0.038652	0
6057	0.039125	0	6057	0.04028	0	6057	0.039816	0	6057	0.040378	0	6057	0.039416	0	6057	0.039323	0	6057	0.040051	0	6057	0.038709	0
6062	0.039183	0	6062	0.04034	0	6062	0.039876	0	6062	0.040437	0	6062	0.039475	0	6062	0.039382	0	6062	0.04011	0	6062	0.038767	0
6067	0.039241	0	6067	0.0404	0	6067	0.039935	0	6067	0.040496	0	6067	0.039534	0	6067	0.039441	0	6067	0.04017	0	6067	0.038825	0
6072	0.039299	0	6072	0.04046	0	6072	0.039995	0	6072	0.040556	0	6072	0.039593	0	6072	0.0395	0	6072	0.04023	0	6072	0.038883	0
6077	0.039358	0	6077	0.04052	0	6077	0.040055	0	6077	0.040615	0	6077	0.039652	0	6077	0.039559	0	6077	0.04029	0	6077	0.038941	0
6082	0.039416	0	6082	0.040581	0	6082	0.040115	0	6082	0.040675	0	6082	0.039711	0	6082	0.039618	0	6082	0.04035	0	6082	0.038999	0
6087	0.039474	0	6087	0.040641	0	6087	0.040174	0	6087	0.040734	0	6087	0.039771	0	6087	0.039677	0	6087	0.04041	0	6087	0.039058	0
6092	0.039532	0	6092	0.040702	0	6092	0.040234	0	6092	0.040794	0	6092	0.03983	0	6092	0.039736	0	6092	0.04047	0	6092	0.039116	0
6097	0.039591	0	6097	0.040762	0	6097	0.040294	0	6097	0.040854	0	6097	0.039889	0	6097	0.039795	0	6097	0.04053	0	6097	0.039174	0
6102	0.039649	0	6102	0.040823	0	6102	0.040354	0	6102	0.040913	0	6102	0.039948	0	6102	0.039854	0	6102	0.04059	0	6102	0.039232	0
6107	0.039708	0	6107	0.040883	0	6107	0.040414	0	6107	0.040973	0	6107	0.040008	0	6107	0.039914	0	6107	0.04065	0	6107	0.039291	0
6112	0.039766	0	6112	0.040944	0	6112	0.040474	0	6112	0.041033	0	6112	0.040067	0	6112	0.039973	0	6112	0.04071	0	6112	0.039349	0
6117	0.039825	0	6117	0.041004	0	6117	0.040534	0	6117	0.041093	0	6117	0.040127	0	6117	0.040032	0	6117	0.04077	0	6117	0.039407	0
6122	0.039883	0	6122	0.041065	0	6122	0.040594	0	6122	0.041152	0	6122	0.040186	0	6122	0.040092	0	6122	0.04083	0	6122	0.039466	0
6127	0.039942	0	6127	0.041126	0	6127	0.040654	0	6127	0.041212	0	6127	0.040246	0	6127	0.040151	0	6127	0.040891	0	6127	0.039524	0
6132	0.04	0	6132	0.041187	0	6132	0.040714	0	6132	0.041272	0	6132	0.040305	0	6132	0.040211	0	6132	0.040951	0	6132	0.039583	0
6137	0.040059	0	6137	0.041247	0	6137	0.040775	0	6137	0.041332	0	6137	0.040365	0	6137	0.04027	0	6137	0.041011	0	6137	0.039641	0
6142	0.040118	0	6142	0.041308	0	6142	0.040835	0	6142	0.041392	0	6142	0.040425	0	6142	0.04033	0	6142	0.041072	0	6142	0.0397	0
6147	0.040177	0	6147	0.041369	0	6147	0.040895	0	6147	0.041452	0	6147	0.040484	0	6147	0.040389	0	6147	0.041132	0	6147	0.039759	0
6152	0.040235	0	6152	0.04143	0	6152	0.040955	0	6152	0.041513	0	6152	0.040544	0	6152	0.040449	0	6152	0.041193	0	6152	0.039817	0
6157	0.040294	0	6157	0.041491	0	6157	0.041016	0	6157	0.041573	0	6157	0.040604	0	6157	0.040509	0	6157	0.041253	0	6157	0.039876	0
6162	0.040353	0	6162	0.041552	0	6162	0.041076	0	6162	0.041633	0	6162	0.040664	0	6162	0.040569	0	6162	0.041314	0	6162	0.039935	0
6167	0.040412	0	6167	0.041613	0	6167	0.041137	0	6167	0.041693	0	6167	0.040724	0	6167	0.040628	0	6167	0.041374	0	6167	0.039994	0
6172	0.040471	0	6172	0.041674	0	6172	0.041197	0	6172	0.041754	0	6172	0.040784	0	6172	0.040688	0	6172	0.041435	0	6172	0.040053	0
6177	0.04053	0	6177	0.041736	0	6177	0.041258	0	6177	0.041814	0	6177	0.040844	0	6177	0.040748	0	6177	0.041496	0	6177	0.040112	0
6182	0.040589	0	6182	0.041797	0	6182	0.041319	0	6182	0.041874	0	6182	0.040904	0	6182	0.040808	0	6182	0.041557	0	6182	0.040171	0
6187	0.040648	0	6187	0.041858	0	6187	0.041379	0	6187	0.041935	0	6187	0.040964	0	6187	0.040868	0	6187	0.041617	0	6187	0.04023	0
6192	0.040707	0	6192	0.041919	0	6192	0.04144	0	6192	0.041995	0	6192	0.041024	0	6192	0.040928	0	6192	0.041678	0	6192	0.040289	0
6197	0.040767	0	6197	0.041981	0	6197	0.041501	0	6197	0.042056	0	6197	0.041084	0	6197	0.040988	0	6197	0.041739	0	6197	0.040348	0
6202	0.040826	0	6202	0.042042	0	6202	0.041561	0	6202	0.042116	0	6202	0.041144	0	6202	0.041048	0	6202	0.0418	0	6202	0.040407	0
6207	0.040885	0	6207	0.042104	0	6207	0.041622	0	6207	0.042177	0	6207	0.041204	0	6207	0.041108	0	6207	0.041861	0	6207	0.040466	0
6212	0.040944	0	6212	0.042165	0	6212	0.041683	0	6212	0.042238	0	6212	0.041265	0	6212	0.041168	0	6212	0.041922	0	6212	0.040525	0
6217	0.041004	0	6217	0.042227	0	6217	0.041744	0	6217	0.042298	0	6217	0.041325	0	6217	0.041229	0	6217	0.041983	0	6217	0.040585	0
6222	0.041063	0	6222	0.042288	0	6222	0.041805	0	6222	0.042359	0	6222	0.041385	0	6222	0.041289	0	6222	0.042044	0	6222	0.040644	0
6227	0.041123	0	6227	0.04235	0	6227	0.041866	0	6227	0.04242	0	6227	0.041446	0	6227	0.041349	0	6227	0.042106	0	6227	0.040703	0
6232	0.041182	0	6232	0.042411	0	6232	0.041927	0	6232	0.042481	0	6232	0.041506	0	6232	0.04141	0	6232	0.042167	0	6232	0.040763	0
6237	0.041242	0	6237	0.042473	0	6237	0.041988	0	6237	0.042541	0	6237	0.041567	0	6237	0.04147	0	6237	0.042228	0	6237	0.040822	0
6242	0.041301	0	6242	0.042535	0	6242	0.042049	0	6242	0.042602	0	6242	0.041627	0	6242	0.041531	0	6242	0.042289	0	6242	0.040882	0
6247	0.041361	0	6247	0.042597	0	6247	0.042111	0	6247	0.042663	0	6247	0.041688	0	6247	0.041591	0	6247	0.042351	0	6247	0.040941	0
6252	0.041421	0	6252	0.042659	0	6252	0.042172	0	6252	0.042724	0	6252	0.041749	0	6252	0.041652	0	6252	0.042412	0	6252	0.041001	0
6257	0.04148	0	6257	0.04272	0	6257	0.042233	0	6257	0.042785	0	6257	0.041809	0	6257	0.041712	0	6257	0.042473	0	6257	0.04106	0
6262	0.04154	0	6262	0.042782	0	6262	0.042295	0	6262	0.042846	0	6262	0.04187	0	6262	0.041773	0	6262	0.042535	0	6262	0.04112	0
6267	0.0416	0	6267	0.042844	0	6267	0.042356	0	6267	0.042908	0	6267	0.041931	0	6267	0.041833	0	6267	0.042596	0	6267	0.04118	0
6272	0.04166	0	6272	0.042906	0	6272	0.042417	0	6272	0.042969	0	6272	0.041992	0	6272	0.041894	0	6272	0.042658	0	6272	0.041239	0
6277	0.04172	0	6277	0.042968	0	6277	0.042479	0	6277	0.04303	0	6277	0.042053	0	6277	0.041955	0	6277	0.04272	0	6277	0.041299	0
6282	0.04178	0	6282	0.043031	0	6282	0.04254	0	6282	0.043091	0	6282	0.042113	0	6282	0.042016	0	6282	0.042781	0	6282	0.041359	0
6287	0.04184	0	6287	0.043093	0	6287	0.042602	0	6287	0.043153	0	6287	0.042174	0	6287	0.042077	0	6287	0.042843	0	6287	0.041419	0
6292	0.0419	0	6292	0.043155	0	6292	0.042664	0	6292	0.043214	0	6292	0.042235	0	6292	0.042137	0	6292	0.042905	0	6292	0.041479	0
6297	0.04196	0	6297	0.043217	0	6297	0.042725	0	6297	0.043275	0	6297	0.042296	0	6297	0.042198	0	6297	0.042967	0	6297	0.041539	0
6302	0.04202	0	6302	0.04328	0	6302	0.042787	0	6302	0.043337	0	6302	0.042357	0	6302	0.042259	0	6302	0.043028	0	6302	0.041599	0
6307	0.04208	0	6307	0.043342	0	6307	0.042849	0	6307	0.043398	0	6307	0.042419	0	6307	0.04232	0	6307	0.04309	0	6307	0.041659	0
6312	0.04214	0	6312	0.043404	0	6312	0.04291	0	6312	0.04346	0	6312	0.04248	0	6312	0.042382	0	6312	0.043152	0	6312	0.041719	0
6317	0.0422	0	6317	0.043467	0	6317	0.042972	0	6317	0.043521	0	6317	0.042541	0	6317	0.042443	0	6317	0.043214	0	6317	0.041779	0
6322	0.042261	0	6322	0.043529	0	6322	0.043034	0	6322	0.043583	0	6322	0.042602	0	6322	0.042504	0	6322	0.043276	0	6322	0.041839	0
6327	0.042321	0	6327	0.043592	0	6327	0.043096	0	6327	0.043645	0	6327	0.042664	0	6327	0.042565	0	6327	0.043338	0	6327	0.0419	0
6332	0.042381	0	6332	0.043654	0	6332	0.043158	0	6332	0.043706	0	6332	0.042725	0	6332	0.042626	0	6332	0.0434	0	6332	0.04196	0
6337	0.042442	0	6337	0.043717	0	6337	0.04322	0	6337	0.043768	0	6337	0.042786	0	6337	0.042688	0	6337	0.043462	0	6337	0.04202	0
6342	0.042502	0	6342	0.04378	0	6342	0.043282	0	6342	0.04383	0	6342	0.042848	0	6342	0.042749	0	6342	0.043525	0	6342	0.042081	0
6347	0.042563	0	6347	0.043842	0	6347	0.043344	0	6347	0.043892	0	6347	0.042909	0	6347	0.04281	0	6347	0.043587	0	6347	0.042141	0
6352	0.042623	0	6352	0.043905	0	6352	0.043406	0	6352	0.043953	0	6352	0.042971	0	6352	0.042872	0	6352	0.043649	0	6352	0.042201	0
6357	0.042684	0	6357	0.043968	0	6357	0.043468	0	6357	0.044015	0	6357	0.043032	0	6357	0.042933	0	6357	0.043711	0	6357	0.042262	0
6362	0.042744	0	6362	0.044031	0	6362	0.043531	0	6362	0.044077	0	6362	0.043094	0	6362	0.042995	0	6362	0.043774	0	6362	0.042322	0
6367	0.042805	0	6367	0.044093	0	6367	0.043593	0	6367	0.044139	0	6367	0.043156	0	6367	0.043056	0	6367	0.043836	0	6367	0.042383	0
6372	0.042866	0	6372	0.044156	0	6372	0.043655	0	6372	0.044201	0	6372	0.043217	0	6372	0.043118	0	6372	0.043899	0	6372	0.042444	0
6377	0.042927	0	6377	0.044219	0	6377	0.043718	0	6377	0.044263	0	6377	0.043279	0	6377	0.043179	0	6377	0.043961	0	6377	0.042504	0
6382	0.042987	0	6382	0.044282	0	6382	0.04378	0	6382	0.044326	0	6382	0.043341	0	6382	0.043241	0	6382	0.044024	0	6382	0.042565	0
6387	0.043048	0	6387	0.044345	0	6387	0.043842	0	6387	0.044388	0	6387	0.043403	0	6387	0.043303	0	6387	0.044086	0	6387	0.042626	0
6392	0.043109	0	6392	0.044409	0	6392	0.043905	0	6392	0.04445	0	6392	0.043465	0	6392	0.043365	0	6392	0.044149	0	6392	0.042686	0
6397	0.04317	0	6397	0.044472	0	6397	0.043967	0	6397	0.044512	0	6397	0.043526	0	6397	0.043426	0	6397	0.044212	0	6397	0.042747	0
6402	0.043231	0	6402	0.044535	0	6402	0.04403	0	6402	0.044575	0	6402	0.043588	0	6402	0.043488	0	6402	0.044274	0	6402	0.042808	0
6407	0.043292	0	6407	0.044598	0	6407	0.044093	0	6407	0.044637	0	6407	0.04365	0	6407	0.04355	0	6407	0.044337	0	6407	0.042869	0
6412	0.043353	0	6412	0.044661	0	6412	0.044155	0	6412	0.044699	0	6412	0.043713	0	6412	0.043612	0	6412	0.0444	0	6412	0.04293	0
6417	0.043414	0	6417	0.044725	0	6417	0.044218	0	6417	0.044762	0	6417	0.043775	0	6417	0.043674	0	6417	0.044463	0	6417	0.042991	0
6422	0.043475	0	6422	0.044788	0	6422	0.044281	0	6422	0.044824	0	6422	0.043837	0	6422	0.043736	0	6422	0.044526	0	6422	0.043052	0
6427	0.043536	0	6427	0.044852	0	6427	0.044344	0	6427	0.044887	0	6427	0.043899	0	6427	0.043798	0	6427	0.044589	0	6427	0.043113	0
6432	0.043598	0	6432	0.044915	0	6432	0.044406	0	6432	0.044949	0	6432	0.043961	0	6432	0.04386	0	6432	0.044652	0	6432	0.043174	0
6437	0.043659	0	6437	0.044979	0	6437	0.044469	0	6437	0.045012	0	6437	0.044023	0	6437	0.043923	0	6437	0.044715	0	6437	0.043235	0
6442	0.04372	0	6442	0.045042	0	6442	0.044532	0	6442	0.045075	0	6442	0.044086	0	6442	0.043985	0	6442	0.044778	0	6442	0.043297	0
6447	0.043782	0	6447	0.045106	0	6447	0.044595	0	6447	0.045137	0	6447	0.044148	0	6447	0.044047	0	6447	0.044841	0	6447	0.043358	0
6452	0.043843	0	6452	0.045169	0	6452	0.044658	0	6452	0.0452	0	6452	0.044211	0	6452	0.044109	0	6452	0.044904	0	6452	0.043419	0
6457	0.043904	0	6457	0.045233	0	6457	0.044721	0	6457	0.045263	0	6457	0.044273	0	6457	0.044172	0	6457	0.044967	0	6457	0.043481	0
6462	0.043966	0	6462	0.045297	0	6462	0.044784	0	6462	0.045326	0	6462	0.044335	0	6462	0.044234	0	6462	0.045031	0	6462	0.043542	0
6467	0.044027	0	6467	0.045361	0	6467	0.044848	0	6467	0.045389	0	6467	0.044398	0	6467	0.044297	0	6467	0.045094	0	6467	0.043603	0
6472	0.044089	0	6472	0.045424	0	6472	0.044911	0	6472	0.045451	0	6472	0.044461	0	6472	0.044359	0	6472	0.045157	0	6472	0.043665	0
6477	0.044151	0	6477	0.045488	0	6477	0.044974	0	6477	0.045514	0	6477	0.044523	0	6477	0.044422	0	6477	0.045221	0	6477	0.043726	0
6482	0.044212	0	6482	0.045552	0	6482	0.045037	0	6482	0.045577	0	6482	0.044586	0	6482	0.044484	0	6482	0.045284	0	6482	0.043788	0
6487	0.044274	0	6487	0.045616	0	6487	0.045101	0	6487	0.04564	0	6487	0.044649	0	6487	0.044547	0	6487	0.045347	0	6487	0.04385	0
6492	0.044336	0	6492	0.04568	0	6492	0.045164	0	6492	0.045704	0	6492	0.044711	0	6492	0.044609	0	6492	0.045411	0	6492	0.043911	0
6497	0.044398	0	6497	0.045744	0	6497	0.045228	0	6497	0.045767	0	6497	0.044774	0	6497	0.044672	0	6497	0.045475	0	6497	0.043973	0
6502	0.044459	0	6502	0.045808	0	6502	0.045291	0	6502	0.04583	0	6502	0.044837	0	6502	0.044735	0	6502	0.045538	0	6502	0.044035	0
6507	0.044521	0	6507	0.045872	0	6507	0.045355	0	6507	0.045893	0	6507	0.0449	0	6507	0.044798	0	6507	0.045602	0	6507	0.044097	0
6512	0.044583	0	6512	0.045937	0	6512	0.045418	0	6512	0.045956	0	6512	0.044963	0	6512	0.04486	0	6512	0.045666	0	6512	0.044158	0
6517	0.044645	0	6517	0.046001	0	6517	0.045482	0	6517	0.04602	0	6517	0.045026	0	6517	0.044923	0	6517	0.045729	0	6517	0.04422	0
6522	0.044707	0	6522	0.046065	0	6522	0.045545	0	6522	0.046083	0	6522	0.045089	0	6522	0.044986	0	6522	0.045793	0	6522	0.044282	0
6527	0.044769	0	6527	0.046129	0	6527	0.045609	0	6527	0.046146	0	6527	0.045152	0	6527	0.045049	0	6527	0.045857	0	6527	0.044344	0
6532	0.044831	0	6532	0.046194	0	6532	0.045673	0	6532	0.04621	0	6532	0.045215	0	6532	0.045112	0	6532	0.045921	0	6532	0.044406	0
6537	0.044893	0	6537	0.046258	0	6537	0.045737	0	6537	0.046273	0	6537	0.045278	0	6537	0.045175	0	6537	0.045985	0	6537	0.044468	0
6542	0.044956	0	6542	0.046323	0	6542	0.0458	0	6542	0.046337	0	6542	0.045341	0	6542	0.045238	0	6542	0.046049	0	6542	0.04453	0
6547	0.045018	0	6547	0.046387	0	6547	0.045864	0	6547	0.0464	0	6547	0.045405	0	6547	0.045302	0	6547	0.046113	0	6547	0.044592	0
6552	0.04508	0	6552	0.046452	0	6552	0.045928	0	6552	0.046464	0	6552	0.045468	0	6552	0.045365	0	6552	0.046177	0	6552	0.044655	0
6557	0.045142	0	6557	0.046516	0	6557	0.045992	0	6557	0.046528	0	6557	0.045531	0	6557	0.045428	0	6557	0.046241	0	6557	0.044717	0
6562	0.045205	0	6562	0.046581	0	6562	0.046056	0	6562	0.046591	0	6562	0.045595	0	6562	0.045491	0	6562	0.046305	0	6562	0.044779	0
6567	0.045267	0	6567	0.046646	0	6567	0.04612	0	6567	0.046655	0	6567	0.045658	0	6567	0.045555	0	6567	0.046369	0	6567	0.044841	0
6572	0.045329	0	6572	0.04671	0	6572	0.046184	0	6572	0.046719	0	6572	0.045722	0	6572	0.045618	0	6572	0.046433	0	6572	0.044904	0
6577	0.045392	0	6577	0.046775	0	6577	0.046248	0	6577	0.046783	0	6577	0.045785	0	6577	0.045681	0	6577	0.046498	0	6577	0.044966	0
6582	0.045454	0	6582	0.04684	0	6582	0.046313	0	6582	0.046847	0	6582	0.045849	0	6582	0.045745	0	6582	0.046562	0	6582	0.045028	0
6587	0.045517	0	6587	0.046905	0	6587	0.046377	0	6587	0.046911	0	6587	0.045912	0	6587	0.045808	0	6587	0.046626	0	6587	0.045091	0
6592	0.04558	0	6592	0.04697	0	6592	0.046441	0	6592	0.046975	0	6592	0.045976	0	6592	0.045872	0	6592	0.046691	0	6592	0.045153	0
6597	0.045642	0	6597	0.047035	0	6597	0.046505	0	6597	0.047039	0	6597	0.04604	0	6597	0.045935	0	6597	0.046755	0	6597	0.045216	0
6602	0.045705	0	6602	0.0471	0	6602	0.04657	0	6602	0.047103	0	6602	0.046103	0	6602	0.045999	0	6602	0.04682	0	6602	0.045279	0
6607	0.045768	0	6607	0.047165	0	6607	0.046634	0	6607	0.047167	0	6607	0.046167	0	6607	0.046063	0	6607	0.046884	0	6607	0.045341	0
6612	0.04583	0	6612	0.04723	0	6612	0.046699	0	6612	0.047231	0	6612	0.046231	0	6612	0.046126	0	6612	0.046949	0	6612	0.045404	0
6617	0.045893	0	6617	0.047295	0	6617	0.046763	0	6617	0.047295	0	6617	0.046295	0	6617	0.04619	0	6617	0.047014	0	6617	0.045467	0
6622	0.045956	0	6622	0.04736	0	6622	0.046828	0	6622	0.047359	0	6622	0.046359	0	6622	0.046254	0	6622	0.047078	0	6622	0.045529	0
6627	0.046019	0	6627	0.047425	0	6627	0.046892	0	6627	0.047424	0	6627	0.046423	0	6627	0.046318	0	6627	0.047143	0	6627	0.045592	0
6632	0.046082	0	6632	0.04749	0	6632	0.046957	0	6632	0.047488	0	6632	0.046487	0	6632	0.046382	0	6632	0.047208	0	6632	0.045655	0
6637	0.046145	0	6637	0.047556	0	6637	0.047022	0	6637	0.047552	0	6637	0.046551	0	6637	0.046446	0	6637	0.047272	0	6637	0.045718	0
6642	0.046208	0	6642	0.047621	0	6642	0.047086	0	6642	0.047617	0	6642	0.046615	0	6642	0.04651	0	6642	0.047337	0	6642	0.045781	0
6647	0.046271	0	6647	0.047687	0	6647	0.047151	0	6647	0.047681	0	6647	0.046679	0	6647	0.046574	0	6647	0.047402	0	6647	0.045844	0
6652	0.046334	0	6652	0.047752	0	6652	0.047216	0	6652	0.047746	0	6652	0.046743	0	6652	0.046638	0	6652	0.047467	0	6652	0.045907	0
6657	0.046397	0	6657	0.047817	0	6657	0.047281	0	6657	0.04781	0	6657	0.046807	0	6657	0.046702	0	6657	0.047532	0	6657	0.04597	0
6662	0.046461	0	6662	0.047883	0	6662	0.047346	0	6662	0.047875	0	6662	0.046871	0	6662	0.046766	0	6662	0.047597	0	6662	0.046033	0
6667	0.046524	0	6667	0.047949	0	6667	0.047411	0	6667	0.047939	0	6667	0.046936	0	6667	0.04683	0	6667	0.047662	0	6667	0.046096	0
6672	0.046587	0	6672	0.048014	0	6672	0.047475	0	6672	0.048004	0	6672	0.047	0	6672	0.046894	0	6672	0.047727	0	6672	0.04616	0
6677	0.04665	0	6677	0.04808	0	6677	0.047541	0	6677	0.048069	0	6677	0.047064	0	6677	0.046959	0	6677	0.047793	0	6677	0.046223	0
6682	0.046714	0	6682	0.048146	0	6682	0.047606	0	6682	0.048133	0	6682	0.047129	0	6682	0.047023	0	6682	0.047858	0	6682	0.046286	0
6687	0.046777	0	6687	0.048211	0	6687	0.047671	0	6687	0.048198	0	6687	0.047193	0	6687	0.047087	0	6687	0.047923	0	6687	0.04635	0
6692	0.046841	0	6692	0.048277	0	6692	0.047736	0	6692	0.048263	0	6692	0.047258	0	6692	0.047152	0	6692	0.047988	0	6692	0.046413	0
6697	0.046904	0	6697	0.048343	0	6697	0.047801	0	6697	0.048328	0	6697	0.047322	0	6697	0.047216	0	6697	0.048054	0	6697	0.046476	0
6702	0.046968	0	6702	0.048409	0	6702	0.047866	0	6702	0.048393	0	6702	0.047387	0	6702	0.047281	0	6702	0.048119	0	6702	0.04654	0
6707	0.047031	0	6707	0.048475	0	6707	0.047932	0	6707	0.048458	0	6707	0.047452	0	6707	0.047345	0	6707	0.048185	0	6707	0.046603	0
6712	0.047095	0	6712	0.048541	0	6712	0.047997	0	6712	0.048523	0	6712	0.047516	0	6712	0.04741	0	6712	0.04825	0	6712	0.046667	0
6717	0.047159	0	6717	0.048607	0	6717	0.048062	0	6717	0.048588	0	6717	0.047581	0	6717	0.047475	0	6717	0.048316	0	6717	0.046731	0
6722	0.047222	0	6722	0.048673	0	6722	0.048128	0	6722	0.048653	0	6722	0.047646	0	6722	0.047539	0	6722	0.048381	0	6722	0.046794	0
6727	0.047286	0	6727	0.048739	0	6727	0.048193	0	6727	0.048718	0	6727	0.047711	0	6727	0.047604	0	6727	0.048447	0	6727	0.046858	0
6732	0.04735	0	6732	0.048805	0	6732	0.048259	0	6732	0.048783	0	6732	0.047776	0	6732	0.047669	0	6732	0.048512	0	6732	0.046922	0
6737	0.047414	0	6737	0.048871	0	6737	0.048324	0	6737	0.048848	0	6737	0.047841	0	6737	0.047734	0	6737	0.048578	0	6737	0.046985	0
6742	0.047478	0	6742	0.048938	0	6742	0.04839	0	6742	0.048914	0	6742	0.047906	0	6742	0.047798	0	6742	0.048644	0	6742	0.047049	0
6747	0.047542	0	6747	0.049004	0	6747	0.048456	0	6747	0.048979	0	6747	0.047971	0	6747	0.047863	0	6747	0.04871	0	6747	0.047113	0
6752	0.047606	0	6752	0.04907	0	6752	0.048521	0	6752	0.049044	0	6752	0.048036	0	6752	0.047928	0	6752	0.048775	0	6752	0.047177	0
6757	0.04767	0	6757	0.049137	0	6757	0.048587	0	6757	0.04911	0	6757	0.048101	0	6757	0.047993	0	6757	0.048841	0	6757	0.047241	0
6762	0.047734	0	6762	0.049203	0	6762	0.048653	0	6762	0.049175	0	6762	0.048166	0	6762	0.048058	0	6762	0.048907	0	6762	0.047305	0
6767	0.047798	0	6767	0.049269	0	6767	0.048719	0	6767	0.049241	0	6767	0.048231	0	6767	0.048123	0	6767	0.048973	0	6767	0.047369	0
6772	0.047862	0	6772	0.049336	0	6772	0.048785	0	6772	0.049306	0	6772	0.048296	0	6772	0.048188	0	6772	0.049039	0	6772	0.047433	0
6777	0.047926	0	6777	0.049403	0	6777	0.04885	0	6777	0.049372	0	6777	0.048362	0	6777	0.048254	0	6777	0.049105	0	6777	0.047497	0
6782	0.04799	0	6782	0.049469	0	6782	0.048916	0	6782	0.049437	0	6782	0.048427	0	6782	0.048319	0	6782	0.049171	0	6782	0.047561	0
6787	0.048055	0	6787	0.049536	0	6787	0.048982	0	6787	0.049503	0	6787	0.048492	0	6787	0.048384	0	6787	0.049238	0	6787	0.047626	0
6792	0.048119	0	6792	0.049602	0	6792	0.049048	0	6792	0.049569	0	6792	0.048558	0	6792	0.048449	0	6792	0.049304	0	6792	0.04769	0
6797	0.048183	0	6797	0.049669	0	6797	0.049115	0	6797	0.049635	0	6797	0.048623	0	6797	0.048515	0	6797	0.04937	0	6797	0.047754	0
6802	0.048248	0	6802	0.049736	0	6802	0.049181	0	6802	0.0497	0	6802	0.048689	0	6802	0.04858	0	6802	0.049436	0	6802	0.047818	0
6807	0.048312	0	6807	0.049803	0	6807	0.049247	0	6807	0.049766	0	6807	0.048754	0	6807	0.048646	0	6807	0.049503	0	6807	0.047883	0
6812	0.048377	0	6812	0.04987	0	6812	0.049313	0	6812	0.049832	0	6812	0.04882	0	6812	0.048711	0	6812	0.049569	0	6812	0.047947	0
6817	0.048441	0	6817	0.049937	0	6817	0.049379	0	6817	0.049898	0	6817	0.048885	0	6817	0.048777	0	6817	0.049635	0	6817	0.048012	0
6822	0.048506	0	6822	0.050004	0	6822	0.049446	0	6822	0.049964	0	6822	0.048951	0	6822	0.048842	0	6822	0.049702	0	6822	0.048076	0
6827	0.04857	0	6827	0.050071	0	6827	0.049512	0	6827	0.05003	0	6827	0.049017	0	6827	0.048908	0	6827	0.049768	0	6827	0.048141	0
6832	0.048635	0	6832	0.050138	0	6832	0.049579	0	6832	0.050096	0	6832	0.049082	0	6832	0.048973	0	6832	0.049835	0	6832	0.048205	0
6837	0.0487	0	6837	0.050205	0	6837	0.049645	0	6837	0.050162	0	6837	0.049148	0	6837	0.049039	0	6837	0.049901	0	6837	0.04827	0
6842	0.048765	0	6842	0.050272	0	6842	0.049711	0	6842	0.050228	0	6842	0.049214	0	6842	0.049105	0	6842	0.049968	0	6842	0.048335	0
6847	0.048829	0	6847	0.050339	0	6847	0.049778	0	6847	0.050294	0	6847	0.04928	0	6847	0.049171	0	6847	0.050035	0	6847	0.048399	0
6852	0.048894	0	6852	0.050406	0	6852	0.049845	0	6852	0.050361	0	6852	0.049346	0	6852	0.049236	0	6852	0.050101	0	6852	0.048464	0
6857	0.048959	0	6857	0.050474	0	6857	0.049911	0	6857	0.050427	0	6857	0.049412	0	6857	0.049302	0	6857	0.050168	0	6857	0.048529	0
6862	0.049024	0	6862	0.050541	0	6862	0.049978	0	6862	0.050493	0	6862	0.049478	0	6862	0.049368	0	6862	0.050235	0	6862	0.048594	0
6867	0.049089	0	6867	0.050608	0	6867	0.050045	0	6867	0.05056	0	6867	0.049544	0	6867	0.049434	0	6867	0.050302	0	6867	0.048659	0
6872	0.049154	0	6872	0.050676	0	6872	0.050111	0	6872	0.050626	0	6872	0.04961	0	6872	0.0495	0	6872	0.050369	0	6872	0.048724	0
6877	0.049219	0	6877	0.050743	0	6877	0.050178	0	6877	0.050693	0	6877	0.049676	0	6877	0.049566	0	6877	0.050436	0	6877	0.048789	0
6882	0.049284	0	6882	0.050811	0	6882	0.050245	0	6882	0.050759	0	6882	0.049742	0	6882	0.049632	0	6882	0.050503	0	6882	0.048854	0
6887	0.049349	0	6887	0.050878	0	6887	0.050312	0	6887	0.050826	0	6887	0.049809	0	6887	0.049698	0	6887	0.05057	0	6887	0.048919	0
6892	0.049414	0	6892	0.050946	0	6892	0.050379	0	6892	0.050892	0	6892	0.049875	0	6892	0.049765	0	6892	0.050637	0	6892	0.048984	0
6897	0.04948	0	6897	0.051013	0	6897	0.050446	0	6897	0.050959	0	6897	0.049941	0	6897	0.049831	0	6897	0.050704	0	6897	0.049049	0
6902	0.049545	0	6902	0.051081	0	6902	0.050513	0	6902	0.051025	0	6902	0.050008	0	6902	0.049897	0	6902	0.050771	0	6902	0.049114	0
6907	0.04961	0	6907	0.051149	0	6907	0.05058	0	6907	0.051092	0	6907	0.050074	0	6907	0.049963	0	6907	0.050838	0	6907	0.04918	0
6912	0.049676	0	6912	0.051217	0	6912	0.050647	0	6912	0.051159	0	6912	0.050141	0	6912	0.05003	0	6912	0.050906	0	6912	0.049245	0
6917	0.049741	0	6917	0.051284	0	6917	0.050714	0	6917	0.051226	0	6917	0.050207	0	6917	0.050096	0	6917	0.050973	0	6917	0.04931	0
6922	0.049806	0	6922	0.051352	0	6922	0.050781	0	6922	0.051293	0	6922	0.050274	0	6922	0.050163	0	6922	0.05104	0	6922	0.049376	0
6927	0.049872	0	6927	0.05142	0	6927	0.050849	0	6927	0.051359	0	6927	0.05034	0	6927	0.050229	0	6927	0.051108	0	6927	0.049441	0
6932	0.049938	0	6932	0.051488	0	6932	0.050916	0	6932	0.051426	0	6932	0.050407	0	6932	0.050296	0	6932	0.051175	0	6932	0.049506	0
6937	0.050003	0	6937	0.051556	0	6937	0.050983	0	6937	0.051493	0	6937	0.050474	0	6937	0.050362	0	6937	0.051243	0	6937	0.049572	0
6942	0.050069	0	6942	0.051624	0	6942	0.051051	0	6942	0.05156	0	6942	0.05054	0	6942	0.050429	0	6942	0.05131	0	6942	0.049638	0
6947	0.050134	0	6947	0.051692	0	6947	0.051118	0	6947	0.051627	0	6947	0.050607	0	6947	0.050496	0	6947	0.051378	0	6947	0.049703	0
6952	0.0502	0	6952	0.05176	0	6952	0.051186	0	6952	0.051694	0	6952	0.050674	0	6952	0.050562	0	6952	0.051445	0	6952	0.049769	0
6957	0.050266	0	6957	0.051829	0	6957	0.051253	0	6957	0.051762	0	6957	0.050741	0	6957	0.050629	0	6957	0.051513	0	6957	0.049834	0
6962	0.050332	0	6962	0.051897	0	6962	0.051321	0	6962	0.051829	0	6962	0.050808	0	6962	0.050696	0	6962	0.051581	0	6962	0.0499	0
6967	0.050397	0	6967	0.051965	0	6967	0.051388	0	6967	0.051896	0	6967	0.050875	0	6967	0.050763	0	6967	0.051648	0	6967	0.049966	0
6972	0.050463	0	6972	0.052033	0	6972	0.051456	0	6972	0.051963	0	6972	0.050942	0	6972	0.05083	0	6972	0.051716	0	6972	0.050032	0
6977	0.050529	0	6977	0.052102	0	6977	0.051524	0	6977	0.052031	0	6977	0.051009	0	6977	0.050896	0	6977	0.051784	0	6977	0.050098	0
6982	0.050595	0	6982	0.05217	0	6982	0.051591	0	6982	0.052098	0	6982	0.051076	0	6982	0.050963	0	6982	0.051852	0	6982	0.050164	0
6987	0.050661	0	6987	0.052239	0	6987	0.051659	0	6987	0.052165	0	6987	0.051143	0	6987	0.05103	0	6987	0.05192	0	6987	0.050229	0
6992	0.050727	0	6992	0.052307	0	6992	0.051727	0	6992	0.052233	0	6992	0.05121	0	6992	0.051097	0	6992	0.051988	0	6992	0.050295	0
6997	0.050793	0	6997	0.052376	0	6997	0.051795	0	6997	0.0523	0	6997	0.051277	0	6997	0.051165	0	6997	0.052056	0	6997	0.050361	0
7002	0.050859	0	7002	0.052444	0	7002	0.051863	0	7002	0.052368	0	7002	0.051344	0	7002	0.051232	0	7002	0.052124	0	7002	0.050428	0
7007	0.050926	0	7007	0.052513	0	7007	0.051931	0	7007	0.052435	0	7007	0.051412	0	7007	0.051299	0	7007	0.052192	0	7007	0.050494	0
7012	0.050992	0	7012	0.052582	0	7012	0.051999	0	7012	0.052503	0	7012	0.051479	0	7012	0.051366	0	7012	0.05226	0	7012	0.05056	0
7017	0.051058	0	7017	0.05265	0	7017	0.052067	0	7017	0.052571	0	7017	0.051546	0	7017	0.051433	0	7017	0.052328	0	7017	0.050626	0
7022	0.051124	0	7022	0.052719	0	7022	0.052135	0	7022	0.052638	0	7022	0.051614	0	7022	0.051501	0	7022	0.052397	0	7022	0.050692	0
7027	0.051191	0	7027	0.052788	0	7027	0.052203	0	7027	0.052706	0	7027	0.051681	0	7027	0.051568	0	7027	0.052465	0	7027	0.050759	0
7032	0.051257	0	7032	0.052857	0	7032	0.052271	0	7032	0.052774	0	7032	0.051749	0	7032	0.051636	0	7032	0.052533	0	7032	0.050825	0
7037	0.051324	0	7037	0.052926	0	7037	0.05234	0	7037	0.052842	0	7037	0.051816	0	7037	0.051703	0	7037	0.052602	0	7037	0.050891	0
7042	0.05139	0	7042	0.052995	0	7042	0.052408	0	7042	0.05291	0	7042	0.051884	0	7042	0.051771	0	7042	0.05267	0	7042	0.050958	0
7047	0.051457	0	7047	0.053064	0	7047	0.052476	0	7047	0.052978	0	7047	0.051952	0	7047	0.051838	0	7047	0.052738	0	7047	0.051024	0
7052	0.051523	0	7052	0.053133	0	7052	0.052545	0	7052	0.053046	0	7052	0.052019	0	7052	0.051906	0	7052	0.052807	0	7052	0.051091	0
7057	0.05159	0	7057	0.053202	0	7057	0.052613	0	7057	0.053114	0	7057	0.052087	0	7057	0.051973	0	7057	0.052875	0	7057	0.051157	0
7062	0.051656	0	7062	0.053271	0	7062	0.052681	0	7062	0.053182	0	7062	0.052155	0	7062	0.052041	0	7062	0.052944	0	7062	0.051224	0
7067	0.051723	0	7067	0.05334	0	7067	0.05275	0	7067	0.05325	0	7067	0.052223	0	7067	0.052109	0	7067	0.053013	0	7067	0.05129	0
7072	0.05179	0	7072	0.053409	0	7072	0.052818	0	7072	0.053318	0	7072	0.052291	0	7072	0.052176	0	7072	0.053081	0	7072	0.051357	0
7077	0.051857	0	7077	0.053478	0	7077	0.052887	0	7077	0.053386	0	7077	0.052359	0	7077	0.052244	0	7077	0.05315	0	7077	0.051424	0
7082	0.051923	0	7082	0.053548	0	7082	0.052956	0	7082	0.053454	0	7082	0.052426	0	7082	0.052312	0	7082	0.053219	0	7082	0.051491	0
7087	0.05199	0	7087	0.053617	0	7087	0.053024	0	7087	0.053523	0	7087	0.052494	0	7087	0.05238	0	7087	0.053288	0	7087	0.051557	0
7092	0.052057	0	7092	0.053686	0	7092	0.053093	0	7092	0.053591	0	7092	0.052563	0	7092	0.052448	0	7092	0.053357	0	7092	0.051624	0
7097	0.052124	0	7097	0.053756	0	7097	0.053162	0	7097	0.053659	0	7097	0.052631	0	7097	0.052516	0	7097	0.053425	0	7097	0.051691	0
7102	0.052191	0	7102	0.053825	0	7102	0.053231	0	7102	0.053728	0	7102	0.052699	0	7102	0.052584	0	7102	0.053494	0	7102	0.051758	0
7107	0.052258	0	7107	0.053895	0	7107	0.0533	0	7107	0.053796	0	7107	0.052767	0	7107	0.052652	0	7107	0.053563	0	7107	0.051825	0
7112	0.052325	0	7112	0.053964	0	7112	0.053368	0	7112	0.053865	0	7112	0.052835	0	7112	0.05272	0	7112	0.053632	0	7112	0.051892	0
7117	0.052392	0	7117	0.054034	0	7117	0.053437	0	7117	0.053933	0	7117	0.052903	0	7117	0.052788	0	7117	0.053701	0	7117	0.051959	0
7122	0.052459	0	7122	0.054104	0	7122	0.053506	0	7122	0.054002	0	7122	0.052972	0	7122	0.052857	0	7122	0.053771	0	7122	0.052026	0
7127	0.052527	0	7127	0.054173	0	7127	0.053575	0	7127	0.05407	0	7127	0.05304	0	7127	0.052925	0	7127	0.05384	0	7127	0.052093	0
7132	0.052594	0	7132	0.054243	0	7132	0.053644	0	7132	0.054139	0	7132	0.053109	0	7132	0.052993	0	7132	0.053909	0	7132	0.052161	0
7137	0.052661	0	7137	0.054313	0	7137	0.053714	0	7137	0.054208	0	7137	0.053177	0	7137	0.053061	0	7137	0.053978	0	7137	0.052228	0
7142	0.052729	0	7142	0.054383	0	7142	0.053783	0	7142	0.054277	0	7142	0.053245	0	7142	0.05313	0	7142	0.054048	0	7142	0.052295	0
7147	0.052796	0	7147	0.054453	0	7147	0.053852	0	7147	0.054345	0	7147	0.053314	0	7147	0.053198	0	7147	0.054117	0	7147	0.052362	0
7152	0.052863	0	7152	0.054523	0	7152	0.053921	0	7152	0.054414	0	7152	0.053383	0	7152	0.053267	0	7152	0.054186	0	7152	0.05243	0
7157	0.052931	0	7157	0.054593	0	7157	0.053991	0	7157	0.054483	0	7157	0.053451	0	7157	0.053335	0	7157	0.054256	0	7157	0.052497	0
7162	0.052998	0	7162	0.054663	0	7162	0.05406	0	7162	0.054552	0	7162	0.05352	0	7162	0.053404	0	7162	0.054325	0	7162	0.052565	0
7167	0.053066	0	7167	0.054733	0	7167	0.054129	0	7167	0.054621	0	7167	0.053589	0	7167	0.053472	0	7167	0.054395	0	7167	0.052632	0
7172	0.053133	0	7172	0.054803	0	7172	0.054199	0	7172	0.05469	0	7172	0.053657	0	7172	0.053541	0	7172	0.054464	0	7172	0.0527	0
7177	0.053201	0	7177	0.054873	0	7177	0.054268	0	7177	0.054759	0	7177	0.053726	0	7177	0.05361	0	7177	0.054534	0	7177	0.052767	0
7182	0.053269	0	7182	0.054943	0	7182	0.054338	0	7182	0.054828	0	7182	0.053795	0	7182	0.053678	0	7182	0.054604	0	7182	0.052835	0
7187	0.053336	0	7187	0.055013	0	7187	0.054407	0	7187	0.054897	0	7187	0.053864	0	7187	0.053747	0	7187	0.054673	0	7187	0.052903	0
7192	0.053404	0	7192	0.055084	0	7192	0.054477	0	7192	0.054967	0	7192	0.053933	0	7192	0.053816	0	7192	0.054743	0	7192	0.05297	0
7197	0.053472	0	7197	0.055154	0	7197	0.054547	0	7197	0.055036	0	7197	0.054002	0	7197	0.053885	0	7197	0.054813	0	7197	0.053038	0
7202	0.05354	0	7202	0.055224	0	7202	0.054616	0	7202	0.055105	0	7202	0.054071	0	7202	0.053954	0	7202	0.054883	0	7202	0.053106	0
7207	0.053608	0	7207	0.055295	0	7207	0.054686	0	7207	0.055174	0	7207	0.05414	0	7207	0.054023	0	7207	0.054953	0	7207	0.053174	0
7212	0.053676	0	7212	0.055365	0	7212	0.054756	0	7212	0.055244	0	7212	0.054209	0	7212	0.054092	0	7212	0.055022	0	7212	0.053242	0
7217	0.053744	0	7217	0.055436	0	7217	0.054826	0	7217	0.055313	0	7217	0.054278	0	7217	0.054161	0	7217	0.055092	0	7217	0.05331	0
7222	0.053812	0	7222	0.055506	0	7222	0.054896	0	7222	0.055383	0	7222	0.054347	0	7222	0.05423	0	7222	0.055162	0	7222	0.053378	0
7227	0.05388	0	7227	0.055577	0	7227	0.054965	0	7227	0.055452	0	7227	0.054417	0	7227	0.054299	0	7227	0.055233	0	7227	0.053446	0
7232	0.053948	0	7232	0.055647	0	7232	0.055035	0	7232	0.055522	0	7232	0.054486	0	7232	0.054368	0	7232	0.055303	0	7232	0.053514	0
7237	0.054016	0	7237	0.055718	0	7237	0.055105	0	7237	0.055591	0	7237	0.054555	0	7237	0.054437	0	7237	0.055373	0	7237	0.053582	0
7242	0.054084	0	7242	0.055789	0	7242	0.055175	0	7242	0.055661	0	7242	0.054624	0	7242	0.054507	0	7242	0.055443	0	7242	0.05365	0
7247	0.054152	0	7247	0.05586	0	7247	0.055246	0	7247	0.055731	0	7247	0.054694	0	7247	0.054576	0	7247	0.055513	0	7247	0.053718	0
7252	0.054221	0	7252	0.055931	0	7252	0.055316	0	7252	0.0558	0	7252	0.054763	0	7252	0.054645	0	7252	0.055583	0	7252	0.053786	0
7257	0.054289	0	7257	0.056001	0	7257	0.055386	0	7257	0.05587	0	7257	0.054833	0	7257	0.054715	0	7257	0.055654	0	7257	0.053855	0
7262	0.054357	0	7262	0.056072	0	7262	0.055456	0	7262	0.05594	0	7262	0.054902	0	7262	0.054784	0	7262	0.055724	0	7262	0.053923	0
7267	0.054426	0	7267	0.056143	0	7267	0.055526	0	7267	0.05601	0	7267	0.054972	0	7267	0.054854	0	7267	0.055795	0	7267	0.053991	0
7272	0.054494	0	7272	0.056214	0	7272	0.055597	0	7272	0.05608	0	7272	0.055042	0	7272	0.054923	0	7272	0.055865	0	7272	0.05406	0
7277	0.054563	0	7277	0.056285	0	7277	0.055667	0	7277	0.05615	0	7277	0.055111	0	7277	0.054993	0	7277	0.055936	0	7277	0.054128	0
7282	0.054631	0	7282	0.056356	0	7282	0.055738	0	7282	0.056219	0	7282	0.055181	0	7282	0.055062	0	7282	0.056006	0	7282	0.054197	0
7287	0.0547	0	7287	0.056428	0	7287	0.055808	0	7287	0.05629	0	7287	0.055251	0	7287	0.055132	0	7287	0.056077	0	7287	0.054265	0
7292	0.054769	0	7292	0.056499	0	7292	0.055879	0	7292	0.05636	0	7292	0.055321	0	7292	0.055202	0	7292	0.056147	0	7292	0.054334	0
7297	0.054837	0	7297	0.05657	0	7297	0.055949	0	7297	0.05643	0	7297	0.05539	0	7297	0.055271	0	7297	0.056218	0	7297	0.054402	0
7302	0.054906	0	7302	0.056641	0	7302	0.05602	0	7302	0.0565	0	7302	0.05546	0	7302	0.055341	0	7302	0.056289	0	7302	0.054471	0
7307	0.054975	0	7307	0.056713	0	7307	0.05609	0	7307	0.05657	0	7307	0.05553	0	7307	0.055411	0	7307	0.05636	0	7307	0.05454	0
7312	0.055043	0	7312	0.056784	0	7312	0.056161	0	7312	0.05664	0	7312	0.0556	0	7312	0.055481	0	7312	0.05643	0	7312	0.054609	0
7317	0.055112	0	7317	0.056855	0	7317	0.056232	0	7317	0.056711	0	7317	0.05567	0	7317	0.055551	0	7317	0.056501	0	7317	0.054677	0
7322	0.055181	0	7322	0.056927	0	7322	0.056302	0	7322	0.056781	0	7322	0.05574	0	7322	0.055621	0	7322	0.056572	0	7322	0.054746	0
7327	0.05525	0	7327	0.056998	0	7327	0.056373	0	7327	0.056851	0	7327	0.055811	0	7327	0.055691	0	7327	0.056643	0	7327	0.054815	0
7332	0.055319	0	7332	0.05707	0	7332	0.056444	0	7332	0.056922	0	7332	0.055881	0	7332	0.055761	0	7332	0.056714	0	7332	0.054884	0
7337	0.055388	0	7337	0.057141	0	7337	0.056515	0	7337	0.056992	0	7337	0.055951	0	7337	0.055831	0	7337	0.056785	0	7337	0.054953	0
7342	0.055457	0	7342	0.057213	0	7342	0.056586	0	7342	0.057063	0	7342	0.056021	0	7342	0.055901	0	7342	0.056856	0	7342	0.055022	0
7347	0.055526	0	7347	0.057285	0	7347	0.056657	0	7347	0.057133	0	7347	0.056091	0	7347	0.055971	0	7347	0.056927	0	7347	0.055091	0
7352	0.055595	0	7352	0.057356	0	7352	0.056728	0	7352	0.057204	0	7352	0.056162	0	7352	0.056042	0	7352	0.056998	0	7352	0.05516	0
7357	0.055665	0	7357	0.057428	0	7357	0.056799	0	7357	0.057274	0	7357	0.056232	0	7357	0.056112	0	7357	0.05707	0	7357	0.055229	0
7362	0.055734	0	7362	0.0575	0	7362	0.05687	0	7362	0.057345	0	7362	0.056303	0	7362	0.056182	0	7362	0.057141	0	7362	0.055299	0
7367	0.055803	0	7367	0.057572	0	7367	0.056941	0	7367	0.057416	0	7367	0.056373	0	7367	0.056253	0	7367	0.057212	0	7367	0.055368	0
7372	0.055872	0	7372	0.057644	0	7372	0.057013	0	7372	0.057487	0	7372	0.056444	0	7372	0.056323	0	7372	0.057284	0	7372	0.055437	0
7377	0.055942	0	7377	0.057716	0	7377	0.057084	0	7377	0.057557	0	7377	0.056514	0	7377	0.056393	0	7377	0.057355	0	7377	0.055506	0
7382	0.056011	0	7382	0.057788	0	7382	0.057155	0	7382	0.057628	0	7382	0.056585	0	7382	0.056464	0	7382	0.057426	0	7382	0.055576	0
7387	0.056081	0	7387	0.05786	0	7387	0.057227	0	7387	0.057699	0	7387	0.056655	0	7387	0.056534	0	7387	0.057498	0	7387	0.055645	0
7392	0.05615	0	7392	0.057932	0	7392	0.057298	0	7392	0.05777	0	7392	0.056726	0	7392	0.056605	0	7392	0.057569	0	7392	0.055715	0
7397	0.05622	0	7397	0.058004	0	7397	0.057369	0	7397	0.057841	0	7397	0.056797	0	7397	0.056676	0	7397	0.057641	0	7397	0.055784	0
7402	0.056289	0	7402	0.058076	0	7402	0.057441	0	7402	0.057912	0	7402	0.056868	0	7402	0.056746	0	7402	0.057713	0	7402	0.055854	0
7407	0.056359	0	7407	0.058148	0	7407	0.057512	0	7407	0.057983	0	7407	0.056938	0	7407	0.056817	0	7407	0.057784	0	7407	0.055923	0
7412	0.056428	0	7412	0.058221	0	7412	0.057584	0	7412	0.058054	0	7412	0.057009	0	7412	0.056888	0	7412	0.057856	0	7412	0.055993	0
7417	0.056498	0	7417	0.058293	0	7417	0.057656	0	7417	0.058125	0	7417	0.05708	0	7417	0.056959	0	7417	0.057928	0	7417	0.056063	0
7422	0.056568	0	7422	0.058365	0	7422	0.057727	0	7422	0.058197	0	7422	0.057151	0	7422	0.057029	0	7422	0.057999	0	7422	0.056132	0
7427	0.056638	0	7427	0.058438	0	7427	0.057799	0	7427	0.058268	0	7427	0.057222	0	7427	0.0571	0	7427	0.058071	0	7427	0.056202	0
7432	0.056708	0	7432	0.05851	0	7432	0.057871	0	7432	0.058339	0	7432	0.057293	0	7432	0.057171	0	7432	0.058143	0	7432	0.056272	0
7437	0.056777	0	7437	0.058583	0	7437	0.057942	0	7437	0.05841	0	7437	0.057364	0	7437	0.057242	0	7437	0.058215	0	7437	0.056342	0
7442	0.056847	0	7442	0.058655	0	7442	0.058014	0	7442	0.058482	0	7442	0.057435	0	7442	0.057313	0	7442	0.058287	0	7442	0.056412	0
7447	0.056917	0	7447	0.058728	0	7447	0.058086	0	7447	0.058553	0	7447	0.057507	0	7447	0.057384	0	7447	0.058359	0	7447	0.056481	0
7452	0.056987	0	7452	0.0588	0	7452	0.058158	0	7452	0.058625	0	7452	0.057578	0	7452	0.057455	0	7452	0.058431	0	7452	0.056551	0
7457	0.057057	0	7457	0.058873	0	7457	0.05823	0	7457	0.058696	0	7457	0.057649	0	7457	0.057527	0	7457	0.058503	0	7457	0.056621	0
7462	0.057127	0	7462	0.058946	0	7462	0.058302	0	7462	0.058768	0	7462	0.05772	0	7462	0.057598	0	7462	0.058575	0	7462	0.056691	0
7467	0.057198	0	7467	0.059018	0	7467	0.058374	0	7467	0.058839	0	7467	0.057792	0	7467	0.057669	0	7467	0.058648	0	7467	0.056762	0
7472	0.057268	0	7472	0.059091	0	7472	0.058446	0	7472	0.058911	0	7472	0.057863	0	7472	0.05774	0	7472	0.05872	0	7472	0.056832	0
7477	0.057338	0	7477	0.059164	0	7477	0.058518	0	7477	0.058983	0	7477	0.057935	0	7477	0.057812	0	7477	0.058792	0	7477	0.056902	0
7482	0.057408	0	7482	0.059237	0	7482	0.058591	0	7482	0.059054	0	7482	0.058006	0	7482	0.057883	0	7482	0.058864	0	7482	0.056972	0
7487	0.057478	0	7487	0.05931	0	7487	0.058663	0	7487	0.059126	0	7487	0.058078	0	7487	0.057954	0	7487	0.058937	0	7487	0.057042	0
7492	0.057549	0	7492	0.059383	0	7492	0.058735	0	7492	0.059198	0	7492	0.058149	0	7492	0.058026	0	7492	0.059009	0	7492	0.057113	0
7497	0.057619	0	7497	0.059456	0	7497	0.058807	0	7497	0.05927	0	7497	0.058221	0	7497	0.058097	0	7497	0.059082	0	7497	0.057183	0
7502	0.05769	0	7502	0.059529	0	7502	0.05888	0	7502	0.059342	0	7502	0.058293	0	7502	0.058169	0	7502	0.059154	0	7502	0.057253	0
7507	0.05776	0	7507	0.059602	0	7507	0.058952	0	7507	0.059414	0	7507	0.058364	0	7507	0.058241	0	7507	0.059227	0	7507	0.057324	0
7512	0.057831	0	7512	0.059675	0	7512	0.059025	0	7512	0.059486	0	7512	0.058436	0	7512	0.058312	0	7512	0.059299	0	7512	0.057394	0
7517	0.057901	0	7517	0.059748	0	7517	0.059097	0	7517	0.059558	0	7517	0.058508	0	7517	0.058384	0	7517	0.059372	0	7517	0.057465	0
7522	0.057972	0	7522	0.059822	0	7522	0.05917	0	7522	0.05963	0	7522	0.05858	0	7522	0.058456	0	7522	0.059445	0	7522	0.057536	0
7527	0.058042	0	7527	0.059895	0	7527	0.059242	0	7527	0.059702	0	7527	0.058652	0	7527	0.058527	0	7527	0.059517	0	7527	0.057606	0
7532	0.058113	0	7532	0.059968	0	7532	0.059315	0	7532	0.059774	0	7532	0.058723	0	7532	0.058599	0	7532	0.05959	0	7532	0.057677	0
7537	0.058184	0	7537	0.060042	0	7537	0.059388	0	7537	0.059846	0	7537	0.058795	0	7537	0.058671	0	7537	0.059663	0	7537	0.057748	0
7542	0.058255	0	7542	0.060115	0	7542	0.05946	0	7542	0.059918	0	7542	0.058867	0	7542	0.058743	0	7542	0.059736	0	7542	0.057818	0
7547	0.058325	0	7547	0.060189	0	7547	0.059533	0	7547	0.059991	0	7547	0.058939	0	7547	0.058815	0	7547	0.059809	0	7547	0.057889	0
7552	0.058396	0	7552	0.060262	0	7552	0.059606	0	7552	0.060063	0	7552	0.059012	0	7552	0.058887	0	7552	0.059882	0	7552	0.05796	0
7557	0.058467	0	7557	0.060336	0	7557	0.059679	0	7557	0.060135	0	7557	0.059084	0	7557	0.058959	0	7557	0.059955	0	7557	0.058031	0
7562	0.058538	0	7562	0.060409	0	7562	0.059752	0	7562	0.060208	0	7562	0.059156	0	7562	0.059031	0	7562	0.060028	0	7562	0.058102	0
7567	0.058609	0	7567	0.060483	0	7567	0.059825	0	7567	0.06028	0	7567	0.059228	0	7567	0.059103	0	7567	0.060101	0	7567	0.058173	0
7572	0.05868	0	7572	0.060557	0	7572	0.059898	0	7572	0.060353	0	7572	0.0593	0	7572	0.059175	0	7572	0.060174	0	7572	0.058244	0
7577	0.058751	0	7577	0.06063	0	7577	0.059971	0	7577	0.060425	0	7577	0.059373	0	7577	0.059248	0	7577	0.060247	0	7577	0.058315	0
7582	0.058822	0	7582	0.060704	0	7582	0.060044	0	7582	0.060498	0	7582	0.059445	0	7582	0.05932	0	7582	0.06032	0	7582	0.058386	0
7587	0.058894	0	7587	0.060778	0	7587	0.060117	0	7587	0.06057	0	7587	0.059518	0	7587	0.059392	0	7587	0.060394	0	7587	0.058457	0
7592	0.058965	0	7592	0.060852	0	7592	0.06019	0	7592	0.060643	0	7592	0.05959	0	7592	0.059464	0	7592	0.060467	0	7592	0.058528	0
7597	0.059036	0	7597	0.060926	0	7597	0.060263	0	7597	0.060716	0	7597	0.059663	0	7597	0.059537	0	7597	0.06054	0	7597	0.058599	0
7602	0.059107	0	7602	0.061	0	7602	0.060337	0	7602	0.060789	0	7602	0.059735	0	7602	0.059609	0	7602	0.060614	0	7602	0.058671	0
7607	0.059179	0	7607	0.061074	0	7607	0.06041	0	7607	0.060861	0	7607	0.059808	0	7607	0.059682	0	7607	0.060687	0	7607	0.058742	0
7612	0.05925	0	7612	0.061148	0	7612	0.060483	0	7612	0.060934	0	7612	0.05988	0	7612	0.059754	0	7612	0.060761	0	7612	0.058813	0
7617	0.059321	0	7617	0.061222	0	7617	0.060557	0	7617	0.061007	0	7617	0.059953	0	7617	0.059827	0	7617	0.060834	0	7617	0.058885	0
7622	0.059393	0	7622	0.061296	0	7622	0.06063	0	7622	0.06108	0	7622	0.060026	0	7622	0.059899	0	7622	0.060908	0	7622	0.058956	0
7627	0.059464	0	7627	0.06137	0	7627	0.060704	0	7627	0.061153	0	7627	0.060098	0	7627	0.059972	0	7627	0.060981	0	7627	0.059028	0
7632	0.059536	0	7632	0.061444	0	7632	0.060777	0	7632	0.061226	0	7632	0.060171	0	7632	0.060045	0	7632	0.061055	0	7632	0.059099	0
7637	0.059608	0	7637	0.061519	0	7637	0.060851	0	7637	0.061299	0	7637	0.060244	0	7637	0.060117	0	7637	0.061129	0	7637	0.059171	0
7642	0.059679	0	7642	0.061593	0	7642	0.060924	0	7642	0.061372	0	7642	0.060317	0	7642	0.06019	0	7642	0.061202	0	7642	0.059242	0
7647	0.059751	0	7647	0.061667	0	7647	0.060998	0	7647	0.061446	0	7647	0.06039	0	7647	0.060263	0	7647	0.061276	0	7647	0.059314	0
7652	0.059823	0	7652	0.061742	0	7652	0.061072	0	7652	0.061519	0	7652	0.060463	0	7652	0.060336	0	7652	0.06135	0	7652	0.059386	0
7657	0.059894	0	7657	0.061816	0	7657	0.061145	0	7657	0.061592	0	7657	0.060536	0	7657	0.060409	0	7657	0.061424	0	7657	0.059457	0
7662	0.059966	0	7662	0.061891	0	7662	0.061219	0	7662	0.061665	0	7662	0.060609	0	7662	0.060482	0	7662	0.061498	0	7662	0.059529	0
7667	0.060038	0	7667	0.061965	0	7667	0.061293	0	7667	0.061739	0	7667	0.060682	0	7667	0.060555	0	7667	0.061572	0	7667	0.059601	0
7672	0.06011	0	7672	0.06204	0	7672	0.061367	0	7672	0.061812	0	7672	0.060755	0	7672	0.060628	0	7672	0.061646	0	7672	0.059673	0
7677	0.060182	0	7677	0.062115	0	7677	0.061441	0	7677	0.061885	0	7677	0.060829	0	7677	0.060701	0	7677	0.06172	0	7677	0.059745	0
7682	0.060254	0	7682	0.062189	0	7682	0.061515	0	7682	0.061959	0	7682	0.060902	0	7682	0.060774	0	7682	0.061794	0	7682	0.059817	0
7687	0.060326	0	7687	0.062264	0	7687	0.061589	0	7687	0.062032	0	7687	0.060975	0	7687	0.060847	0	7687	0.061868	0	7687	0.059889	0
7692	0.060398	0	7692	0.062339	0	7692	0.061663	0	7692	0.062106	0	7692	0.061048	0	7692	0.060921	0	7692	0.061942	0	7692	0.059961	0
7697	0.06047	0	7697	0.062414	0	7697	0.061737	0	7697	0.062179	0	7697	0.061122	0	7697	0.060994	1	7697	0.062017	0	7697	0.060033	0
7702	0.060542	0	7702	0.062488	0	7702	0.061811	0	7702	0.062253	0	7702	0.061195	0	7702	0.061067	0	7702	0.062091	0	7702	0.060105	0
7707	0.060614	0	7707	0.062563	0	7707	0.061885	0	7707	0.062327	0	7707	0.061269	0	7707	0.06114	0	7707	0.062165	0	7707	0.060177	0
7712	0.060687	0	7712	0.062638	0	7712	0.06196	0	7712	0.062401	0	7712	0.061342	0	7712	0.061214	0	7712	0.06224	0	7712	0.06025	0
7717	0.060759	0	7717	0.062713	0	7717	0.062034	0	7717	0.062474	0	7717	0.061416	0	7717	0.061287	0	7717	0.062314	0	7717	0.060322	0
7722	0.060831	0	7722	0.062788	0	7722	0.062108	0	7722	0.062548	0	7722	0.061489	0	7722	0.061361	0	7722	0.062388	0	7722	0.060394	0
7727	0.060904	0	7727	0.062863	0	7727	0.062183	0	7727	0.062622	0	7727	0.061563	0	7727	0.061434	0	7727	0.062463	0	7727	0.060466	0
7732	0.060976	0	7732	0.062939	0	7732	0.062257	0	7732	0.062696	0	7732	0.061637	0	7732	0.061508	0	7732	0.062537	0	7732	0.060539	0
7737	0.061048	0	7737	0.063014	0	7737	0.062332	0	7737	0.06277	0	7737	0.06171	0	7737	0.061582	0	7737	0.062612	0	7737	0.060611	0
7742	0.061121	0	7742	0.063089	0	7742	0.062406	0	7742	0.062844	0	7742	0.061784	0	7742	0.061655	0	7742	0.062687	0	7742	0.060684	0
7747	0.061193	0	7747	0.063164	0	7747	0.062481	0	7747	0.062918	0	7747	0.061858	0	7747	0.061729	0	7747	0.062761	0	7747	0.060756	0
7752	0.061266	0	7752	0.06324	0	7752	0.062555	0	7752	0.062992	0	7752	0.061932	0	7752	0.061803	0	7752	0.062836	0	7752	0.060829	0
7757	0.061339	0	7757	0.063315	0	7757	0.06263	0	7757	0.063066	0	7757	0.062006	0	7757	0.061876	0	7757	0.062911	0	7757	0.060901	0
7762	0.061411	0	7762	0.06339	0	7762	0.062705	0	7762	0.06314	0	7762	0.06208	0	7762	0.06195	0	7762	0.062986	0	7762	0.060974	0
7767	0.061484	0	7767	0.063466	0	7767	0.062779	0	7767	0.063214	0	7767	0.062154	0	7767	0.062024	0	7767	0.063061	0	7767	0.061047	0
7772	0.061557	0	7772	0.063541	0	7772	0.062854	0	7772	0.063289	0	7772	0.062228	0	7772	0.062098	0	7772	0.063135	0	7772	0.06112	0
7777	0.06163	0	7777	0.063617	0	7777	0.062929	0	7777	0.063363	0	7777	0.062302	0	7777	0.062172	0	7777	0.06321	0	7777	0.061192	0
7782	0.061702	0	7782	0.063692	0	7782	0.063004	0	7782	0.063437	0	7782	0.062376	0	7782	0.062246	0	7782	0.063285	0	7782	0.061265	0
7787	0.061775	0	7787	0.063768	0	7787	0.063079	0	7787	0.063512	0	7787	0.06245	0	7787	0.06232	0	7787	0.06336	0	7787	0.061338	0
7792	0.061848	0	7792	0.063844	0	7792	0.063154	0	7792	0.063586	0	7792	0.062524	0	7792	0.062394	0	7792	0.063436	0	7792	0.061411	0
7797	0.061921	0	7797	0.063919	0	7797	0.063229	0	7797	0.063661	0	7797	0.062599	0	7797	0.062468	0	7797	0.063511	0	7797	0.061484	0
7802	0.061994	0	7802	0.063995	0	7802	0.063304	0	7802	0.063735	0	7802	0.062673	0	7802	0.062543	0	7802	0.063586	0	7802	0.061557	0
7807	0.062067	0	7807	0.064071	0	7807	0.063379	0	7807	0.06381	0	7807	0.062747	0	7807	0.062617	0	7807	0.063661	0	7807	0.06163	0
7812	0.06214	0	7812	0.064147	0	7812	0.063454	0	7812	0.063884	0	7812	0.062822	0	7812	0.062691	0	7812	0.063736	0	7812	0.061703	0
7817	0.062214	0	7817	0.064223	0	7817	0.063529	0	7817	0.063959	0	7817	0.062896	0	7817	0.062765	0	7817	0.063812	0	7817	0.061776	0
7822	0.062287	0	7822	0.064299	0	7822	0.063604	0	7822	0.064034	0	7822	0.062971	0	7822	0.06284	0	7822	0.063887	0	7822	0.061849	0
7827	0.06236	0	7827	0.064375	0	7827	0.06368	0	7827	0.064108	0	7827	0.063045	0	7827	0.062914	0	7827	0.063962	0	7827	0.061923	0
7832	0.062433	0	7832	0.064451	0	7832	0.063755	0	7832	0.064183	0	7832	0.06312	0	7832	0.062989	0	7832	0.064038	0	7832	0.061996	0
7837	0.062507	0	7837	0.064527	0	7837	0.06383	0	7837	0.064258	0	7837	0.063194	0	7837	0.063063	0	7837	0.064113	0	7837	0.062069	0
7842	0.06258	0	7842	0.064603	0	7842	0.063906	0	7842	0.064333	0	7842	0.063269	0	7842	0.063138	0	7842	0.064189	0	7842	0.062143	0
7847	0.062653	0	7847	0.064679	0	7847	0.063981	0	7847	0.064408	0	7847	0.063344	0	7847	0.063212	0	7847	0.064264	0	7847	0.062216	0
7852	0.062727	0	7852	0.064755	0	7852	0.064056	0	7852	0.064483	0	7852	0.063419	0	7852	0.063287	0	7852	0.06434	0	7852	0.062289	0
7857	0.0628	0	7857	0.064831	0	7857	0.064132	0	7857	0.064558	0	7857	0.063493	0	7857	0.063362	0	7857	0.064416	0	7857	0.062363	0
7862	0.062874	0	7862	0.064908	0	7862	0.064208	0	7862	0.064633	0	7862	0.063568	0	7862	0.063436	0	7862	0.064491	0	7862	0.062436	0
7867	0.062947	0	7867	0.064984	0	7867	0.064283	0	7867	0.064708	0	7867	0.063643	0	7867	0.063511	0	7867	0.064567	0	7867	0.06251	0
7872	0.063021	0	7872	0.065061	0	7872	0.064359	0	7872	0.064783	0	7872	0.063718	0	7872	0.063586	0	7872	0.064643	0	7872	0.062584	0
7877	0.063095	0	7877	0.065137	0	7877	0.064435	0	7877	0.064858	0	7877	0.063793	0	7877	0.063661	0	7877	0.064719	0	7877	0.062657	0
7882	0.063168	0	7882	0.065213	0	7882	0.06451	0	7882	0.064933	0	7882	0.063868	0	7882	0.063736	0	7882	0.064795	0	7882	0.062731	0
7887	0.063242	0	7887	0.06529	0	7887	0.064586	0	7887	0.065008	0	7887	0.063943	0	7887	0.063811	0	7887	0.064871	0	7887	0.062805	0
7892	0.063316	0	7892	0.065367	0	7892	0.064662	0	7892	0.065084	0	7892	0.064018	0	7892	0.063886	0	7892	0.064947	0	7892	0.062878	0
7897	0.06339	0	7897	0.065443	0	7897	0.064738	0	7897	0.065159	0	7897	0.064093	0	7897	0.063961	0	7897	0.065023	0	7897	0.062952	0
7902	0.063464	0	7902	0.06552	0	7902	0.064814	0	7902	0.065234	0	7902	0.064168	0	7902	0.064036	0	7902	0.065099	0	7902	0.063026	0
7907	0.063537	0	7907	0.065596	0	7907	0.06489	0	7907	0.06531	0	7907	0.064244	0	7907	0.064111	0	7907	0.065175	0	7907	0.0631	0
7912	0.063611	0	7912	0.065673	0	7912	0.064966	0	7912	0.065385	0	7912	0.064319	0	7912	0.064186	0	7912	0.065251	0	7912	0.063174	0
7917	0.063685	0	7917	0.06575	0	7917	0.065042	0	7917	0.065461	0	7917	0.064394	0	7917	0.064261	0	7917	0.065327	0	7917	0.063248	0
7922	0.063759	0	7922	0.065827	0	7922	0.065118	0	7922	0.065536	0	7922	0.06447	0	7922	0.064336	0	7922	0.065403	0	7922	0.063322	0
7927	0.063834	0	7927	0.065904	0	7927	0.065194	0	7927	0.065612	0	7927	0.064545	0	7927	0.064412	0	7927	0.06548	0	7927	0.063396	0
7932	0.063908	0	7932	0.065981	0	7932	0.06527	0	7932	0.065688	0	7932	0.06462	0	7932	0.064487	0	7932	0.065556	0	7932	0.06347	0
7937	0.063982	0	7937	0.066058	0	7937	0.065347	0	7937	0.065763	0	7937	0.064696	0	7937	0.064563	0	7937	0.065632	0	7937	0.063544	0
7942	0.064056	0	7942	0.066135	0	7942	0.065423	0	7942	0.065839	0	7942	0.064772	0	7942	0.064638	0	7942	0.065709	0	7942	0.063619	0
7947	0.06413	0	7947	0.066212	0	7947	0.065499	0	7947	0.065915	0	7947	0.064847	0	7947	0.064713	0	7947	0.065785	0	7947	0.063693	0
7952	0.064205	0	7952	0.066289	0	7952	0.065576	0	7952	0.065991	0	7952	0.064923	0	7952	0.064789	0	7952	0.065862	0	7952	0.063767	0
7957	0.064279	0	7957	0.066366	0	7957	0.065652	0	7957	0.066066	0	7957	0.064998	0	7957	0.064864	0	7957	0.065938	0	7957	0.063842	0
7962	0.064353	0	7962	0.066443	0	7962	0.065728	0	7962	0.066142	0	7962	0.065074	0	7962	0.06494	0	7962	0.066015	0	7962	0.063916	0
7967	0.064428	0	7967	0.06652	0	7967	0.065805	0	7967	0.066218	0	7967	0.06515	0	7967	0.065016	0	7967	0.066091	0	7967	0.06399	0
7972	0.064502	0	7972	0.066598	0	7972	0.065882	0	7972	0.066294	0	7972	0.065226	0	7972	0.065091	0	7972	0.066168	0	7972	0.064065	0
7977	0.064577	0	7977	0.066675	0	7977	0.065958	0	7977	0.06637	0	7977	0.065302	0	7977	0.065167	0	7977	0.066245	0	7977	0.064139	0
7982	0.064651	0	7982	0.066752	0	7982	0.066035	0	7982	0.066446	0	7982	0.065377	0	7982	0.065243	0	7982	0.066322	0	7982	0.064214	0
7987	0.064726	0	7987	0.06683	0	7987	0.066111	0	7987	0.066523	0	7987	0.065453	0	7987	0.065319	0	7987	0.066398	0	7987	0.064288	0
7992	0.064801	0	7992	0.066907	0	7992	0.066188	0	7992	0.066599	0	7992	0.065529	0	7992	0.065395	0	7992	0.066475	0	7992	0.064363	0
7997	0.064875	0	7997	0.066985	0	7997	0.066265	0	7997	0.066675	0	7997	0.065605	0	7997	0.065471	0	7997	0.066552	0	7997	0.064438	0
8002	0.06495	0	8002	0.067062	0	8002	0.066342	0	8002	0.066751	0	8002	0.065681	0	8002	0.065546	0	8002	0.066629	0	8002	0.064513	0
8007	0.065025	0	8007	0.06714	0	8007	0.066419	0	8007	0.066827	0	8007	0.065758	0	8007	0.065622	0	8007	0.066706	0	8007	0.064587	0
8012	0.0651	0	8012	0.067218	0	8012	0.066496	0	8012	0.066904	0	8012	0.065834	0	8012	0.065699	0	8012	0.066783	0	8012	0.064662	0
8017	0.065175	0	8017	0.067295	0	8017	0.066573	0	8017	0.06698	0	8017	0.06591	0	8017	0.065775	0	8017	0.06686	0	8017	0.064737	0
8022	0.065249	0	8022	0.067373	0	8022	0.06665	0	8022	0.067057	0	8022	0.065986	0	8022	0.065851	0	8022	0.066937	0	8022	0.064812	0
8027	0.065324	0	8027	0.067451	0	8027	0.066727	0	8027	0.067133	0	8027	0.066062	0	8027	0.065927	0	8027	0.067015	0	8027	0.064887	0
8032	0.065399	0	8032	0.067529	0	8032	0.066804	0	8032	0.06721	0	8032	0.066139	0	8032	0.066003	0	8032	0.067092	0	8032	0.064962	0
8037	0.065474	0	8037	0.067607	0	8037	0.066881	0	8037	0.067286	0	8037	0.066215	0	8037	0.066079	0	8037	0.067169	0	8037	0.065037	0
8042	0.065549	0	8042	0.067684	0	8042	0.066958	0	8042	0.067363	0	8042	0.066292	0	8042	0.066156	0	8042	0.067246	0	8042	0.065112	0
8047	0.065625	0	8047	0.067762	0	8047	0.067035	0	8047	0.067439	0	8047	0.066368	0	8047	0.066232	0	8047	0.067324	0	8047	0.065187	0
8052	0.0657	0	8052	0.06784	0	8052	0.067113	0	8052	0.067516	0	8052	0.066445	0	8052	0.066308	0	8052	0.067401	0	8052	0.065262	0
8057	0.065775	0	8057	0.067918	0	8057	0.06719	0	8057	0.067593	0	8057	0.066521	0	8057	0.066385	0	8057	0.067479	0	8057	0.065338	0
8062	0.06585	0	8062	0.067997	0	8062	0.067267	0	8062	0.06767	0	8062	0.066598	0	8062	0.066461	0	8062	0.067556	0	8062	0.065413	0
8067	0.065926	0	8067	0.068075	0	8067	0.067345	0	8067	0.067746	0	8067	0.066674	0	8067	0.066538	0	8067	0.067634	0	8067	0.065488	0
8072	0.066001	0	8072	0.068153	0	8072	0.067422	0	8072	0.067823	0	8072	0.066751	0	8072	0.066614	0	8072	0.067711	0	8072	0.065563	0
8077	0.066076	0	8077	0.068231	0	8077	0.0675	0	8077	0.0679	0	8077	0.066828	0	8077	0.066691	0	8077	0.067789	0	8077	0.065639	0
8082	0.066152	0	8082	0.068309	0	8082	0.067577	0	8082	0.067977	0	8082	0.066905	0	8082	0.066768	0	8082	0.067866	0	8082	0.065714	0
8087	0.066227	0	8087	0.068388	0	8087	0.067655	0	8087	0.068054	0	8087	0.066981	0	8087	0.066844	0	8087	0.067944	0	8087	0.06579	0
8092	0.066303	0	8092	0.068466	0	8092	0.067732	0	8092	0.068131	0	8092	0.067058	0	8092	0.066921	0	8092	0.068022	0	8092	0.065865	0
8097	0.066378	0	8097	0.068544	0	8097	0.06781	0	8097	0.068208	0	8097	0.067135	0	8097	0.066998	0	8097	0.0681	0	8097	0.065941	0
8102	0.066454	0	8102	0.068623	0	8102	0.067888	0	8102	0.068285	0	8102	0.067212	0	8102	0.067075	0	8102	0.068178	0	8102	0.066016	0
8107	0.066529	0	8107	0.068701	0	8107	0.067965	0	8107	0.068363	0	8107	0.067289	0	8107	0.067152	0	8107	0.068255	0	8107	0.066092	0
8112	0.066605	0	8112	0.06878	0	8112	0.068043	0	8112	0.06844	0	8112	0.067366	0	8112	0.067229	0	8112	0.068333	0	8112	0.066168	0
8117	0.066681	0	8117	0.068859	0	8117	0.068121	0	8117	0.068517	0	8117	0.067443	0	8117	0.067306	0	8117	0.068411	0	8117	0.066243	0
8122	0.066757	0	8122	0.068937	0	8122	0.068199	0	8122	0.068594	0	8122	0.06752	0	8122	0.067383	0	8122	0.068489	0	8122	0.066319	0
8127	0.066832	0	8127	0.069016	0	8127	0.068277	0	8127	0.068672	0	8127	0.067598	0	8127	0.06746	0	8127	0.068567	0	8127	0.066395	0
8132	0.066908	0	8132	0.069095	0	8132	0.068355	0	8132	0.068749	0	8132	0.067675	0	8132	0.067537	0	8132	0.068645	0	8132	0.066471	0
8137	0.066984	0	8137	0.069173	0	8137	0.068433	0	8137	0.068826	0	8137	0.067752	0	8137	0.067614	0	8137	0.068724	0	8137	0.066547	0
8142	0.06706	0	8142	0.069252	0	8142	0.068511	0	8142	0.068904	0	8142	0.067829	0	8142	0.067691	0	8142	0.068802	0	8142	0.066623	0
8147	0.067136	0	8147	0.069331	0	8147	0.068589	0	8147	0.068981	0	8147	0.067907	0	8147	0.067768	0	8147	0.06888	0	8147	0.066699	0
8152	0.067212	0	8152	0.06941	0	8152	0.068667	0	8152	0.069059	0	8152	0.067984	0	8152	0.067846	0	8152	0.068958	0	8152	0.066775	0
8157	0.067288	0	8157	0.069489	0	8157	0.068745	0	8157	0.069137	0	8157	0.068062	0	8157	0.067923	0	8157	0.069037	0	8157	0.066851	0
8162	0.067364	0	8162	0.069568	0	8162	0.068824	0	8162	0.069214	0	8162	0.068139	0	8162	0.068	0	8162	0.069115	0	8162	0.066927	0
8167	0.06744	0	8167	0.069647	0	8167	0.068902	0	8167	0.069292	0	8167	0.068217	0	8167	0.068078	0	8167	0.069193	0	8167	0.067003	0
8172	0.067517	0	8172	0.069726	0	8172	0.06898	0	8172	0.06937	0	8172	0.068294	0	8172	0.068155	0	8172	0.069272	0	8172	0.067079	0
8177	0.067593	0	8177	0.069805	0	8177	0.069059	0	8177	0.069447	0	8177	0.068372	0	8177	0.068233	0	8177	0.06935	0	8177	0.067156	0
8182	0.067669	0	8182	0.069884	0	8182	0.069137	0	8182	0.069525	0	8182	0.068449	0	8182	0.06831	0	8182	0.069429	0	8182	0.067232	0
8187	0.067745	0	8187	0.069963	0	8187	0.069216	0	8187	0.069603	0	8187	0.068527	0	8187	0.068388	0	8187	0.069508	0	8187	0.067308	0
8192	0.067822	0	8192	0.070043	0	8192	0.069294	0	8192	0.069681	0	8192	0.068605	0	8192	0.068465	0	8192	0.069586	0	8192	0.067385	0
8197	0.067898	0	8197	0.070122	0	8197	0.069373	0	8197	0.069759	0	8197	0.068683	0	8197	0.068543	0	8197	0.069665	0	8197	0.067461	0
8202	0.067975	0	8202	0.070201	0	8202	0.069451	0	8202	0.069837	0	8202	0.06876	0	8202	0.068621	0	8202	0.069744	0	8202	0.067537	0
8207	0.068051	0	8207	0.070281	0	8207	0.06953	0	8207	0.069915	0	8207	0.068838	0	8207	0.068699	0	8207	0.069822	0	8207	0.067614	0
8212	0.068128	0	8212	0.07036	0	8212	0.069609	0	8212	0.069993	0	8212	0.068916	0	8212	0.068776	0	8212	0.069901	0	8212	0.067691	0
8217	0.068204	0	8217	0.07044	0	8217	0.069687	0	8217	0.070071	0	8217	0.068994	0	8217	0.068854	0	8217	0.06998	0	8217	0.067767	0
8222	0.068281	0	8222	0.070519	0	8222	0.069766	0	8222	0.070149	0	8222	0.069072	0	8222	0.068932	0	8222	0.070059	0	8222	0.067844	0
8227	0.068358	0	8227	0.070599	0	8227	0.069845	0	8227	0.070228	0	8227	0.06915	0	8227	0.06901	0	8227	0.070138	0	8227	0.06792	0
8232	0.068434	0	8232	0.070678	0	8232	0.069924	0	8232	0.070306	0	8232	0.069228	0	8232	0.069088	0	8232	0.070217	0	8232	0.067997	0
8237	0.068511	0	8237	0.070758	0	8237	0.070003	0	8237	0.070384	0	8237	0.069307	0	8237	0.069166	0	8237	0.070296	0	8237	0.068074	0
8242	0.068588	0	8242	0.070838	0	8242	0.070082	0	8242	0.070463	0	8242	0.069385	0	8242	0.069244	0	8242	0.070375	0	8242	0.068151	0
8247	0.068665	0	8247	0.070918	0	8247	0.070161	0	8247	0.070541	0	8247	0.069463	0	8247	0.069322	0	8247	0.070454	0	8247	0.068228	0
8252	0.068742	0	8252	0.070997	0	8252	0.07024	0	8252	0.070619	0	8252	0.069541	0	8252	0.0694	0	8252	0.070533	0	8252	0.068305	0
8257	0.068819	0	8257	0.071077	0	8257	0.070319	0	8257	0.070698	0	8257	0.06962	0	8257	0.069479	0	8257	0.070613	0	8257	0.068381	0
8262	0.068896	0	8262	0.071157	0	8262	0.070398	0	8262	0.070776	0	8262	0.069698	0	8262	0.069557	0	8262	0.070692	0	8262	0.068458	0
8267	0.068973	0	8267	0.071237	0	8267	0.070477	0	8267	0.070855	0	8267	0.069776	0	8267	0.069635	0	8267	0.070771	0	8267	0.068536	0
8272	0.06905	0	8272	0.071317	0	8272	0.070556	0	8272	0.070933	0	8272	0.069855	0	8272	0.069713	0	8272	0.070851	0	8272	0.068613	0
8277	0.069127	0	8277	0.071397	0	8277	0.070636	0	8277	0.071012	0	8277	0.069933	0	8277	0.069792	0	8277	0.07093	0	8277	0.06869	0
8282	0.069204	0	8282	0.071477	0	8282	0.070715	0	8282	0.071091	0	8282	0.070012	0	8282	0.06987	0	8282	0.071009	0	8282	0.068767	0
8287	0.069281	0	8287	0.071557	0	8287	0.070794	0	8287	0.07117	0	8287	0.07009	0	8287	0.069949	0	8287	0.071089	0	8287	0.068844	0
8292	0.069358	0	8292	0.071637	0	8292	0.070874	0	8292	0.071248	0	8292	0.070169	0	8292	0.070027	0	8292	0.071168	0	8292	0.068921	0
8297	0.069436	0	8297	0.071718	0	8297	0.070953	0	8297	0.071327	0	8297	0.070248	0	8297	0.070106	0	8297	0.071248	0	8297	0.068999	0
8302	0.069513	0	8302	0.071798	0	8302	0.071033	0	8302	0.071406	0	8302	0.070326	0	8302	0.070184	0	8302	0.071328	0	8302	0.069076	0
8307	0.06959	0	8307	0.071878	0	8307	0.071112	0	8307	0.071485	0	8307	0.070405	0	8307	0.070263	0	8307	0.071407	0	8307	0.069153	0
8312	0.069668	0	8312	0.071958	0	8312	0.071192	0	8312	0.071564	0	8312	0.070484	0	8312	0.070342	0	8312	0.071487	0	8312	0.069231	0
8317	0.069745	0	8317	0.072039	0	8317	0.071271	0	8317	0.071643	0	8317	0.070563	0	8317	0.07042	0	8317	0.071567	0	8317	0.069308	0
8322	0.069823	0	8322	0.072119	0	8322	0.071351	0	8322	0.071722	0	8322	0.070642	0	8322	0.070499	0	8322	0.071646	0	8322	0.069386	0
8327	0.0699	0	8327	0.0722	0	8327	0.071431	0	8327	0.071801	0	8327	0.070721	0	8327	0.070578	0	8327	0.071726	0	8327	0.069463	0
8332	0.069978	0	8332	0.07228	0	8332	0.071511	0	8332	0.07188	0	8332	0.0708	0	8332	0.070657	0	8332	0.071806	0	8332	0.069541	0
8337	0.070055	0	8337	0.072361	0	8337	0.07159	0	8337	0.071959	0	8337	0.070879	0	8337	0.070736	0	8337	0.071886	0	8337	0.069618	0
8342	0.070133	0	8342	0.072441	0	8342	0.07167	0	8342	0.072039	0	8342	0.070958	0	8342	0.070815	0	8342	0.071966	0	8342	0.069696	0
8347	0.070211	0	8347	0.072522	0	8347	0.07175	0	8347	0.072118	0	8347	0.071037	0	8347	0.070894	0	8347	0.072046	0	8347	0.069774	0
8352	0.070288	0	8352	0.072603	0	8352	0.07183	0	8352	0.072197	0	8352	0.071116	0	8352	0.070973	0	8352	0.072126	0	8352	0.069852	0
8357	0.070366	0	8357	0.072683	0	8357	0.07191	0	8357	0.072276	0	8357	0.071195	0	8357	0.071052	0	8357	0.072206	0	8357	0.069929	0
8362	0.070444	0	8362	0.072764	0	8362	0.07199	0	8362	0.072356	0	8362	0.071274	0	8362	0.071131	0	8362	0.072286	0	8362	0.070007	0
8367	0.070522	0	8367	0.072845	0	8367	0.07207	0	8367	0.072435	0	8367	0.071354	0	8367	0.07121	0	8367	0.072367	0	8367	0.070085	0
8372	0.0706	0	8372	0.072926	0	8372	0.07215	0	8372	0.072515	0	8372	0.071433	0	8372	0.071289	0	8372	0.072447	0	8372	0.070163	0
8377	0.070678	0	8377	0.073007	0	8377	0.07223	0	8377	0.072594	0	8377	0.071512	0	8377	0.071369	0	8377	0.072527	0	8377	0.070241	0
8382	0.070756	0	8382	0.073088	0	8382	0.072311	0	8382	0.072674	0	8382	0.071592	0	8382	0.071448	0	8382	0.072607	0	8382	0.070319	0
8387	0.070834	0	8387	0.073169	0	8387	0.072391	0	8387	0.072753	0	8387	0.071671	0	8387	0.071527	0	8387	0.072688	0	8387	0.070397	0
8392	0.070912	0	8392	0.07325	0	8392	0.072471	0	8392	0.072833	0	8392	0.071751	0	8392	0.071607	0	8392	0.072768	0	8392	0.070475	0
8397	0.07099	0	8397	0.073331	0	8397	0.072551	0	8397	0.072913	0	8397	0.07183	0	8397	0.071686	0	8397	0.072849	0	8397	0.070553	0
8402	0.071068	0	8402	0.073412	0	8402	0.072632	0	8402	0.072993	0	8402	0.07191	0	8402	0.071766	0	8402	0.072929	0	8402	0.070632	0
8407	0.071146	0	8407	0.073493	0	8407	0.072712	0	8407	0.073072	0	8407	0.07199	0	8407	0.071845	0	8407	0.07301	0	8407	0.07071	0
8412	0.071225	0	8412	0.073575	0	8412	0.072793	0	8412	0.073152	0	8412	0.072069	0	8412	0.071925	0	8412	0.07309	0	8412	0.070788	0
8417	0.071303	0	8417	0.073656	0	8417	0.072873	0	8417	0.073232	0	8417	0.072149	0	8417	0.072004	0	8417	0.073171	0	8417	0.070867	0
8422	0.071381	0	8422	0.073737	0	8422	0.072954	0	8422	0.073312	0	8422	0.072229	0	8422	0.072084	0	8422	0.073252	0	8422	0.070945	0
8427	0.07146	0	8427	0.073819	0	8427	0.073034	0	8427	0.073392	0	8427	0.072309	0	8427	0.072164	0	8427	0.073332	0	8427	0.071023	0
8432	0.071538	0	8432	0.0739	0	8432	0.073115	0	8432	0.073472	0	8432	0.072388	0	8432	0.072243	0	8432	0.073413	0	8432	0.071102	0
8437	0.071617	0	8437	0.073981	0	8437	0.073196	0	8437	0.073552	0	8437	0.072468	0	8437	0.072323	0	8437	0.073494	0	8437	0.07118	0
8442	0.071695	0	8442	0.074063	0	8442	0.073277	0	8442	0.073632	0	8442	0.072548	0	8442	0.072403	0	8442	0.073575	0	8442	0.071259	0
8447	0.071774	0	8447	0.074144	0	8447	0.073357	0	8447	0.073712	0	8447	0.072628	0	8447	0.072483	0	8447	0.073656	0	8447	0.071337	0
8452	0.071852	0	8452	0.074226	0	8452	0.073438	0	8452	0.073792	0	8452	0.072708	0	8452	0.072563	0	8452	0.073737	0	8452	0.071416	0
8457	0.071931	0	8457	0.074308	0	8457	0.073519	0	8457	0.073873	0	8457	0.072788	0	8457	0.072643	0	8457	0.073818	0	8457	0.071495	0
8462	0.07201	0	8462	0.074389	0	8462	0.0736	0	8462	0.073953	0	8462	0.072869	0	8462	0.072723	0	8462	0.073899	0	8462	0.071573	0
8467	0.072088	0	8467	0.074471	0	8467	0.073681	0	8467	0.074033	0	8467	0.072949	0	8467	0.072803	0	8467	0.07398	0	8467	0.071652	0
8472	0.072167	0	8472	0.074553	0	8472	0.073762	0	8472	0.074113	0	8472	0.073029	0	8472	0.072883	0	8472	0.074061	0	8472	0.071731	0
8477	0.072246	0	8477	0.074635	0	8477	0.073843	0	8477	0.074194	0	8477	0.073109	0	8477	0.072963	0	8477	0.074142	0	8477	0.07181	0
8482	0.072325	0	8482	0.074717	0	8482	0.073924	0	8482	0.074274	0	8482	0.07319	0	8482	0.073043	0	8482	0.074223	0	8482	0.071889	0
8487	0.072404	0	8487	0.074798	0	8487	0.074005	0	8487	0.074355	0	8487	0.07327	0	8487	0.073123	0	8487	0.074305	0	8487	0.071968	0
8492	0.072483	0	8492	0.07488	0	8492	0.074086	0	8492	0.074435	0	8492	0.07335	0	8492	0.073204	0	8492	0.074386	0	8492	0.072047	0
8497	0.072562	0	8497	0.074962	0	8497	0.074168	0	8497	0.074516	0	8497	0.073431	0	8497	0.073284	0	8497	0.074467	0	8497	0.072126	0
8502	0.072641	0	8502	0.075044	0	8502	0.074249	0	8502	0.074596	0	8502	0.073511	0	8502	0.073364	0	8502	0.074549	0	8502	0.072205	0
8507	0.07272	0	8507	0.075127	0	8507	0.07433	0	8507	0.074677	0	8507	0.073592	0	8507	0.073445	0	8507	0.07463	0	8507	0.072284	0
8512	0.072799	0	8512	0.075209	0	8512	0.074412	0	8512	0.074758	0	8512	0.073672	0	8512	0.073525	0	8512	0.074712	0	8512	0.072363	0
8517	0.072878	0	8517	0.075291	0	8517	0.074493	0	8517	0.074839	0	8517	0.073753	0	8517	0.073606	0	8517	0.074793	0	8517	0.072442	0
8522	0.072957	0	8522	0.075373	0	8522	0.074574	0	8522	0.074919	0	8522	0.073834	0	8522	0.073686	0	8522	0.074875	0	8522	0.072521	0
8527	0.073037	0	8527	0.075455	0	8527	0.074656	0	8527	0.075	0	8527	0.073914	0	8527	0.073767	0	8527	0.074956	0	8527	0.072601	0
8532	0.073116	0	8532	0.075538	0	8532	0.074737	0	8532	0.075081	0	8532	0.073995	0	8532	0.073847	0	8532	0.075038	0	8532	0.07268	0
8537	0.073195	0	8537	0.07562	0	8537	0.074819	0	8537	0.075162	0	8537	0.074076	0	8537	0.073928	0	8537	0.07512	0	8537	0.072759	0
8542	0.073275	0	8542	0.075702	0	8542	0.074901	0	8542	0.075243	0	8542	0.074157	0	8542	0.074009	0	8542	0.075202	0	8542	0.072839	0
8547	0.073354	0	8547	0.075785	0	8547	0.074982	0	8547	0.075324	0	8547	0.074237	0	8547	0.07409	0	8547	0.075283	0	8547	0.072918	0
8552	0.073433	0	8552	0.075867	0	8552	0.075064	0	8552	0.075405	0	8552	0.074318	0	8552	0.07417	0	8552	0.075365	0	8552	0.072998	0
8557	0.073513	0	8557	0.07595	0	8557	0.075146	0	8557	0.075486	0	8557	0.074399	0	8557	0.074251	0	8557	0.075447	0	8557	0.073077	0
8562	0.073592	0	8562	0.076032	0	8562	0.075228	0	8562	0.075567	0	8562	0.07448	0	8562	0.074332	0	8562	0.075529	0	8562	0.073157	0
8567	0.073672	0	8567	0.076115	0	8567	0.07531	0	8567	0.075648	0	8567	0.074561	0	8567	0.074413	0	8567	0.075611	0	8567	0.073237	0
8572	0.073752	0	8572	0.076198	0	8572	0.075391	0	8572	0.07573	0	8572	0.074642	0	8572	0.074494	0	8572	0.075693	0	8572	0.073316	0
8577	0.073831	0	8577	0.076281	0	8577	0.075473	0	8577	0.075811	0	8577	0.074724	0	8577	0.074575	0	8577	0.075775	0	8577	0.073396	0
8582	0.073911	0	8582	0.076363	0	8582	0.075555	0	8582	0.075892	0	8582	0.074805	0	8582	0.074656	0	8582	0.075857	0	8582	0.073476	0
8587	0.073991	0	8587	0.076446	0	8587	0.075637	0	8587	0.075973	0	8587	0.074886	0	8587	0.074737	0	8587	0.075939	0	8587	0.073556	0
8592	0.074071	0	8592	0.076529	0	8592	0.075719	0	8592	0.076055	0	8592	0.074967	0	8592	0.074818	0	8592	0.076021	0	8592	0.073635	0
8597	0.074151	0	8597	0.076612	0	8597	0.075802	0	8597	0.076136	0	8597	0.075049	0	8597	0.0749	0	8597	0.076104	0	8597	0.073715	0
8602	0.07423	0	8602	0.076695	0	8602	0.075884	0	8602	0.076218	0	8602	0.07513	0	8602	0.074981	0	8602	0.076186	0	8602	0.073795	0
8607	0.07431	0	8607	0.076778	0	8607	0.075966	0	8607	0.076299	0	8607	0.075211	0	8607	0.075062	0	8607	0.076268	0	8607	0.073875	0
8612	0.07439	0	8612	0.076861	0	8612	0.076048	0	8612	0.076381	0	8612	0.075293	0	8612	0.075143	0	8612	0.076351	0	8612	0.073955	0
8617	0.07447	0	8617	0.076944	0	8617	0.07613	0	8617	0.076463	0	8617	0.075374	0	8617	0.075225	0	8617	0.076433	0	8617	0.074035	0
8622	0.07455	0	8622	0.077027	0	8622	0.076213	0	8622	0.076544	0	8622	0.075456	0	8622	0.075306	0	8622	0.076516	0	8622	0.074115	0
8627	0.074631	0	8627	0.07711	0	8627	0.076295	0	8627	0.076626	0	8627	0.075537	0	8627	0.075388	0	8627	0.076598	0	8627	0.074196	0
8632	0.074711	0	8632	0.077193	0	8632	0.076378	0	8632	0.076708	0	8632	0.075619	0	8632	0.075469	0	8632	0.076681	0	8632	0.074276	0
8637	0.074791	0	8637	0.077277	0	8637	0.07646	0	8637	0.076789	0	8637	0.075701	0	8637	0.075551	0	8637	0.076763	0	8637	0.074356	0
8642	0.074871	0	8642	0.07736	0	8642	0.076543	0	8642	0.076871	0	8642	0.075782	0	8642	0.075632	0	8642	0.076846	0	8642	0.074436	0
8647	0.074951	0	8647	0.077443	0	8647	0.076625	0	8647	0.076953	0	8647	0.075864	0	8647	0.075714	0	8647	0.076929	0	8647	0.074517	0
8652	0.075032	0	8652	0.077527	0	8652	0.076708	0	8652	0.077035	0	8652	0.075946	0	8652	0.075796	0	8652	0.077011	0	8652	0.074597	0
8657	0.075112	0	8657	0.07761	0	8657	0.07679	0	8657	0.077117	0	8657	0.076028	0	8657	0.075877	0	8657	0.077094	0	8657	0.074677	0
8662	0.075193	0	8662	0.077694	0	8662	0.076873	0	8662	0.077199	0	8662	0.07611	0	8662	0.075959	0	8662	0.077177	0	8662	0.074758	0
8667	0.075273	0	8667	0.077777	0	8667	0.076956	0	8667	0.077281	0	8667	0.076192	0	8667	0.076041	0	8667	0.07726	0	8667	0.074838	0
8672	0.075354	0	8672	0.077861	0	8672	0.077039	0	8672	0.077363	0	8672	0.076274	0	8672	0.076123	0	8672	0.077343	0	8672	0.074919	0
8677	0.075434	0	8677	0.077944	0	8677	0.077122	0	8677	0.077445	0	8677	0.076356	0	8677	0.076205	0	8677	0.077426	0	8677	0.074999	0
8682	0.075515	0	8682	0.078028	0	8682	0.077204	0	8682	0.077527	0	8682	0.076438	0	8682	0.076287	0	8682	0.077509	0	8682	0.07508	0
8687	0.075595	0	8687	0.078112	0	8687	0.077287	0	8687	0.07761	0	8687	0.07652	0	8687	0.076369	0	8687	0.077592	0	8687	0.075161	0
8692	0.075676	0	8692	0.078195	0	8692	0.07737	0	8692	0.077692	0	8692	0.076602	0	8692	0.076451	0	8692	0.077675	0	8692	0.075241	0
8697	0.075757	0	8697	0.078279	0	8697	0.077453	0	8697	0.077774	0	8697	0.076684	0	8697	0.076533	0	8697	0.077758	0	8697	0.075322	0
8702	0.075837	0	8702	0.078363	0	8702	0.077536	0	8702	0.077857	0	8702	0.076766	0	8702	0.076615	0	8702	0.077841	0	8702	0.075403	0
8707	0.075918	0	8707	0.078447	0	8707	0.077619	0	8707	0.077939	0	8707	0.076849	0	8707	0.076697	0	8707	0.077924	0	8707	0.075484	0
8712	0.075999	0	8712	0.078531	0	8712	0.077703	0	8712	0.078021	0	8712	0.076931	0	8712	0.076779	0	8712	0.078008	0	8712	0.075565	0
8717	0.07608	0	8717	0.078615	0	8717	0.077786	0	8717	0.078104	0	8717	0.077013	0	8717	0.076861	0	8717	0.078091	0	8717	0.075646	0
8722	0.076161	0	8722	0.078699	0	8722	0.077869	0	8722	0.078186	0	8722	0.077096	0	8722	0.076944	0	8722	0.078174	0	8722	0.075727	0
8727	0.076242	0	8727	0.078783	0	8727	0.077952	0	8727	0.078269	0	8727	0.077178	0	8727	0.077026	0	8727	0.078258	0	8727	0.075808	0
8732	0.076323	0	8732	0.078867	0	8732	0.078036	0	8732	0.078352	0	8732	0.077261	0	8732	0.077108	0	8732	0.078341	0	8732	0.075889	0
8737	0.076404	0	8737	0.078951	0	8737	0.078119	0	8737	0.078434	0	8737	0.077343	0	8737	0.077191	0	8737	0.078425	0	8737	0.07597	0
8742	0.076485	0	8742	0.079035	0	8742	0.078202	0	8742	0.078517	0	8742	0.077426	0	8742	0.077273	0	8742	0.078508	0	8742	0.076051	0
8747	0.076566	0	8747	0.07912	0	8747	0.078286	0	8747	0.0786	0	8747	0.077509	0	8747	0.077356	0	8747	0.078592	0	8747	0.076132	0
8752	0.076647	0	8752	0.079204	0	8752	0.078369	0	8752	0.078683	0	8752	0.077591	0	8752	0.077438	0	8752	0.078675	0	8752	0.076213	0
8757	0.076729	0	8757	0.079288	0	8757	0.078453	0	8757	0.078765	0	8757	0.077674	0	8757	0.077521	0	8757	0.078759	0	8757	0.076295	0
8762	0.07681	0	8762	0.079373	0	8762	0.078536	0	8762	0.078848	0	8762	0.077757	0	8762	0.077604	0	8762	0.078843	0	8762	0.076376	0
8767	0.076891	0	8767	0.079457	0	8767	0.07862	0	8767	0.078931	0	8767	0.07784	0	8767	0.077686	0	8767	0.078926	0	8767	0.076457	0
8772	0.076973	0	8772	0.079541	0	8772	0.078704	0	8772	0.079014	0	8772	0.077922	0	8772	0.077769	0	8772	0.07901	0	8772	0.076539	0
8777	0.077054	0	8777	0.079626	0	8777	0.078787	0	8777	0.079097	0	8777	0.078005	0	8777	0.077852	0	8777	0.079094	0	8777	0.07662	0
8782	0.077135	0	8782	0.07971	0	8782	0.078871	0	8782	0.07918	0	8782	0.078088	0	8782	0.077935	0	8782	0.079178	0	8782	0.076702	0
8787	0.077217	0	8787	0.079795	0	8787	0.078955	0	8787	0.079263	0	8787	0.078171	0	8787	0.078018	0	8787	0.079262	0	8787	0.076783	0
8792	0.077298	0	8792	0.07988	0	8792	0.079039	0	8792	0.079346	0	8792	0.078254	0	8792	0.078101	0	8792	0.079346	0	8792	0.076865	0
8797	0.07738	0	8797	0.079964	0	8797	0.079123	0	8797	0.07943	0	8797	0.078337	0	8797	0.078183	0	8797	0.07943	0	8797	0.076946	0
8802	0.077462	0	8802	0.080049	0	8802	0.079207	0	8802	0.079513	0	8802	0.078421	0	8802	0.078266	0	8802	0.079514	0	8802	0.077028	0
8807	0.077543	0	8807	0.080134	0	8807	0.079291	0	8807	0.079596	0	8807	0.078504	0	8807	0.07835	0	8807	0.079598	0	8807	0.07711	0
8812	0.077625	0	8812	0.080219	0	8812	0.079375	0	8812	0.079679	0	8812	0.078587	0	8812	0.078433	0	8812	0.079682	0	8812	0.077191	0
8817	0.077707	0	8817	0.080304	0	8817	0.079459	0	8817	0.079763	0	8817	0.07867	0	8817	0.078516	0	8817	0.079766	0	8817	0.077273	0
8822	0.077788	0	8822	0.080389	0	8822	0.079543	0	8822	0.079846	0	8822	0.078753	0	8822	0.078599	0	8822	0.079851	0	8822	0.077355	0
8827	0.07787	0	8827	0.080473	0	8827	0.079627	0	8827	0.07993	0	8827	0.078837	0	8827	0.078682	0	8827	0.079935	0	8827	0.077437	0
8832	0.077952	0	8832	0.080558	0	8832	0.079711	0	8832	0.080013	0	8832	0.07892	0	8832	0.078765	0	8832	0.080019	0	8832	0.077519	0
8837	0.078034	0	8837	0.080644	0	8837	0.079796	0	8837	0.080097	0	8837	0.079004	0	8837	0.078849	0	8837	0.080104	0	8837	0.077601	0
8842	0.078116	0	8842	0.080729	0	8842	0.07988	0	8842	0.08018	0	8842	0.079087	0	8842	0.078932	0	8842	0.080188	0	8842	0.077683	0
8847	0.078198	0	8847	0.080814	0	8847	0.079964	0	8847	0.080264	0	8847	0.079171	0	8847	0.079015	0	8847	0.080272	0	8847	0.077765	0
8852	0.07828	0	8852	0.080899	0	8852	0.080049	0	8852	0.080347	0	8852	0.079254	0	8852	0.079099	0	8852	0.080357	0	8852	0.077847	0
8857	0.078362	0	8857	0.080984	0	8857	0.080133	0	8857	0.080431	0	8857	0.079338	0	8857	0.079182	0	8857	0.080442	0	8857	0.077929	0
8862	0.078444	0	8862	0.081069	0	8862	0.080218	0	8862	0.080515	0	8862	0.079421	0	8862	0.079266	0	8862	0.080526	0	8862	0.078011	0
8867	0.078527	0	8867	0.081155	0	8867	0.080302	0	8867	0.080599	0	8867	0.079505	0	8867	0.079349	0	8867	0.080611	0	8867	0.078094	0
8872	0.078609	0	8872	0.08124	0	8872	0.080387	0	8872	0.080683	0	8872	0.079589	0	8872	0.079433	0	8872	0.080695	0	8872	0.078176	0
8877	0.078691	0	8877	0.081326	0	8877	0.080471	0	8877	0.080766	0	8877	0.079673	0	8877	0.079517	0	8877	0.08078	0	8877	0.078258	0
8882	0.078773	0	8882	0.081411	0	8882	0.080556	0	8882	0.08085	0	8882	0.079757	0	8882	0.0796	0	8882	0.080865	0	8882	0.078341	0
8887	0.078856	0	8887	0.081496	0	8887	0.080641	0	8887	0.080934	0	8887	0.07984	0	8887	0.079684	0	8887	0.08095	0	8887	0.078423	0
8892	0.078938	0	8892	0.081582	0	8892	0.080725	0	8892	0.081018	0	8892	0.079924	0	8892	0.079768	0	8892	0.081035	0	8892	0.078505	0
8897	0.07902	0	8897	0.081668	0	8897	0.08081	0	8897	0.081102	0	8897	0.080008	0	8897	0.079852	0	8897	0.08112	0	8897	0.078588	0
8902	0.079103	0	8902	0.081753	0	8902	0.080895	0	8902	0.081186	0	8902	0.080092	0	8902	0.079936	0	8902	0.081205	0	8902	0.07867	0
8907	0.079185	0	8907	0.081839	0	8907	0.08098	0	8907	0.081271	0	8907	0.080176	0	8907	0.08002	0	8907	0.08129	0	8907	0.078753	0
8912	0.079268	0	8912	0.081925	0	8912	0.081065	0	8912	0.081355	0	8912	0.08026	0	8912	0.080104	0	8912	0.081375	0	8912	0.078836	0
8917	0.079351	0	8917	0.08201	0	8917	0.08115	0	8917	0.081439	0	8917	0.080345	0	8917	0.080188	0	8917	0.08146	0	8917	0.078918	0
8922	0.079433	0	8922	0.082096	0	8922	0.081235	0	8922	0.081523	0	8922	0.080429	0	8922	0.080272	0	8922	0.081545	0	8922	0.079001	0
8927	0.079516	0	8927	0.082182	0	8927	0.08132	0	8927	0.081608	0	8927	0.080513	0	8927	0.080356	0	8927	0.08163	0	8927	0.079084	0
8932	0.079599	0	8932	0.082268	0	8932	0.081405	0	8932	0.081692	0	8932	0.080597	0	8932	0.08044	0	8932	0.081715	0	8932	0.079167	0
8937	0.079682	0	8937	0.082354	0	8937	0.08149	0	8937	0.081776	0	8937	0.080682	0	8937	0.080524	0	8937	0.0818	0	8937	0.079249	0
8942	0.079764	0	8942	0.08244	0	8942	0.081575	0	8942	0.081861	0	8942	0.080766	0	8942	0.080608	0	8942	0.081886	0	8942	0.079332	0
8947	0.079847	0	8947	0.082526	0	8947	0.081661	0	8947	0.081945	0	8947	0.08085	0	8947	0.080693	0	8947	0.081971	0	8947	0.079415	0
8952	0.07993	0	8952	0.082612	0	8952	0.081746	0	8952	0.08203	0	8952	0.080935	0	8952	0.080777	0	8952	0.082056	0	8952	0.079498	0
8957	0.080013	0	8957	0.082698	0	8957	0.081831	0	8957	0.082114	0	8957	0.081019	0	8957	0.080861	0	8957	0.082142	0	8957	0.079581	0
8962	0.080096	0	8962	0.082784	0	8962	0.081916	0	8962	0.082199	0	8962	0.081104	0	8962	0.080946	0	8962	0.082227	0	8962	0.079664	0
8967	0.080179	0	8967	0.082871	0	8967	0.082002	0	8967	0.082284	0	8967	0.081188	0	8967	0.08103	0	8967	0.082313	0	8967	0.079747	0
8972	0.080262	0	8972	0.082957	0	8972	0.082087	0	8972	0.082368	0	8972	0.081273	0	8972	0.081115	0	8972	0.082399	0	8972	0.07983	0
8977	0.080345	0	8977	0.083043	0	8977	0.082173	0	8977	0.082453	0	8977	0.081358	0	8977	0.081199	0	8977	0.082484	0	8977	0.079914	0
8982	0.080428	0	8982	0.083129	0	8982	0.082258	0	8982	0.082538	0	8982	0.081442	0	8982	0.081284	0	8982	0.08257	0	8982	0.079997	0
8987	0.080512	0	8987	0.083216	0	8987	0.082344	0	8987	0.082623	0	8987	0.081527	0	8987	0.081368	0	8987	0.082656	0	8987	0.08008	0
8992	0.080595	0	8992	0.083302	0	8992	0.08243	0	8992	0.082708	0	8992	0.081612	0	8992	0.081453	0	8992	0.082741	0	8992	0.080163	0
8997	0.080678	0	8997	0.083389	0	8997	0.082515	0	8997	0.082793	0	8997	0.081697	0	8997	0.081538	0	8997	0.082827	0	8997	0.080247	0
9002	0.080762	0	9002	0.083475	0	9002	0.082601	0	9002	0.082878	0	9002	0.081782	0	9002	0.081623	0	9002	0.082913	0	9002	0.08033	0
9007	0.080845	0	9007	0.083562	0	9007	0.082687	0	9007	0.082963	0	9007	0.081867	0	9007	0.081707	0	9007	0.082999	0	9007	0.080414	0
9012	0.080928	0	9012	0.083649	0	9012	0.082773	0	9012	0.083048	0	9012	0.081952	0	9012	0.081792	0	9012	0.083085	0	9012	0.080497	0
9017	0.081012	0	9017	0.083735	0	9017	0.082858	0	9017	0.083133	0	9017	0.082037	0	9017	0.081877	0	9017	0.083171	0	9017	0.080581	0
9022	0.081095	0	9022	0.083822	0	9022	0.082944	0	9022	0.083218	0	9022	0.082122	0	9022	0.081962	0	9022	0.083257	0	9022	0.080664	0
9027	0.081179	0	9027	0.083909	0	9027	0.08303	0	9027	0.083303	0	9027	0.082207	0	9027	0.082047	0	9027	0.083343	0	9027	0.080748	0
9032	0.081262	0	9032	0.083995	0	9032	0.083116	0	9032	0.083388	0	9032	0.082292	0	9032	0.082132	0	9032	0.083429	0	9032	0.080831	0
9037	0.081346	0	9037	0.084082	0	9037	0.083202	0	9037	0.083474	0	9037	0.082377	0	9037	0.082217	0	9037	0.083515	0	9037	0.080915	0
9042	0.08143	0	9042	0.084169	0	9042	0.083288	0	9042	0.083559	0	9042	0.082462	0	9042	0.082302	0	9042	0.083601	0	9042	0.080999	0
9047	0.081514	0	9047	0.084256	0	9047	0.083375	0	9047	0.083644	0	9047	0.082548	0	9047	0.082387	0	9047	0.083687	0	9047	0.081083	0
9052	0.081597	0	9052	0.084343	0	9052	0.083461	0	9052	0.08373	0	9052	0.082633	0	9052	0.082473	0	9052	0.083774	0	9052	0.081167	0
9057	0.081681	0	9057	0.08443	0	9057	0.083547	0	9057	0.083815	0	9057	0.082718	0	9057	0.082558	0	9057	0.08386	0	9057	0.08125	0
9062	0.081765	0	9062	0.084517	0	9062	0.083633	0	9062	0.083901	0	9062	0.082804	0	9062	0.082643	0	9062	0.083946	0	9062	0.081334	0
9067	0.081849	0	9067	0.084604	0	9067	0.083719	0	9067	0.083986	0	9067	0.082889	0	9067	0.082729	0	9067	0.084033	0	9067	0.081418	0
9072	0.081933	0	9072	0.084691	0	9072	0.083806	0	9072	0.084072	0	9072	0.082975	0	9072	0.082814	0	9072	0.084119	0	9072	0.081502	0
9077	0.082017	0	9077	0.084779	0	9077	0.083892	0	9077	0.084157	0	9077	0.08306	0	9077	0.082899	0	9077	0.084206	0	9077	0.081586	0
9082	0.082101	0	9082	0.084866	0	9082	0.083979	0	9082	0.084243	0	9082	0.083146	0	9082	0.082985	0	9082	0.084292	0	9082	0.08167	0
9087	0.082185	0	9087	0.084953	0	9087	0.084065	0	9087	0.084329	0	9087	0.083231	0	9087	0.08307	0	9087	0.084379	0	9087	0.081755	0
9092	0.082269	0	9092	0.085041	0	9092	0.084152	0	9092	0.084414	0	9092	0.083317	0	9092	0.083156	0	9092	0.084466	0	9092	0.081839	0
9097	0.082353	0	9097	0.085128	0	9097	0.084238	0	9097	0.0845	0	9097	0.083403	0	9097	0.083241	0	9097	0.084552	0	9097	0.081923	0
9102	0.082437	0	9102	0.085215	0	9102	0.084325	0	9102	0.084586	0	9102	0.083489	0	9102	0.083327	0	9102	0.084639	0	9102	0.082007	0
9107	0.082522	0	9107	0.085303	0	9107	0.084412	0	9107	0.084672	0	9107	0.083574	0	9107	0.083413	0	9107	0.084726	0	9107	0.082092	0
9112	0.082606	0	9112	0.08539	0	9112	0.084498	0	9112	0.084758	0	9112	0.08366	0	9112	0.083499	0	9112	0.084813	0	9112	0.082176	0
9117	0.08269	0	9117	0.085478	0	9117	0.084585	0	9117	0.084844	0	9117	0.083746	0	9117	0.083584	0	9117	0.0849	0	9117	0.08226	0
9122	0.082775	0	9122	0.085565	0	9122	0.084672	0	9122	0.08493	0	9122	0.083832	0	9122	0.08367	0	9122	0.084986	0	9122	0.082345	0
9127	0.082859	0	9127	0.085653	0	9127	0.084759	0	9127	0.085016	0	9127	0.083918	0	9127	0.083756	0	9127	0.085073	0	9127	0.082429	0
9132	0.082943	0	9132	0.085741	0	9132	0.084845	0	9132	0.085102	0	9132	0.084004	0	9132	0.083842	0	9132	0.08516	0	9132	0.082514	0
9137	0.083028	0	9137	0.085829	0	9137	0.084932	0	9137	0.085188	0	9137	0.08409	0	9137	0.083928	0	9137	0.085247	0	9137	0.082598	0
9142	0.083112	0	9142	0.085916	0	9142	0.085019	0	9142	0.085274	0	9142	0.084176	0	9142	0.084014	0	9142	0.085335	0	9142	0.082683	0
9147	0.083197	0	9147	0.086004	0	9147	0.085106	0	9147	0.085361	0	9147	0.084263	0	9147	0.0841	0	9147	0.085422	0	9147	0.082768	0
9152	0.083282	0	9152	0.086092	0	9152	0.085193	0	9152	0.085447	0	9152	0.084349	0	9152	0.084186	0	9152	0.085509	0	9152	0.082852	0
9157	0.083366	0	9157	0.08618	0	9157	0.085281	0	9157	0.085533	0	9157	0.084435	0	9157	0.084272	0	9157	0.085596	0	9157	0.082937	0
9162	0.083451	0	9162	0.086268	0	9162	0.085368	0	9162	0.08562	0	9162	0.084521	0	9162	0.084358	0	9162	0.085683	0	9162	0.083022	0
9167	0.083536	0	9167	0.086356	0	9167	0.085455	0	9167	0.085706	0	9167	0.084608	0	9167	0.084444	0	9167	0.085771	0	9167	0.083107	0
9172	0.083621	0	9172	0.086444	0	9172	0.085542	0	9172	0.085792	0	9172	0.084694	0	9172	0.084531	0	9172	0.085858	0	9172	0.083191	0
9177	0.083705	0	9177	0.086532	0	9177	0.085629	0	9177	0.085879	0	9177	0.08478	0	9177	0.084617	0	9177	0.085945	0	9177	0.083276	0
9182	0.08379	0	9182	0.08662	0	9182	0.085717	0	9182	0.085965	0	9182	0.084867	0	9182	0.084703	0	9182	0.086033	0	9182	0.083361	0
9187	0.083875	0	9187	0.086708	0	9187	0.085804	0	9187	0.086052	0	9187	0.084953	0	9187	0.08479	0	9187	0.08612	0	9187	0.083446	0
9192	0.08396	0	9192	0.086797	0	9192	0.085892	0	9192	0.086139	0	9192	0.08504	0	9192	0.084876	0	9192	0.086208	0	9192	0.083531	0
9197	0.084045	0	9197	0.086885	0	9197	0.085979	0	9197	0.086225	0	9197	0.085127	0	9197	0.084963	0	9197	0.086295	0	9197	0.083616	0
9202	0.08413	0	9202	0.086973	0	9202	0.086066	0	9202	0.086312	0	9202	0.085213	0	9202	0.085049	0	9202	0.086383	0	9202	0.083702	0
9207	0.084215	0	9207	0.087062	0	9207	0.086154	0	9207	0.086399	0	9207	0.0853	0	9207	0.085136	0	9207	0.086471	0	9207	0.083787	0
9212	0.084301	0	9212	0.08715	0	9212	0.086242	0	9212	0.086486	0	9212	0.085387	0	9212	0.085222	0	9212	0.086558	0	9212	0.083872	0
9217	0.084386	0	9217	0.087239	0	9217	0.086329	0	9217	0.086572	0	9217	0.085473	0	9217	0.085309	0	9217	0.086646	0	9217	0.083957	0
9222	0.084471	0	9222	0.087327	0	9222	0.086417	0	9222	0.086659	0	9222	0.08556	0	9222	0.085396	0	9222	0.086734	0	9222	0.084043	0
9227	0.084556	0	9227	0.087416	0	9227	0.086505	0	9227	0.086746	0	9227	0.085647	0	9227	0.085482	0	9227	0.086822	0	9227	0.084128	0
9232	0.084642	0	9232	0.087504	0	9232	0.086592	0	9232	0.086833	0	9232	0.085734	0	9232	0.085569	0	9232	0.08691	0	9232	0.084213	0
9237	0.084727	0	9237	0.087593	0	9237	0.08668	0	9237	0.08692	0	9237	0.085821	0	9237	0.085656	0	9237	0.086998	0	9237	0.084299	0
9242	0.084812	0	9242	0.087681	0	9242	0.086768	0	9242	0.087007	0	9242	0.085908	0	9242	0.085743	0	9242	0.087086	0	9242	0.084384	0
9247	0.084898	0	9247	0.08777	0	9247	0.086856	0	9247	0.087094	0	9247	0.085995	0	9247	0.08583	0	9247	0.087174	0	9247	0.08447	0
9252	0.084983	0	9252	0.087859	0	9252	0.086944	0	9252	0.087181	0	9252	0.086082	0	9252	0.085917	0	9252	0.087262	0	9252	0.084555	0
9257	0.085069	0	9257	0.087948	0	9257	0.087032	0	9257	0.087269	0	9257	0.086169	0	9257	0.086004	0	9257	0.08735	0	9257	0.084641	0
9262	0.085154	0	9262	0.088037	0	9262	0.08712	0	9262	0.087356	0	9262	0.086256	0	9262	0.086091	0	9262	0.087438	0	9262	0.084727	0
9267	0.08524	0	9267	0.088126	0	9267	0.087208	0	9267	0.087443	0	9267	0.086344	0	9267	0.086178	0	9267	0.087526	0	9267	0.084812	0
9272	0.085326	0	9272	0.088215	0	9272	0.087296	0	9272	0.087531	0	9272	0.086431	0	9272	0.086265	0	9272	0.087614	0	9272	0.084898	0
9277	0.085411	0	9277	0.088304	0	9277	0.087384	0	9277	0.087618	0	9277	0.086518	0	9277	0.086352	0	9277	0.087703	0	9277	0.084984	0
9282	0.085497	0	9282	0.088393	0	9282	0.087473	0	9282	0.087705	0	9282	0.086606	0	9282	0.08644	0	9282	0.087791	0	9282	0.08507	0
9287	0.085583	0	9287	0.088482	0	9287	0.087561	0	9287	0.087793	0	9287	0.086693	0	9287	0.086527	0	9287	0.087879	0	9287	0.085155	0
9292	0.085669	0	9292	0.088571	0	9292	0.087649	0	9292	0.08788	0	9292	0.08678	0	9292	0.086614	0	9292	0.087968	0	9292	0.085241	0
9297	0.085755	0	9297	0.08866	0	9297	0.087738	0	9297	0.087968	0	9297	0.086868	0	9297	0.086701	0	9297	0.088056	0	9297	0.085327	0
9302	0.085841	0	9302	0.088749	0	9302	0.087826	0	9302	0.088055	0	9302	0.086955	0	9302	0.086789	0	9302	0.088145	0	9302	0.085413	0
9307	0.085927	0	9307	0.088838	0	9307	0.087914	0	9307	0.088143	0	9307	0.087043	0	9307	0.086876	0	9307	0.088233	0	9307	0.085499	0
9312	0.086013	0	9312	0.088928	0	9312	0.088003	0	9312	0.088231	0	9312	0.087131	0	9312	0.086964	0	9312	0.088322	0	9312	0.085585	0
9317	0.086099	0	9317	0.089017	0	9317	0.088091	0	9317	0.088318	0	9317	0.087218	0	9317	0.087051	0	9317	0.088411	0	9317	0.085672	0
9322	0.086185	0	9322	0.089107	0	9322	0.08818	0	9322	0.088406	0	9322	0.087306	0	9322	0.087139	0	9322	0.088499	0	9322	0.085758	0
9327	0.086271	0	9327	0.089196	0	9327	0.088269	0	9327	0.088494	0	9327	0.087394	0	9327	0.087227	0	9327	0.088588	0	9327	0.085844	0
9332	0.086357	0	9332	0.089285	0	9332	0.088357	0	9332	0.088582	0	9332	0.087482	0	9332	0.087314	0	9332	0.088677	0	9332	0.08593	0
9337	0.086443	0	9337	0.089375	0	9337	0.088446	0	9337	0.08867	0	9337	0.087569	0	9337	0.087402	0	9337	0.088766	0	9337	0.086016	0
9342	0.086529	0	9342	0.089465	0	9342	0.088535	0	9342	0.088758	0	9342	0.087657	0	9342	0.08749	0	9342	0.088854	0	9342	0.086103	0
9347	0.086616	0	9347	0.089554	0	9347	0.088623	0	9347	0.088846	0	9347	0.087745	0	9347	0.087578	0	9347	0.088943	0	9347	0.086189	0
9352	0.086702	0	9352	0.089644	0	9352	0.088712	0	9352	0.088934	0	9352	0.087833	0	9352	0.087665	0	9352	0.089032	0	9352	0.086276	0
9357	0.086789	0	9357	0.089734	0	9357	0.088801	0	9357	0.089022	0	9357	0.087921	0	9357	0.087753	0	9357	0.089121	0	9357	0.086362	0
9362	0.086875	0	9362	0.089823	0	9362	0.08889	0	9362	0.08911	0	9362	0.088009	0	9362	0.087841	0	9362	0.08921	0	9362	0.086449	0
9367	0.086961	0	9367	0.089913	0	9367	0.088979	0	9367	0.089198	0	9367	0.088097	0	9367	0.087929	0	9367	0.089299	0	9367	0.086535	0
9372	0.087048	0	9372	0.090003	0	9372	0.089068	0	9372	0.089286	0	9372	0.088186	0	9372	0.088017	0	9372	0.089389	0	9372	0.086622	0
9377	0.087135	0	9377	0.090093	0	9377	0.089157	0	9377	0.089374	0	9377	0.088274	0	9377	0.088105	0	9377	0.089478	0	9377	0.086708	0
9382	0.087221	0	9382	0.090183	0	9382	0.089246	0	9382	0.089463	0	9382	0.088362	0	9382	0.088193	0	9382	0.089567	0	9382	0.086795	0
9387	0.087308	0	9387	0.090273	0	9387	0.089335	0	9387	0.089551	0	9387	0.08845	0	9387	0.088282	0	9387	0.089656	0	9387	0.086882	0
9392	0.087394	0	9392	0.090363	0	9392	0.089425	0	9392	0.089639	0	9392	0.088539	0	9392	0.08837	0	9392	0.089746	0	9392	0.086969	0
9397	0.087481	0	9397	0.090453	0	9397	0.089514	0	9397	0.089728	0	9397	0.088627	0	9397	0.088458	0	9397	0.089835	0	9397	0.087055	0
9402	0.087568	0	9402	0.090543	0	9402	0.089603	0	9402	0.089816	0	9402	0.088715	0	9402	0.088546	0	9402	0.089924	0	9402	0.087142	0
9407	0.087655	0	9407	0.090633	0	9407	0.089692	0	9407	0.089905	0	9407	0.088804	0	9407	0.088635	0	9407	0.090014	0	9407	0.087229	0
9412	0.087742	0	9412	0.090723	0	9412	0.089782	0	9412	0.089993	0	9412	0.088892	0	9412	0.088723	0	9412	0.090103	0	9412	0.087316	0
9417	0.087829	0	9417	0.090814	0	9417	0.089871	0	9417	0.090082	0	9417	0.088981	0	9417	0.088811	0	9417	0.090193	0	9417	0.087403	0
9422	0.087916	0	9422	0.090904	0	9422	0.089961	0	9422	0.09017	0	9422	0.089069	0	9422	0.0889	0	9422	0.090282	0	9422	0.08749	0
9427	0.088003	0	9427	0.090994	0	9427	0.09005	0	9427	0.090259	0	9427	0.089158	0	9427	0.088988	0	9427	0.090372	0	9427	0.087577	0
9432	0.08809	0	9432	0.091085	0	9432	0.09014	0	9432	0.090348	0	9432	0.089247	0	9432	0.089077	0	9432	0.090462	0	9432	0.087664	0
9437	0.088177	0	9437	0.091175	0	9437	0.090229	0	9437	0.090437	0	9437	0.089335	0	9437	0.089165	0	9437	0.090551	0	9437	0.087752	0
9442	0.088264	0	9442	0.091266	0	9442	0.090319	0	9442	0.090525	0	9442	0.089424	0	9442	0.089254	0	9442	0.090641	0	9442	0.087839	0
9447	0.088351	0	9447	0.091356	0	9447	0.090409	0	9447	0.090614	0	9447	0.089513	0	9447	0.089343	0	9447	0.090731	0	9447	0.087926	0
9452	0.088438	0	9452	0.091447	0	9452	0.090498	0	9452	0.090703	0	9452	0.089602	0	9452	0.089431	0	9452	0.090821	0	9452	0.088013	0
9457	0.088525	0	9457	0.091537	0	9457	0.090588	0	9457	0.090792	0	9457	0.089691	0	9457	0.08952	0	9457	0.090911	0	9457	0.088101	0
9462	0.088613	0	9462	0.091628	0	9462	0.090678	0	9462	0.090881	0	9462	0.08978	0	9462	0.089609	0	9462	0.091001	0	9462	0.088188	0
9467	0.0887	0	9467	0.091719	0	9467	0.090768	0	9467	0.09097	0	9467	0.089869	0	9467	0.089698	0	9467	0.091091	0	9467	0.088275	0
9472	0.088787	0	9472	0.091809	0	9472	0.090858	0	9472	0.091059	0	9472	0.089958	0	9472	0.089787	0	9472	0.091181	0	9472	0.088363	0
9477	0.088875	0	9477	0.0919	0	9477	0.090948	0	9477	0.091148	0	9477	0.090047	0	9477	0.089876	0	9477	0.091271	0	9477	0.08845	0
9482	0.088962	0	9482	0.091991	0	9482	0.091038	0	9482	0.091237	0	9482	0.090136	0	9482	0.089965	0	9482	0.091361	0	9482	0.088538	0
9487	0.08905	0	9487	0.092082	0	9487	0.091128	0	9487	0.091327	0	9487	0.090225	0	9487	0.090054	0	9487	0.091451	0	9487	0.088626	0
9492	0.089137	0	9492	0.092173	0	9492	0.091218	0	9492	0.091416	0	9492	0.090314	0	9492	0.090143	0	9492	0.091541	0	9492	0.088713	0
9497	0.089225	0	9497	0.092264	0	9497	0.091308	0	9497	0.091505	0	9497	0.090404	0	9497	0.090232	0	9497	0.091631	0	9497	0.088801	0
9502	0.089313	0	9502	0.092355	0	9502	0.091398	0	9502	0.091594	0	9502	0.090493	0	9502	0.090321	0	9502	0.091722	0	9502	0.088889	0
9507	0.0894	0	9507	0.092446	0	9507	0.091488	0	9507	0.091684	0	9507	0.090582	0	9507	0.09041	0	9507	0.091812	0	9507	0.088976	0
9512	0.089488	0	9512	0.092537	0	9512	0.091579	0	9512	0.091773	0	9512	0.090672	0	9512	0.0905	0	9512	0.091902	0	9512	0.089064	0
9517	0.089576	0	9517	0.092628	0	9517	0.091669	0	9517	0.091863	0	9517	0.090761	0	9517	0.090589	0	9517	0.091993	0	9517	0.089152	0
9522	0.089664	0	9522	0.092719	0	9522	0.091759	0	9522	0.091952	0	9522	0.09085	0	9522	0.090678	0	9522	0.092083	0	9522	0.08924	0
9527	0.089751	0	9527	0.092811	0	9527	0.09185	0	9527	0.092042	0	9527	0.09094	0	9527	0.090768	0	9527	0.092174	0	9527	0.089328	0
9532	0.089839	0	9532	0.092902	0	9532	0.09194	0	9532	0.092131	0	9532	0.09103	0	9532	0.090857	0	9532	0.092264	0	9532	0.089416	0
9537	0.089927	0	9537	0.092993	0	9537	0.092031	0	9537	0.092221	0	9537	0.091119	0	9537	0.090947	0	9537	0.092355	0	9537	0.089504	0
9542	0.090015	0	9542	0.093085	0	9542	0.092121	0	9542	0.092311	0	9542	0.091209	0	9542	0.091036	0	9542	0.092446	0	9542	0.089592	0
9547	0.090103	0	9547	0.093176	0	9547	0.092212	0	9547	0.0924	0	9547	0.091299	0	9547	0.091126	0	9547	0.092536	0	9547	0.08968	0
9552	0.090191	0	9552	0.093267	0	9552	0.092302	0	9552	0.09249	0	9552	0.091388	0	9552	0.091215	0	9552	0.092627	0	9552	0.089768	0
9557	0.090279	0	9557	0.093359	0	9557	0.092393	0	9557	0.09258	0	9557	0.091478	0	9557	0.091305	0	9557	0.092718	0	9557	0.089857	0
9562	0.090368	0	9562	0.093451	0	9562	0.092484	0	9562	0.09267	0	9562	0.091568	0	9562	0.091395	0	9562	0.092809	0	9562	0.089945	0
9567	0.090456	0	9567	0.093542	0	9567	0.092575	0	9567	0.09276	0	9567	0.091658	0	9567	0.091484	0	9567	0.092899	0	9567	0.090033	0
9572	0.090544	0	9572	0.093634	0	9572	0.092665	0	9572	0.09285	0	9572	0.091748	0	9572	0.091574	0	9572	0.09299	0	9572	0.090121	0
9577	0.090632	0	9577	0.093725	0	9577	0.092756	0	9577	0.09294	0	9577	0.091838	0	9577	0.091664	0	9577	0.093081	0	9577	0.09021	0
9582	0.090721	0	9582	0.093817	0	9582	0.092847	0	9582	0.09303	0	9582	0.091928	0	9582	0.091754	0	9582	0.093172	0	9582	0.090298	0
9587	0.090809	0	9587	0.093909	0	9587	0.092938	0	9587	0.09312	0	9587	0.092018	0	9587	0.091844	0	9587	0.093263	0	9587	0.090387	0
9592	0.090897	0	9592	0.094001	0	9592	0.093029	0	9592	0.09321	0	9592	0.092108	0	9592	0.091934	0	9592	0.093354	0	9592	0.090475	0
9597	0.090986	0	9597	0.094093	0	9597	0.09312	0	9597	0.0933	0	9597	0.092198	0	9597	0.092024	0	9597	0.093446	0	9597	0.090564	0
9602	0.091074	0	9602	0.094185	0	9602	0.093211	0	9602	0.09339	0	9602	0.092288	0	9602	0.092114	0	9602	0.093537	0	9602	0.090652	0
9607	0.091163	0	9607	0.094277	0	9607	0.093302	0	9607	0.09348	0	9607	0.092378	0	9607	0.092204	0	9607	0.093628	0	9607	0.090741	0
9612	0.091252	0	9612	0.094369	0	9612	0.093393	0	9612	0.093571	0	9612	0.092469	0	9612	0.092294	0	9612	0.093719	0	9612	0.09083	0
9617	0.09134	0	9617	0.094461	0	9617	0.093485	0	9617	0.093661	0	9617	0.092559	0	9617	0.092384	0	9617	0.093811	0	9617	0.090918	0
9622	0.091429	0	9622	0.094553	0	9622	0.093576	0	9622	0.093751	0	9622	0.092649	0	9622	0.092474	0	9622	0.093902	0	9622	0.091007	0
9627	0.091518	0	9627	0.094645	0	9627	0.093667	0	9627	0.093842	0	9627	0.09274	0	9627	0.092565	0	9627	0.093993	0	9627	0.091096	0
9632	0.091606	0	9632	0.094737	0	9632	0.093758	0	9632	0.093932	0	9632	0.09283	0	9632	0.092655	0	9632	0.094085	0	9632	0.091185	0
9637	0.091695	0	9637	0.094829	0	9637	0.09385	0	9637	0.094023	0	9637	0.09292	0	9637	0.092745	0	9637	0.094176	0	9637	0.091274	0
9642	0.091784	0	9642	0.094922	0	9642	0.093941	0	9642	0.094113	0	9642	0.093011	0	9642	0.092836	0	9642	0.094268	0	9642	0.091363	0
9647	0.091873	0	9647	0.095014	0	9647	0.094033	0	9647	0.094204	0	9647	0.093102	0	9647	0.092926	0	9647	0.094359	0	9647	0.091452	0
9652	0.091962	0	9652	0.095106	0	9652	0.094124	0	9652	0.094294	0	9652	0.093192	0	9652	0.093017	0	9652	0.094451	0	9652	0.091541	0
9657	0.092051	0	9657	0.095199	0	9657	0.094216	0	9657	0.094385	0	9657	0.093283	0	9657	0.093107	0	9657	0.094543	0	9657	0.09163	0
9662	0.09214	0	9662	0.095291	0	9662	0.094307	0	9662	0.094476	0	9662	0.093374	0	9662	0.093198	0	9662	0.094634	0	9662	0.091719	0
9667	0.092229	0	9667	0.095384	0	9667	0.094399	0	9667	0.094567	0	9667	0.093464	0	9667	0.093288	0	9667	0.094726	0	9667	0.091808	0
9672	0.092318	0	9672	0.095476	0	9672	0.094491	0	9672	0.094657	0	9672	0.093555	0	9672	0.093379	0	9672	0.094818	0	9672	0.091897	0
9677	0.092407	0	9677	0.095569	0	9677	0.094582	0	9677	0.094748	0	9677	0.093646	0	9677	0.09347	0	9677	0.09491	0	9677	0.091986	0
9682	0.092496	0	9682	0.095661	0	9682	0.094674	0	9682	0.094839	0	9682	0.093737	0	9682	0.09356	0	9682	0.095002	0	9682	0.092076	0
9687	0.092586	0	9687	0.095754	0	9687	0.094766	0	9687	0.09493	0	9687	0.093828	0	9687	0.093651	0	9687	0.095094	0	9687	0.092165	0
9692	0.092675	0	9692	0.095847	0	9692	0.094858	0	9692	0.095021	0	9692	0.093919	0	9692	0.093742	0	9692	0.095186	0	9692	0.092254	0
9697	0.092764	0	9697	0.095939	0	9697	0.09495	0	9697	0.095112	0	9697	0.09401	0	9697	0.093833	0	9697	0.095278	0	9697	0.092344	0
9702	0.092853	0	9702	0.096032	0	9702	0.095042	0	9702	0.095203	0	9702	0.094101	0	9702	0.093924	0	9702	0.09537	0	9702	0.092433	0
9707	0.092943	0	9707	0.096125	0	9707	0.095134	0	9707	0.095294	0	9707	0.094192	0	9707	0.094015	0	9707	0.095462	0	9707	0.092523	0
9712	0.093032	0	9712	0.096218	0	9712	0.095226	0	9712	0.095385	0	9712	0.094283	0	9712	0.094106	0	9712	0.095554	0	9712	0.092612	0
9717	0.093122	0	9717	0.096311	0	9717	0.095318	0	9717	0.095477	0	9717	0.094374	0	9717	0.094197	0	9717	0.095646	0	9717	0.092702	0
9722	0.093211	0	9722	0.096404	0	9722	0.09541	0	9722	0.095568	0	9722	0.094465	0	9722	0.094288	0	9722	0.095738	0	9722	0.092792	0
9727	0.093301	0	9727	0.096497	0	9727	0.095502	0	9727	0.095659	0	9727	0.094557	0	9727	0.094379	0	9727	0.095831	0	9727	0.092881	0
9732	0.093391	0	9732	0.09659	0	9732	0.095594	0	9732	0.09575	0	9732	0.094648	0	9732	0.09447	0	9732	0.095923	0	9732	0.092971	0
9737	0.09348	0	9737	0.096683	0	9737	0.095687	0	9737	0.095842	0	9737	0.094739	0	9737	0.094562	0	9737	0.096015	0	9737	0.093061	0
9742	0.09357	0	9742	0.096776	0	9742	0.095779	0	9742	0.095933	0	9742	0.094831	0	9742	0.094653	0	9742	0.096108	0	9742	0.093151	0
9747	0.09366	0	9747	0.09687	0	9747	0.095871	0	9747	0.096025	0	9747	0.094922	0	9747	0.094744	0	9747	0.0962	0	9747	0.09324	0
9752	0.093749	0	9752	0.096963	0	9752	0.095964	0	9752	0.096116	0	9752	0.095014	0	9752	0.094836	0	9752	0.096293	0	9752	0.09333	0
9757	0.093839	0	9757	0.097056	0	9757	0.096056	0	9757	0.096208	0	9757	0.095105	0	9757	0.094927	0	9757	0.096385	0	9757	0.09342	0
9762	0.093929	0	9762	0.09715	0	9762	0.096149	0	9762	0.096299	0	9762	0.095197	0	9762	0.095018	0	9762	0.096478	0	9762	0.09351	0
9767	0.094019	0	9767	0.097243	0	9767	0.096241	0	9767	0.096391	0	9767	0.095289	0	9767	0.09511	0	9767	0.096571	0	9767	0.0936	0
9772	0.094109	0	9772	0.097336	0	9772	0.096334	0	9772	0.096483	0	9772	0.09538	0	9772	0.095201	0	9772	0.096663	0	9772	0.09369	0
9777	0.094199	0	9777	0.09743	0	9777	0.096426	0	9777	0.096574	0	9777	0.095472	0	9777	0.095293	0	9777	0.096756	0	9777	0.09378	0
9782	0.094289	0	9782	0.097523	0	9782	0.096519	0	9782	0.096666	0	9782	0.095564	0	9782	0.095385	0	9782	0.096849	0	9782	0.093871	0
9787	0.094379	0	9787	0.097617	0	9787	0.096612	0	9787	0.096758	0	9787	0.095656	0	9787	0.095476	0	9787	0.096942	0	9787	0.093961	0
9792	0.094469	0	9792	0.097711	0	9792	0.096704	0	9792	0.09685	0	9792	0.095747	0	9792	0.095568	0	9792	0.097034	0	9792	0.094051	0
9797	0.09456	0	9797	0.097804	0	9797	0.096797	0	9797	0.096942	0	9797	0.095839	0	9797	0.09566	0	9797	0.097127	0	9797	0.094141	0
9802	0.09465	0	9802	0.097898	0	9802	0.09689	0	9802	0.097034	0	9802	0.095931	0	9802	0.095752	0	9802	0.09722	0	9802	0.094232	0
9807	0.09474	0	9807	0.097992	0	9807	0.096983	0	9807	0.097126	0	9807	0.096023	0	9807	0.095844	0	9807	0.097313	0	9807	0.094322	0
9812	0.09483	0	9812	0.098085	0	9812	0.097076	0	9812	0.097218	0	9812	0.096115	0	9812	0.095935	0	9812	0.097406	0	9812	0.094412	0
9817	0.094921	0	9817	0.098179	0	9817	0.097169	0	9817	0.09731	0	9817	0.096207	0	9817	0.096027	0	9817	0.097499	0	9817	0.094503	0
9822	0.095011	0	9822	0.098273	0	9822	0.097262	0	9822	0.097402	0	9822	0.096299	0	9822	0.096119	0	9822	0.097593	0	9822	0.094593	0
9827	0.095101	0	9827	0.098367	0	9827	0.097355	0	9827	0.097494	0	9827	0.096392	0	9827	0.096211	0	9827	0.097686	0	9827	0.094684	0
9832	0.095192	0	9832	0.098461	0	9832	0.097448	0	9832	0.097586	0	9832	0.096484	0	9832	0.096303	0	9832	0.097779	0	9832	0.094775	0
9837	0.095282	0	9837	0.098555	0	9837	0.097541	0	9837	0.097678	0	9837	0.096576	0	9837	0.096396	0	9837	0.097872	0	9837	0.094865	0
9842	0.095373	0	9842	0.098649	0	9842	0.097635	0	9842	0.097771	0	9842	0.096668	0	9842	0.096488	0	9842	0.097966	0	9842	0.094956	0
9847	0.095464	0	9847	0.098743	0	9847	0.097728	0	9847	0.097863	0	9847	0.096761	0	9847	0.09658	0	9847	0.098059	0	9847	0.095047	0
9852	0.095554	0	9852	0.098837	0	9852	0.097821	0	9852	0.097955	0	9852	0.096853	0	9852	0.096672	0	9852	0.098152	0	9852	0.095137	0
9857	0.095645	0	9857	0.098932	0	9857	0.097914	0	9857	0.098048	0	9857	0.096945	0	9857	0.096764	0	9857	0.098246	0	9857	0.095228	0
9862	0.095736	0	9862	0.099026	0	9862	0.098008	0	9862	0.09814	0	9862	0.097038	0	9862	0.096857	0	9862	0.098339	0	9862	0.095319	0
9867	0.095827	0	9867	0.09912	0	9867	0.098101	0	9867	0.098233	0	9867	0.09713	0	9867	0.096949	0	9867	0.098433	0	9867	0.09541	0
9872	0.095917	0	9872	0.099215	0	9872	0.098195	0	9872	0.098325	0	9872	0.097223	0	9872	0.097042	0	9872	0.098526	0	9872	0.095501	0
9877	0.096008	0	9877	0.099309	0	9877	0.098288	0	9877	0.098418	0	9877	0.097316	0	9877	0.097134	0	9877	0.09862	0	9877	0.095592	0
9882	0.096099	0	9882	0.099403	0	9882	0.098382	0	9882	0.098511	0	9882	0.097408	0	9882	0.097227	0	9882	0.098714	0	9882	0.095683	0
9887	0.09619	0	9887	0.099498	0	9887	0.098475	0	9887	0.098603	0	9887	0.097501	0	9887	0.097319	0	9887	0.098807	0	9887	0.095774	0
9892	0.096281	0	9892	0.099592	0	9892	0.098569	0	9892	0.098696	0	9892	0.097594	0	9892	0.097412	0	9892	0.098901	0	9892	0.095865	0
9897	0.096372	0	9897	0.099687	0	9897	0.098663	0	9897	0.098789	0	9897	0.097686	0	9897	0.097504	0	9897	0.098995	0	9897	0.095956	0
9902	0.096463	0	9902	0.099782	0	9902	0.098756	0	9902	0.098882	0	9902	0.097779	0	9902	0.097597	0	9902	0.099089	0	9902	0.096047	0
9907	0.096554	0	9907	0.099876	0	9907	0.09885	0	9907	0.098975	0	9907	0.097872	0	9907	0.09769	0	9907	0.099183	0	9907	0.096139	0
9912	0.096645	0	9912	0.099971	0	9912	0.098944	0	9912	0.099067	0	9912	0.097965	0	9912	0.097783	0	9912	0.099277	0	9912	0.09623	0
9917	0.096737	0	9917	0.100066	0	9917	0.099038	0	9917	0.09916	0	9917	0.098058	0	9917	0.097875	0	9917	0.099371	0	9917	0.096321	0
9922	0.096828	0	9922	0.10016	0	9922	0.099132	0	9922	0.099253	0	9922	0.098151	0	9922	0.097968	0	9922	0.099465	0	9922	0.096412	0
9927	0.096919	0	9927	0.100255	0	9927	0.099226	0	9927	0.099346	0	9927	0.098244	0	9927	0.098061	0	9927	0.099559	0	9927	0.096504	0
9932	0.097011	0	9932	0.10035	0	9932	0.09932	0	9932	0.099439	0	9932	0.098337	0	9932	0.098154	0	9932	0.099653	0	9932	0.096595	0
9937	0.097102	0	9937	0.100445	0	9937	0.099414	0	9937	0.099533	0	9937	0.09843	0	9937	0.098247	0	9937	0.099747	0	9937	0.096687	0
9942	0.097193	0	9942	0.10054	0	9942	0.099508	0	9942	0.099626	0	9942	0.098523	0	9942	0.09834	0	9942	0.099841	0	9942	0.096778	0
9947	0.097285	0	9947	0.100635	0	9947	0.099602	0	9947	0.099719	0	9947	0.098617	0	9947	0.098433	0	9947	0.099935	0	9947	0.09687	0
9952	0.097376	0	9952	0.10073	0	9952	0.099696	0	9952	0.099812	0	9952	0.09871	0	9952	0.098526	0	9952	0.10003	0	9952	0.096962	0
9957	0.097468	0	9957	0.100825	0	9957	0.09979	0	9957	0.099905	0	9957	0.098803	0	9957	0.09862	0	9957	0.100124	0	9957	0.097053	0
9962	0.09756	0	9962	0.10092	0	9962	0.099885	0	9962	0.099999	0	9962	0.098897	0	9962	0.098713	0	9962	0.100218	0	9962	0.097145	0
9967	0.097651	0	9967	0.101015	0	9967	0.099979	0	9967	0.100092	0	9967	0.09899	0	9967	0.098806	0	9967	0.100313	0	9967	0.097237	0
9972	0.097743	0	9972	0.101111	0	9972	0.100073	0	9972	0.100186	0	9972	0.099083	0	9972	0.098899	0	9972	0.100407	0	9972	0.097329	0
9977	0.097835	0	9977	0.101206	0	9977	0.100168	0	9977	0.100279	0	9977	0.099177	0	9977	0.098993	0	9977	0.100502	0	9977	0.09742	0
9982	0.097926	0	9982	0.101301	0	9982	0.100262	0	9982	0.100373	0	9982	0.09927	0	9982	0.099086	0	9982	0.100596	0	9982	0.097512	0
9987	0.098018	0	9987	0.101397	0	9987	0.100357	0	9987	0.100466	0	9987	0.099364	0	9987	0.099179	0	9987	0.100691	0	9987	0.097604	0
[truncated: 94,297 more rows]
