# Supplementary material for: Elaborate plumage patterning in a Cretaceous bird
Source: PeerJ. 2018 Nov 2;6:e5831. doi: 10.7717/peerj.5831 (PMC6216952; doi:10.7717/peerj.5831)
Supplement: Supplemental Information 4 — Each column is a Maldi-ToF reading from an extant or fossil melanin sample. [file peerj-06-5831-s004.xlsx]

## Sheet: Sheet1
Confu Sample A1		Confu Sample B1		Confu Sample D1		Confu Sample E1		Confu Sample F1		Confu Sample K1		Confu Sample T		Confu Sample U		Confu Sample V		Confu Sample W		Confu Sample Y		Confu Sample Z		PARA Test Fossil		Sepia Melanin		Red-winged Blackbird Melanin		Platanus Fossil		Stigmaria Fossil		Coal		Graphite		Carbon Black
m/z	Intensity	m/z	Intensity	m/z	Intensity	m/z	Intensity	m/z	Intensity	m/z	Intensity	m/z	Intensity	m/z	Intensity	m/z	Intensity	m/z	Intensity	m/z	Intensity	m/z	Intensity	m/z	Intensity	m/z	Intensity	m/z	Intensity	m/z	Intensity	m/z	Intensity	m/z	Intensity	m/z	Intensity	m/z	Intensity
119.997	1	119.997	2	119.997	28	119.997	23	119.997	3	119.997	0	119.997	0	119.997	8	119.997	0	119.997	0	119.997	5	119.997	11	100.544	224	160.006	0	100.544	11	100.544	55	100.006	7	100.006	26	100.006	37	100.006	0
120.004	0	120.004	3	120.004	7	120.004	15	120.004	1	120.004	0	120.004	0	120.004	7	120.004	0	120.004	1	120.004	0	120.004	1	100.55	160	160.014	0	100.55	28	100.55	37	100.012	3	100.012	28	100.012	27	100.012	0
120.012	3	120.012	4	120.012	10	120.012	9	120.012	0	120.012	0	120.012	0	120.012	3	120.012	0	120.012	5	120.012	1	120.012	0	100.557	135	160.023	0	100.557	36	100.557	45	100.019	0	100.019	19	100.019	53	100.019	0
120.019	0	120.019	4	120.019	8	120.019	9	120.019	0	120.019	0	120.019	0	120.019	6	120.019	0	120.019	13	120.019	1	120.019	10	100.563	105	160.031	0	100.563	31	100.563	69	100.025	0	100.025	13	100.025	62	100.025	0
120.026	1	120.026	0	120.026	3	120.026	9	120.026	0	120.026	0	120.026	0	120.026	3	120.026	0	120.026	0	120.026	0	120.026	10	100.57	105	160.039	0	100.57	19	100.57	66	100.032	5	100.032	15	100.032	34	100.032	0
120.033	2	120.033	0	120.033	3	120.033	0	120.033	0	120.033	0	120.033	0	120.033	3	120.033	0	120.033	0	120.033	3	120.033	2	100.576	119	160.047	0	100.576	7	100.576	38	100.038	5	100.038	10	100.038	26	100.038	0
120.04	0	120.04	0	120.04	5	120.04	3	120.04	0	120.04	0	120.04	0	120.04	0	120.04	0	120.04	0	120.04	8	120.04	3	100.583	86	160.055	0	100.583	13	100.583	70	100.044	1	100.044	13	100.044	21	100.044	0
120.047	0	120.047	0	120.047	0	120.047	0	120.047	0	120.047	0	120.047	0	120.047	5	120.047	0	120.047	0	120.047	10	120.047	5	100.589	175	160.063	0	100.589	8	100.589	144	100.051	13	100.051	57	100.051	33	100.051	0
120.054	2	120.054	0	120.054	11	120.054	0	120.054	0	120.054	0	120.054	0	120.054	8	120.054	0	120.054	0	120.054	3	120.054	4	100.596	114	160.071	16	100.596	22	100.596	333	100.057	4	100.057	67	100.057	38	100.057	1
120.061	0	120.061	3	120.061	4	120.061	4	120.061	0	120.061	3	120.061	5	120.061	4	120.061	0	120.061	0	120.061	7	120.061	5	100.602	103	160.079	6	100.602	34	100.602	647	100.064	0	100.064	54	100.064	35	100.064	0
120.068	2	120.068	0	120.068	3	120.068	5	120.068	0	120.068	2	120.068	0	120.068	5	120.068	0	120.068	0	120.068	3	120.068	9	100.609	115	160.087	2	100.609	27	100.609	795	100.07	0	100.07	33	100.07	29	100.07	0
120.075	1	120.075	3	120.075	4	120.075	1	120.075	0	120.075	0	120.075	0	120.075	2	120.075	0	120.075	0	120.075	0	120.075	4	100.615	99	160.096	2	100.615	61	100.615	762	100.076	17	100.076	12	100.076	62	100.076	0
120.082	0	120.082	3	120.082	0	120.082	0	120.082	0	120.082	0	120.082	0	120.082	1	120.082	0	120.082	0	120.082	0	120.082	2	100.622	71	160.104	0	100.622	86	100.622	728	100.083	8	100.083	2	100.083	77	100.083	5
120.089	0	120.089	1	120.089	0	120.089	1	120.089	0	120.089	0	120.089	0	120.089	0	120.089	0	120.089	0	120.089	5	120.089	0	100.628	59	160.112	0	100.628	83	100.628	547	100.089	1	100.089	18	100.089	54	100.089	5
120.096	0	120.096	0	120.096	0	120.096	3	120.096	0	120.096	0	120.096	0	120.096	0	120.096	0	120.096	0	120.096	11	120.096	1	100.634	73	160.12	0	100.634	36	100.634	534	100.096	0	100.096	33	100.096	61	100.096	0
120.103	0	120.103	3	120.103	2	120.103	1	120.103	0	120.103	0	120.103	0	120.103	0	120.103	0	120.103	0	120.103	14	120.103	1	100.641	90	160.128	0	100.641	44	100.641	436	100.102	0	100.102	47	100.102	59	100.102	0
120.11	0	120.11	4	120.11	0	120.11	0	120.11	0	120.11	0	120.11	0	120.11	9	120.11	0	120.11	0	120.11	2	120.11	0	100.647	81	160.136	0	100.647	31	100.647	422	100.109	0	100.109	18	100.109	46	100.109	0
120.117	0	120.117	0	120.117	0	120.117	4	120.117	0	120.117	0	120.117	0	120.117	5	120.117	0	120.117	0	120.117	1	120.117	1	100.654	65	160.144	0	100.654	22	100.654	267	100.115	5	100.115	32	100.115	33	100.115	1
120.124	1	120.124	4	120.124	0	120.124	1	120.124	0	120.124	0	120.124	0	120.124	7	120.124	0	120.124	0	120.124	8	120.124	2	100.66	77	160.152	0	100.66	22	100.66	164	100.121	14	100.121	29	100.121	47	100.121	3
120.131	0	120.131	6	120.131	0	120.131	0	120.131	0	120.131	0	120.131	0	120.131	10	120.131	0	120.131	0	120.131	14	120.131	3	100.667	78	160.161	10	100.667	46	100.667	157	100.128	2	100.128	26	100.128	42	100.128	21
120.138	0	120.138	0	120.138	0	120.138	0	120.138	0	120.138	0	120.138	0	120.138	1	120.138	0	120.138	0	120.138	2	120.138	2	100.673	101	160.169	13	100.673	60	100.673	120	100.134	9	100.134	52	100.134	25	100.134	33
120.146	0	120.146	0	120.146	5	120.146	1	120.146	0	120.146	0	120.146	0	120.146	4	120.146	0	120.146	0	120.146	0	120.146	2	100.68	81	160.177	3	100.68	73	100.68	89	100.141	8	100.141	36	100.141	21	100.141	24
120.153	0	120.153	0	120.153	0	120.153	0	120.153	0	120.153	0	120.153	0	120.153	3	120.153	0	120.153	0	120.153	2	120.153	5	100.686	101	160.185	0	100.686	46	100.686	130	100.147	1	100.147	9	100.147	65	100.147	14
120.16	0	120.16	5	120.16	0	120.16	1	120.16	0	120.16	0	120.16	0	120.16	2	120.16	0	120.16	0	120.16	1	120.16	1	100.693	94	160.193	0	100.693	65	100.693	74	100.153	14	100.153	1	100.153	73	100.153	3
120.167	0	120.167	1	120.167	1	120.167	7	120.167	0	120.167	0	120.167	0	120.167	0	120.167	0	120.167	0	120.167	2	120.167	0	100.699	46	160.201	1	100.699	159	100.699	29	100.16	26	100.16	12	100.16	34	100.16	1
120.174	1	120.174	0	120.174	1	120.174	1	120.174	0	120.174	0	120.174	0	120.174	1	120.174	0	120.174	0	120.174	4	120.174	5	100.706	47	160.209	2	100.706	266	100.706	34	100.166	24	100.166	15	100.166	22	100.166	7
120.181	0	120.181	0	120.181	2	120.181	0	120.181	0	120.181	0	120.181	0	120.181	3	120.181	0	120.181	0	120.181	1	120.181	3	100.712	41	160.217	0	100.712	258	100.712	43	100.173	12	100.173	12	100.173	40	100.173	21
120.188	0	120.188	0	120.188	0	120.188	0	120.188	0	120.188	1	120.188	0	120.188	13	120.188	0	120.188	0	120.188	3	120.188	17	100.719	48	160.225	0	100.719	272	100.719	32	100.179	2	100.179	6	100.179	57	100.179	12
120.195	0	120.195	0	120.195	0	120.195	0	120.195	0	120.195	0	120.195	0	120.195	11	120.195	0	120.195	0	120.195	6	120.195	2	100.725	104	160.234	14	100.725	199	100.725	22	100.186	11	100.186	7	100.186	27	100.186	3
120.202	0	120.202	0	120.202	1	120.202	3	120.202	0	120.202	0	120.202	0	120.202	12	120.202	0	120.202	0	120.202	1	120.202	4	100.732	110	160.242	22	100.732	138	100.732	8	100.192	10	100.192	0	100.192	54	100.192	2
120.209	0	120.209	2	120.209	1	120.209	0	120.209	0	120.209	0	120.209	0	120.209	7	120.209	0	120.209	0	120.209	0	120.209	9	100.738	139	160.25	24	100.738	139	100.738	16	100.198	21	100.198	21	100.198	74	100.198	0
120.216	0	120.216	0	120.216	2	120.216	3	120.216	0	120.216	0	120.216	0	120.216	1	120.216	0	120.216	0	120.216	2	120.216	5	100.744	109	160.258	29	100.744	145	100.744	11	100.205	10	100.205	27	100.205	43	100.205	0
120.223	0	120.223	0	120.223	3	120.223	6	120.223	0	120.223	0	120.223	0	120.223	0	120.223	4	120.223	0	120.223	3	120.223	19	100.751	107	160.266	30	100.751	167	100.751	10	100.211	4	100.211	31	100.211	33	100.211	0
120.23	0	120.23	0	120.23	0	120.23	4	120.23	0	120.23	0	120.23	0	120.23	1	120.23	0	120.23	0	120.23	1	120.23	12	100.757	95	160.274	20	100.757	208	100.757	68	100.218	0	100.218	30	100.218	41	100.218	0
120.237	0	120.237	4	120.237	1	120.237	1	120.237	0	120.237	0	120.237	0	120.237	5	120.237	0	120.237	0	120.237	6	120.237	2	100.764	111	160.282	37	100.764	250	100.764	61	100.224	7	100.224	47	100.224	50	100.224	0
120.244	0	120.244	1	120.244	5	120.244	0	120.244	0	120.244	0	120.244	0	120.244	5	120.244	0	120.244	0	120.244	4	120.244	4	100.77	118	160.29	16	100.77	263	100.77	25	100.23	2	100.23	13	100.23	32	100.23	0
120.251	0	120.251	0	120.251	4	120.251	1	120.251	0	120.251	0	120.251	0	120.251	0	120.251	0	120.251	0	120.251	1	120.251	15	100.777	78	160.299	16	100.777	136	100.777	20	100.237	0	100.237	8	100.237	54	100.237	0
120.258	0	120.258	2	120.258	6	120.258	3	120.258	0	120.258	0	120.258	0	120.258	1	120.258	0	120.258	0	120.258	7	120.258	4	100.783	69	160.307	46	100.783	74	100.783	19	100.243	0	100.243	21	100.243	51	100.243	4
120.265	0	120.265	0	120.265	5	120.265	8	120.265	0	120.265	3	120.265	0	120.265	12	120.265	0	120.265	0	120.265	2	120.265	8	100.79	57	160.315	50	100.79	52	100.79	13	100.25	0	100.25	16	100.25	33	100.25	17
120.273	0	120.273	0	120.273	10	120.273	11	120.273	0	120.273	1	120.273	0	120.273	3	120.273	0	120.273	0	120.273	0	120.273	7	100.796	98	160.323	89	100.796	54	100.796	17	100.256	0	100.256	21	100.256	28	100.256	7
120.28	0	120.28	0	120.28	1	120.28	5	120.28	0	120.28	0	120.28	0	120.28	2	120.28	0	120.28	0	120.28	3	120.28	8	100.803	92	160.331	33	100.803	37	100.803	11	100.263	0	100.263	35	100.263	27	100.263	26
120.287	0	120.287	0	120.287	0	120.287	6	120.287	0	120.287	0	120.287	0	120.287	3	120.287	0	120.287	0	120.287	5	120.287	5	100.809	70	160.339	18	100.809	28	100.809	12	100.269	0	100.269	27	100.269	21	100.269	21
120.294	0	120.294	1	120.294	0	120.294	0	120.294	0	120.294	0	120.294	0	120.294	4	120.294	0	120.294	0	120.294	0	120.294	4	100.816	114	160.347	65	100.816	20	100.816	41	100.275	2	100.275	17	100.275	21	100.275	17
120.301	0	120.301	0	120.301	3	120.301	3	120.301	0	120.301	0	120.301	0	120.301	0	120.301	0	120.301	0	120.301	0	120.301	11	100.822	157	160.355	29	100.822	49	100.822	21	100.282	0	100.282	23	100.282	21	100.282	7
120.308	0	120.308	0	120.308	4	120.308	3	120.308	0	120.308	0	120.308	0	120.308	0	120.308	0	120.308	0	120.308	4	120.308	10	100.829	107	160.364	11	100.829	23	100.829	24	100.288	23	100.288	14	100.288	52	100.288	0
120.315	2	120.315	0	120.315	2	120.315	0	120.315	0	120.315	0	120.315	0	120.315	1	120.315	0	120.315	0	120.315	1	120.315	4	100.835	74	160.372	22	100.835	17	100.835	23	100.295	41	100.295	3	100.295	34	100.295	0
120.322	0	120.322	1	120.322	4	120.322	5	120.322	0	120.322	0	120.322	0	120.322	2	120.322	0	120.322	0	120.322	2	120.322	0	100.842	139	160.38	9	100.842	24	100.842	12	100.301	16	100.301	30	100.301	14	100.301	0
120.329	2	120.329	0	120.329	2	120.329	4	120.329	0	120.329	0	120.329	0	120.329	5	120.329	0	120.329	0	120.329	3	120.329	2	100.848	96	160.388	4	100.848	9	100.848	23	100.307	12	100.307	56	100.307	21	100.307	0
120.336	0	120.336	1	120.336	0	120.336	0	120.336	0	120.336	0	120.336	0	120.336	9	120.336	0	120.336	0	120.336	0	120.336	2	100.855	78	160.396	9	100.855	23	100.855	28	100.314	24	100.314	33	100.314	16	100.314	0
120.343	0	120.343	1	120.343	0	120.343	3	120.343	0	120.343	0	120.343	0	120.343	13	120.343	0	120.343	0	120.343	4	120.343	1	100.861	145	160.404	22	100.861	42	100.861	51	100.32	6	100.32	20	100.32	7	100.32	6
120.35	3	120.35	0	120.35	0	120.35	2	120.35	0	120.35	0	120.35	0	120.35	0	120.35	0	120.35	0	120.35	0	120.35	4	100.868	133	160.412	11	100.868	59	100.868	64	100.327	30	100.327	7	100.327	6	100.327	5
120.357	0	120.357	2	120.357	1	120.357	1	120.357	0	120.357	0	120.357	0	120.357	3	120.357	0	120.357	0	120.357	3	120.357	1	100.874	108	160.42	3	100.874	40	100.874	41	100.333	20	100.333	25	100.333	45	100.333	45
120.364	0	120.364	0	120.364	4	120.364	0	120.364	0	120.364	0	120.364	0	120.364	2	120.364	0	120.364	0	120.364	0	120.364	3	100.88	130	160.429	17	100.88	20	100.88	22	100.34	8	100.34	46	100.34	65	100.34	23
120.371	2	120.371	0	120.371	2	120.371	0	120.371	0	120.371	0	120.371	0	120.371	0	120.371	0	120.371	0	120.371	5	120.371	0	100.887	130	160.437	11	100.887	67	100.887	36	100.346	4	100.346	26	100.346	36	100.346	23
120.378	0	120.378	1	120.378	1	120.378	2	120.378	0	120.378	0	120.378	0	120.378	1	120.378	0	120.378	0	120.378	1	120.378	0	100.893	175	160.445	3	100.893	64	100.893	47	100.352	3	100.352	32	100.352	20	100.352	8
120.386	0	120.386	0	120.386	1	120.386	5	120.386	0	120.386	0	120.386	0	120.386	3	120.386	0	120.386	0	120.386	6	120.386	0	100.9	139	160.453	0	100.9	37	100.9	27	100.359	0	100.359	29	100.359	13	100.359	0
120.393	0	120.393	0	120.393	0	120.393	1	120.393	0	120.393	0	120.393	0	120.393	14	120.393	0	120.393	0	120.393	1	120.393	0	100.906	94	160.461	9	100.906	34	100.906	12	100.365	0	100.365	32	100.365	9	100.365	1
120.4	0	120.4	0	120.4	0	120.4	0	120.4	0	120.4	0	120.4	0	120.4	16	120.4	0	120.4	0	120.4	2	120.4	6	100.913	73	160.469	12	100.913	28	100.913	29	100.372	0	100.372	34	100.372	17	100.372	14
120.407	0	120.407	0	120.407	0	120.407	1	120.407	0	120.407	0	120.407	0	120.407	4	120.407	0	120.407	0	120.407	1	120.407	6	100.919	93	160.477	2	100.919	23	100.919	61	100.378	0	100.378	12	100.378	30	100.378	9
120.414	0	120.414	0	120.414	0	120.414	3	120.414	0	120.414	0	120.414	0	120.414	3	120.414	0	120.414	5	120.414	5	120.414	7	100.926	161	160.485	0	100.926	19	100.926	39	100.385	0	100.385	0	100.385	34	100.385	19
120.421	0	120.421	7	120.421	0	120.421	8	120.421	0	120.421	0	120.421	0	120.421	1	120.421	0	120.421	2	120.421	0	120.421	3	100.932	111	160.494	3	100.932	15	100.932	65	100.391	0	100.391	18	100.391	26	100.391	9
120.428	3	120.428	1	120.428	3	120.428	1	120.428	0	120.428	0	120.428	0	120.428	1	120.428	0	120.428	0	120.428	2	120.428	1	100.939	95	160.502	6	100.939	9	100.939	37	100.397	0	100.397	20	100.397	18	100.397	5
120.435	1	120.435	0	120.435	0	120.435	2	120.435	0	120.435	0	120.435	0	120.435	0	120.435	0	120.435	0	120.435	0	120.435	4	100.945	86	160.51	15	100.945	4	100.945	26	100.404	0	100.404	21	100.404	10	100.404	0
120.442	0	120.442	0	120.442	1	120.442	1	120.442	0	120.442	0	120.442	0	120.442	1	120.442	0	120.442	0	120.442	0	120.442	16	100.952	98	160.518	17	100.952	10	100.952	29	100.41	0	100.41	17	100.41	15	100.41	0
120.449	0	120.449	0	120.449	0	120.449	0	120.449	0	120.449	0	120.449	0	120.449	0	120.449	0	120.449	0	120.449	0	120.449	9	100.958	123	160.526	8	100.958	13	100.958	18	100.417	0	100.417	10	100.417	15	100.417	0
120.456	0	120.456	0	120.456	4	120.456	0	120.456	0	120.456	0	120.456	0	120.456	0	120.456	0	120.456	0	120.456	0	120.456	9	100.965	133	160.534	5	100.965	33	100.965	8	100.423	0	100.423	3	100.423	36	100.423	3
120.463	0	120.463	3	120.463	20	120.463	0	120.463	0	120.463	0	120.463	0	120.463	2	120.463	0	120.463	0	120.463	2	120.463	16	100.971	141	160.542	5	100.971	11	100.971	8	100.43	11	100.43	5	100.43	37	100.43	1
120.47	0	120.47	6	120.47	10	120.47	0	120.47	0	120.47	0	120.47	0	120.47	1	120.47	0	120.47	0	120.47	6	120.47	5	100.978	83	160.55	4	100.978	7	100.978	5	100.436	13	100.436	10	100.436	16	100.436	8
120.477	6	120.477	3	120.477	2	120.477	1	120.477	0	120.477	0	120.477	0	120.477	2	120.477	0	120.477	0	120.477	0	120.477	9	100.984	52	160.559	3	100.984	5	100.984	9	100.442	3	100.442	14	100.442	16	100.442	23
120.484	2	120.484	0	120.484	2	120.484	0	120.484	0	120.484	0	120.484	0	120.484	1	120.484	0	120.484	0	120.484	1	120.484	5	100.991	42	160.567	4	100.991	0	100.991	43	100.449	1	100.449	2	100.449	38	100.449	26
120.491	0	120.491	0	120.491	2	120.491	3	120.491	0	120.491	0	120.491	0	120.491	2	120.491	0	120.491	0	120.491	0	120.491	3	100.997	36	160.575	0	100.997	9	100.997	28	100.455	0	100.455	2	100.455	45	100.455	13
120.499	0	120.499	0	120.499	1	120.499	2	120.499	0	120.499	0	120.499	0	120.499	1	120.499	0	120.499	0	120.499	4	120.499	1	101.004	23	160.583	0	101.004	53	101.004	12	100.462	0	100.462	13	100.462	34	100.462	3
120.506	0	120.506	0	120.506	0	120.506	0	120.506	0	120.506	0	120.506	0	120.506	0	120.506	0	120.506	0	120.506	2	120.506	2	101.01	52	160.591	0	101.01	30	101.01	9	100.468	0	100.468	43	100.468	44	100.468	0
120.513	0	120.513	0	120.513	2	120.513	2	120.513	0	120.513	0	120.513	0	120.513	0	120.513	0	120.513	0	120.513	1	120.513	0	101.017	89	160.599	0	101.017	19	101.017	16	100.475	0	100.475	20	100.475	27	100.475	0
120.52	0	120.52	0	120.52	1	120.52	2	120.52	0	120.52	0	120.52	0	120.52	0	120.52	0	120.52	0	120.52	4	120.52	1	101.023	81	160.607	0	101.023	11	101.023	8	100.481	1	100.481	31	100.481	24	100.481	2
120.527	0	120.527	0	120.527	1	120.527	0	120.527	0	120.527	0	120.527	0	120.527	4	120.527	0	120.527	0	120.527	1	120.527	4	101.03	68	160.615	0	101.03	12	101.03	23	100.487	3	100.487	33	100.487	36	100.487	0
120.534	0	120.534	1	120.534	16	120.534	0	120.534	0	120.534	0	120.534	0	120.534	0	120.534	0	120.534	0	120.534	0	120.534	6	101.036	59	160.624	0	101.036	22	101.036	73	100.494	0	100.494	32	100.494	20	100.494	3
120.541	0	120.541	0	120.541	3	120.541	2	120.541	0	120.541	0	120.541	0	120.541	1	120.541	0	120.541	0	120.541	0	120.541	0	101.042	85	160.632	0	101.042	8	101.042	45	100.5	0	100.5	36	100.5	11	100.5	29
120.548	0	120.548	0	120.548	1	120.548	0	120.548	0	120.548	0	120.548	0	120.548	0	120.548	0	120.548	0	120.548	0	120.548	0	101.049	79	160.64	0	101.049	40	101.049	41	100.507	13	100.507	44	100.507	8	100.507	18
120.555	0	120.555	3	120.555	0	120.555	5	120.555	0	120.555	0	120.555	0	120.555	0	120.555	0	120.555	0	120.555	0	120.555	1	101.055	135	160.648	0	101.055	21	101.055	65	100.513	25	100.513	27	100.513	5	100.513	10
120.562	0	120.562	5	120.562	5	120.562	1	120.562	0	120.562	0	120.562	0	120.562	0	120.562	0	120.562	0	120.562	6	120.562	1	101.062	148	160.656	0	101.062	3	101.062	45	100.52	6	100.52	21	100.52	5	100.52	14
120.569	0	120.569	0	120.569	4	120.569	1	120.569	0	120.569	0	120.569	0	120.569	0	120.569	0	120.569	0	120.569	1	120.569	5	101.068	147	160.664	0	101.068	0	101.068	25	100.526	8	100.526	28	100.526	28	100.526	5
120.576	0	120.576	0	120.576	1	120.576	1	120.576	0	120.576	0	120.576	0	120.576	3	120.576	0	120.576	0	120.576	2	120.576	0	101.075	153	160.672	0	101.075	2	101.075	17	100.532	26	100.532	21	100.532	45	100.532	2
120.583	0	120.583	0	120.583	1	120.583	0	120.583	0	120.583	0	120.583	0	120.583	2	120.583	0	120.583	1	120.583	6	120.583	2	101.081	171	160.68	0	101.081	15	101.081	38	100.539	3	100.539	26	100.539	22	100.539	8
120.59	0	120.59	0	120.59	0	120.59	1	120.59	0	120.59	0	120.59	0	120.59	4	120.59	0	120.59	0	120.59	12	120.59	2	101.088	195	160.689	0	101.088	49	101.088	21	100.545	1	100.545	24	100.545	11	100.545	8
120.597	2	120.597	0	120.597	1	120.597	3	120.597	0	120.597	0	120.597	0	120.597	5	120.597	0	120.597	0	120.597	8	120.597	6	101.094	155	160.697	0	101.094	52	101.094	5	100.552	3	100.552	5	100.552	7	100.552	0
120.605	1	120.605	0	120.605	1	120.605	2	120.605	0	120.605	0	120.605	0	120.605	7	120.605	0	120.605	0	120.605	1	120.605	0	101.101	148	160.705	6	101.101	18	101.101	6	100.558	14	100.558	0	100.558	12	100.558	9
120.612	0	120.612	3	120.612	1	120.612	0	120.612	0	120.612	0	120.612	0	120.612	9	120.612	0	120.612	0	120.612	3	120.612	0	101.107	138	160.713	4	101.107	7	101.107	16	100.565	3	100.565	12	100.565	14	100.565	23
120.619	0	120.619	0	120.619	0	120.619	0	120.619	0	120.619	0	120.619	0	120.619	7	120.619	0	120.619	0	120.619	2	120.619	1	101.114	135	160.721	0	101.114	22	101.114	7	100.571	10	100.571	20	100.571	4	100.571	12
120.626	0	120.626	0	120.626	3	120.626	2	120.626	0	120.626	0	120.626	0	120.626	4	120.626	0	120.626	0	120.626	0	120.626	2	101.12	108	160.729	0	101.12	19	101.12	5	100.577	16	100.577	6	100.577	9	100.577	1
120.633	0	120.633	0	120.633	0	120.633	1	120.633	0	120.633	0	120.633	0	120.633	1	120.633	0	120.633	0	120.633	1	120.633	0	101.127	94	160.737	0	101.127	4	101.127	14	100.584	4	100.584	8	100.584	7	100.584	0
120.64	0	120.64	1	120.64	0	120.64	0	120.64	0	120.64	0	120.64	0	120.64	2	120.64	0	120.64	0	120.64	8	120.64	7	101.133	136	160.746	0	101.133	40	101.133	7	100.59	0	100.59	0	100.59	21	100.59	0
120.647	0	120.647	4	120.647	1	120.647	0	120.647	0	120.647	0	120.647	0	120.647	0	120.647	0	120.647	0	120.647	0	120.647	7	101.14	147	160.754	0	101.14	37	101.14	22	100.597	0	100.597	2	100.597	21	100.597	9
120.654	0	120.654	3	120.654	4	120.654	0	120.654	0	120.654	0	120.654	0	120.654	0	120.654	0	120.654	0	120.654	3	120.654	3	101.146	134	160.762	0	101.146	27	101.146	30	100.603	25	100.603	0	100.603	12	100.603	8
120.661	0	120.661	0	120.661	0	120.661	1	120.661	0	120.661	0	120.661	0	120.661	4	120.661	0	120.661	0	120.661	0	120.661	1	101.153	108	160.77	0	101.153	24	101.153	25	100.61	23	100.61	20	100.61	6	100.61	11
120.668	0	120.668	3	120.668	0	120.668	0	120.668	0	120.668	0	120.668	0	120.668	1	120.668	0	120.668	0	120.668	3	120.668	9	101.159	108	160.778	0	101.159	16	101.159	7	100.616	15	100.616	24	100.616	4	100.616	9
120.675	0	120.675	5	120.675	0	120.675	0	120.675	0	120.675	0	120.675	0	120.675	0	120.675	0	120.675	0	120.675	3	120.675	0	101.166	116	160.786	0	101.166	12	101.166	9	100.622	14	100.622	7	100.622	9	100.622	0
120.682	0	120.682	1	120.682	1	120.682	0	120.682	0	120.682	0	120.682	0	120.682	1	120.682	0	120.682	0	120.682	2	120.682	1	101.172	83	160.794	0	101.172	5	101.172	26	100.629	15	100.629	11	100.629	8	100.629	4
120.689	0	120.689	0	120.689	8	120.689	3	120.689	0	120.689	0	120.689	0	120.689	0	120.689	0	120.689	0	120.689	1	120.689	1	101.179	63	160.802	9	101.179	17	101.179	21	100.635	23	100.635	7	100.635	21	100.635	39
120.696	0	120.696	0	120.696	3	120.696	1	120.696	0	120.696	0	120.696	0	120.696	5	120.696	0	120.696	0	120.696	8	120.696	1	101.185	106	160.811	11	101.185	28	101.185	30	100.642	8	100.642	22	100.642	16	100.642	24
120.703	0	120.703	2	120.703	3	120.703	0	120.703	0	120.703	0	120.703	0	120.703	4	120.703	0	120.703	0	120.703	0	120.703	2	101.192	149	160.819	2	101.192	24	101.192	31	100.648	3	100.648	46	100.648	7	100.648	15
120.711	0	120.711	0	120.711	0	120.711	0	120.711	0	120.711	0	120.711	0	120.711	6	120.711	0	120.711	0	120.711	1	120.711	1	101.198	93	160.827	0	101.198	10	101.198	31	100.655	0	100.655	41	100.655	12	100.655	12
120.718	0	120.718	1	120.718	0	120.718	0	120.718	0	120.718	0	120.718	0	120.718	0	120.718	0	120.718	0	120.718	1	120.718	0	101.205	111	160.835	0	101.205	9	101.205	52	100.661	0	100.661	49	100.661	35	100.661	11
120.725	0	120.725	0	120.725	0	120.725	2	120.725	0	120.725	0	120.725	0	120.725	0	120.725	0	120.725	0	120.725	0	120.725	0	101.211	129	160.843	0	101.211	5	101.211	19	100.667	9	100.667	21	100.667	31	100.667	6
120.732	0	120.732	0	120.732	0	120.732	4	120.732	0	120.732	0	120.732	0	120.732	0	120.732	0	120.732	0	120.732	2	120.732	4	101.218	134	160.851	2	101.218	10	101.218	39	100.674	9	100.674	42	100.674	12	100.674	1
120.739	0	120.739	4	120.739	0	120.739	4	120.739	0	120.739	0	120.739	0	120.739	5	120.739	0	120.739	0	120.739	5	120.739	4	101.224	119	160.859	2	101.224	12	101.224	39	100.68	3	100.68	62	100.68	9	100.68	20
120.746	0	120.746	0	120.746	0	120.746	1	120.746	0	120.746	0	120.746	0	120.746	13	120.746	0	120.746	0	120.746	0	120.746	6	101.231	118	160.868	3	101.231	8	101.231	30	100.687	0	100.687	32	100.687	8	100.687	21
120.753	0	120.753	0	120.753	0	120.753	0	120.753	0	120.753	0	120.753	0	120.753	3	120.753	0	120.753	0	120.753	1	120.753	1	101.237	107	160.876	0	101.237	16	101.237	20	100.693	0	100.693	10	100.693	81	100.693	23
120.76	0	120.76	0	120.76	0	120.76	0	120.76	0	120.76	0	120.76	0	120.76	6	120.76	0	120.76	0	120.76	1	120.76	0	101.244	123	160.884	2	101.244	18	101.244	49	100.7	0	100.7	36	100.7	85	100.7	10
120.767	0	120.767	2	120.767	2	120.767	0	120.767	0	120.767	0	120.767	0	120.767	5	120.767	0	120.767	0	120.767	5	120.767	0	101.25	99	160.892	1	101.25	11	101.25	22	100.706	0	100.706	36	100.706	51	100.706	16
120.774	0	120.774	0	120.774	0	120.774	0	120.774	0	120.774	0	120.774	0	120.774	3	120.774	0	120.774	0	120.774	10	120.774	1	101.257	90	160.9	4	101.257	5	101.257	8	100.712	0	100.712	33	100.712	39	100.712	12
120.781	0	120.781	0	120.781	0	120.781	0	120.781	0	120.781	0	120.781	0	120.781	11	120.781	0	120.781	0	120.781	5	120.781	8	101.263	98	160.908	0	101.263	3	101.263	2	100.719	0	100.719	23	100.719	53	100.719	9
120.788	0	120.788	0	120.788	4	120.788	0	120.788	0	120.788	0	120.788	0	120.788	11	120.788	0	120.788	0	120.788	2	120.788	3	101.269	100	160.916	0	101.269	4	101.269	1	100.725	0	100.725	23	100.725	62	100.725	14
120.795	0	120.795	8	120.795	6	120.795	1	120.795	0	120.795	0	120.795	0	120.795	7	120.795	0	120.795	0	120.795	0	120.795	0	101.276	76	160.925	0	101.276	15	101.276	0	100.732	0	100.732	8	100.732	40	100.732	4
120.803	0	120.803	5	120.803	2	120.803	5	120.803	0	120.803	0	120.803	0	120.803	21	120.803	0	120.803	0	120.803	4	120.803	0	101.282	102	160.933	0	101.282	11	101.282	5	100.738	0	100.738	12	100.738	35	100.738	0
120.81	0	120.81	0	120.81	6	120.81	9	120.81	0	120.81	0	120.81	0	120.81	54	120.81	0	120.81	0	120.81	2	120.81	6	101.289	111	160.941	0	101.289	12	101.289	0	100.745	0	100.745	31	100.745	52	100.745	5
120.817	0	120.817	0	120.817	30	120.817	3	120.817	0	120.817	0	120.817	0	120.817	69	120.817	0	120.817	0	120.817	7	120.817	1	101.295	64	160.949	0	101.295	23	101.295	10	100.751	0	100.751	28	100.751	46	100.751	7
120.824	0	120.824	4	120.824	31	120.824	2	120.824	0	120.824	0	120.824	0	120.824	97	120.824	0	120.824	0	120.824	7	120.824	3	101.302	65	160.957	0	101.302	24	101.302	5	100.758	0	100.758	37	100.758	28	100.758	6
120.831	0	120.831	2	120.831	25	120.831	1	120.831	0	120.831	0	120.831	0	120.831	156	120.831	0	120.831	0	120.831	4	120.831	21	101.308	110	160.965	0	101.308	11	101.308	14	100.764	0	100.764	22	100.764	26	100.764	27
120.838	0	120.838	3	120.838	53	120.838	0	120.838	0	120.838	0	120.838	0	120.838	250	120.838	0	120.838	0	120.838	14	120.838	26	101.315	140	160.973	1	101.315	2	101.315	20	100.77	0	100.77	20	100.77	16	100.77	36
120.845	3	120.845	3	120.845	90	120.845	9	120.845	0	120.845	0	120.845	0	120.845	273	120.845	0	120.845	0	120.845	18	120.845	36	101.321	96	160.982	0	101.321	18	101.321	54	100.777	0	100.777	27	100.777	10	100.777	11
120.852	1	120.852	4	120.852	139	120.852	10	120.852	0	120.852	0	120.852	0	120.852	288	120.852	0	120.852	0	120.852	25	120.852	43	101.328	77	160.99	0	101.328	24	101.328	79	100.783	0	100.783	16	100.783	7	100.783	2
120.859	0	120.859	8	120.859	261	120.859	30	120.859	0	120.859	0	120.859	0	120.859	379	120.859	0	120.859	0	120.859	35	120.859	69	101.334	62	160.998	4	101.334	11	101.334	41	100.79	0	100.79	10	100.79	14	100.79	2
120.866	0	120.866	12	120.866	360	120.866	66	120.866	0	120.866	0	120.866	0	120.866	429	120.866	0	120.866	0	120.866	65	120.866	118	101.341	87	161.006	0	101.341	1	101.341	26	100.796	8	100.796	1	100.796	14	100.796	0
120.873	0	120.873	15	120.873	440	120.873	98	120.873	0	120.873	0	120.873	0	120.873	508	120.873	0	120.873	0	120.873	89	120.873	147	101.347	111	161.014	0	101.347	7	101.347	29	100.803	21	100.803	24	100.803	8	100.803	0
120.88	8	120.88	29	120.88	608	120.88	153	120.88	0	120.88	0	120.88	0	120.88	522	120.88	0	120.88	0	120.88	123	120.88	241	101.354	109	161.022	3	101.354	16	101.354	14	100.809	12	100.809	10	100.809	22	100.809	0
120.887	0	120.887	39	120.887	842	120.887	193	120.887	0	120.887	0	120.887	0	120.887	474	120.887	0	120.887	7	120.887	113	120.887	277	101.36	177	161.03	0	101.36	14	101.36	5	100.815	3	100.815	11	100.815	37	100.815	9
120.894	1	120.894	29	120.894	1005	120.894	266	120.894	0	120.894	0	120.894	0	120.894	434	120.894	0	120.894	3	120.894	142	120.894	254	101.367	139	161.038	3	101.367	15	101.367	0	100.822	0	100.822	16	100.822	45	100.822	7
120.902	9	120.902	19	120.902	1305	120.902	299	120.902	1	120.902	0	120.902	0	120.902	490	120.902	0	120.902	15	120.902	129	120.902	283	101.373	93	161.047	0	101.373	5	101.373	0	100.828	6	100.828	18	100.828	36	100.828	1
120.909	6	120.909	27	120.909	1432	120.909	422	120.909	0	120.909	0	120.909	0	120.909	526	120.909	0	120.909	15	120.909	79	120.909	238	101.38	116	161.055	2	101.38	14	101.38	20	100.835	2	100.835	7	100.835	28	100.835	10
120.916	0	120.916	40	120.916	1496	120.916	487	120.916	2	120.916	0	120.916	0	120.916	487	120.916	0	120.916	17	120.916	59	120.916	252	101.386	129	161.063	0	101.386	10	101.386	33	100.841	1	100.841	10	100.841	19	100.841	10
120.923	1	120.923	40	120.923	1426	120.923	398	120.923	1	120.923	0	120.923	0	120.923	386	120.923	0	120.923	20	120.923	52	120.923	254	101.393	167	161.071	7	101.393	1	101.393	34	100.848	0	100.848	35	100.848	39	100.848	9
120.93	1	120.93	46	120.93	1210	120.93	358	120.93	1	120.93	0	120.93	0	120.93	322	120.93	2	120.93	21	120.93	83	120.93	174	101.399	128	161.079	5	101.399	26	101.399	28	100.854	0	100.854	23	100.854	23	100.854	0
120.937	2	120.937	37	120.937	1234	120.937	337	120.937	1	120.937	0	120.937	0	120.937	312	120.937	0	120.937	11	120.937	71	120.937	159	101.406	86	161.087	24	101.406	14	101.406	14	100.861	10	100.861	11	100.861	13	100.861	0
120.944	8	120.944	26	120.944	1123	120.944	322	120.944	2	120.944	0	120.944	0	120.944	257	120.944	0	120.944	5	120.944	76	120.944	125	101.412	125	161.095	27	101.412	17	101.412	13	100.867	12	100.867	3	100.867	9	100.867	0
120.951	5	120.951	36	120.951	980	120.951	249	120.951	1	120.951	0	120.951	0	120.951	222	120.951	0	120.951	2	120.951	38	120.951	141	101.419	182	161.104	9	101.419	22	101.419	21	100.873	10	100.873	5	100.873	25	100.873	0
120.958	4	120.958	17	120.958	742	120.958	201	120.958	0	120.958	0	120.958	0	120.958	163	120.958	0	120.958	7	120.958	21	120.958	97	101.425	138	161.112	4	101.425	19	101.425	23	100.88	10	100.88	45	100.88	31	100.88	0
120.965	0	120.965	19	120.965	580	120.965	157	120.965	0	120.965	0	120.965	0	120.965	129	120.965	0	120.965	3	120.965	30	120.965	82	101.432	127	161.12	0	101.432	15	101.432	21	100.886	0	100.886	43	100.886	20	100.886	5
120.972	1	120.972	22	120.972	425	120.972	105	120.972	2	120.972	0	120.972	0	120.972	90	120.972	0	120.972	6	120.972	10	120.972	69	101.438	104	161.128	0	101.438	3	101.438	16	100.893	0	100.893	28	100.893	11	100.893	23
120.979	0	120.979	6	120.979	325	120.979	66	120.979	3	120.979	0	120.979	0	120.979	107	120.979	0	120.979	7	120.979	26	120.979	51	101.445	105	161.136	9	101.445	3	101.445	15	100.899	0	100.899	7	100.899	7	100.899	12
120.987	0	120.987	8	120.987	257	120.987	69	120.987	4	120.987	0	120.987	0	120.987	87	120.987	0	120.987	1	120.987	32	120.987	32	101.451	91	161.144	55	101.451	28	101.451	31	100.906	0	100.906	2	100.906	5	100.906	27
120.994	0	120.994	14	120.994	166	120.994	52	120.994	0	120.994	0	120.994	0	120.994	43	120.994	0	120.994	0	120.994	27	120.994	19	101.458	101	161.152	27	101.458	19	101.458	14	100.912	16	100.912	22	100.912	3	100.912	11
121.001	1	121.001	16	121.001	108	121.001	36	121.001	0	121.001	0	121.001	4	121.001	46	121.001	0	121.001	1	121.001	11	121.001	11	101.464	107	161.161	22	101.464	33	101.464	32	100.918	25	100.918	9	100.918	1	100.918	60
121.008	0	121.008	3	121.008	63	121.008	33	121.008	0	121.008	0	121.008	3	121.008	29	121.008	0	121.008	0	121.008	11	121.008	9	101.471	85	161.169	12	101.471	48	101.471	39	100.925	15	100.925	23	100.925	3	100.925	74
121.015	0	121.015	1	121.015	38	121.015	43	121.015	0	121.015	0	121.015	1	121.015	26	121.015	0	121.015	0	121.015	2	121.015	8	101.477	84	161.177	29	101.477	30	101.477	45	100.931	26	100.931	26	100.931	3	100.931	24
121.022	6	121.022	3	121.022	30	121.022	36	121.022	0	121.022	0	121.022	0	121.022	19	121.022	0	121.022	0	121.022	1	121.022	8	101.484	85	161.185	47	101.484	23	101.484	33	100.938	8	100.938	10	100.938	3	100.938	5
121.029	2	121.029	0	121.029	16	121.029	25	121.029	0	121.029	0	121.029	0	121.029	8	121.029	0	121.029	0	121.029	5	121.029	7	101.49	104	161.193	67	101.49	16	101.49	22	100.944	14	100.944	9	100.944	3	100.944	0
121.036	0	121.036	1	121.036	17	121.036	23	121.036	0	121.036	0	121.036	0	121.036	15	121.036	0	121.036	0	121.036	18	121.036	13	101.497	113	161.201	55	101.497	23	101.497	23	100.951	15	100.951	22	100.951	5	100.951	11
121.043	7	121.043	4	121.043	12	121.043	3	121.043	0	121.043	0	121.043	0	121.043	13	121.043	0	121.043	0	121.043	9	121.043	7	101.503	137	161.209	33	101.503	29	101.503	68	100.957	7	100.957	17	100.957	24	100.957	11
121.05	4	121.05	0	121.05	4	121.05	3	121.05	0	121.05	0	121.05	0	121.05	8	121.05	0	121.05	0	121.05	3	121.05	2	101.51	225	161.218	22	101.51	21	101.51	36	100.964	0	100.964	9	100.964	33	100.964	12
121.057	0	121.057	2	121.057	1	121.057	13	121.057	0	121.057	0	121.057	0	121.057	8	121.057	0	121.057	0	121.057	1	121.057	4	101.516	202	161.226	7	101.516	18	101.516	47	100.97	0	100.97	10	100.97	33	100.97	2
121.064	5	121.064	13	121.064	3	121.064	8	121.064	0	121.064	0	121.064	0	121.064	3	121.064	0	121.064	0	121.064	5	121.064	5	101.523	180	161.234	27	101.523	51	101.523	33	100.976	0	100.976	13	100.976	15	100.976	0
121.071	5	121.071	4	121.071	2	121.071	0	121.071	0	121.071	0	121.071	0	121.071	9	121.071	0	121.071	0	121.071	5	121.071	8	101.529	172	161.242	23	101.529	45	101.529	48	100.983	5	100.983	19	100.983	18	100.983	0
121.079	0	121.079	0	121.079	7	121.079	1	121.079	0	121.079	0	121.079	0	121.079	4	121.079	0	121.079	0	121.079	8	121.079	0	101.536	131	161.25	26	101.536	100	101.536	23	100.989	7	100.989	25	100.989	9	100.989	3
121.086	0	121.086	5	121.086	0	121.086	0	121.086	0	121.086	0	121.086	0	121.086	0	121.086	0	121.086	0	121.086	3	121.086	0	101.542	94	161.258	6	101.542	87	101.542	18	100.996	0	100.996	27	100.996	5	100.996	19
121.093	0	121.093	2	121.093	1	121.093	4	121.093	0	121.093	0	121.093	2	121.093	2	121.093	0	121.093	0	121.093	5	121.093	4	101.549	115	161.267	23	101.549	35	101.549	7	101.002	0	101.002	49	101.002	12	101.002	8
121.1	0	121.1	0	121.1	0	121.1	1	121.1	0	121.1	0	121.1	0	121.1	10	121.1	0	121.1	0	121.1	0	121.1	2	101.555	90	161.275	59	101.555	15	101.555	16	101.009	26	101.009	29	101.009	10	101.009	2
121.107	0	121.107	4	121.107	0	121.107	2	121.107	0	121.107	0	121.107	0	121.107	4	121.107	0	121.107	0	121.107	2	121.107	0	101.562	74	161.283	55	101.562	57	101.562	3	101.015	15	101.015	22	101.015	11	101.015	0
121.114	0	121.114	5	121.114	5	121.114	0	121.114	0	121.114	0	121.114	0	121.114	0	121.114	0	121.114	0	121.114	0	121.114	5	101.568	100	161.291	46	101.568	64	101.568	11	101.022	3	101.022	10	101.022	3	101.022	0
121.121	0	121.121	0	121.121	2	121.121	0	121.121	0	121.121	0	121.121	0	121.121	1	121.121	0	121.121	0	121.121	2	121.121	1	101.575	157	161.299	20	101.575	39	101.575	18	101.028	1	101.028	9	101.028	14	101.028	0
121.128	0	121.128	7	121.128	0	121.128	0	121.128	0	121.128	0	121.128	0	121.128	6	121.128	0	121.128	0	121.128	1	121.128	2	101.581	203	161.307	129	101.581	20	101.581	39	101.034	0	101.034	5	101.034	25	101.034	12
121.135	0	121.135	9	121.135	0	121.135	3	121.135	0	121.135	0	121.135	0	121.135	6	121.135	0	121.135	0	121.135	1	121.135	0	101.588	136	161.315	112	101.588	16	101.588	79	101.041	0	101.041	2	101.041	11	101.041	10
121.142	1	121.142	5	121.142	0	121.142	2	121.142	0	121.142	0	121.142	0	121.142	4	121.142	0	121.142	0	121.142	0	121.142	0	101.594	113	161.324	74	101.594	5	101.594	69	101.047	1	101.047	0	101.047	4	101.047	7
121.149	1	121.149	3	121.149	0	121.149	2	121.149	0	121.149	0	121.149	0	121.149	0	121.149	0	121.149	0	121.149	1	121.149	0	101.601	78	161.332	102	101.601	10	101.601	57	101.054	0	101.054	26	101.054	3	101.054	5
121.156	0	121.156	1	121.156	0	121.156	3	121.156	0	121.156	0	121.156	0	121.156	0	121.156	0	121.156	0	121.156	1	121.156	0	101.607	64	161.34	65	101.607	18	101.607	75	101.06	0	101.06	43	101.06	18	101.06	7
121.164	0	121.164	0	121.164	0	121.164	16	121.164	0	121.164	0	121.164	0	121.164	7	121.164	0	121.164	0	121.164	5	121.164	0	101.614	82	161.348	48	101.614	43	101.614	64	101.067	0	101.067	38	101.067	22	101.067	2
121.171	0	121.171	2	121.171	1	121.171	18	121.171	0	121.171	0	121.171	0	121.171	4	121.171	0	121.171	0	121.171	11	121.171	7	101.62	43	161.356	39	101.62	66	101.62	39	101.073	2	101.073	26	101.073	11	101.073	0
121.178	0	121.178	3	121.178	5	121.178	3	121.178	0	121.178	0	121.178	0	121.178	1	121.178	0	121.178	0	121.178	3	121.178	9	101.627	30	161.364	10	101.627	51	101.627	35	101.08	1	101.08	11	101.08	14	101.08	2
121.185	0	121.185	0	121.185	0	121.185	5	121.185	0	121.185	0	121.185	0	121.185	0	121.185	0	121.185	0	121.185	2	121.185	0	101.633	71	161.372	2	101.633	44	101.633	80	101.086	1	101.086	42	101.086	24	101.086	6
121.192	0	121.192	0	121.192	0	121.192	6	121.192	0	121.192	0	121.192	0	121.192	2	121.192	0	121.192	0	121.192	1	121.192	1	101.64	110	161.381	22	101.64	54	101.64	50	101.092	1	101.092	32	101.092	24	101.092	0
121.199	0	121.199	0	121.199	0	121.199	4	121.199	0	121.199	0	121.199	0	121.199	1	121.199	0	121.199	0	121.199	1	121.199	5	101.646	124	161.389	79	101.646	30	101.646	51	101.099	5	101.099	13	101.099	11	101.099	0
121.206	0	121.206	0	121.206	1	121.206	0	121.206	0	121.206	0	121.206	0	121.206	1	121.206	0	121.206	0	121.206	6	121.206	2	101.653	102	161.397	35	101.653	19	101.653	44	101.105	0	101.105	10	101.105	10	101.105	0
121.213	0	121.213	0	121.213	0	121.213	0	121.213	0	121.213	0	121.213	0	121.213	0	121.213	0	121.213	0	121.213	2	121.213	0	101.659	88	161.405	11	101.659	8	101.659	28	101.112	0	101.112	37	101.112	21	101.112	17
121.22	0	121.22	0	121.22	1	121.22	0	121.22	0	121.22	0	121.22	0	121.22	2	121.22	0	121.22	0	121.22	2	121.22	0	101.666	69	161.413	18	101.666	15	101.666	75	101.118	0	101.118	28	101.118	17	101.118	27
121.227	0	121.227	0	121.227	4	121.227	1	121.227	0	121.227	0	121.227	0	121.227	0	121.227	0	121.227	0	121.227	3	121.227	0	101.672	55	161.421	22	101.672	23	101.672	94	101.125	0	101.125	13	101.125	12	101.125	9
121.234	0	121.234	0	121.234	0	121.234	0	121.234	0	121.234	0	121.234	0	121.234	1	121.234	0	121.234	0	121.234	0	121.234	0	101.679	58	161.429	17	101.679	25	101.679	143	101.131	0	101.131	19	101.131	13	101.131	23
121.242	0	121.242	2	121.242	0	121.242	5	121.242	0	121.242	0	121.242	0	121.242	0	121.242	0	121.242	0	121.242	3	121.242	4	101.685	74	161.438	3	101.685	24	101.685	136	101.138	0	101.138	23	101.138	5	101.138	15
121.249	0	121.249	0	121.249	0	121.249	1	121.249	0	121.249	0	121.249	0	121.249	0	121.249	0	121.249	0	121.249	2	121.249	5	101.692	85	161.446	0	101.692	19	101.692	109	101.144	0	101.144	11	101.144	3	101.144	1
121.256	0	121.256	0	121.256	10	121.256	0	121.256	0	121.256	0	121.256	0	121.256	1	121.256	0	121.256	0	121.256	0	121.256	3	101.698	78	161.454	0	101.698	9	101.698	139	101.151	0	101.151	7	101.151	10	101.151	0
121.263	0	121.263	0	121.263	3	121.263	1	121.263	0	121.263	0	121.263	0	121.263	1	121.263	0	121.263	0	121.263	4	121.263	12	101.705	67	161.462	3	101.705	4	101.705	122	101.157	0	101.157	2	101.157	33	101.157	27
121.27	0	121.27	3	121.27	0	121.27	0	121.27	0	121.27	0	121.27	0	121.27	0	121.27	0	121.27	0	121.27	6	121.27	14	101.711	84	161.47	16	101.711	1	101.711	55	101.163	0	101.163	32	101.163	37	101.163	49
121.277	0	121.277	3	121.277	0	121.277	0	121.277	0	121.277	0	121.277	0	121.277	0	121.277	0	121.277	0	121.277	7	121.277	6	101.718	78	161.478	9	101.718	11	101.718	13	101.17	0	101.17	26	101.17	29	101.17	26
121.284	0	121.284	1	121.284	0	121.284	2	121.284	0	121.284	0	121.284	0	121.284	1	121.284	0	121.284	0	121.284	0	121.284	0	101.724	100	161.487	3	101.724	11	101.724	8	101.176	0	101.176	4	101.176	56	101.176	10
121.291	0	121.291	0	121.291	0	121.291	0	121.291	0	121.291	0	121.291	0	121.291	3	121.291	0	121.291	0	121.291	1	121.291	0	101.731	165	161.495	0	101.731	12	101.731	14	101.183	0	101.183	35	101.183	40	101.183	24
121.298	5	121.298	4	121.298	0	121.298	1	121.298	0	121.298	0	121.298	0	121.298	0	121.298	0	121.298	0	121.298	0	121.298	1	101.737	168	161.503	0	101.737	5	101.737	21	101.189	0	101.189	23	101.189	20	101.189	5
121.305	6	121.305	0	121.305	0	121.305	1	121.305	0	121.305	0	121.305	0	121.305	0	121.305	0	121.305	0	121.305	0	121.305	1	101.744	115	161.511	0	101.744	2	101.744	20	101.196	3	101.196	38	101.196	13	101.196	6
121.312	0	121.312	0	121.312	0	121.312	6	121.312	0	121.312	0	121.312	0	121.312	3	121.312	0	121.312	0	121.312	0	121.312	7	101.75	92	161.519	0	101.75	9	101.75	28	101.202	12	101.202	16	101.202	9	101.202	4
121.319	0	121.319	6	121.319	0	121.319	3	121.319	0	121.319	0	121.319	0	121.319	5	121.319	0	121.319	0	121.319	2	121.319	6	101.757	149	161.527	0	101.757	17	101.757	30	101.209	2	101.209	33	101.209	10	101.209	15
121.327	0	121.327	1	121.327	5	121.327	3	121.327	0	121.327	0	121.327	0	121.327	0	121.327	0	121.327	0	121.327	0	121.327	5	101.763	152	161.535	0	101.763	12	101.763	19	101.215	0	101.215	29	101.215	11	101.215	29
121.334	0	121.334	0	121.334	0	121.334	4	121.334	0	121.334	0	121.334	0	121.334	3	121.334	0	121.334	0	121.334	4	121.334	2	101.77	181	161.544	10	101.77	8	101.77	26	101.221	1	101.221	28	101.221	24	101.221	39
121.341	0	121.341	0	121.341	0	121.341	2	121.341	0	121.341	0	121.341	0	121.341	0	121.341	0	121.341	0	121.341	0	121.341	0	101.776	128	161.552	11	101.776	15	101.776	32	101.228	2	101.228	10	101.228	29	101.228	22
121.348	0	121.348	1	121.348	0	121.348	5	121.348	0	121.348	0	121.348	0	121.348	1	121.348	0	121.348	0	121.348	0	121.348	6	101.783	89	161.56	4	101.783	14	101.783	51	101.234	13	101.234	20	101.234	49	101.234	33
121.355	0	121.355	1	121.355	0	121.355	0	121.355	0	121.355	0	121.355	0	121.355	14	121.355	0	121.355	0	121.355	4	121.355	0	101.789	91	161.568	0	101.789	29	101.789	40	101.241	9	101.241	28	101.241	39	101.241	13
121.362	0	121.362	1	121.362	0	121.362	6	121.362	0	121.362	0	121.362	0	121.362	2	121.362	0	121.362	0	121.362	3	121.362	1	101.796	60	161.576	8	101.796	21	101.796	25	101.247	1	101.247	22	101.247	20	101.247	3
121.369	0	121.369	0	121.369	0	121.369	0	121.369	0	121.369	0	121.369	0	121.369	4	121.369	0	121.369	0	121.369	0	121.369	3	101.802	36	161.584	3	101.802	54	101.802	26	101.254	0	101.254	58	101.254	19	101.254	23
121.376	0	121.376	0	121.376	0	121.376	0	121.376	0	121.376	0	121.376	0	121.376	3	121.376	0	121.376	0	121.376	0	121.376	13	101.809	73	161.593	5	101.809	40	101.809	25	101.26	0	101.26	38	101.26	16	101.26	35
121.383	0	121.383	0	121.383	1	121.383	0	121.383	0	121.383	0	121.383	0	121.383	0	121.383	0	121.383	0	121.383	0	121.383	9	101.815	79	161.601	29	101.815	23	101.815	58	101.267	0	101.267	27	101.267	11	101.267	28
121.39	0	121.39	0	121.39	5	121.39	2	121.39	0	121.39	0	121.39	0	121.39	2	121.39	0	121.39	0	121.39	1	121.39	6	101.822	81	161.609	11	101.822	12	101.822	55	101.273	0	101.273	32	101.273	24	101.273	19
121.397	0	121.397	3	121.397	2	121.397	1	121.397	0	121.397	0	121.397	0	121.397	1	121.397	0	121.397	0	121.397	0	121.397	0	101.828	71	161.617	3	101.828	8	101.828	51	101.28	0	101.28	26	101.28	17	101.28	9
121.405	2	121.405	8	121.405	0	121.405	5	121.405	0	121.405	0	121.405	0	121.405	2	121.405	0	121.405	0	121.405	1	121.405	15	101.835	91	161.625	0	101.835	22	101.835	21	101.286	0	101.286	19	101.286	9	101.286	3
121.412	0	121.412	0	121.412	0	121.412	3	121.412	0	121.412	0	121.412	0	121.412	0	121.412	0	121.412	0	121.412	3	121.412	9	101.841	104	161.633	0	101.841	15	101.841	14	101.292	0	101.292	21	101.292	13	101.292	0
121.419	0	121.419	0	121.419	0	121.419	4	121.419	0	121.419	0	121.419	0	121.419	3	121.419	0	121.419	0	121.419	3	121.419	1	101.848	83	161.641	7	101.848	3	101.848	7	101.299	0	101.299	14	101.299	8	101.299	1
121.426	0	121.426	1	121.426	0	121.426	6	121.426	0	121.426	0	121.426	0	121.426	0	121.426	0	121.426	0	121.426	1	121.426	1	101.854	55	161.65	5	101.854	8	101.854	22	101.305	0	101.305	12	101.305	14	101.305	11
121.433	0	121.433	1	121.433	1	121.433	0	121.433	0	121.433	0	121.433	0	121.433	0	121.433	0	121.433	0	121.433	3	121.433	6	101.861	128	161.658	1	101.861	2	101.861	70	101.312	5	101.312	9	101.312	56	101.312	5
121.44	0	121.44	5	121.44	1	121.44	0	121.44	0	121.44	0	121.44	0	121.44	5	121.44	0	121.44	0	121.44	0	121.44	0	101.867	117	161.666	23	101.867	5	101.867	60	101.318	0	101.318	9	101.318	28	101.318	3
121.447	0	121.447	1	121.447	16	121.447	1	121.447	0	121.447	0	121.447	0	121.447	5	121.447	0	121.447	0	121.447	1	121.447	0	101.874	69	161.674	13	101.874	15	101.874	71	101.325	0	101.325	17	101.325	16	101.325	10
121.454	0	121.454	0	121.454	5	121.454	1	121.454	0	121.454	0	121.454	0	121.454	1	121.454	0	121.454	0	121.454	3	121.454	0	101.88	50	161.682	3	101.88	67	101.88	91	101.331	0	101.331	25	101.331	12	101.331	4
121.461	0	121.461	0	121.461	0	121.461	0	121.461	0	121.461	0	121.461	0	121.461	1	121.461	0	121.461	0	121.461	0	121.461	0	101.887	71	161.69	0	101.887	71	101.887	70	101.338	0	101.338	49	101.338	5	101.338	5
121.468	0	121.468	4	121.468	8	121.468	5	121.468	0	121.468	0	121.468	0	121.468	8	121.468	0	121.468	0	121.468	1	121.468	1	101.894	112	161.699	0	101.894	41	101.894	77	101.344	0	101.344	39	101.344	3	101.344	0
121.475	0	121.475	3	121.475	4	121.475	0	121.475	0	121.475	0	121.475	0	121.475	4	121.475	0	121.475	0	121.475	3	121.475	2	101.9	78	161.707	0	101.9	20	101.9	76	101.351	0	101.351	11	101.351	10	101.351	5
121.483	0	121.483	3	121.483	0	121.483	0	121.483	0	121.483	0	121.483	0	121.483	7	121.483	0	121.483	0	121.483	4	121.483	5	101.907	46	161.715	0	101.907	9	101.907	34	101.357	0	101.357	13	101.357	9	101.357	1
121.49	0	121.49	0	121.49	3	121.49	0	121.49	0	121.49	0	121.49	0	121.49	9	121.49	0	121.49	0	121.49	0	121.49	1	101.913	62	161.723	0	101.913	0	101.913	40	101.363	0	101.363	21	101.363	11	101.363	4
121.497	0	121.497	0	121.497	2	121.497	0	121.497	0	121.497	0	121.497	0	121.497	2	121.497	0	121.497	0	121.497	1	121.497	0	101.92	92	161.731	9	101.92	17	101.92	17	101.37	0	101.37	18	101.37	24	101.37	3
121.504	0	121.504	0	121.504	3	121.504	10	121.504	0	121.504	0	121.504	0	121.504	2	121.504	0	121.504	0	121.504	4	121.504	0	101.926	178	161.739	3	101.926	11	101.926	3	101.376	0	101.376	33	101.376	30	101.376	2
121.511	0	121.511	8	121.511	0	121.511	2	121.511	0	121.511	0	121.511	0	121.511	1	121.511	0	121.511	0	121.511	8	121.511	14	101.933	173	161.748	0	101.933	11	101.933	9	101.383	0	101.383	33	101.383	15	101.383	3
121.518	0	121.518	1	121.518	1	121.518	0	121.518	0	121.518	0	121.518	0	121.518	2	121.518	0	121.518	0	121.518	5	121.518	5	101.939	147	161.756	0	101.939	19	101.939	36	101.389	0	101.389	25	101.389	24	101.389	1
121.525	0	121.525	0	121.525	3	121.525	1	121.525	0	121.525	0	121.525	0	121.525	2	121.525	0	121.525	0	121.525	8	121.525	2	101.946	99	161.764	0	101.946	8	101.946	56	101.396	0	101.396	5	101.396	21	101.396	0
121.532	0	121.532	1	121.532	1	121.532	0	121.532	0	121.532	0	121.532	0	121.532	0	121.532	0	121.532	0	121.532	1	121.532	2	101.952	78	161.772	0	101.952	32	101.952	45	101.402	0	101.402	12	101.402	23	101.402	1
121.539	0	121.539	2	121.539	0	121.539	2	121.539	0	121.539	0	121.539	0	121.539	1	121.539	0	121.539	0	121.539	0	121.539	2	101.959	79	161.78	0	101.959	31	101.959	25	101.409	5	101.409	9	101.409	31	101.409	8
121.546	0	121.546	11	121.546	2	121.546	1	121.546	0	121.546	0	121.546	0	121.546	6	121.546	0	121.546	0	121.546	3	121.546	7	101.965	82	161.788	0	101.965	23	101.965	12	101.415	7	101.415	3	101.415	45	101.415	9
121.554	0	121.554	3	121.554	4	121.554	3	121.554	0	121.554	0	121.554	0	121.554	5	121.554	0	121.554	0	121.554	7	121.554	1	101.972	82	161.796	0	101.972	10	101.972	26	101.422	0	101.422	23	101.422	72	101.422	0
121.561	0	121.561	0	121.561	0	121.561	1	121.561	0	121.561	0	121.561	0	121.561	1	121.561	0	121.561	0	121.561	0	121.561	6	101.978	87	161.805	6	101.978	31	101.978	40	101.428	5	101.428	19	101.428	45	101.428	0
121.568	0	121.568	0	121.568	0	121.568	0	121.568	0	121.568	0	121.568	0	121.568	0	121.568	0	121.568	0	121.568	2	121.568	4	101.985	88	161.813	17	101.985	13	101.985	18	101.434	2	101.434	2	101.434	27	101.434	0
121.575	0	121.575	0	121.575	0	121.575	0	121.575	0	121.575	0	121.575	0	121.575	0	121.575	0	121.575	0	121.575	3	121.575	0	101.991	62	161.821	5	101.991	6	101.991	13	101.441	0	101.441	12	101.441	34	101.441	0
121.582	0	121.582	0	121.582	0	121.582	0	121.582	0	121.582	0	121.582	0	121.582	3	121.582	0	121.582	0	121.582	2	121.582	0	101.998	61	161.829	1	101.998	7	101.998	13	101.447	2	101.447	13	101.447	40	101.447	2
121.589	0	121.589	0	121.589	0	121.589	1	121.589	0	121.589	0	121.589	0	121.589	5	121.589	0	121.589	0	121.589	0	121.589	0	102.004	93	161.837	0	102.004	5	102.004	19	101.454	3	101.454	19	101.454	47	101.454	0
121.596	0	121.596	0	121.596	5	121.596	2	121.596	0	121.596	0	121.596	0	121.596	0	121.596	0	121.596	0	121.596	0	121.596	0	102.011	98	161.845	0	102.011	27	102.011	30	101.46	9	101.46	26	101.46	30	101.46	0
121.603	0	121.603	0	121.603	3	121.603	0	121.603	0	121.603	0	121.603	0	121.603	1	121.603	0	121.603	0	121.603	1	121.603	1	102.017	94	161.854	0	102.017	31	102.017	79	101.467	17	101.467	36	101.467	16	101.467	0
121.61	0	121.61	1	121.61	1	121.61	5	121.61	0	121.61	0	121.61	0	121.61	1	121.61	0	121.61	0	121.61	1	121.61	2	102.024	109	161.862	0	102.024	21	102.024	47	101.473	23	101.473	15	101.473	10	101.473	0
121.617	4	121.617	0	121.617	1	121.617	2	121.617	0	121.617	0	121.617	0	121.617	3	121.617	0	121.617	0	121.617	0	121.617	1	102.03	91	161.87	0	102.03	5	102.03	46	101.48	19	101.48	21	101.48	9	101.48	0
121.624	1	121.624	1	121.624	4	121.624	0	121.624	0	121.624	0	121.624	0	121.624	2	121.624	0	121.624	0	121.624	0	121.624	1	102.037	109	161.878	0	102.037	7	102.037	41	101.486	8	101.486	20	101.486	12	101.486	0
121.632	0	121.632	0	121.632	1	121.632	0	121.632	0	121.632	0	121.632	0	121.632	0	121.632	0	121.632	0	121.632	12	121.632	4	102.043	100	161.886	0	102.043	0	102.043	21	101.493	25	101.493	16	101.493	9	101.493	0
121.639	0	121.639	3	121.639	0	121.639	3	121.639	0	121.639	0	121.639	0	121.639	0	121.639	0	121.639	0	121.639	16	121.639	0	102.05	93	161.894	3	102.05	11	102.05	48	101.499	9	101.499	19	101.499	35	101.499	14
121.646	0	121.646	1	121.646	0	121.646	0	121.646	0	121.646	0	121.646	0	121.646	1	121.646	0	121.646	0	121.646	5	121.646	1	102.056	92	161.903	2	102.056	13	102.056	41	101.506	3	101.506	47	101.506	55	101.506	22
121.653	0	121.653	4	121.653	3	121.653	3	121.653	0	121.653	0	121.653	0	121.653	7	121.653	0	121.653	0	121.653	0	121.653	1	102.063	82	161.911	0	102.063	27	102.063	24	101.512	0	101.512	19	101.512	40	101.512	16
121.66	0	121.66	0	121.66	0	121.66	0	121.66	0	121.66	0	121.66	0	121.66	4	121.66	0	121.66	0	121.66	3	121.66	1	102.069	49	161.919	5	102.069	11	102.069	43	101.518	0	101.518	17	101.518	24	101.518	3
121.667	0	121.667	2	121.667	0	121.667	1	121.667	0	121.667	0	121.667	0	121.667	1	121.667	0	121.667	0	121.667	0	121.667	0	102.076	35	161.927	9	102.076	4	102.076	27	101.525	4	101.525	31	101.525	14	101.525	9
121.674	0	121.674	1	121.674	0	121.674	4	121.674	0	121.674	0	121.674	0	121.674	0	121.674	0	121.674	0	121.674	9	121.674	0	102.082	48	161.935	1	102.082	9	102.082	30	101.531	15	101.531	48	101.531	10	101.531	28
121.681	0	121.681	4	121.681	0	121.681	0	121.681	0	121.681	0	121.681	0	121.681	0	121.681	0	121.681	0	121.681	6	121.681	3	102.089	52	161.943	0	102.089	1	102.089	21	101.538	19	101.538	36	101.538	5	101.538	16
121.688	0	121.688	5	121.688	0	121.688	1	121.688	0	121.688	0	121.688	0	121.688	0	121.688	0	121.688	0	121.688	5	121.688	2	102.095	107	161.952	1	102.095	2	102.095	10	101.544	4	101.544	21	101.544	11	101.544	38
121.695	0	121.695	1	121.695	1	121.695	0	121.695	0	121.695	0	121.695	0	121.695	2	121.695	0	121.695	0	121.695	2	121.695	0	102.102	78	161.96	1	102.102	14	102.102	18	101.551	1	101.551	10	101.551	9	101.551	17
121.703	0	121.703	0	121.703	0	121.703	0	121.703	0	121.703	0	121.703	0	121.703	0	121.703	0	121.703	0	121.703	3	121.703	5	102.108	64	161.968	0	102.108	12	102.108	13	101.557	0	101.557	9	101.557	13	101.557	4
121.71	0	121.71	1	121.71	0	121.71	0	121.71	0	121.71	0	121.71	0	121.71	0	121.71	0	121.71	0	121.71	2	121.71	1	102.115	74	161.976	0	102.115	2	102.115	16	101.564	20	101.564	14	101.564	35	101.564	3
121.717	0	121.717	0	121.717	0	121.717	0	121.717	0	121.717	0	121.717	0	121.717	0	121.717	0	121.717	0	121.717	5	121.717	0	102.121	63	161.984	0	102.121	1	102.121	54	101.57	18	101.57	8	101.57	22	101.57	5
121.724	0	121.724	0	121.724	2	121.724	0	121.724	0	121.724	0	121.724	0	121.724	0	121.724	0	121.724	0	121.724	2	121.724	1	102.128	57	161.992	0	102.128	28	102.128	30	101.577	4	101.577	7	101.577	13	101.577	1
121.731	0	121.731	6	121.731	0	121.731	0	121.731	0	121.731	0	121.731	0	121.731	0	121.731	0	121.731	0	121.731	0	121.731	1	102.135	99	162.001	0	102.135	13	102.135	42	101.583	0	101.583	10	101.583	23	101.583	0
121.738	0	121.738	2	121.738	0	121.738	0	121.738	0	121.738	0	121.738	0	121.738	0	121.738	0	121.738	0	121.738	2	121.738	0	102.141	161	162.009	20	102.141	4	102.141	30	101.59	5	101.59	3	101.59	13	101.59	0
121.745	0	121.745	0	121.745	0	121.745	1	121.745	0	121.745	0	121.745	0	121.745	1	121.745	0	121.745	0	121.745	0	121.745	2	102.148	138	162.017	9	102.148	0	102.148	6	101.596	15	101.596	22	101.596	15	101.596	5
121.752	0	121.752	0	121.752	0	121.752	0	121.752	0	121.752	0	121.752	0	121.752	0	121.752	0	121.752	0	121.752	2	121.752	0	102.154	160	162.025	3	102.154	0	102.154	9	101.602	7	101.602	36	101.602	17	101.602	10
121.759	1	121.759	0	121.759	0	121.759	0	121.759	0	121.759	0	121.759	0	121.759	0	121.759	0	121.759	0	121.759	1	121.759	4	102.161	111	162.033	0	102.161	5	102.161	23	101.609	3	101.609	38	101.609	7	101.609	28
121.767	0	121.767	0	121.767	0	121.767	0	121.767	0	121.767	0	121.767	0	121.767	0	121.767	0	121.767	0	121.767	3	121.767	1	102.167	143	162.041	0	102.167	23	102.167	14	101.615	0	101.615	41	101.615	4	101.615	20
121.774	0	121.774	0	121.774	0	121.774	1	121.774	0	121.774	0	121.774	0	121.774	0	121.774	0	121.774	0	121.774	1	121.774	5	102.174	77	162.05	0	102.174	31	102.174	23	101.622	11	101.622	54	101.622	5	101.622	15
121.781	0	121.781	0	121.781	0	121.781	0	121.781	0	121.781	0	121.781	0	121.781	0	121.781	0	121.781	0	121.781	0	121.781	4	102.18	68	162.058	0	102.18	24	102.18	26	101.628	39	101.628	29	101.628	28	101.628	5
121.788	0	121.788	0	121.788	0	121.788	8	121.788	0	121.788	0	121.788	0	121.788	2	121.788	0	121.788	0	121.788	1	121.788	8	102.187	55	162.066	0	102.187	61	102.187	29	101.635	29	101.635	16	101.635	36	101.635	22
121.795	0	121.795	0	121.795	0	121.795	1	121.795	0	121.795	0	121.795	0	121.795	0	121.795	0	121.795	0	121.795	3	121.795	5	102.193	50	162.074	0	102.193	54	102.193	39	101.641	10	101.641	14	101.641	22	101.641	9
121.802	0	121.802	0	121.802	0	121.802	1	121.802	0	121.802	0	121.802	0	121.802	2	121.802	0	121.802	0	121.802	1	121.802	1	102.2	43	162.082	0	102.2	27	102.2	43	101.648	1	101.648	9	101.648	15	101.648	2
121.809	0	121.809	1	121.809	0	121.809	0	121.809	0	121.809	0	121.809	0	121.809	3	121.809	0	121.809	0	121.809	2	121.809	1	102.206	53	162.09	0	102.206	15	102.206	26	101.654	0	101.654	10	101.654	32	101.654	1
121.816	0	121.816	0	121.816	0	121.816	0	121.816	0	121.816	0	121.816	0	121.816	0	121.816	0	121.816	0	121.816	6	121.816	5	102.213	66	162.099	0	102.213	11	102.213	31	101.661	0	101.661	13	101.661	17	101.661	5
121.823	0	121.823	0	121.823	0	121.823	7	121.823	0	121.823	0	121.823	0	121.823	0	121.823	0	121.823	0	121.823	2	121.823	3	102.219	66	162.107	0	102.219	18	102.219	17	101.667	0	101.667	14	101.667	19	101.667	1
121.83	3	121.83	7	121.83	0	121.83	7	121.83	0	121.83	0	121.83	0	121.83	1	121.83	0	121.83	0	121.83	3	121.83	0	102.226	117	162.115	0	102.226	28	102.226	0	101.674	0	101.674	2	101.674	38	101.674	1
121.838	1	121.838	3	121.838	3	121.838	3	121.838	0	121.838	0	121.838	0	121.838	1	121.838	0	121.838	0	121.838	1	121.838	2	102.232	92	162.123	0	102.232	15	102.232	7	101.68	0	101.68	17	101.68	25	101.68	15
121.845	2	121.845	0	121.845	0	121.845	9	121.845	0	121.845	0	121.845	0	121.845	3	121.845	0	121.845	0	121.845	1	121.845	1	102.239	90	162.131	0	102.239	3	102.239	4	101.686	0	101.686	23	101.686	16	101.686	8
121.852	8	121.852	0	121.852	5	121.852	2	121.852	0	121.852	0	121.852	0	121.852	4	121.852	0	121.852	0	121.852	9	121.852	9	102.245	86	162.139	11	102.245	21	102.245	5	101.693	10	101.693	9	101.693	11	101.693	2
121.859	3	121.859	0	121.859	0	121.859	1	121.859	0	121.859	0	121.859	0	121.859	6	121.859	0	121.859	0	121.859	8	121.859	6	102.252	63	162.148	16	102.252	12	102.252	0	101.699	12	101.699	4	101.699	14	101.699	1
121.866	4	121.866	0	121.866	6	121.866	0	121.866	0	121.866	0	121.866	0	121.866	1	121.866	0	121.866	0	121.866	4	121.866	9	102.258	55	162.156	9	102.258	10	102.258	0	101.706	25	101.706	17	101.706	17	101.706	19
121.873	3	121.873	0	121.873	6	121.873	5	121.873	0	121.873	0	121.873	0	121.873	1	121.873	0	121.873	0	121.873	10	121.873	16	102.265	77	162.164	16	102.265	12	102.265	21	101.712	12	101.712	12	101.712	54	101.712	11
121.88	1	121.88	0	121.88	7	121.88	6	121.88	0	121.88	0	121.88	0	121.88	7	121.88	0	121.88	0	121.88	9	121.88	9	102.271	99	162.172	52	102.271	8	102.271	21	101.719	3	101.719	12	101.719	48	101.719	9
121.887	0	121.887	0	121.887	13	121.887	2	121.887	0	121.887	0	121.887	0	121.887	9	121.887	0	121.887	0	121.887	5	121.887	0	102.278	103	162.18	35	102.278	4	102.278	15	101.725	0	101.725	24	101.725	22	101.725	31
121.894	0	121.894	2	121.894	8	121.894	1	121.894	0	121.894	0	121.894	0	121.894	10	121.894	0	121.894	1	121.894	0	121.894	0	102.284	112	162.188	24	102.284	8	102.284	12	101.732	0	101.732	8	101.732	14	101.732	17
121.901	4	121.901	0	121.901	19	121.901	14	121.901	6	121.901	0	121.901	0	121.901	8	121.901	0	121.901	1	121.901	5	121.901	10	102.291	93	162.197	78	102.291	42	102.291	9	101.738	2	101.738	8	101.738	22	101.738	2
121.909	7	121.909	3	121.909	27	121.909	4	121.909	0	121.909	0	121.909	0	121.909	8	121.909	0	121.909	0	121.909	7	121.909	9	102.298	66	162.205	86	102.298	15	102.298	17	101.745	14	101.745	9	101.745	36	101.745	2
121.916	4	121.916	0	121.916	4	121.916	6	121.916	0	121.916	0	121.916	0	121.916	5	121.916	0	121.916	0	121.916	8	121.916	9	102.304	121	162.213	37	102.304	6	102.304	5	101.751	4	101.751	16	101.751	38	101.751	2
121.923	2	121.923	0	121.923	11	121.923	1	121.923	0	121.923	0	121.923	0	121.923	12	121.923	0	121.923	0	121.923	6	121.923	13	102.311	154	162.221	56	102.311	11	102.311	14	101.758	1	101.758	34	101.758	28	101.758	6
121.93	0	121.93	0	121.93	2	121.93	3	121.93	0	121.93	0	121.93	0	121.93	11	121.93	0	121.93	0	121.93	4	121.93	2	102.317	162	162.229	68	102.317	40	102.317	6	101.764	0	101.764	17	101.764	27	101.764	18
121.937	0	121.937	1	121.937	10	121.937	13	121.937	0	121.937	0	121.937	0	121.937	8	121.937	0	121.937	0	121.937	3	121.937	15	102.324	101	162.237	45	102.324	33	102.324	2	101.771	10	101.771	12	101.771	22	101.771	18
121.944	0	121.944	0	121.944	15	121.944	16	121.944	0	121.944	0	121.944	0	121.944	10	121.944	0	121.944	0	121.944	14	121.944	10	102.33	70	162.246	20	102.33	7	102.33	10	101.777	4	101.777	35	101.777	16	101.777	5
121.951	1	121.951	0	121.951	13	121.951	12	121.951	0	121.951	0	121.951	0	121.951	10	121.951	0	121.951	0	121.951	4	121.951	3	102.337	77	162.254	7	102.337	1	102.337	10	101.784	0	101.784	22	101.784	28	101.784	29
121.958	0	121.958	1	121.958	22	121.958	13	121.958	0	121.958	0	121.958	0	121.958	29	121.958	0	121.958	0	121.958	16	121.958	3	102.343	73	162.262	28	102.343	7	102.343	4	101.79	0	101.79	15	101.79	26	101.79	36
121.965	7	121.965	3	121.965	24	121.965	13	121.965	0	121.965	0	121.965	0	121.965	18	121.965	0	121.965	0	121.965	7	121.965	4	102.35	61	162.27	21	102.35	4	102.35	7	101.796	0	101.796	10	101.796	50	101.796	12
121.973	1	121.973	1	121.973	8	121.973	2	121.973	0	121.973	0	121.973	0	121.973	19	121.973	0	121.973	0	121.973	2	121.973	13	102.356	117	162.278	31	102.356	11	102.356	6	101.803	0	101.803	19	101.803	44	101.803	32
121.98	0	121.98	6	121.98	4	121.98	3	121.98	0	121.98	0	121.98	0	121.98	19	121.98	0	121.98	0	121.98	9	121.98	8	102.363	125	162.286	51	102.363	11	102.363	7	101.809	0	101.809	27	101.809	23	101.809	28
121.987	1	121.987	6	121.987	1	121.987	10	121.987	0	121.987	0	121.987	0	121.987	24	121.987	0	121.987	1	121.987	3	121.987	12	102.369	172	162.295	35	102.369	24	102.369	1	101.816	0	101.816	12	101.816	36	101.816	16
121.994	2	121.994	1	121.994	5	121.994	5	121.994	0	121.994	0	121.994	0	121.994	36	121.994	0	121.994	1	121.994	5	121.994	6	102.376	165	162.303	45	102.376	12	102.376	3	101.822	7	101.822	21	101.822	33	101.822	5
122.001	0	122.001	0	122.001	10	122.001	7	122.001	0	122.001	0	122.001	0	122.001	46	122.001	0	122.001	0	122.001	1	122.001	4	102.382	94	162.311	62	102.382	9	102.382	18	101.829	14	101.829	16	101.829	20	101.829	0
122.008	0	122.008	0	122.008	13	122.008	9	122.008	0	122.008	1	122.008	0	122.008	78	122.008	0	122.008	0	122.008	2	122.008	1	102.389	86	162.319	37	102.389	34	102.389	18	101.835	1	101.835	16	101.835	32	101.835	0
122.015	0	122.015	0	122.015	3	122.015	4	122.015	0	122.015	0	122.015	0	122.015	87	122.015	0	122.015	0	122.015	10	122.015	8	102.395	86	162.327	25	102.395	43	102.395	32	101.842	1	101.842	31	101.842	30	101.842	0
122.022	4	122.022	0	122.022	14	122.022	5	122.022	0	122.022	0	122.022	0	122.022	51	122.022	0	122.022	0	122.022	3	122.022	1	102.402	143	162.336	60	102.402	13	102.402	48	101.848	0	101.848	21	101.848	19	101.848	4
122.029	1	122.029	2	122.029	16	122.029	12	122.029	3	122.029	0	122.029	3	122.029	23	122.029	0	122.029	0	122.029	1	122.029	0	102.408	225	162.344	65	102.408	2	102.408	38	101.855	0	101.855	13	101.855	11	101.855	18
122.037	0	122.037	2	122.037	8	122.037	4	122.037	0	122.037	0	122.037	0	122.037	11	122.037	0	122.037	0	122.037	0	122.037	5	102.415	138	162.352	25	102.415	4	102.415	39	101.861	0	101.861	18	101.861	7	101.861	6
122.044	7	122.044	2	122.044	2	122.044	2	122.044	0	122.044	0	122.044	0	122.044	9	122.044	0	122.044	0	122.044	0	122.044	0	102.422	84	162.36	10	102.422	9	102.422	16	101.868	0	101.868	28	101.868	7	101.868	19
122.051	5	122.051	0	122.051	5	122.051	1	122.051	0	122.051	0	122.051	0	122.051	15	122.051	0	122.051	0	122.051	2	122.051	1	102.428	150	162.368	10	102.428	13	102.428	17	101.874	3	101.874	31	101.874	6	101.874	23
122.058	0	122.058	3	122.058	9	122.058	0	122.058	0	122.058	0	122.058	0	122.058	8	122.058	0	122.058	0	122.058	2	122.058	9	102.435	111	162.376	28	102.435	3	102.435	29	101.881	5	101.881	15	101.881	1	101.881	6
122.065	0	122.065	1	122.065	4	122.065	7	122.065	0	122.065	0	122.065	0	122.065	0	122.065	0	122.065	0	122.065	5	122.065	15	102.441	50	162.385	9	102.441	2	102.441	58	101.887	7	101.887	6	101.887	2	101.887	7
122.072	3	122.072	5	122.072	7	122.072	0	122.072	0	122.072	0	122.072	0	122.072	8	122.072	0	122.072	0	122.072	3	122.072	4	102.448	64	162.393	5	102.448	1	102.448	59	101.894	2	101.894	0	101.894	12	101.894	2
122.079	3	122.079	0	122.079	0	122.079	1	122.079	0	122.079	0	122.079	0	122.079	3	122.079	0	122.079	0	122.079	5	122.079	1	102.454	100	162.401	0	102.454	19	102.454	52	101.9	0	101.9	0	101.9	24	101.9	11
122.086	1	122.086	0	122.086	3	122.086	1	122.086	0	122.086	0	122.086	0	122.086	0	122.086	0	122.086	0	122.086	7	122.086	0	102.461	107	162.409	0	102.461	17	102.461	40	101.906	1	101.906	27	101.906	38	101.906	13
122.093	0	122.093	0	122.093	0	122.093	0	122.093	0	122.093	0	122.093	0	122.093	0	122.093	0	122.093	0	122.093	3	122.093	0	102.467	87	162.417	0	102.467	9	102.467	16	101.913	13	101.913	19	101.913	37	101.913	3
122.101	0	122.101	0	122.101	0	122.101	11	122.101	0	122.101	0	122.101	0	122.101	2	122.101	0	122.101	0	122.101	1	122.101	2	102.474	67	162.425	0	102.474	6	102.474	15	101.919	4	101.919	14	101.919	46	101.919	3
122.108	0	122.108	4	122.108	2	122.108	8	122.108	1	122.108	0	122.108	0	122.108	0	122.108	0	122.108	0	122.108	0	122.108	4	102.48	47	162.434	0	102.48	0	102.48	53	101.926	3	101.926	6	101.926	33	101.926	42
122.115	0	122.115	0	122.115	0	122.115	3	122.115	1	122.115	0	122.115	0	122.115	0	122.115	0	122.115	0	122.115	1	122.115	4	102.487	96	162.442	0	102.487	4	102.487	37	101.932	0	101.932	0	101.932	20	101.932	24
122.122	0	122.122	1	122.122	3	122.122	0	122.122	0	122.122	0	122.122	0	122.122	2	122.122	0	122.122	0	122.122	0	122.122	7	102.493	98	162.45	0	102.493	1	102.493	22	101.939	0	101.939	15	101.939	14	101.939	14
122.129	0	122.129	1	122.129	0	122.129	0	122.129	0	122.129	0	122.129	0	122.129	1	122.129	0	122.129	0	122.129	0	122.129	0	102.5	92	162.458	0	102.5	0	102.5	21	101.945	1	101.945	45	101.945	17	101.945	5
122.136	0	122.136	0	122.136	0	122.136	1	122.136	0	122.136	0	122.136	0	122.136	2	122.136	0	122.136	0	122.136	2	122.136	4	102.506	74	162.466	0	102.506	0	102.506	21	101.952	5	101.952	70	101.952	16	101.952	5
122.143	0	122.143	0	122.143	1	122.143	0	122.143	0	122.143	0	122.143	0	122.143	1	122.143	0	122.143	0	122.143	0	122.143	2	102.513	67	162.474	0	102.513	0	102.513	23	101.958	2	101.958	29	101.958	16	101.958	12
122.15	0	122.15	3	122.15	0	122.15	0	122.15	0	122.15	0	122.15	0	122.15	0	122.15	0	122.15	0	122.15	2	122.15	14	102.519	79	162.483	0	102.519	0	102.519	18	101.965	1	101.965	19	101.965	9	101.965	2
122.157	0	122.157	0	122.157	0	122.157	4	122.157	0	122.157	0	122.157	0	122.157	1	122.157	0	122.157	0	122.157	1	122.157	4	102.526	138	162.491	0	102.526	7	102.526	27	101.971	20	101.971	25	101.971	7	101.971	8
122.165	0	122.165	0	122.165	0	122.165	3	122.165	0	122.165	0	122.165	0	122.165	0	122.165	0	122.165	0	122.165	0	122.165	3	102.532	126	162.499	4	102.532	6	102.532	42	101.978	5	101.978	12	101.978	15	101.978	19
122.172	0	122.172	2	122.172	0	122.172	0	122.172	0	122.172	0	122.172	0	122.172	1	122.172	0	122.172	0	122.172	0	122.172	3	102.539	133	162.507	0	102.539	0	102.539	35	101.984	3	101.984	15	101.984	28	101.984	14
122.179	0	122.179	8	122.179	0	122.179	2	122.179	0	122.179	0	122.179	0	122.179	3	122.179	0	122.179	0	122.179	1	122.179	1	102.546	85	162.515	0	102.546	13	102.546	56	101.991	0	101.991	18	101.991	22	101.991	2
122.186	0	122.186	0	122.186	6	122.186	7	122.186	0	122.186	0	122.186	0	122.186	3	122.186	0	122.186	0	122.186	3	122.186	5	102.552	72	162.524	0	102.552	7	102.552	30	101.997	0	101.997	39	101.997	23	101.997	1
122.193	0	122.193	3	122.193	0	122.193	1	122.193	0	122.193	0	122.193	0	122.193	2	122.193	0	122.193	0	122.193	5	122.193	15	102.559	96	162.532	0	102.559	0	102.559	27	102.004	0	102.004	30	102.004	61	102.004	7
122.2	0	122.2	0	122.2	6	122.2	3	122.2	0	122.2	0	122.2	0	122.2	5	122.2	1	122.2	0	122.2	0	122.2	1	102.565	68	162.54	13	102.565	20	102.565	16	102.01	4	102.01	37	102.01	72	102.01	14
122.207	0	122.207	1	122.207	9	122.207	1	122.207	0	122.207	0	122.207	0	122.207	0	122.207	0	122.207	0	122.207	0	122.207	12	102.572	50	162.548	2	102.572	36	102.572	37	102.017	7	102.017	23	102.017	47	102.017	10
122.214	0	122.214	4	122.214	11	122.214	1	122.214	0	122.214	0	122.214	0	122.214	1	122.214	0	122.214	0	122.214	3	122.214	9	102.578	66	162.556	0	102.578	31	102.578	53	102.023	0	102.023	25	102.023	34	102.023	8
122.221	0	122.221	2	122.221	2	122.221	1	122.221	0	122.221	0	122.221	0	122.221	4	122.221	0	122.221	0	122.221	3	122.221	1	102.585	109	162.564	0	102.585	7	102.585	50	102.029	0	102.029	15	102.029	35	102.029	13
122.229	0	122.229	0	122.229	1	122.229	4	122.229	0	122.229	0	122.229	0	122.229	3	122.229	0	122.229	0	122.229	0	122.229	0	102.591	95	162.573	11	102.591	33	102.591	100	102.036	10	102.036	15	102.036	27	102.036	31
122.236	0	122.236	5	122.236	2	122.236	4	122.236	0	122.236	0	122.236	0	122.236	3	122.236	0	122.236	0	122.236	3	122.236	11	102.598	83	162.581	4	102.598	49	102.598	160	102.042	7	102.042	57	102.042	18	102.042	10
122.243	0	122.243	1	122.243	3	122.243	1	122.243	0	122.243	0	122.243	0	122.243	2	122.243	0	122.243	0	122.243	1	122.243	12	102.604	111	162.589	0	102.604	33	102.604	247	102.049	23	102.049	48	102.049	24	102.049	6
122.25	0	122.25	3	122.25	1	122.25	0	122.25	0	122.25	0	122.25	0	122.25	6	122.25	0	122.25	0	122.25	2	122.25	3	102.611	176	162.597	0	102.611	33	102.611	391	102.055	10	102.055	81	102.055	16	102.055	5
122.257	0	122.257	0	122.257	0	122.257	2	122.257	0	122.257	0	122.257	0	122.257	7	122.257	0	122.257	0	122.257	1	122.257	1	102.617	193	162.605	0	102.617	47	102.617	435	102.062	3	102.062	116	102.062	19	102.062	1
122.264	0	122.264	0	122.264	0	122.264	2	122.264	0	122.264	0	122.264	0	122.264	1	122.264	0	122.264	0	122.264	0	122.264	5	102.624	173	162.614	0	102.624	81	102.624	500	102.068	2	102.068	65	102.068	37	102.068	2
122.271	0	122.271	0	122.271	4	122.271	1	122.271	0	122.271	0	122.271	0	122.271	2	122.271	0	122.271	0	122.271	9	122.271	5	102.63	100	162.622	14	102.63	101	102.63	707	102.075	0	102.075	38	102.075	45	102.075	2
122.278	5	122.278	8	122.278	1	122.278	0	122.278	0	122.278	0	122.278	0	122.278	0	122.278	0	122.278	0	122.278	2	122.278	0	102.637	114	162.63	5	102.637	134	102.637	760	102.081	5	102.081	18	102.081	45	102.081	0
122.286	0	122.286	5	122.286	1	122.286	0	122.286	0	122.286	0	122.286	0	122.286	0	122.286	0	122.286	0	122.286	0	122.286	2	102.644	119	162.638	0	102.644	138	102.644	717	102.088	10	102.088	31	102.088	30	102.088	0
122.293	0	122.293	0	122.293	6	122.293	8	122.293	0	122.293	0	122.293	0	122.293	0	122.293	0	122.293	0	122.293	1	122.293	2	102.65	52	162.646	0	102.65	160	102.65	679	102.094	1	102.094	17	102.094	40	102.094	6
122.3	0	122.3	0	122.3	2	122.3	4	122.3	0	122.3	0	122.3	0	122.3	6	122.3	0	122.3	0	122.3	2	122.3	1	102.657	60	162.654	0	102.657	155	102.657	765	102.101	0	102.101	13	102.101	27	102.101	25
122.307	0	122.307	0	122.307	0	122.307	4	122.307	0	122.307	0	122.307	0	122.307	8	122.307	0	122.307	0	122.307	3	122.307	5	102.663	61	162.663	0	102.663	114	102.663	796	102.107	0	102.107	9	102.107	24	102.107	8
122.314	0	122.314	3	122.314	2	122.314	6	122.314	0	122.314	0	122.314	0	122.314	1	122.314	0	122.314	0	122.314	0	122.314	14	102.67	57	162.671	17	102.67	82	102.67	668	102.114	5	102.114	16	102.114	35	102.114	3
122.321	0	122.321	0	122.321	3	122.321	0	122.321	0	122.321	0	122.321	0	122.321	2	122.321	0	122.321	0	122.321	0	122.321	2	102.676	53	162.679	19	102.676	107	102.676	744	102.12	17	102.12	17	102.12	48	102.12	0
122.328	0	122.328	0	122.328	1	122.328	0	122.328	0	122.328	0	122.328	0	122.328	5	122.328	0	122.328	0	122.328	0	122.328	0	102.683	53	162.687	5	102.683	80	102.683	875	102.127	5	102.127	10	102.127	31	102.127	13
122.335	0	122.335	0	122.335	2	122.335	6	122.335	0	122.335	0	122.335	0	122.335	0	122.335	0	122.335	0	122.335	2	122.335	0	102.689	91	162.695	2	102.689	66	102.689	800	102.133	0	102.133	29	102.133	17	102.133	14
122.342	0	122.342	0	122.342	2	122.342	3	122.342	0	122.342	0	122.342	0	122.342	0	122.342	0	122.342	0	122.342	0	122.342	0	102.696	103	162.704	0	102.696	96	102.696	704	102.14	0	102.14	32	102.14	16	102.14	12
122.35	0	122.35	0	122.35	2	122.35	0	122.35	0	122.35	0	122.35	0	122.35	0	122.35	0	122.35	0	122.35	0	122.35	1	102.702	113	162.712	0	102.702	86	102.702	629	102.146	0	102.146	18	102.146	31	102.146	14
122.357	2	122.357	5	122.357	0	122.357	1	122.357	0	122.357	0	122.357	0	122.357	0	122.357	0	122.357	0	122.357	0	122.357	0	102.709	76	162.72	0	102.709	53	102.709	478	102.153	0	102.153	20	102.153	25	102.153	23
122.364	3	122.364	5	122.364	0	122.364	3	122.364	0	122.364	0	122.364	0	122.364	0	122.364	0	122.364	0	122.364	0	122.364	5	102.715	80	162.728	0	102.715	30	102.715	411	102.159	0	102.159	15	102.159	12	102.159	25
122.371	0	122.371	1	122.371	0	122.371	2	122.371	0	122.371	0	122.371	0	122.371	0	122.371	0	122.371	0	122.371	0	122.371	1	102.722	89	162.736	0	102.722	22	102.722	289	102.166	8	102.166	19	102.166	14	102.166	42
122.378	0	122.378	3	122.378	4	122.378	1	122.378	0	122.378	0	122.378	0	122.378	0	122.378	0	122.378	0	122.378	0	122.378	1	102.728	63	162.744	7	102.728	50	102.728	290	102.172	29	102.172	16	102.172	39	102.172	43
122.385	0	122.385	2	122.385	4	122.385	1	122.385	0	122.385	0	122.385	0	122.385	2	122.385	0	122.385	0	122.385	0	122.385	5	102.735	40	162.753	0	102.735	84	102.735	189	102.179	18	102.179	19	102.179	39	102.179	34
122.392	0	122.392	3	122.392	3	122.392	0	122.392	0	122.392	0	122.392	0	122.392	0	122.392	0	122.392	0	122.392	1	122.392	8	102.742	22	162.761	1	102.742	66	102.742	75	102.185	6	102.185	8	102.185	35	102.185	33
122.399	0	122.399	0	122.399	5	122.399	0	122.399	0	122.399	0	122.399	0	122.399	2	122.399	0	122.399	0	122.399	0	122.399	4	102.748	63	162.769	1	102.748	57	102.748	47	102.191	35	102.191	64	102.191	29	102.191	23
122.407	0	122.407	0	122.407	0	122.407	0	122.407	0	122.407	0	122.407	0	122.407	0	122.407	0	122.407	0	122.407	1	122.407	9	102.755	114	162.777	0	102.755	90	102.755	37	102.198	29	102.198	23	102.198	16	102.198	45
122.414	0	122.414	0	122.414	0	122.414	10	122.414	0	122.414	0	122.414	0	122.414	3	122.414	0	122.414	0	122.414	0	122.414	1	102.761	80	162.785	0	102.761	38	102.761	31	102.204	12	102.204	20	102.204	10	102.204	37
122.421	0	122.421	0	122.421	0	122.421	1	122.421	0	122.421	0	122.421	0	122.421	0	122.421	0	122.421	0	122.421	6	122.421	0	102.768	106	162.794	0	102.768	17	102.768	25	102.211	26	102.211	17	102.211	14	102.211	47
122.428	0	122.428	2	122.428	0	122.428	1	122.428	0	122.428	0	122.428	0	122.428	0	122.428	0	122.428	0	122.428	4	122.428	0	102.774	133	162.802	1	102.774	13	102.774	28	102.217	11	102.217	28	102.217	37	102.217	61
122.435	0	122.435	2	122.435	0	122.435	4	122.435	0	122.435	0	122.435	0	122.435	0	122.435	0	122.435	0	122.435	1	122.435	5	102.781	91	162.81	2	102.781	13	102.781	26	102.224	1	102.224	9	102.224	41	102.224	74
122.442	0	122.442	1	122.442	0	122.442	0	122.442	0	122.442	0	122.442	0	122.442	2	122.442	0	122.442	0	122.442	1	122.442	10	102.787	93	162.818	9	102.787	35	102.787	26	102.23	0	102.23	5	102.23	24	102.23	75
122.449	0	122.449	0	122.449	1	122.449	0	122.449	0	122.449	0	122.449	0	122.449	0	122.449	0	122.449	0	122.449	0	122.449	4	102.794	76	162.826	31	102.794	33	102.794	33	102.237	0	102.237	0	102.237	25	102.237	60
122.456	0	122.456	3	122.456	0	122.456	1	122.456	0	122.456	0	122.456	0	122.456	0	122.456	0	122.456	0	122.456	1	122.456	3	102.8	80	162.835	11	102.8	28	102.8	37	102.243	35	102.243	17	102.243	35	102.243	58
122.464	0	122.464	0	122.464	0	122.464	0	122.464	0	122.464	0	122.464	0	122.464	0	122.464	0	122.464	0	122.464	4	122.464	1	102.807	53	162.843	1	102.807	34	102.807	105	102.25	71	102.25	16	102.25	27	102.25	30
122.471	0	122.471	0	122.471	0	122.471	0	122.471	0	122.471	0	122.471	0	122.471	4	122.471	0	122.471	0	122.471	10	122.471	1	102.813	66	162.851	2	102.813	14	102.813	84	102.256	32	102.256	30	102.256	84	102.256	40
122.478	0	122.478	3	122.478	0	122.478	1	122.478	0	122.478	0	122.478	0	122.478	2	122.478	0	122.478	0	122.478	4	122.478	6	102.82	73	162.859	1	102.82	6	102.82	94	102.263	12	102.263	11	102.263	75	102.263	45
122.485	0	122.485	1	122.485	0	122.485	0	122.485	0	122.485	0	122.485	0	122.485	2	122.485	0	122.485	0	122.485	1	122.485	5	102.827	67	162.867	1	102.827	13	102.827	59	102.269	2	102.269	20	102.269	55	102.269	81
122.492	0	122.492	2	122.492	0	122.492	0	122.492	0	122.492	0	122.492	0	122.492	1	122.492	0	122.492	0	122.492	1	122.492	2	102.833	101	162.875	0	102.833	10	102.833	24	102.276	15	102.276	58	102.276	59	102.276	67
122.499	0	122.499	5	122.499	2	122.499	1	122.499	0	122.499	0	122.499	0	122.499	1	122.499	0	122.499	0	122.499	0	122.499	2	102.84	148	162.884	0	102.84	8	102.84	38	102.282	11	102.282	85	102.282	49	102.282	51
122.506	0	122.506	0	122.506	1	122.506	0	122.506	0	122.506	0	122.506	0	122.506	0	122.506	0	122.506	0	122.506	0	122.506	0	102.846	65	162.892	0	102.846	0	102.846	36	102.289	12	102.289	34	102.289	60	102.289	22
122.513	0	122.513	0	122.513	15	122.513	5	122.513	0	122.513	0	122.513	0	122.513	1	122.513	0	122.513	0	122.513	2	122.513	0	102.853	40	162.9	0	102.853	4	102.853	24	102.295	3	102.295	35	102.295	62	102.295	17
122.521	0	122.521	0	122.521	3	122.521	0	122.521	0	122.521	0	122.521	0	122.521	0	122.521	0	122.521	0	122.521	1	122.521	0	102.859	91	162.908	0	102.859	12	102.859	28	102.302	9	102.302	51	102.302	52	102.302	15
122.528	0	122.528	0	122.528	0	122.528	2	122.528	0	122.528	0	122.528	0	122.528	3	122.528	0	122.528	0	122.528	2	122.528	1	102.866	118	162.916	4	102.866	2	102.866	16	102.308	42	102.308	61	102.308	43	102.308	17
122.535	0	122.535	0	122.535	0	122.535	0	122.535	0	122.535	0	122.535	0	122.535	0	122.535	0	122.535	0	122.535	1	122.535	0	102.872	165	162.925	0	102.872	24	102.872	39	102.315	21	102.315	43	102.315	30	102.315	1
122.542	0	122.542	7	122.542	1	122.542	0	122.542	0	122.542	0	122.542	0	122.542	0	122.542	0	122.542	0	122.542	0	122.542	1	102.879	190	162.933	0	102.879	15	102.879	49	102.321	5	102.321	11	102.321	23	102.321	27
122.549	0	122.549	5	122.549	2	122.549	0	122.549	0	122.549	0	122.549	0	122.549	4	122.549	0	122.549	0	122.549	4	122.549	2	102.885	161	162.941	2	102.885	3	102.885	24	102.328	0	102.328	4	102.328	41	102.328	29
122.556	0	122.556	9	122.556	1	122.556	2	122.556	0	122.556	0	122.556	0	122.556	5	122.556	0	122.556	0	122.556	1	122.556	0	102.892	118	162.949	2	102.892	16	102.892	17	102.334	0	102.334	24	102.334	52	102.334	16
122.563	0	122.563	6	122.563	1	122.563	1	122.563	0	122.563	0	122.563	0	122.563	0	122.563	0	122.563	0	122.563	1	122.563	2	102.899	77	162.957	0	102.899	23	102.899	29	102.341	0	102.341	15	102.341	37	102.341	18
122.57	1	122.57	0	122.57	3	122.57	2	122.57	0	122.57	0	122.57	0	122.57	0	122.57	0	122.57	0	122.57	0	122.57	5	102.905	52	162.966	12	102.905	11	102.905	33	102.347	0	102.347	14	102.347	53	102.347	4
122.578	0	122.578	0	122.578	0	122.578	1	122.578	0	122.578	0	122.578	0	122.578	0	122.578	0	122.578	0	122.578	3	122.578	0	102.912	72	162.974	6	102.912	22	102.912	25	102.354	0	102.354	44	102.354	47	102.354	0
122.585	0	122.585	2	122.585	0	122.585	0	122.585	0	122.585	0	122.585	0	122.585	0	122.585	0	122.585	0	122.585	2	122.585	0	102.918	137	162.982	3	102.918	25	102.918	8	102.36	0	102.36	15	102.36	52	102.36	0
122.592	0	122.592	1	122.592	9	122.592	1	122.592	0	122.592	0	122.592	0	122.592	0	122.592	0	122.592	0	122.592	0	122.592	3	102.925	139	162.99	0	102.925	19	102.925	5	102.367	0	102.367	10	102.367	70	102.367	11
122.599	0	122.599	3	122.599	7	122.599	2	122.599	0	122.599	0	122.599	0	122.599	0	122.599	0	122.599	0	122.599	9	122.599	3	102.931	86	162.998	6	102.931	21	102.931	45	102.373	0	102.373	12	102.373	68	102.373	10
122.606	0	122.606	3	122.606	0	122.606	5	122.606	0	122.606	0	122.606	0	122.606	2	122.606	0	122.606	0	122.606	5	122.606	0	102.938	83	163.006	70	102.938	50	102.938	26	102.38	0	102.38	20	102.38	58	102.38	4
122.613	0	122.613	1	122.613	0	122.613	3	122.613	0	122.613	0	122.613	0	122.613	0	122.613	0	122.613	0	122.613	2	122.613	0	102.944	97	163.015	37	102.944	34	102.944	23	102.386	0	102.386	15	102.386	46	102.386	11
122.62	0	122.62	0	122.62	0	122.62	3	122.62	0	122.62	0	122.62	0	122.62	0	122.62	0	122.62	0	122.62	1	122.62	1	102.951	130	163.023	13	102.951	28	102.951	47	102.393	5	102.393	32	102.393	26	102.393	9
122.627	0	122.627	0	122.627	0	122.627	8	122.627	0	122.627	0	122.627	0	122.627	0	122.627	0	122.627	0	122.627	4	122.627	2	102.957	99	163.031	6	102.957	23	102.957	61	102.399	15	102.399	14	102.399	21	102.399	10
122.635	0	122.635	0	122.635	0	122.635	2	122.635	0	122.635	0	122.635	0	122.635	1	122.635	0	122.635	0	122.635	4	122.635	1	102.964	87	163.039	3	102.964	26	102.964	32	102.406	12	102.406	4	102.406	25	102.406	7
122.642	0	122.642	0	122.642	0	122.642	1	122.642	0	122.642	0	122.642	0	122.642	0	122.642	0	122.642	0	122.642	4	122.642	3	102.97	70	163.047	2	102.97	43	102.97	12	102.412	2	102.412	1	102.412	19	102.412	10
122.649	0	122.649	0	122.649	0	122.649	0	122.649	0	122.649	0	122.649	0	122.649	2	122.649	0	122.649	0	122.649	0	122.649	0	102.977	77	163.056	0	102.977	67	102.977	42	102.419	0	102.419	30	102.419	42	102.419	1
122.656	0	122.656	0	122.656	1	122.656	0	122.656	0	122.656	0	122.656	0	122.656	1	122.656	0	122.656	0	122.656	0	122.656	0	102.984	77	163.064	0	102.984	61	102.984	45	102.425	0	102.425	90	102.425	52	102.425	0
122.663	0	122.663	0	122.663	0	122.663	3	122.663	0	122.663	0	122.663	0	122.663	3	122.663	0	122.663	0	122.663	1	122.663	1	102.99	74	163.072	0	102.99	13	102.99	38	102.431	8	102.431	46	102.431	48	102.431	3
122.67	0	122.67	0	122.67	0	122.67	3	122.67	0	122.67	0	122.67	0	122.67	5	122.67	3	122.67	0	122.67	3	122.67	6	102.997	83	163.08	0	102.997	24	102.997	44	102.438	4	102.438	14	102.438	51	102.438	6
122.677	0	122.677	0	122.677	0	122.677	0	122.677	0	122.677	0	122.677	0	122.677	0	122.677	3	122.677	0	122.677	4	122.677	0	103.003	98	163.088	18	103.003	15	103.003	28	102.444	30	102.444	12	102.444	37	102.444	0
122.684	0	122.684	0	122.684	0	122.684	0	122.684	0	122.684	0	122.684	0	122.684	0	122.684	0	122.684	0	122.684	0	122.684	6	103.01	65	163.097	8	103.01	5	103.01	32	102.451	19	102.451	24	102.451	35	102.451	11
122.692	0	122.692	0	122.692	0	122.692	0	122.692	0	122.692	0	122.692	0	122.692	0	122.692	0	122.692	0	122.692	0	122.692	1	103.016	62	163.105	6	103.016	3	103.016	34	102.457	6	102.457	17	102.457	32	102.457	3
122.699	0	122.699	0	122.699	0	122.699	2	122.699	0	122.699	0	122.699	0	122.699	0	122.699	0	122.699	0	122.699	1	122.699	0	103.023	63	163.113	0	103.023	1	103.023	51	102.464	6	102.464	22	102.464	52	102.464	0
122.706	0	122.706	0	122.706	0	122.706	0	122.706	0	122.706	0	122.706	0	122.706	1	122.706	0	122.706	0	122.706	0	122.706	0	103.029	96	163.121	0	103.029	4	103.029	117	102.47	2	102.47	43	102.47	40	102.47	10
122.713	0	122.713	0	122.713	0	122.713	1	122.713	0	122.713	0	122.713	0	122.713	0	122.713	0	122.713	0	122.713	0	122.713	1	103.036	77	163.129	17	103.036	5	103.036	91	102.477	0	102.477	11	102.477	37	102.477	39
122.72	0	122.72	0	122.72	1	122.72	1	122.72	0	122.72	0	122.72	0	122.72	1	122.72	0	122.72	0	122.72	0	122.72	1	103.042	66	163.138	22	103.042	5	103.042	61	102.483	0	102.483	2	102.483	67	102.483	25
122.727	0	122.727	0	122.727	4	122.727	0	122.727	0	122.727	0	122.727	0	122.727	2	122.727	0	122.727	0	122.727	5	122.727	0	103.049	76	163.146	10	103.049	14	103.049	36	102.49	11	102.49	0	102.49	55	102.49	8
122.734	0	122.734	0	122.734	0	122.734	0	122.734	0	122.734	0	122.734	0	122.734	0	122.734	0	122.734	0	122.734	4	122.734	5	103.056	100	163.154	8	103.056	7	103.056	20	102.496	23	102.496	6	102.496	35	102.496	7
122.741	0	122.741	0	122.741	0	122.741	5	122.741	0	122.741	0	122.741	0	122.741	0	122.741	0	122.741	0	122.741	3	122.741	4	103.062	68	163.162	16	103.062	4	103.062	9	102.503	7	102.503	1	102.503	20	102.503	25
122.749	0	122.749	1	122.749	0	122.749	8	122.749	0	122.749	0	122.749	0	122.749	3	122.749	0	122.749	0	122.749	0	122.749	6	103.069	47	163.17	17	103.069	9	103.069	24	102.509	3	102.509	5	102.509	14	102.509	14
122.756	0	122.756	4	122.756	0	122.756	4	122.756	0	122.756	0	122.756	0	122.756	0	122.756	0	122.756	0	122.756	2	122.756	1	103.075	70	163.179	15	103.075	4	103.075	63	102.516	0	102.516	5	102.516	11	102.516	7
122.763	0	122.763	3	122.763	0	122.763	6	122.763	0	122.763	0	122.763	0	122.763	1	122.763	0	122.763	0	122.763	1	122.763	0	103.082	65	163.187	53	103.082	6	103.082	34	102.522	3	102.522	0	102.522	11	102.522	3
122.77	0	122.77	2	122.77	0	122.77	6	122.77	0	122.77	0	122.77	0	122.77	3	122.77	0	122.77	0	122.77	7	122.77	0	103.088	51	163.195	89	103.088	12	103.088	23	102.529	1	102.529	0	102.529	22	102.529	1
122.777	0	122.777	0	122.777	1	122.777	0	122.777	0	122.777	0	122.777	0	122.777	12	122.777	0	122.777	0	122.777	12	122.777	2	103.095	80	163.203	128	103.095	8	103.095	7	102.535	0	102.535	35	102.535	34	102.535	7
122.784	0	122.784	3	122.784	3	122.784	0	122.784	0	122.784	0	122.784	0	122.784	23	122.784	0	122.784	0	122.784	3	122.784	5	103.101	169	163.211	192	103.101	4	103.101	10	102.542	0	102.542	48	102.542	44	102.542	4
122.791	0	122.791	2	122.791	1	122.791	2	122.791	0	122.791	0	122.791	0	122.791	37	122.791	0	122.791	0	122.791	6	122.791	1	103.108	160	163.22	115	103.108	15	103.108	16	102.548	0	102.548	30	102.548	69	102.548	0
122.799	3	122.799	0	122.799	0	122.799	0	122.799	0	122.799	0	122.799	0	122.799	47	122.799	0	122.799	0	122.799	4	122.799	0	103.115	171	163.228	88	103.115	21	103.115	62	102.555	0	102.555	19	102.555	47	102.555	0
122.806	0	122.806	0	122.806	1	122.806	0	122.806	0	122.806	0	122.806	0	122.806	60	122.806	0	122.806	0	122.806	4	122.806	2	103.121	202	163.236	112	103.121	29	103.121	53	102.561	0	102.561	11	102.561	38	102.561	7
122.813	0	122.813	0	122.813	4	122.813	3	122.813	0	122.813	0	122.813	0	122.813	65	122.813	0	122.813	0	122.813	7	122.813	0	103.128	113	163.244	126	103.128	10	103.128	31	102.568	0	102.568	32	102.568	26	102.568	3
122.82	0	122.82	3	122.82	5	122.82	6	122.82	0	122.82	0	122.82	0	122.82	107	122.82	0	122.82	0	122.82	5	122.82	1	103.134	58	163.252	128	103.134	5	103.134	26	102.574	0	102.574	44	102.574	17	102.574	8
122.827	0	122.827	1	122.827	8	122.827	3	122.827	0	122.827	0	122.827	0	122.827	192	122.827	0	122.827	0	122.827	7	122.827	2	103.141	52	163.26	62	103.141	3	103.141	46	102.581	0	102.581	38	102.581	24	102.581	21
122.834	0	122.834	1	122.834	6	122.834	2	122.834	0	122.834	0	122.834	0	122.834	313	122.834	0	122.834	0	122.834	15	122.834	6	103.147	67	163.269	22	103.147	2	103.147	25	102.587	0	102.587	15	102.587	27	102.587	35
122.841	0	122.841	0	122.841	3	122.841	1	122.841	0	122.841	0	122.841	0	122.841	296	122.841	0	122.841	0	122.841	22	122.841	15	103.154	87	163.277	5	103.154	10	103.154	16	102.594	0	102.594	31	102.594	27	102.594	24
122.848	0	122.848	0	122.848	19	122.848	4	122.848	0	122.848	0	122.848	0	122.848	285	122.848	0	122.848	0	122.848	14	122.848	25	103.16	97	163.285	23	103.16	2	103.16	8	102.6	7	102.6	28	102.6	16	102.6	9
122.856	0	122.856	5	122.856	22	122.856	14	122.856	0	122.856	0	122.856	0	122.856	343	122.856	0	122.856	0	122.856	12	122.856	19	103.167	117	163.293	36	103.167	40	103.167	7	102.607	3	102.607	4	102.607	11	102.607	3
122.863	0	122.863	1	122.863	26	122.863	21	122.863	0	122.863	0	122.863	0	122.863	357	122.863	0	122.863	0	122.863	22	122.863	5	103.173	88	163.301	60	103.173	54	103.173	17	102.613	3	102.613	23	102.613	14	102.613	18
122.87	0	122.87	0	122.87	51	122.87	36	122.87	0	122.87	0	122.87	0	122.87	330	122.87	0	122.87	3	122.87	20	122.87	13	103.18	122	163.31	32	103.18	19	103.18	26	102.62	1	102.62	24	102.62	69	102.62	13
122.877	0	122.877	0	122.877	62	122.877	27	122.877	0	122.877	0	122.877	0	122.877	374	122.877	0	122.877	0	122.877	30	122.877	14	103.187	153	163.318	8	103.187	6	103.187	28	102.626	17	102.626	12	102.626	103	102.626	3
122.884	0	122.884	11	122.884	45	122.884	23	122.884	0	122.884	0	122.884	0	122.884	382	122.884	0	122.884	1	122.884	23	122.884	23	103.193	116	163.326	29	103.193	8	103.193	17	102.633	12	102.633	13	102.633	83	102.633	0
122.891	0	122.891	8	122.891	33	122.891	36	122.891	0	122.891	0	122.891	0	122.891	305	122.891	0	122.891	0	122.891	14	122.891	14	103.2	80	163.334	22	103.2	19	103.2	3	102.639	1	102.639	3	102.639	43	102.639	0
122.898	2	122.898	14	122.898	45	122.898	32	122.898	0	122.898	0	122.898	0	122.898	266	122.898	0	122.898	0	122.898	12	122.898	15	103.206	121	163.342	19	103.206	1	103.206	14	102.646	0	102.646	11	102.646	27	102.646	0
122.906	0	122.906	3	122.906	47	122.906	26	122.906	0	122.906	0	122.906	0	122.906	275	122.906	0	122.906	3	122.906	12	122.906	34	103.213	117	163.351	24	103.213	5	103.213	5	102.652	0	102.652	25	102.652	18	102.652	0
122.913	0	122.913	6	122.913	35	122.913	20	122.913	0	122.913	0	122.913	0	122.913	229	122.913	0	122.913	12	122.913	16	122.913	16	103.219	106	163.359	19	103.219	2	103.219	15	102.659	0	102.659	23	102.659	15	102.659	0
122.92	7	122.92	9	122.92	31	122.92	43	122.92	0	122.92	0	122.92	0	122.92	158	122.92	0	122.92	4	122.92	11	122.92	10	103.226	123	163.367	20	103.226	9	103.226	10	102.665	0	102.665	28	102.665	9	102.665	0
122.927	11	122.927	5	122.927	20	122.927	29	122.927	0	122.927	0	122.927	0	122.927	144	122.927	0	122.927	0	122.927	13	122.927	3	103.232	97	163.375	8	103.232	15	103.232	38	102.672	5	102.672	39	102.672	8	102.672	11
122.934	7	122.934	2	122.934	31	122.934	25	122.934	0	122.934	0	122.934	0	122.934	155	122.934	0	122.934	0	122.934	7	122.934	6	103.239	115	163.383	23	103.239	27	103.239	55	102.678	10	102.678	20	102.678	5	102.678	16
122.941	6	122.941	2	122.941	22	122.941	16	122.941	0	122.941	0	122.941	0	122.941	138	122.941	0	122.941	0	122.941	5	122.941	15	103.246	101	163.392	6	103.246	20	103.246	35	102.685	4	102.685	39	102.685	5	102.685	9
122.948	2	122.948	3	122.948	15	122.948	17	122.948	0	122.948	0	122.948	0	122.948	87	122.948	0	122.948	0	122.948	14	122.948	11	103.252	64	163.4	32	103.252	22	103.252	20	102.691	0	102.691	24	102.691	3	102.691	29
122.955	2	122.955	8	122.955	30	122.955	17	122.955	0	122.955	0	122.955	0	122.955	60	122.955	0	122.955	0	122.955	15	122.955	4	103.259	77	163.408	47	103.259	69	103.259	13	102.698	12	102.698	11	102.698	3	102.698	48
122.963	0	122.963	12	122.963	8	122.963	10	122.963	1	122.963	0	122.963	0	122.963	35	122.963	0	122.963	0	122.963	11	122.963	12	103.265	63	163.416	17	103.265	59	103.265	17	102.704	23	102.704	22	102.704	25	102.704	23
122.97	0	122.97	3	122.97	8	122.97	6	122.97	0	122.97	0	122.97	0	122.97	36	122.97	0	122.97	0	122.97	8	122.97	8	103.272	70	163.424	2	103.272	53	103.272	14	102.711	7	102.711	74	102.711	22	102.711	35
122.977	6	122.977	1	122.977	17	122.977	11	122.977	0	122.977	0	122.977	0	122.977	41	122.977	0	122.977	1	122.977	7	122.977	3	103.278	87	163.433	0	103.278	41	103.278	22	102.717	1	102.717	44	102.717	33	102.717	19
122.984	1	122.984	6	122.984	8	122.984	20	122.984	0	122.984	0	122.984	0	122.984	24	122.984	0	122.984	0	122.984	9	122.984	12	103.285	74	163.441	0	103.285	17	103.285	23	102.724	0	102.724	19	102.724	26	102.724	18
122.991	1	122.991	5	122.991	14	122.991	12	122.991	0	122.991	0	122.991	0	122.991	23	122.991	0	122.991	0	122.991	5	122.991	30	103.291	44	163.449	1	103.291	11	103.291	17	102.73	0	102.73	13	102.73	18	102.73	6
122.998	0	122.998	3	122.998	22	122.998	13	122.998	0	122.998	0	122.998	0	122.998	13	122.998	0	122.998	0	122.998	20	122.998	22	103.298	56	163.457	0	103.298	13	103.298	3	102.737	0	102.737	50	102.737	31	102.737	7
123.005	0	123.005	2	123.005	6	123.005	13	123.005	0	123.005	0	123.005	0	123.005	19	123.005	0	123.005	1	123.005	15	123.005	8	103.305	75	163.465	3	103.305	21	103.305	9	102.743	0	102.743	21	102.743	44	102.743	0
123.013	0	123.013	0	123.013	4	123.013	6	123.013	0	123.013	0	123.013	0	123.013	20	123.013	0	123.013	1	123.013	8	123.013	2	103.311	106	163.474	0	103.311	8	103.311	20	102.75	0	102.75	12	102.75	48	102.75	0
123.02	6	123.02	0	123.02	9	123.02	10	123.02	0	123.02	0	123.02	0	123.02	6	123.02	0	123.02	0	123.02	4	123.02	3	103.318	97	163.482	0	103.318	1	103.318	11	102.756	1	102.756	3	102.756	28	102.756	0
123.027	1	123.027	0	123.027	1	123.027	12	123.027	0	123.027	0	123.027	0	123.027	12	123.027	0	123.027	0	123.027	2	123.027	9	103.324	151	163.49	0	103.324	12	103.324	31	102.763	18	102.763	20	102.763	18	102.763	2
123.034	0	123.034	1	123.034	4	123.034	12	123.034	0	123.034	0	123.034	0	123.034	2	123.034	0	123.034	0	123.034	1	123.034	3	103.331	172	163.498	12	103.331	25	103.331	26	102.769	12	102.769	23	102.769	11	102.769	0
123.041	0	123.041	1	123.041	6	123.041	12	123.041	0	123.041	0	123.041	0	123.041	6	123.041	0	123.041	0	123.041	0	123.041	5	103.337	83	163.507	3	103.337	30	103.337	8	102.776	4	102.776	30	102.776	8	102.776	9
123.048	0	123.048	5	123.048	2	123.048	6	123.048	0	123.048	0	123.048	0	123.048	5	123.048	0	123.048	0	123.048	2	123.048	3	103.344	116	163.515	0	103.344	33	103.344	6	102.782	11	102.782	23	102.782	8	102.782	1
123.055	7	123.055	2	123.055	10	123.055	4	123.055	0	123.055	0	123.055	0	123.055	4	123.055	0	123.055	0	123.055	6	123.055	7	103.35	156	163.523	0	103.35	18	103.35	10	102.789	1	102.789	18	102.789	8	102.789	18
123.063	3	123.063	1	123.063	6	123.063	3	123.063	0	123.063	0	123.063	0	123.063	3	123.063	0	123.063	0	123.063	2	123.063	4	103.357	135	163.531	0	103.357	3	103.357	21	102.795	1	102.795	15	102.795	4	102.795	9
123.07	3	123.07	1	123.07	1	123.07	4	123.07	1	123.07	0	123.07	0	123.07	3	123.07	0	123.07	0	123.07	6	123.07	5	103.364	117	163.539	0	103.364	24	103.364	7	102.802	0	102.802	7	102.802	13	102.802	3
123.077	1	123.077	1	123.077	0	123.077	4	123.077	0	123.077	0	123.077	0	123.077	8	123.077	0	123.077	0	123.077	1	123.077	4	103.37	83	163.548	0	103.37	45	103.37	15	102.808	0	102.808	29	102.808	9	102.808	26
123.084	1	123.084	0	123.084	6	123.084	6	123.084	0	123.084	0	123.084	0	123.084	6	123.084	0	123.084	0	123.084	1	123.084	2	103.377	70	163.556	0	103.377	25	103.377	10	102.815	0	102.815	25	102.815	17	102.815	11
123.091	3	123.091	0	123.091	13	123.091	0	123.091	0	123.091	0	123.091	0	123.091	1	123.091	0	123.091	0	123.091	1	123.091	2	103.383	79	163.564	1	103.383	11	103.383	19	102.821	0	102.821	30	102.821	6	102.821	9
123.098	0	123.098	0	123.098	6	123.098	2	123.098	0	123.098	0	123.098	0	123.098	3	123.098	0	123.098	0	123.098	3	123.098	4	103.39	74	163.572	21	103.39	4	103.39	46	102.828	0	102.828	8	102.828	3	102.828	7
123.105	1	123.105	0	123.105	0	123.105	0	123.105	0	123.105	0	123.105	0	123.105	11	123.105	0	123.105	0	123.105	4	123.105	1	103.396	58	163.58	24	103.396	0	103.396	51	102.834	41	102.834	0	102.834	1	102.834	2
123.113	4	123.113	1	123.113	0	123.113	2	123.113	0	123.113	0	123.113	0	123.113	16	123.113	0	123.113	0	123.113	0	123.113	0	103.403	42	163.589	11	103.403	0	103.403	42	102.841	21	102.841	8	102.841	0	102.841	2
123.12	1	123.12	8	123.12	0	123.12	7	123.12	2	123.12	0	123.12	0	123.12	9	123.12	0	123.12	0	123.12	1	123.12	2	103.409	83	163.597	1	103.409	2	103.409	44	102.847	4	102.847	5	102.847	0	102.847	0
123.127	0	123.127	4	123.127	0	123.127	5	123.127	0	123.127	0	123.127	0	123.127	3	123.127	0	123.127	0	123.127	0	123.127	9	103.416	67	163.605	4	103.416	6	103.416	40	102.854	0	102.854	10	102.854	1	102.854	0
123.134	1	123.134	0	123.134	0	123.134	1	123.134	0	123.134	0	123.134	0	123.134	2	123.134	0	123.134	0	123.134	4	123.134	8	103.423	60	163.613	0	103.423	3	103.423	49	102.86	9	102.86	10	102.86	1	102.86	0
123.141	2	123.141	0	123.141	3	123.141	0	123.141	0	123.141	0	123.141	0	123.141	0	123.141	0	123.141	0	123.141	2	123.141	5	103.429	105	163.621	0	103.429	6	103.429	38	102.867	3	102.867	10	102.867	0	102.867	0
123.148	0	123.148	0	123.148	0	123.148	1	123.148	0	123.148	0	123.148	0	123.148	1	123.148	0	123.148	0	123.148	1	123.148	6	103.436	153	163.63	6	103.436	3	103.436	40	102.873	0	102.873	1	102.873	24	102.873	5
123.155	0	123.155	1	123.155	0	123.155	0	123.155	0	123.155	0	123.155	0	123.155	0	123.155	0	123.155	0	123.155	2	123.155	2	103.442	100	163.638	10	103.442	6	103.442	42	102.88	0	102.88	34	102.88	15	102.88	6
123.163	0	123.163	0	123.163	0	123.163	0	123.163	0	123.163	0	123.163	0	123.163	1	123.163	0	123.163	0	123.163	6	123.163	5	103.449	93	163.646	8	103.449	15	103.449	13	102.886	1	102.886	27	102.886	16	102.886	11
123.17	0	123.17	1	123.17	0	123.17	1	123.17	0	123.17	0	123.17	0	123.17	5	123.17	0	123.17	0	123.17	2	123.17	6	103.455	115	163.654	1	103.455	4	103.455	13	102.893	11	102.893	16	102.893	38	102.893	9
123.177	0	123.177	0	123.177	0	123.177	0	123.177	0	123.177	0	123.177	0	123.177	8	123.177	0	123.177	0	123.177	0	123.177	0	103.462	84	163.662	21	103.462	12	103.462	22	102.899	3	102.899	40	102.899	25	102.899	1
123.184	0	123.184	0	123.184	0	123.184	0	123.184	0	123.184	0	123.184	0	123.184	1	123.184	0	123.184	0	123.184	4	123.184	4	103.468	42	163.671	13	103.468	4	103.468	40	102.906	0	102.906	23	102.906	24	102.906	10
123.191	0	123.191	1	123.191	0	123.191	0	123.191	0	123.191	0	123.191	0	123.191	2	123.191	0	123.191	0	123.191	2	123.191	4	103.475	83	163.679	4	103.475	44	103.475	18	102.912	14	102.912	24	102.912	22	102.912	4
123.198	0	123.198	0	123.198	2	123.198	6	123.198	0	123.198	0	123.198	0	123.198	2	123.198	0	123.198	0	123.198	1	123.198	6	103.482	84	163.687	0	103.482	38	103.482	13	102.919	22	102.919	38	102.919	10	102.919	7
123.205	0	123.205	0	123.205	2	123.205	4	123.205	0	123.205	0	123.205	0	123.205	0	123.205	0	123.205	0	123.205	1	123.205	0	103.488	70	163.695	0	103.488	8	103.488	9	102.925	20	102.925	25	102.925	5	102.925	1
123.213	0	123.213	0	123.213	2	123.213	0	123.213	0	123.213	0	123.213	0	123.213	7	123.213	0	123.213	0	123.213	1	123.213	1	103.495	124	163.703	0	103.495	8	103.495	15	102.932	5	102.932	8	102.932	4	102.932	16
123.22	0	123.22	0	123.22	8	123.22	0	123.22	0	123.22	0	123.22	0	123.22	9	123.22	0	123.22	0	123.22	5	123.22	13	103.501	95	163.712	0	103.501	17	103.501	15	102.938	30	102.938	17	102.938	7	102.938	6
123.227	0	123.227	0	123.227	1	123.227	1	123.227	0	123.227	0	123.227	0	123.227	4	123.227	0	123.227	0	123.227	2	123.227	11	103.508	87	163.72	0	103.508	8	103.508	8	102.945	37	102.945	23	102.945	2	102.945	0
123.234	0	123.234	5	123.234	0	123.234	4	123.234	0	123.234	0	123.234	0	123.234	2	123.234	0	123.234	0	123.234	0	123.234	1	103.514	92	163.728	0	103.514	1	103.514	9	102.951	9	102.951	8	102.951	7	102.951	0
123.241	0	123.241	0	123.241	0	123.241	3	123.241	0	123.241	0	123.241	0	123.241	1	123.241	0	123.241	0	123.241	6	123.241	6	103.521	88	163.736	2	103.521	0	103.521	33	102.958	1	102.958	14	102.958	9	102.958	7
123.248	0	123.248	0	123.248	1	123.248	2	123.248	0	123.248	0	123.248	0	123.248	7	123.248	0	123.248	0	123.248	1	123.248	10	103.528	101	163.745	4	103.528	0	103.528	12	102.964	0	102.964	12	102.964	7	102.964	14
123.255	0	123.255	0	123.255	0	123.255	0	123.255	0	123.255	0	123.255	0	123.255	8	123.255	0	123.255	0	123.255	0	123.255	4	103.534	107	163.753	6	103.534	0	103.534	14	102.971	0	102.971	28	102.971	1	102.971	4
123.263	0	123.263	0	123.263	1	123.263	8	123.263	0	123.263	0	123.263	0	123.263	1	123.263	0	123.263	0	123.263	5	123.263	1	103.541	133	163.761	2	103.541	0	103.541	8	102.977	5	102.977	29	102.977	2	102.977	5
123.27	0	123.27	5	123.27	1	123.27	12	123.27	0	123.27	0	123.27	0	123.27	1	123.27	0	123.27	0	123.27	5	123.27	0	103.547	111	163.769	17	103.547	4	103.547	19	102.984	21	102.984	13	102.984	5	102.984	2
123.277	0	123.277	2	123.277	2	123.277	11	123.277	0	123.277	0	123.277	0	123.277	2	123.277	0	123.277	0	123.277	3	123.277	2	103.554	123	163.777	7	103.554	27	103.554	43	102.99	23	102.99	0	102.99	7	102.99	32
123.284	0	123.284	0	123.284	0	123.284	0	123.284	0	123.284	0	123.284	0	123.284	4	123.284	0	123.284	2	123.284	8	123.284	0	103.56	98	163.786	2	103.56	12	103.56	37	102.997	6	102.997	6	102.997	2	102.997	41
123.291	0	123.291	0	123.291	0	123.291	2	123.291	0	123.291	0	123.291	0	123.291	2	123.291	0	123.291	0	123.291	2	123.291	0	103.567	115	163.794	0	103.567	6	103.567	25	103.003	1	103.003	8	103.003	18	103.003	19
123.298	0	123.298	0	123.298	0	123.298	1	123.298	0	123.298	0	123.298	0	123.298	1	123.298	0	123.298	0	123.298	3	123.298	1	103.573	107	163.802	0	103.573	57	103.573	9	103.01	0	103.01	13	103.01	21	103.01	6
123.305	0	123.305	1	123.305	1	123.305	0	123.305	0	123.305	0	123.305	0	123.305	0	123.305	0	123.305	0	123.305	2	123.305	2	103.58	79	163.81	5	103.58	156	103.58	65	103.016	10	103.016	5	103.016	11	103.016	2
123.313	1	123.313	2	123.313	0	123.313	1	123.313	0	123.313	0	123.313	0	123.313	0	123.313	0	123.313	0	123.313	2	123.313	0	103.587	99	163.818	11	103.587	259	103.587	120	103.023	12	103.023	5	103.023	23	103.023	3
123.32	0	123.32	1	123.32	0	123.32	1	123.32	0	123.32	0	123.32	0	123.32	3	123.32	0	123.32	0	123.32	4	123.32	0	103.593	100	163.827	5	103.593	483	103.593	129	103.029	3	103.029	26	103.029	16	103.029	5
123.327	0	123.327	6	123.327	0	123.327	1	123.327	0	123.327	0	123.327	0	123.327	4	123.327	0	123.327	0	123.327	3	123.327	12	103.6	77	163.835	5	103.6	835	103.6	165	103.036	0	103.036	12	103.036	17	103.036	7
123.334	0	123.334	2	123.334	0	123.334	0	123.334	0	123.334	0	123.334	0	123.334	6	123.334	0	123.334	0	123.334	2	123.334	6	103.606	100	163.843	1	103.606	1505	103.606	236	103.042	0	103.042	7	103.042	9	103.042	21
123.341	0	123.341	0	123.341	0	123.341	0	123.341	0	123.341	0	123.341	0	123.341	1	123.341	0	123.341	0	123.341	0	123.341	3	103.613	107	163.851	0	103.613	2054	103.613	253	103.049	15	103.049	38	103.049	2	103.049	8
123.348	0	123.348	0	123.348	7	123.348	7	123.348	0	123.348	0	123.348	0	123.348	1	123.348	0	123.348	0	123.348	0	123.348	9	103.619	84	163.859	0	103.619	2693	103.619	369	103.055	12	103.055	12	103.055	0	103.055	4
123.355	0	123.355	0	123.355	1	123.355	1	123.355	0	123.355	0	123.355	0	123.355	5	123.355	0	123.355	0	123.355	0	123.355	3	103.626	56	163.868	0	103.626	3421	103.626	394	103.062	5	103.062	5	103.062	0	103.062	3
123.363	1	123.363	4	123.363	0	123.363	0	123.363	0	123.363	0	123.363	0	123.363	3	123.363	0	123.363	0	123.363	1	123.363	1	103.633	48	163.876	0	103.633	4046	103.633	403	103.069	9	103.069	9	103.069	0	103.069	0
123.37	0	123.37	1	123.37	0	123.37	2	123.37	0	123.37	0	123.37	0	123.37	5	123.37	0	123.37	0	123.37	9	123.37	2	103.639	72	163.884	0	103.639	4150	103.639	528	103.075	3	103.075	9	103.075	0	103.075	18
123.377	0	123.377	0	123.377	1	123.377	2	123.377	0	123.377	0	123.377	0	123.377	1	123.377	0	123.377	0	123.377	0	123.377	3	103.646	76	163.892	0	103.646	4213	103.646	752	103.082	18	103.082	16	103.082	3	103.082	6
123.384	0	123.384	0	123.384	0	123.384	4	123.384	0	123.384	0	123.384	0	123.384	3	123.384	0	123.384	0	123.384	0	123.384	7	103.652	110	163.901	0	103.652	4606	103.652	820	103.088	6	103.088	8	103.088	21	103.088	8
123.391	0	123.391	0	123.391	0	123.391	1	123.391	0	123.391	0	123.391	0	123.391	0	123.391	0	123.391	0	123.391	5	123.391	0	103.659	121	163.909	0	103.659	4571	103.659	733	103.095	0	103.095	31	103.095	18	103.095	4
123.398	0	123.398	0	123.398	0	123.398	1	123.398	0	123.398	0	123.398	0	123.398	3	123.398	0	123.398	0	123.398	0	123.398	1	103.665	94	163.917	0	103.665	4268	103.665	657	103.101	3	103.101	26	103.101	8	103.101	19
123.406	0	123.406	0	123.406	0	123.406	0	123.406	0	123.406	0	123.406	0	123.406	13	123.406	0	123.406	0	123.406	4	123.406	5	103.672	84	163.925	0	103.672	4040	103.672	584	103.108	15	103.108	31	103.108	3	103.108	29
123.413	0	123.413	0	123.413	0	123.413	0	123.413	0	123.413	0	123.413	0	123.413	4	123.413	0	123.413	0	123.413	3	123.413	4	103.678	82	163.933	0	103.678	3507	103.678	527	103.114	13	103.114	17	103.114	2	103.114	18
123.42	0	123.42	0	123.42	0	123.42	1	123.42	0	123.42	0	123.42	0	123.42	2	123.42	0	123.42	0	123.42	0	123.42	1	103.685	77	163.942	3	103.685	2600	103.685	417	103.121	16	103.121	9	103.121	1	103.121	22
123.427	0	123.427	0	123.427	0	123.427	3	123.427	0	123.427	0	123.427	0	123.427	1	123.427	0	123.427	0	123.427	1	123.427	1	103.692	87	163.95	1	103.692	1851	103.692	367	103.127	13	103.127	2	103.127	0	103.127	11
123.434	0	123.434	0	123.434	0	123.434	5	123.434	0	123.434	0	123.434	0	123.434	2	123.434	0	123.434	0	123.434	3	123.434	6	103.698	90	163.958	0	103.698	1350	103.698	299	103.134	7	103.134	26	103.134	0	103.134	49
123.441	0	123.441	0	123.441	1	123.441	0	123.441	0	123.441	0	123.441	0	123.441	4	123.441	0	123.441	0	123.441	1	123.441	0	103.705	65	163.966	0	103.705	969	103.705	143	103.14	26	103.14	41	103.14	0	103.14	49
123.448	0	123.448	3	123.448	1	123.448	0	123.448	0	123.448	0	123.448	0	123.448	0	123.448	0	123.448	0	123.448	0	123.448	6	103.711	73	163.974	0	103.711	682	103.711	110	103.147	57	103.147	25	103.147	0	103.147	73
123.456	0	123.456	0	123.456	0	123.456	3	123.456	0	123.456	0	123.456	0	123.456	0	123.456	0	123.456	0	123.456	0	123.456	2	103.718	75	163.983	0	103.718	448	103.718	58	103.153	63	103.153	17	103.153	3	103.153	107
123.463	0	123.463	2	123.463	0	123.463	3	123.463	0	123.463	0	123.463	0	123.463	0	123.463	0	123.463	0	123.463	1	123.463	0	103.724	100	163.991	3	103.724	286	103.724	22	103.16	49	103.16	7	103.16	1	103.16	101
123.47	0	123.47	1	123.47	0	123.47	1	123.47	0	123.47	0	123.47	0	123.47	0	123.47	0	123.47	0	123.47	5	123.47	0	103.731	108	163.999	2	103.731	178	103.731	46	103.166	90	103.166	21	103.166	3	103.166	101
123.477	0	123.477	0	123.477	0	123.477	1	123.477	0	123.477	0	123.477	0	123.477	2	123.477	0	123.477	0	123.477	0	123.477	3	103.738	118	164.007	0	103.738	155	103.738	38	103.173	143	103.173	83	103.173	0	103.173	142
123.484	0	123.484	0	123.484	1	123.484	7	123.484	0	123.484	0	123.484	0	123.484	1	123.484	0	123.484	0	123.484	0	123.484	2	103.744	89	164.016	0	103.744	167	103.744	15	103.179	144	103.179	81	103.179	24	103.179	197
123.491	0	123.491	0	123.491	2	123.491	3	123.491	0	123.491	0	123.491	0	123.491	1	123.491	0	123.491	0	123.491	3	123.491	3	103.751	46	164.024	0	103.751	106	103.751	31	103.186	157	103.186	99	103.186	40	103.186	317
123.498	0	123.498	0	123.498	0	123.498	2	123.498	0	123.498	0	123.498	0	123.498	1	123.498	0	123.498	0	123.498	3	123.498	7	103.757	39	164.032	2	103.757	79	103.757	45	103.192	230	103.192	89	103.192	13	103.192	510
123.506	0	123.506	0	123.506	0	123.506	2	123.506	0	123.506	0	123.506	0	123.506	1	123.506	0	123.506	0	123.506	1	123.506	0	103.764	57	164.04	0	103.764	76	103.764	27	103.199	242	103.199	156	103.199	19	103.199	712
123.513	0	123.513	0	123.513	0	123.513	1	123.513	0	123.513	0	123.513	0	123.513	0	123.513	0	123.513	0	123.513	9	123.513	11	103.77	78	164.048	3	103.77	41	103.77	9	103.205	199	103.205	131	103.205	19	103.205	900
123.52	0	123.52	0	123.52	1	123.52	0	123.52	0	123.52	0	123.52	0	123.52	5	123.52	0	123.52	0	123.52	4	123.52	9	103.777	77	164.057	0	103.777	29	103.777	15	103.212	253	103.212	94	103.212	19	103.212	975
123.527	0	123.527	0	123.527	0	123.527	0	123.527	0	123.527	0	123.527	0	123.527	1	123.527	0	123.527	0	123.527	0	123.527	1	103.784	86	164.065	0	103.784	32	103.784	31	103.218	252	103.218	147	103.218	12	103.218	1058
123.534	0	123.534	0	123.534	1	123.534	0	123.534	0	123.534	0	123.534	0	123.534	6	123.534	0	123.534	0	123.534	1	123.534	3	103.79	116	164.073	0	103.79	42	103.79	13	103.225	227	103.225	152	103.225	5	103.225	982
123.541	0	123.541	0	123.541	3	123.541	0	123.541	0	123.541	0	123.541	0	123.541	0	123.541	0	123.541	0	123.541	17	123.541	5	103.797	108	164.081	0	103.797	103	103.797	4	103.231	185	103.231	132	103.231	0	103.231	773
123.549	0	123.549	0	123.549	4	123.549	0	123.549	0	123.549	0	123.549	0	123.549	3	123.549	0	123.549	0	123.549	4	123.549	4	103.803	63	164.09	0	103.803	82	103.803	13	103.238	182	103.238	123	103.238	24	103.238	743
123.556	0	123.556	0	123.556	1	123.556	2	123.556	0	123.556	0	123.556	0	123.556	2	123.556	0	123.556	0	123.556	0	123.556	2	103.81	51	164.098	0	103.81	37	103.81	22	103.244	172	103.244	89	103.244	14	103.244	775
123.563	0	123.563	0	123.563	2	123.563	0	123.563	0	123.563	0	123.563	0	123.563	8	123.563	0	123.563	0	123.563	3	123.563	1	103.816	56	164.106	0	103.816	38	103.816	18	103.251	149	103.251	76	103.251	3	103.251	786
123.57	0	123.57	0	123.57	3	123.57	5	123.57	0	123.57	0	123.57	0	123.57	2	123.57	0	123.57	0	123.57	2	123.57	0	103.823	47	164.114	0	103.823	30	103.823	37	103.257	180	103.257	39	103.257	1	103.257	693
123.577	0	123.577	0	123.577	1	123.577	2	123.577	0	123.577	0	123.577	0	123.577	12	123.577	0	123.577	0	123.577	0	123.577	0	103.83	35	164.122	0	103.83	30	103.83	30	103.264	108	103.264	33	103.264	13	103.264	685
123.584	0	123.584	0	123.584	3	123.584	3	123.584	0	123.584	0	123.584	0	123.584	9	123.584	0	123.584	0	123.584	7	123.584	0	103.836	48	164.131	1	103.836	52	103.836	16	103.27	93	103.27	32	103.27	10	103.27	504
123.591	0	123.591	0	123.591	1	123.591	3	123.591	0	123.591	0	123.591	0	123.591	2	123.591	0	123.591	0	123.591	6	123.591	3	103.843	73	164.139	1	103.843	38	103.843	19	103.277	63	103.277	33	103.277	22	103.277	448
123.599	0	123.599	5	123.599	3	123.599	0	123.599	0	123.599	0	123.599	0	123.599	3	123.599	0	123.599	0	123.599	1	123.599	0	103.849	103	164.147	25	103.849	37	103.849	14	103.283	64	103.283	16	103.283	21	103.283	412
123.606	0	123.606	6	123.606	0	123.606	0	123.606	0	123.606	0	123.606	0	123.606	1	123.606	0	123.606	0	123.606	0	123.606	3	103.856	99	164.155	32	103.856	43	103.856	44	103.29	52	103.29	11	103.29	9	103.29	314
123.613	2	123.613	0	123.613	5	123.613	0	123.613	0	123.613	0	123.613	0	123.613	0	123.613	0	123.613	0	123.613	0	123.613	0	103.862	61	164.163	17	103.862	50	103.862	106	103.297	14	103.297	14	103.297	13	103.297	292
123.62	0	123.62	0	123.62	4	123.62	3	123.62	0	123.62	0	123.62	0	123.62	0	123.62	0	123.62	0	123.62	5	123.62	0	103.869	53	164.172	47	103.869	56	103.869	57	103.303	39	103.303	23	103.303	9	103.303	233
123.627	0	123.627	2	123.627	0	123.627	0	123.627	0	123.627	0	123.627	0	123.627	3	123.627	0	123.627	0	123.627	16	123.627	1	103.876	68	164.18	69	103.876	57	103.876	39	103.31	69	103.31	31	103.31	28	103.31	180
123.634	0	123.634	3	123.634	0	123.634	0	123.634	0	123.634	0	123.634	0	123.634	3	123.634	0	123.634	0	123.634	8	123.634	6	103.882	51	164.188	35	103.882	73	103.882	46	103.316	34	103.316	67	103.316	41	103.316	130
123.642	0	123.642	0	123.642	4	123.642	2	123.642	0	123.642	0	123.642	0	123.642	6	123.642	0	123.642	0	123.642	1	123.642	8	103.889	58	164.196	18	103.889	86	103.889	39	103.323	9	103.323	69	103.323	18	103.323	135
123.649	0	123.649	0	123.649	1	123.649	8	123.649	0	123.649	0	123.649	0	123.649	0	123.649	0	123.649	0	123.649	1	123.649	13	103.895	63	164.205	66	103.895	91	103.895	22	103.329	5	103.329	48	103.329	17	103.329	109
123.656	0	123.656	0	123.656	0	123.656	5	123.656	0	123.656	0	123.656	0	123.656	2	123.656	0	123.656	0	123.656	9	123.656	5	103.902	95	164.213	89	103.902	77	103.902	39	103.336	15	103.336	33	103.336	27	103.336	80
123.663	0	123.663	0	123.663	0	123.663	0	123.663	0	123.663	0	123.663	0	123.663	2	123.663	0	123.663	0	123.663	22	123.663	1	103.908	61	164.221	20	103.908	71	103.908	24	103.342	14	103.342	28	103.342	13	103.342	85
123.67	0	123.67	0	123.67	0	123.67	0	123.67	0	123.67	0	123.67	0	123.67	1	123.67	0	123.67	0	123.67	9	123.67	1	103.915	93	164.229	13	103.915	33	103.915	6	103.349	2	103.349	29	103.349	6	103.349	65
123.677	0	123.677	0	123.677	0	123.677	4	123.677	0	123.677	0	123.677	0	123.677	0	123.677	0	123.677	0	123.677	0	123.677	2	103.922	84	164.237	26	103.922	18	103.922	17	103.355	2	103.355	25	103.355	4	103.355	81
123.685	0	123.685	0	123.685	0	123.685	7	123.685	0	123.685	0	123.685	0	123.685	3	123.685	0	123.685	0	123.685	2	123.685	0	103.928	94	164.246	22	103.928	17	103.928	9	103.362	1	103.362	42	103.362	4	103.362	72
123.692	0	123.692	0	123.692	0	123.692	1	123.692	0	123.692	0	123.692	0	123.692	0	123.692	0	123.692	0	123.692	1	123.692	0	103.935	67	164.254	15	103.935	7	103.935	14	103.368	0	103.368	32	103.368	1	103.368	75
123.699	0	123.699	1	123.699	0	123.699	14	123.699	0	123.699	0	123.699	0	123.699	0	123.699	0	123.699	0	123.699	0	123.699	1	103.941	67	164.262	0	103.941	9	103.941	18	103.375	0	103.375	22	103.375	6	103.375	84
123.706	0	123.706	0	123.706	0	123.706	10	123.706	0	123.706	0	123.706	0	123.706	11	123.706	0	123.706	0	123.706	3	123.706	0	103.948	92	164.27	0	103.948	12	103.948	11	103.381	0	103.381	25	103.381	17	103.381	106
123.713	0	123.713	0	123.713	0	123.713	1	123.713	0	123.713	0	123.713	0	123.713	14	123.713	0	123.713	0	123.713	0	123.713	0	103.954	54	164.279	0	103.954	13	103.954	5	103.388	28	103.388	10	103.388	9	103.388	150
123.72	0	123.72	0	123.72	3	123.72	0	123.72	0	123.72	0	123.72	0	123.72	2	123.72	0	123.72	0	123.72	0	123.72	1	103.961	47	164.287	10	103.961	28	103.961	9	103.394	23	103.394	16	103.394	9	103.394	84
123.727	0	123.727	0	123.727	4	123.727	4	123.727	0	123.727	0	123.727	0	123.727	0	123.727	0	123.727	0	123.727	0	123.727	1	103.968	67	164.295	7	103.968	33	103.968	16	103.401	9	103.401	6	103.401	16	103.401	61
123.735	0	123.735	0	123.735	7	123.735	2	123.735	0	123.735	0	123.735	0	123.735	4	123.735	0	123.735	0	123.735	2	123.735	0	103.974	53	164.303	36	103.974	18	103.974	12	103.407	1	103.407	18	103.407	24	103.407	57
123.742	0	123.742	0	123.742	0	123.742	0	123.742	0	123.742	0	123.742	0	123.742	0	123.742	0	123.742	0	123.742	1	123.742	1	103.981	70	164.311	32	103.981	10	103.981	14	103.414	10	103.414	18	103.414	33	103.414	66
123.749	0	123.749	0	123.749	0	123.749	0	123.749	0	123.749	0	123.749	0	123.749	1	123.749	0	123.749	0	123.749	15	123.749	0	103.987	94	164.32	18	103.987	5	103.987	21	103.42	13	103.42	25	103.42	28	103.42	38
123.756	0	123.756	0	123.756	0	123.756	1	123.756	0	123.756	0	123.756	0	123.756	2	123.756	0	123.756	0	123.756	3	123.756	3	103.994	68	164.328	2	103.994	3	103.994	15	103.427	4	103.427	30	103.427	13	103.427	46
123.763	0	123.763	0	123.763	11	123.763	0	123.763	0	123.763	0	123.763	0	123.763	0	123.763	0	123.763	0	123.763	5	123.763	3	104.001	43	164.336	16	104.001	11	104.001	36	103.433	11	103.433	23	103.433	13	103.433	39
123.77	0	123.77	0	123.77	12	123.77	0	123.77	0	123.77	0	123.77	0	123.77	0	123.77	0	123.77	0	123.77	0	123.77	1	104.007	52	164.344	14	104.007	27	104.007	30	103.44	16	103.44	15	103.44	20	103.44	23
123.778	0	123.778	1	123.778	5	123.778	0	123.778	0	123.778	0	123.778	0	123.778	0	123.778	0	123.778	0	123.778	8	123.778	8	104.014	66	164.353	22	104.014	17	104.014	12	103.446	6	103.446	7	103.446	9	103.446	17
123.785	0	123.785	3	123.785	0	123.785	0	123.785	0	123.785	0	123.785	0	123.785	6	123.785	0	123.785	0	123.785	14	123.785	5	104.02	115	164.361	30	104.02	13	104.02	15	103.453	0	103.453	3	103.453	15	103.453	14
123.792	0	123.792	0	123.792	0	123.792	0	123.792	0	123.792	0	123.792	0	123.792	1	123.792	0	123.792	0	123.792	3	123.792	3	104.027	144	164.369	18	104.027	22	104.027	2	103.46	0	103.46	2	103.46	17	103.46	15
123.799	0	123.799	0	123.799	1	123.799	0	123.799	0	123.799	0	123.799	0	123.799	0	123.799	0	123.799	0	123.799	1	123.799	2	104.033	125	164.377	14	104.033	4	104.033	6	103.466	0	103.466	6	103.466	11	103.466	15
123.806	0	123.806	9	123.806	1	123.806	0	123.806	0	123.806	0	123.806	0	123.806	1	123.806	0	123.806	0	123.806	4	123.806	0	104.04	137	164.386	18	104.04	1	104.04	19	103.473	0	103.473	9	103.473	8	103.473	17
123.813	0	123.813	3	123.813	2	123.813	0	123.813	0	123.813	0	123.813	0	123.813	0	123.813	0	123.813	0	123.813	2	123.813	0	104.047	104	164.394	18	104.047	0	104.047	7	103.479	0	103.479	8	103.479	18	103.479	18
123.821	0	123.821	1	123.821	1	123.821	3	123.821	0	123.821	0	123.821	0	123.821	2	123.821	0	123.821	0	123.821	2	123.821	9	104.053	80	164.402	2	104.053	7	104.053	19	103.486	0	103.486	6	103.486	38	103.486	22
123.828	0	123.828	1	123.828	0	123.828	3	123.828	0	123.828	0	123.828	0	123.828	3	123.828	0	123.828	0	123.828	3	123.828	6	104.06	84	164.41	0	104.06	9	104.06	26	103.492	0	103.492	11	103.492	53	103.492	29
123.835	0	123.835	3	123.835	4	123.835	1	123.835	0	123.835	0	123.835	0	123.835	3	123.835	0	123.835	0	123.835	0	123.835	4	104.066	53	164.418	4	104.066	2	104.066	33	103.499	0	103.499	23	103.499	40	103.499	21
123.842	0	123.842	3	123.842	1	123.842	3	123.842	0	123.842	0	123.842	0	123.842	10	123.842	0	123.842	0	123.842	1	123.842	9	104.073	46	164.427	17	104.073	38	104.073	38	103.505	5	103.505	32	103.505	25	103.505	21
123.849	0	123.849	0	123.849	7	123.849	0	123.849	0	123.849	0	123.849	0	123.849	1	123.849	0	123.849	0	123.849	2	123.849	3	104.079	69	164.435	18	104.079	26	104.079	32	103.512	7	103.512	55	103.512	30	103.512	11
123.856	1	123.856	0	123.856	8	123.856	3	123.856	0	123.856	0	123.856	0	123.856	9	123.856	0	123.856	0	123.856	9	123.856	1	104.086	117	164.443	13	104.086	7	104.086	19	103.518	2	103.518	24	103.518	19	103.518	4
123.864	0	123.864	3	123.864	4	123.864	6	123.864	0	123.864	0	123.864	0	123.864	3	123.864	0	123.864	0	123.864	8	123.864	5	104.093	120	164.451	1	104.093	3	104.093	12	103.525	11	103.525	23	103.525	9	103.525	11
123.871	0	123.871	0	123.871	4	123.871	3	123.871	0	123.871	0	123.871	0	123.871	4	123.871	0	123.871	0	123.871	3	123.871	17	104.099	94	164.46	0	104.099	16	104.099	20	103.531	5	103.531	52	103.531	5	103.531	6
123.878	0	123.878	0	123.878	4	123.878	4	123.878	0	123.878	0	123.878	0	123.878	6	123.878	0	123.878	0	123.878	9	123.878	2	104.106	33	164.468	0	104.106	78	104.106	26	103.538	0	103.538	27	103.538	4	103.538	22
123.885	0	123.885	0	123.885	11	123.885	3	123.885	0	123.885	0	123.885	0	123.885	4	123.885	0	123.885	0	123.885	10	123.885	8	104.112	36	164.476	4	104.112	66	104.112	19	103.544	0	103.544	12	103.544	3	103.544	19
123.892	0	123.892	0	123.892	9	123.892	12	123.892	0	123.892	0	123.892	0	123.892	2	123.892	0	123.892	0	123.892	7	123.892	10	104.119	30	164.484	2	104.119	28	104.119	35	103.551	0	103.551	26	103.551	3	103.551	9
123.899	0	123.899	0	123.899	4	123.899	5	123.899	0	123.899	0	123.899	0	123.899	5	123.899	0	123.899	0	123.899	2	123.899	10	104.126	58	164.492	0	104.126	15	104.126	33	103.557	0	103.557	31	103.557	7	103.557	23
123.907	1	123.907	0	123.907	1	123.907	7	123.907	0	123.907	0	123.907	0	123.907	12	123.907	0	123.907	0	123.907	1	123.907	2	104.132	52	164.501	0	104.132	3	104.132	27	103.564	5	103.564	21	103.564	21	103.564	16
123.914	0	123.914	4	123.914	2	123.914	5	123.914	0	123.914	0	123.914	0	123.914	11	123.914	0	123.914	0	123.914	0	123.914	1	104.139	50	164.509	0	104.139	17	104.139	13	103.57	30	103.57	5	103.57	14	103.57	21
123.921	5	123.921	1	123.921	9	123.921	10	123.921	0	123.921	0	123.921	0	123.921	6	123.921	0	123.921	0	123.921	0	123.921	1	104.145	71	164.517	1	104.145	31	104.145	23	103.577	11	103.577	19	103.577	12	103.577	11
123.928	5	123.928	0	123.928	11	123.928	26	123.928	0	123.928	0	123.928	0	123.928	5	123.928	0	123.928	0	123.928	0	123.928	5	104.152	107	164.525	29	104.152	14	104.152	6	103.583	3	103.583	21	103.583	21	103.583	3
123.935	6	123.935	1	123.935	7	123.935	12	123.935	0	123.935	0	123.935	0	123.935	4	123.935	0	123.935	0	123.935	4	123.935	3	104.158	111	164.534	15	104.158	5	104.158	24	103.59	0	103.59	6	103.59	10	103.59	0
123.942	6	123.942	0	123.942	4	123.942	11	123.942	0	123.942	0	123.942	0	123.942	10	123.942	0	123.942	0	123.942	10	123.942	4	104.165	79	164.542	5	104.165	6	104.165	27	103.597	0	103.597	7	103.597	19	103.597	3
123.95	4	123.95	0	123.95	7	123.95	6	123.95	0	123.95	0	123.95	0	123.95	4	123.95	0	123.95	0	123.95	5	123.95	1	104.172	73	164.55	2	104.172	1	104.172	9	103.603	0	103.603	9	103.603	32	103.603	4
123.957	4	123.957	5	123.957	3	123.957	9	123.957	0	123.957	0	123.957	0	123.957	8	123.957	0	123.957	0	123.957	12	123.957	0	104.178	141	164.558	0	104.178	7	104.178	7	103.61	0	103.61	0	103.61	24	103.61	0
123.964	5	123.964	3	123.964	4	123.964	11	123.964	0	123.964	0	123.964	0	123.964	0	123.964	0	123.964	0	123.964	11	123.964	2	104.185	105	164.567	0	104.185	20	104.185	13	103.616	0	103.616	3	103.616	22	103.616	10
123.971	2	123.971	10	123.971	12	123.971	1	123.971	0	123.971	0	123.971	0	123.971	9	123.971	0	123.971	0	123.971	3	123.971	12	104.191	72	164.575	0	104.191	14	104.191	19	103.623	0	103.623	9	103.623	11	103.623	7
123.978	0	123.978	0	123.978	3	123.978	0	123.978	0	123.978	0	123.978	0	123.978	2	123.978	0	123.978	0	123.978	4	123.978	7	104.198	52	164.583	0	104.198	11	104.198	6	103.629	0	103.629	11	103.629	7	103.629	0
123.985	1	123.985	0	123.985	0	123.985	0	123.985	0	123.985	0	123.985	0	123.985	1	123.985	0	123.985	0	123.985	8	123.985	3	104.204	66	164.591	0	104.204	24	104.204	18	103.636	17	103.636	3	103.636	10	103.636	0
123.993	1	123.993	0	123.993	0	123.993	6	123.993	0	123.993	0	123.993	0	123.993	4	123.993	0	123.993	0	123.993	9	123.993	8	104.211	24	164.599	0	104.211	12	104.211	33	103.642	19	103.642	22	103.642	4	103.642	0
124	1	124	1	124	3	124	15	124	0	124	0	124	0	124	9	124	0	124	0	124	0	124	3	104.218	25	164.608	0	104.218	2	104.218	28	103.649	21	103.649	39	103.649	9	103.649	9
124.007	4	124.007	0	124.007	9	124.007	4	124.007	0	124.007	0	124.007	0	124.007	6	124.007	0	124.007	0	124.007	0	124.007	2	104.224	32	164.616	0	104.224	2	104.224	29	103.655	5	103.655	36	103.655	6	103.655	2
124.014	0	124.014	0	124.014	5	124.014	4	124.014	0	124.014	0	124.014	0	124.014	0	124.014	0	124.014	1	124.014	1	124.014	2	104.231	42	164.624	0	104.231	0	104.231	13	103.662	0	103.662	7	103.662	1	103.662	5
124.021	0	124.021	0	124.021	8	124.021	2	124.021	0	124.021	0	124.021	0	124.021	8	124.021	0	124.021	0	124.021	6	124.021	1	104.237	63	164.632	0	104.237	2	104.237	13	103.668	0	103.668	1	103.668	0	103.668	2
124.028	0	124.028	1	124.028	11	124.028	5	124.028	0	124.028	0	124.028	0	124.028	3	124.028	0	124.028	0	124.028	0	124.028	5	104.244	74	164.641	6	104.244	28	104.244	18	103.675	0	103.675	0	103.675	5	103.675	8
124.036	0	124.036	1	124.036	15	124.036	7	124.036	0	124.036	0	124.036	0	124.036	0	124.036	0	124.036	0	124.036	0	124.036	1	104.251	70	164.649	0	104.251	46	104.251	12	103.681	0	103.681	11	103.681	9	103.681	7
124.043	0	124.043	2	124.043	2	124.043	9	124.043	0	124.043	0	124.043	0	124.043	0	124.043	0	124.043	0	124.043	2	124.043	5	104.257	64	164.657	0	104.257	16	104.257	8	103.688	0	103.688	16	103.688	3	103.688	14
124.05	0	124.05	4	124.05	6	124.05	7	124.05	0	124.05	0	124.05	0	124.05	5	124.05	0	124.05	3	124.05	0	124.05	0	104.264	93	164.665	0	104.264	7	104.264	7	103.694	5	103.694	2	103.694	2	103.694	23
124.057	0	124.057	0	124.057	0	124.057	0	124.057	0	124.057	0	124.057	0	124.057	1	124.057	0	124.057	0	124.057	2	124.057	0	104.27	90	164.674	0	104.27	18	104.27	9	103.701	36	103.701	13	103.701	9	103.701	22
124.064	0	124.064	4	124.064	1	124.064	0	124.064	0	124.064	0	124.064	0	124.064	0	124.064	0	124.064	0	124.064	2	124.064	1	104.277	82	164.682	5	104.277	17	104.277	30	103.708	17	103.708	12	103.708	4	103.708	5
124.071	0	124.071	5	124.071	3	124.071	0	124.071	0	124.071	0	124.071	0	124.071	0	124.071	0	124.071	0	124.071	0	124.071	0	104.284	80	164.69	1	104.284	27	104.284	60	103.714	11	103.714	45	103.714	6	103.714	3
124.079	0	124.079	3	124.079	9	124.079	6	124.079	0	124.079	0	124.079	0	124.079	2	124.079	0	124.079	0	124.079	1	124.079	0	104.29	93	164.698	0	104.29	29	104.29	27	103.721	2	103.721	26	103.721	3	103.721	3
124.086	2	124.086	1	124.086	2	124.086	5	124.086	0	124.086	0	124.086	0	124.086	1	124.086	0	124.086	0	124.086	3	124.086	1	104.297	94	164.706	0	104.297	10	104.297	9	103.727	0	103.727	7	103.727	15	103.727	0
124.093	4	124.093	2	124.093	1	124.093	0	124.093	0	124.093	0	124.093	0	124.093	4	124.093	0	124.093	0	124.093	1	124.093	1	104.303	131	164.715	0	104.303	8	104.303	5	103.734	0	103.734	4	103.734	21	103.734	11
124.1	2	124.1	1	124.1	3	124.1	0	124.1	0	124.1	0	124.1	0	124.1	2	124.1	0	124.1	0	124.1	0	124.1	7	104.31	159	164.723	5	104.31	5	104.31	5	103.74	0	103.74	0	103.74	26	103.74	7
124.107	0	124.107	0	124.107	1	124.107	1	124.107	0	124.107	0	124.107	0	124.107	10	124.107	0	124.107	0	124.107	1	124.107	2	104.316	123	164.731	19	104.316	0	104.316	15	103.747	3	103.747	25	103.747	21	103.747	0
124.114	0	124.114	0	124.114	1	124.114	0	124.114	0	124.114	0	124.114	0	124.114	1	124.114	0	124.114	0	124.114	1	124.114	0	104.323	84	164.739	5	104.323	5	104.323	42	103.753	4	103.753	10	103.753	18	103.753	8
124.122	0	124.122	1	124.122	0	124.122	0	124.122	0	124.122	0	124.122	0	124.122	0	124.122	0	124.122	0	124.122	1	124.122	2	104.33	72	164.748	1	104.33	0	104.33	21	103.76	3	103.76	10	103.76	17	103.76	3
124.129	0	124.129	1	124.129	5	124.129	0	124.129	0	124.129	0	124.129	0	124.129	9	124.129	0	124.129	0	124.129	4	124.129	2	104.336	96	164.756	0	104.336	1	104.336	7	103.766	10	103.766	39	103.766	16	103.766	0
124.136	0	124.136	0	124.136	2	124.136	0	124.136	0	124.136	0	124.136	0	124.136	0	124.136	0	124.136	0	124.136	0	124.136	3	104.343	47	164.764	11	104.343	18	104.343	6	103.773	14	103.773	19	103.773	44	103.773	0
124.143	0	124.143	0	124.143	0	124.143	6	124.143	0	124.143	0	124.143	0	124.143	0	124.143	0	124.143	0	124.143	0	124.143	0	104.349	47	164.772	18	104.349	21	104.349	18	103.779	3	103.779	36	103.779	33	103.779	0
124.15	0	124.15	0	124.15	13	124.15	2	124.15	0	124.15	0	124.15	0	124.15	5	124.15	0	124.15	0	124.15	0	124.15	0	104.356	115	164.781	26	104.356	12	104.356	29	103.786	6	103.786	57	103.786	26	103.786	0
124.157	0	124.157	0	124.157	10	124.157	2	124.157	0	124.157	0	124.157	0	124.157	0	124.157	0	124.157	0	124.157	11	124.157	0	104.363	184	164.789	16	104.363	16	104.363	27	103.792	11	103.792	48	103.792	17	103.792	1
124.165	0	124.165	0	124.165	2	124.165	1	124.165	0	124.165	0	124.165	0	124.165	0	124.165	0	124.165	0	124.165	13	124.165	0	104.369	176	164.797	8	104.369	11	104.369	18	103.799	3	103.799	56	103.799	7	103.799	0
124.172	0	124.172	4	124.172	1	124.172	8	124.172	0	124.172	0	124.172	0	124.172	0	124.172	0	124.172	0	124.172	3	124.172	0	104.376	142	164.805	0	104.376	20	104.376	34	103.806	0	103.806	24	103.806	6	103.806	2
124.179	0	124.179	0	124.179	0	124.179	0	124.179	0	124.179	0	124.179	0	124.179	0	124.179	0	124.179	0	124.179	1	124.179	6	104.382	140	164.814	0	104.382	13	104.382	26	103.812	5	103.812	21	103.812	21	103.812	8
124.186	0	124.186	0	124.186	0	124.186	0	124.186	0	124.186	0	124.186	0	124.186	0	124.186	0	124.186	0	124.186	2	124.186	4	104.389	118	164.822	0	104.389	3	104.389	13	103.819	0	103.819	38	103.819	27	103.819	5
124.193	0	124.193	2	124.193	5	124.193	0	124.193	0	124.193	0	124.193	0	124.193	0	124.193	0	124.193	0	124.193	2	124.193	5	104.396	67	164.83	0	104.396	6	104.396	5	103.825	0	103.825	31	103.825	31	103.825	2
124.2	0	124.2	2	124.2	2	124.2	5	124.2	0	124.2	0	124.2	0	124.2	11	124.2	0	124.2	0	124.2	2	124.2	2	104.402	81	164.838	0	104.402	24	104.402	0	103.832	5	103.832	53	103.832	22	103.832	11
124.208	0	124.208	3	124.208	1	124.208	3	124.208	0	124.208	0	124.208	0	124.208	3	124.208	0	124.208	0	124.208	9	124.208	2	104.409	114	164.847	0	104.409	14	104.409	5	103.838	17	103.838	26	103.838	10	103.838	19
124.215	0	124.215	0	124.215	2	124.215	3	124.215	0	124.215	0	124.215	0	124.215	0	124.215	0	124.215	0	124.215	3	124.215	3	104.415	116	164.855	0	104.415	16	104.415	8	103.845	1	103.845	11	103.845	7	103.845	9
124.222	0	124.222	0	124.222	0	124.222	1	124.222	0	124.222	0	124.222	0	124.222	0	124.222	0	124.222	0	124.222	1	124.222	4	104.422	105	164.863	0	104.422	9	104.422	9	103.851	8	103.851	6	103.851	5	103.851	4
124.229	0	124.229	0	124.229	0	124.229	5	124.229	0	124.229	0	124.229	0	124.229	1	124.229	0	124.229	0	124.229	1	124.229	1	104.428	85	164.871	0	104.428	10	104.428	1	103.858	0	103.858	14	103.858	4	103.858	0
124.236	0	124.236	2	124.236	1	124.236	3	124.236	0	124.236	0	124.236	0	124.236	1	124.236	1	124.236	0	124.236	1	124.236	8	104.435	64	164.879	0	104.435	16	104.435	4	103.864	0	103.864	4	103.864	1	103.864	0
124.243	0	124.243	1	124.243	1	124.243	8	124.243	0	124.243	0	124.243	0	124.243	7	124.243	2	124.243	0	124.243	3	124.243	3	104.442	73	164.888	0	104.442	9	104.442	0	103.871	0	103.871	14	103.871	11	103.871	0
124.251	0	124.251	1	124.251	0	124.251	3	124.251	0	124.251	0	124.251	0	124.251	3	124.251	0	124.251	0	124.251	0	124.251	2	104.448	96	164.896	0	104.448	1	104.448	7	103.877	0	103.877	9	103.877	13	103.877	0
124.258	0	124.258	2	124.258	0	124.258	1	124.258	0	124.258	0	124.258	0	124.258	1	124.258	0	124.258	0	124.258	1	124.258	4	104.455	69	164.904	0	104.455	0	104.455	4	103.884	0	103.884	0	103.884	11	103.884	15
124.265	0	124.265	6	124.265	2	124.265	0	124.265	0	124.265	0	124.265	0	124.265	0	124.265	0	124.265	0	124.265	3	124.265	0	104.461	67	164.912	17	104.461	0	104.461	23	103.89	0	103.89	15	103.89	8	103.89	24
124.272	0	124.272	3	124.272	1	124.272	2	124.272	0	124.272	0	124.272	0	124.272	1	124.272	0	124.272	0	124.272	8	124.272	0	104.468	123	164.921	15	104.468	7	104.468	26	103.897	0	103.897	25	103.897	4	103.897	5
124.279	0	124.279	0	124.279	2	124.279	1	124.279	0	124.279	0	124.279	0	124.279	0	124.279	0	124.279	0	124.279	0	124.279	0	104.475	126	164.929	3	104.475	2	104.475	43	103.904	0	103.904	15	103.904	2	103.904	1
124.287	0	124.287	0	124.287	0	124.287	0	124.287	0	124.287	0	124.287	0	124.287	0	124.287	0	124.287	0	124.287	4	124.287	1	104.481	102	164.937	8	104.481	3	104.481	32	103.91	0	103.91	6	103.91	13	103.91	5
124.294	0	124.294	0	124.294	8	124.294	7	124.294	0	124.294	0	124.294	0	124.294	0	124.294	0	124.294	0	124.294	6	124.294	0	104.488	91	164.945	2	104.488	3	104.488	9	103.917	0	103.917	4	103.917	21	103.917	1
124.301	0	124.301	0	124.301	0	124.301	4	124.301	0	124.301	0	124.301	0	124.301	0	124.301	0	124.301	0	124.301	7	124.301	0	104.494	72	164.954	1	104.494	7	104.494	9	103.923	0	103.923	13	103.923	9	103.923	19
124.308	0	124.308	1	124.308	0	124.308	2	124.308	0	124.308	0	124.308	0	124.308	0	124.308	0	124.308	0	124.308	4	124.308	2	104.501	78	164.962	0	104.501	21	104.501	19	103.93	0	103.93	18	103.93	4	103.93	15
124.315	0	124.315	0	124.315	0	124.315	0	124.315	0	124.315	0	124.315	0	124.315	3	124.315	0	124.315	0	124.315	0	124.315	0	104.508	76	164.97	0	104.508	9	104.508	6	103.936	5	103.936	15	103.936	5	103.936	21
124.322	0	124.322	0	124.322	0	124.322	2	124.322	0	124.322	0	124.322	0	124.322	1	124.322	0	124.322	0	124.322	1	124.322	0	104.514	46	164.978	0	104.514	17	104.514	0	103.943	7	103.943	13	103.943	11	103.943	9
124.33	0	124.33	2	124.33	1	124.33	0	124.33	0	124.33	0	124.33	0	124.33	0	124.33	0	124.33	0	124.33	4	124.33	0	104.521	58	164.987	0	104.521	9	104.521	2	103.949	4	103.949	23	103.949	5	103.949	10
124.337	0	124.337	0	124.337	2	124.337	0	124.337	0	124.337	0	124.337	0	124.337	0	124.337	0	124.337	0	124.337	1	124.337	4	104.527	88	164.995	0	104.527	12	104.527	40	103.956	8	103.956	31	103.956	9	103.956	7
124.344	0	124.344	1	124.344	0	124.344	2	124.344	0	124.344	0	124.344	0	124.344	4	124.344	0	124.344	0	124.344	5	124.344	0	104.534	114	165.003	0	104.534	11	104.534	23	103.962	2	103.962	9	103.962	7	103.962	3
124.351	0	124.351	0	124.351	0	124.351	1	124.351	0	124.351	0	124.351	0	124.351	10	124.351	0	124.351	0	124.351	1	124.351	0	104.541	126	165.011	0	104.541	7	104.541	15	103.969	19	103.969	21	103.969	12	103.969	9
124.358	0	124.358	2	124.358	0	124.358	0	124.358	0	124.358	0	124.358	0	124.358	2	124.358	0	124.358	0	124.358	2	124.358	0	104.547	96	165.02	0	104.547	10	104.547	33	103.975	19	103.975	18	103.975	16	103.975	11
124.365	0	124.365	0	124.365	0	124.365	3	124.365	0	124.365	0	124.365	0	124.365	5	124.365	0	124.365	0	124.365	1	124.365	0	104.554	69	165.028	0	104.554	3	104.554	42	103.982	5	103.982	11	103.982	12	103.982	31
124.373	0	124.373	2	124.373	3	124.373	3	124.373	0	124.373	0	124.373	0	124.373	3	124.373	0	124.373	0	124.373	9	124.373	0	104.56	47	165.036	2	104.56	1	104.56	18	103.989	0	103.989	3	103.989	5	103.989	15
124.38	0	124.38	0	124.38	0	124.38	1	124.38	0	124.38	0	124.38	0	124.38	0	124.38	0	124.38	0	124.38	2	124.38	4	104.567	67	165.044	2	104.567	0	104.567	6	103.995	1	103.995	7	103.995	3	103.995	12
124.387	0	124.387	0	124.387	0	124.387	0	124.387	0	124.387	0	124.387	0	124.387	6	124.387	0	124.387	0	124.387	0	124.387	3	104.573	84	165.053	0	104.573	7	104.573	45	104.002	8	104.002	22	104.002	19	104.002	5
124.394	0	124.394	0	124.394	0	124.394	15	124.394	0	124.394	0	124.394	0	124.394	3	124.394	0	124.394	0	124.394	1	124.394	7	104.58	65	165.061	8	104.58	20	104.58	82	104.008	4	104.008	14	104.008	16	104.008	0
124.401	0	124.401	0	124.401	1	124.401	7	124.401	0	124.401	0	124.401	0	124.401	2	124.401	0	124.401	0	124.401	7	124.401	15	104.587	71	165.069	5	104.587	14	104.587	68	104.015	0	104.015	11	104.015	6	104.015	3
124.409	1	124.409	0	124.409	0	124.409	1	124.409	0	124.409	0	124.409	0	124.409	5	124.409	0	124.409	0	124.409	2	124.409	7	104.593	52	165.077	31	104.593	17	104.593	114	104.021	0	104.021	22	104.021	1	104.021	6
124.416	0	124.416	2	124.416	0	124.416	0	124.416	0	124.416	0	124.416	0	124.416	3	124.416	0	124.416	0	124.416	0	124.416	1	104.6	84	165.085	14	104.6	62	104.6	120	104.028	6	104.028	30	104.028	3	104.028	0
124.423	0	124.423	1	124.423	0	124.423	0	124.423	0	124.423	0	124.423	0	124.423	3	124.423	0	124.423	0	124.423	0	124.423	7	104.606	65	165.094	4	104.606	95	104.606	129	104.034	1	104.034	54	104.034	10	104.034	0
124.43	0	124.43	2	124.43	0	124.43	4	124.43	0	124.43	0	124.43	0	124.43	3	124.43	0	124.43	0	124.43	7	124.43	5	104.613	46	165.102	1	104.613	124	104.613	149	104.041	3	104.041	36	104.041	10	104.041	0
124.437	0	124.437	0	124.437	0	124.437	0	124.437	0	124.437	0	124.437	0	124.437	2	124.437	0	124.437	0	124.437	0	124.437	0	104.62	48	165.11	3	104.62	158	104.62	241	104.047	1	104.047	7	104.047	24	104.047	1
124.444	0	124.444	0	124.444	0	124.444	1	124.444	0	124.444	0	124.444	0	124.444	0	124.444	0	124.444	0	124.444	3	124.444	5	104.626	57	165.118	28	104.626	234	104.626	480	104.054	1	104.054	7	104.054	46	104.054	0
124.452	0	124.452	0	124.452	0	124.452	1	124.452	0	124.452	0	124.452	0	124.452	1	124.452	0	124.452	0	124.452	0	124.452	2	104.633	80	165.127	240	104.633	302	104.633	690	104.061	2	104.061	5	104.061	35	104.061	0
124.459	0	124.459	0	124.459	2	124.459	1	124.459	0	124.459	0	124.459	0	124.459	2	124.459	0	124.459	0	124.459	3	124.459	2	104.639	75	165.135	383	104.639	443	104.639	880	104.067	0	104.067	14	104.067	16	104.067	0
124.466	0	124.466	1	124.466	0	124.466	3	124.466	0	124.466	0	124.466	0	124.466	0	124.466	0	124.466	0	124.466	5	124.466	0	104.646	120	165.143	475	104.646	590	104.646	1280	104.074	0	104.074	32	104.074	11	104.074	1
124.473	2	124.473	0	124.473	1	124.473	2	124.473	0	124.473	0	124.473	0	124.473	1	124.473	0	124.473	0	124.473	4	124.473	0	104.653	113	165.151	512	104.653	622	104.653	2093	104.08	0	104.08	19	104.08	24	104.08	31
124.48	0	124.48	0	124.48	1	124.48	0	124.48	0	124.48	0	124.48	0	124.48	3	124.48	0	124.48	0	124.48	0	124.48	1	104.659	112	165.16	573	104.659	710	104.659	2598	104.087	0	104.087	8	104.087	23	104.087	13
124.488	0	124.488	1	124.488	0	124.488	1	124.488	0	124.488	0	124.488	0	124.488	1	124.488	0	124.488	0	124.488	1	124.488	0	104.666	115	165.168	723	104.666	1035	104.666	2806	104.093	5	104.093	12	104.093	15	104.093	30
124.495	0	124.495	0	124.495	1	124.495	0	124.495	0	124.495	0	124.495	0	124.495	1	124.495	0	124.495	0	124.495	0	124.495	0	104.672	141	165.176	957	104.672	857	104.672	2929	104.1	4	104.1	9	104.1	23	104.1	16
124.502	0	124.502	0	124.502	5	124.502	3	124.502	0	124.502	0	124.502	0	124.502	3	124.502	0	124.502	0	124.502	0	124.502	1	104.679	100	165.184	1180	104.679	730	104.679	2857	104.106	7	104.106	24	104.106	22	104.106	3
124.509	0	124.509	0	124.509	0	124.509	0	124.509	0	124.509	0	124.509	0	124.509	2	124.509	0	124.509	0	124.509	0	124.509	0	104.686	107	165.193	1515	104.686	671	104.686	2368	104.113	1	104.113	45	104.113	23	104.113	1
124.516	0	124.516	0	124.516	0	124.516	1	124.516	0	124.516	0	124.516	0	124.516	0	124.516	0	124.516	0	124.516	0	124.516	2	104.692	105	165.201	1697	104.692	696	104.692	1862	104.119	0	104.119	33	104.119	43	104.119	43
124.523	0	124.523	0	124.523	0	124.523	0	124.523	0	124.523	0	124.523	0	124.523	1	124.523	0	124.523	0	124.523	3	124.523	2	104.699	129	165.209	1801	104.699	600	104.699	1405	104.126	6	104.126	34	104.126	22	104.126	78
124.531	0	124.531	0	124.531	0	124.531	0	124.531	0	124.531	0	124.531	0	124.531	0	124.531	0	124.531	0	124.531	1	124.531	3	104.705	87	165.217	1884	104.705	569	104.705	1153	104.132	58	104.132	8	104.132	13	104.132	72
124.538	0	124.538	0	124.538	3	124.538	0	124.538	0	124.538	0	124.538	0	124.538	0	124.538	0	124.538	0	124.538	3	124.538	8	104.712	51	165.226	1916	104.712	497	104.712	759	104.139	50	104.139	11	104.139	14	104.139	62
124.545	0	124.545	0	124.545	0	124.545	2	124.545	0	124.545	0	124.545	0	124.545	5	124.545	0	124.545	0	124.545	6	124.545	19	104.719	64	165.234	1181	104.719	513	104.719	379	104.146	47	104.146	6	104.146	16	104.146	103
124.552	0	124.552	0	124.552	0	124.552	1	124.552	0	124.552	0	124.552	0	124.552	8	124.552	0	124.552	0	124.552	4	124.552	7	104.725	65	165.242	502	104.725	495	104.725	245	104.152	112	104.152	23	104.152	13	104.152	232
124.559	0	124.559	0	124.559	5	124.559	0	124.559	0	124.559	0	124.559	0	124.559	3	124.559	0	124.559	0	124.559	3	124.559	0	104.732	57	165.25	159	104.732	634	104.732	168	104.159	187	104.159	20	104.159	14	104.159	436
124.567	0	124.567	0	124.567	6	124.567	0	124.567	0	124.567	0	124.567	0	124.567	0	124.567	0	124.567	0	124.567	11	124.567	0	104.738	44	165.259	47	104.738	597	104.738	109	104.165	188	104.165	56	104.165	29	104.165	889
124.574	2	124.574	2	124.574	0	124.574	2	124.574	0	124.574	0	124.574	0	124.574	2	124.574	0	124.574	0	124.574	6	124.574	0	104.745	37	165.267	85	104.745	634	104.745	57	104.172	215	104.172	117	104.172	39	104.172	1267
124.581	0	124.581	6	124.581	0	124.581	0	124.581	0	124.581	0	124.581	0	124.581	0	124.581	0	124.581	0	124.581	1	124.581	1	104.752	116	165.275	55	104.752	510	104.752	37	104.178	248	104.178	118	104.178	64	104.178	1628
124.588	0	124.588	5	124.588	1	124.588	1	124.588	0	124.588	0	124.588	0	124.588	4	124.588	0	124.588	0	124.588	0	124.588	2	104.758	99	165.283	62	104.758	421	104.758	60	104.185	200	104.185	179	104.185	25	104.185	1931
124.595	0	124.595	0	124.595	3	124.595	0	124.595	0	124.595	0	124.595	0	124.595	4	124.595	0	124.595	0	124.595	5	124.595	3	104.765	95	165.292	40	104.765	417	104.765	92	104.191	236	104.191	142	104.191	27	104.191	1831
124.602	0	124.602	0	124.602	0	124.602	0	124.602	0	124.602	0	124.602	0	124.602	3	124.602	0	124.602	0	124.602	0	124.602	4	104.771	99	165.3	21	104.771	411	104.771	44	104.198	282	104.198	105	104.198	57	104.198	2072
124.61	0	124.61	4	124.61	4	124.61	0	124.61	0	124.61	0	124.61	0	124.61	0	124.61	0	124.61	0	124.61	1	124.61	1	104.778	126	165.308	54	104.778	347	104.778	18	104.204	381	104.204	103	104.204	52	104.204	2344
124.617	0	124.617	6	124.617	14	124.617	0	124.617	0	124.617	0	124.617	0	124.617	0	124.617	0	124.617	0	124.617	0	124.617	1	104.785	92	165.316	26	104.785	257	104.785	16	104.211	463	104.211	114	104.211	48	104.211	2289
124.624	0	124.624	5	124.624	4	124.624	0	124.624	0	124.624	0	124.624	0	124.624	3	124.624	0	124.624	0	124.624	0	124.624	0	104.791	53	165.325	21	104.791	296	104.791	42	104.218	359	104.218	171	104.218	60	104.218	2293
124.631	1	124.631	2	124.631	3	124.631	1	124.631	0	124.631	0	124.631	0	124.631	5	124.631	0	124.631	0	124.631	0	124.631	0	104.798	29	165.333	29	104.798	184	104.798	62	104.224	297	104.224	162	104.224	146	104.224	2209
124.638	0	124.638	1	124.638	0	124.638	0	124.638	0	124.638	0	124.638	0	124.638	2	124.638	0	124.638	0	124.638	2	124.638	0	104.804	32	165.341	49	104.804	112	104.804	37	104.231	255	104.231	126	104.231	146	104.231	2041
124.646	0	124.646	0	124.646	0	124.646	0	124.646	0	124.646	0	124.646	0	124.646	8	124.646	0	124.646	0	124.646	1	124.646	2	104.811	53	165.349	34	104.811	89	104.811	16	104.237	310	104.237	97	104.237	92	104.237	1973
124.653	0	124.653	0	124.653	0	124.653	0	124.653	0	124.653	0	124.653	0	124.653	11	124.653	0	124.653	0	124.653	0	124.653	8	104.818	51	165.358	33	104.818	63	104.818	21	104.244	179	104.244	111	104.244	99	104.244	1764
124.66	0	124.66	0	124.66	1	124.66	0	124.66	0	124.66	0	124.66	0	124.66	3	124.66	0	124.66	0	124.66	2	124.66	1	104.824	50	165.366	30	104.824	50	104.824	55	104.25	116	104.25	48	104.25	129	104.25	1405
124.667	0	124.667	0	124.667	0	124.667	5	124.667	0	124.667	0	124.667	0	124.667	7	124.667	0	124.667	0	124.667	1	124.667	0	104.831	40	165.374	21	104.831	41	104.831	48	104.257	60	104.257	45	104.257	99	104.257	1315
124.674	0	124.674	0	124.674	0	124.674	3	124.674	0	124.674	0	124.674	0	124.674	0	124.674	0	124.674	0	124.674	1	124.674	1	104.837	55	165.382	10	104.837	16	104.837	54	104.263	17	104.263	19	104.263	70	104.263	1004
124.681	0	124.681	3	124.681	7	124.681	1	124.681	0	124.681	0	124.681	0	124.681	1	124.681	0	124.681	0	124.681	0	124.681	4	104.844	52	165.391	3	104.844	4	104.844	47	104.27	39	104.27	16	104.27	74	104.27	805
124.689	0	124.689	0	124.689	1	124.689	0	124.689	0	124.689	0	124.689	0	124.689	0	124.689	0	124.689	0	124.689	2	124.689	0	104.851	65	165.399	3	104.851	2	104.851	39	104.277	23	104.277	17	104.277	54	104.277	694
124.696	0	124.696	0	124.696	0	124.696	0	124.696	0	124.696	0	124.696	0	124.696	3	124.696	0	124.696	0	124.696	2	124.696	0	104.857	79	165.407	4	104.857	8	104.857	48	104.283	2	104.283	35	104.283	29	104.283	565
124.703	0	124.703	0	124.703	2	124.703	0	124.703	0	124.703	0	124.703	0	124.703	0	124.703	0	124.703	0	124.703	5	124.703	3	104.864	68	165.415	6	104.864	7	104.864	40	104.29	20	104.29	26	104.29	22	104.29	471
124.71	0	124.71	5	124.71	2	124.71	0	124.71	0	124.71	0	124.71	0	124.71	1	124.71	0	124.71	0	124.71	10	124.71	0	104.87	102	165.424	5	104.87	17	104.87	22	104.296	21	104.296	33	104.296	23	104.296	455
124.717	0	124.717	2	124.717	0	124.717	0	124.717	0	124.717	0	124.717	0	124.717	1	124.717	0	124.717	0	124.717	5	124.717	3	104.877	109	165.432	1	104.877	34	104.877	68	104.303	4	104.303	89	104.303	40	104.303	368
124.725	0	124.725	0	124.725	0	124.725	0	124.725	0	124.725	0	124.725	0	124.725	9	124.725	0	124.725	0	124.725	3	124.725	10	104.884	70	165.44	0	104.884	18	104.884	44	104.309	0	104.309	55	104.309	43	104.309	360
124.732	0	124.732	0	124.732	2	124.732	0	124.732	0	124.732	0	124.732	0	124.732	2	124.732	0	124.732	0	124.732	4	124.732	4	104.89	101	165.448	0	104.89	4	104.89	41	104.316	0	104.316	37	104.316	29	104.316	294
124.739	0	124.739	1	124.739	3	124.739	0	124.739	0	124.739	0	124.739	0	124.739	1	124.739	0	124.739	0	124.739	5	124.739	0	104.897	103	165.457	6	104.897	22	104.897	48	104.322	5	104.322	21	104.322	48	104.322	218
124.746	0	124.746	0	124.746	11	124.746	0	124.746	0	124.746	0	124.746	0	124.746	0	124.746	0	124.746	0	124.746	4	124.746	0	104.904	85	165.465	20	104.904	16	104.904	31	104.329	5	104.329	17	104.329	44	104.329	183
124.753	0	124.753	1	124.753	15	124.753	0	124.753	0	124.753	0	124.753	0	124.753	2	124.753	0	124.753	0	124.753	2	124.753	0	104.91	48	165.473	9	104.91	17	104.91	40	104.335	0	104.335	11	104.335	35	104.335	188
124.761	0	124.761	1	124.761	13	124.761	8	124.761	0	124.761	0	124.761	0	124.761	9	124.761	0	124.761	0	124.761	3	124.761	6	104.917	56	165.481	3	104.917	41	104.917	60	104.342	1	104.342	8	104.342	25	104.342	221
124.768	0	124.768	2	124.768	32	124.768	7	124.768	0	124.768	0	124.768	0	124.768	8	124.768	0	124.768	0	124.768	3	124.768	2	104.923	72	165.49	1	104.923	39	104.923	55	104.349	0	104.349	0	104.349	16	104.349	237
124.775	0	124.775	3	124.775	45	124.775	8	124.775	0	124.775	0	124.775	0	124.775	46	124.775	0	124.775	0	124.775	22	124.775	6	104.93	93	165.498	0	104.93	36	104.93	59	104.355	0	104.355	20	104.355	22	104.355	206
124.782	0	124.782	3	124.782	76	124.782	6	124.782	0	124.782	0	124.782	0	124.782	104	124.782	0	124.782	0	124.782	76	124.782	4	104.937	131	165.506	0	104.937	13	104.937	56	104.362	3	104.362	16	104.362	18	104.362	170
124.789	0	124.789	1	124.789	126	124.789	4	124.789	0	124.789	0	124.789	0	124.789	148	124.789	0	124.789	0	124.789	90	124.789	12	104.943	88	165.514	0	104.943	14	104.943	25	104.368	13	104.368	5	104.368	14	104.368	137
124.797	0	124.797	8	124.797	178	124.797	15	124.797	0	124.797	0	124.797	0	124.797	281	124.797	0	124.797	0	124.797	125	124.797	66	104.95	106	165.523	0	104.95	9	104.95	25	104.375	5	104.375	39	104.375	24	104.375	129
124.804	0	124.804	32	124.804	227	124.804	26	124.804	0	124.804	0	124.804	0	124.804	389	124.804	0	124.804	0	124.804	185	124.804	83	104.956	106	165.531	0	104.956	10	104.956	30	104.381	11	104.381	22	104.381	31	104.381	102
124.811	0	124.811	72	124.811	373	124.811	56	124.811	0	124.811	0	124.811	0	124.811	592	124.811	0	124.811	0	124.811	309	124.811	155	104.963	95	165.539	0	104.963	7	104.963	56	104.388	6	104.388	6	104.388	18	104.388	104
124.818	0	124.818	114	124.818	521	124.818	103	124.818	0	124.818	0	124.818	0	124.818	748	124.818	0	124.818	0	124.818	487	124.818	280	104.97	80	165.547	4	104.97	9	104.97	52	104.394	5	104.394	11	104.394	11	104.394	72
124.825	0	124.825	175	124.825	815	124.825	190	124.825	0	124.825	0	124.825	0	124.825	959	124.825	0	124.825	3	124.825	673	124.825	427	104.976	58	165.556	18	104.976	8	104.976	30	104.401	1	104.401	52	104.401	14	104.401	65
124.832	0	124.832	204	124.832	1052	124.832	316	124.832	0	124.832	0	124.832	2	124.832	1288	124.832	0	124.832	9	124.832	803	124.832	552	104.983	50	165.564	12	104.983	10	104.983	17	104.408	0	104.408	48	104.408	9	104.408	50
124.84	0	124.84	187	124.84	1449	124.84	424	124.84	0	124.84	0	124.84	0	124.84	1495	124.84	0	124.84	3	124.84	1102	124.84	714	104.989	111	165.572	6	104.989	24	104.989	3	104.414	0	104.414	12	104.414	33	104.414	60
124.847	0	124.847	207	124.847	1948	124.847	641	124.847	0	124.847	0	124.847	0	124.847	1682	124.847	0	124.847	0	124.847	1423	124.847	915	104.996	83	165.581	0	104.996	14	104.996	3	104.421	6	104.421	8	104.421	53	104.421	98
124.854	0	124.854	271	124.854	2400	124.854	1008	124.854	0	124.854	0	124.854	0	124.854	1812	124.854	0	124.854	0	124.854	1637	124.854	1193	105.003	88	165.589	0	105.003	21	105.003	44	104.427	1	104.427	8	104.427	43	104.427	89
124.861	12	124.861	246	124.861	3004	124.861	1402	124.861	0	124.861	0	124.861	2	124.861	2043	124.861	0	124.861	2	124.861	1746	124.861	1350	105.009	125	165.597	0	105.009	22	105.009	51	104.434	0	104.434	39	104.434	56	104.434	34
124.868	3	124.868	259	124.868	3592	124.868	1782	124.868	0	124.868	0	124.868	0	124.868	2243	124.868	0	124.868	10	124.868	1745	124.868	1325	105.016	129	165.605	2	105.016	23	105.016	28	104.44	0	104.44	19	104.44	56	104.44	15
124.876	10	124.876	280	124.876	3862	124.876	2165	124.876	0	124.876	0	124.876	0	124.876	2223	124.876	0	124.876	2	124.876	1637	124.876	1295	105.022	118	165.614	11	105.022	8	105.022	6	104.447	2	104.447	9	104.447	78	104.447	16
124.883	10	124.883	319	124.883	3877	124.883	2382	124.883	0	124.883	0	124.883	0	124.883	2123	124.883	1	124.883	8	124.883	1414	124.883	1153	105.029	97	165.622	3	105.029	6	105.029	35	104.453	13	104.453	3	104.453	93	104.453	19
124.89	18	124.89	349	124.89	3702	124.89	2470	124.89	5	124.89	0	124.89	0	124.89	1682	124.89	6	124.89	11	124.89	1133	124.89	889	105.036	98	165.63	0	105.036	31	105.036	50	104.46	6	104.46	31	104.46	73	104.46	12
124.897	11	124.897	370	124.897	3238	124.897	2416	124.897	2	124.897	0	124.897	3	124.897	1286	124.897	6	124.897	13	124.897	998	124.897	626	105.042	92	165.638	7	105.042	45	105.042	34	104.467	3	104.467	34	104.467	59	104.467	9
124.904	14	124.904	366	124.904	2740	124.904	1944	124.904	1	124.904	0	124.904	0	124.904	886	124.904	13	124.904	5	124.904	725	124.904	399	105.049	91	165.647	5	105.049	16	105.049	15	104.473	0	104.473	32	104.473	45	104.473	5
124.912	11	124.912	314	124.912	2213	124.912	1502	124.912	1	124.912	0	124.912	8	124.912	646	124.912	11	124.912	0	124.912	431	124.912	239	105.055	48	165.655	1	105.055	6	105.055	12	104.48	0	104.48	20	104.48	34	104.48	7
124.919	27	124.919	308	124.919	1756	124.919	1185	124.919	5	124.919	0	124.919	12	124.919	465	124.919	6	124.919	5	124.919	231	124.919	140	105.062	66	165.663	0	105.062	22	105.062	19	104.486	0	104.486	7	104.486	45	104.486	34
124.926	23	124.926	251	124.926	1430	124.926	824	124.926	1	124.926	1	124.926	12	124.926	345	124.926	4	124.926	4	124.926	133	124.926	86	105.069	114	165.671	0	105.069	8	105.069	7	104.493	3	104.493	12	104.493	55	104.493	21
124.933	28	124.933	179	124.933	1124	124.933	668	124.933	1	124.933	6	124.933	8	124.933	269	124.933	2	124.933	1	124.933	84	124.933	57	105.075	91	165.68	0	105.075	0	105.075	3	104.499	4	104.499	15	104.499	38	104.499	9
124.94	33	124.94	155	124.94	819	124.94	586	124.94	5	124.94	0	124.94	7	124.94	156	124.94	2	124.94	0	124.94	72	124.94	34	105.082	71	165.688	1	105.082	5	105.082	13	104.506	0	104.506	12	104.506	25	104.506	18
124.948	26	124.948	62	124.948	600	124.948	488	124.948	11	124.948	1	124.948	9	124.948	100	124.948	0	124.948	0	124.948	72	124.948	22	105.089	51	165.696	11	105.089	13	105.089	5	104.512	0	104.512	6	104.512	26	104.512	6
124.955	13	124.955	24	124.955	339	124.955	386	124.955	5	124.955	0	124.955	3	124.955	55	124.955	0	124.955	1	124.955	56	124.955	13	105.095	67	165.704	14	105.095	21	105.095	10	104.519	4	104.519	8	104.519	33	104.519	13
124.962	12	124.962	6	124.962	224	124.962	315	124.962	6	124.962	0	124.962	9	124.962	35	124.962	0	124.962	1	124.962	29	124.962	12	105.102	67	165.713	20	105.102	12	105.102	41	104.526	12	104.526	14	104.526	49	104.526	36
124.969	13	124.969	2	124.969	137	124.969	257	124.969	5	124.969	0	124.969	7	124.969	34	124.969	0	124.969	1	124.969	19	124.969	9	105.108	67	165.721	7	105.108	1	105.108	25	104.532	20	104.532	2	104.532	28	104.532	20
124.976	15	124.976	3	124.976	80	124.976	266	124.976	0	124.976	0	124.976	0	124.976	36	124.976	0	124.976	0	124.976	8	124.976	10	105.115	80	165.729	1	105.115	21	105.115	23	104.539	7	104.539	5	104.539	15	104.539	7
124.984	16	124.984	2	124.984	60	124.984	227	124.984	0	124.984	0	124.984	0	124.984	27	124.984	0	124.984	0	124.984	11	124.984	6	105.122	56	165.737	0	105.122	22	105.122	5	104.545	3	104.545	0	104.545	13	104.545	1
124.991	8	124.991	0	124.991	40	124.991	167	124.991	0	124.991	0	124.991	0	124.991	18	124.991	0	124.991	0	124.991	6	124.991	8	105.128	37	165.746	0	105.128	18	105.128	11	104.552	2	104.552	0	104.552	32	104.552	4
124.998	3	124.998	0	124.998	34	124.998	125	124.998	0	124.998	0	124.998	11	124.998	17	124.998	0	124.998	0	124.998	3	124.998	7	105.135	32	165.754	0	105.135	8	105.135	10	104.558	0	104.558	0	104.558	34	104.558	6
125.005	3	125.005	3	125.005	20	125.005	72	125.005	0	125.005	0	125.005	16	125.005	14	125.005	0	125.005	0	125.005	6	125.005	2	105.141	39	165.762	8	105.141	1	105.141	8	104.565	0	104.565	3	104.565	35	104.565	4
125.012	2	125.012	8	125.012	17	125.012	52	125.012	0	125.012	0	125.012	3	125.012	14	125.012	0	125.012	1	125.012	1	125.012	4	105.148	49	165.77	1	105.148	4	105.148	38	104.571	0	104.571	14	104.571	22	104.571	0
125.02	1	125.02	12	125.02	11	125.02	35	125.02	0	125.02	0	125.02	0	125.02	11	125.02	0	125.02	0	125.02	6	125.02	6	105.155	53	165.779	0	105.155	2	105.155	40	104.578	12	104.578	19	104.578	23	104.578	0
125.027	0	125.027	5	125.027	12	125.027	35	125.027	0	125.027	0	125.027	1	125.027	0	125.027	0	125.027	0	125.027	9	125.027	10	105.161	49	165.787	7	105.161	13	105.161	29	104.585	21	104.585	15	104.585	19	104.585	0
125.034	3	125.034	7	125.034	24	125.034	27	125.034	0	125.034	0	125.034	0	125.034	1	125.034	0	125.034	0	125.034	4	125.034	7	105.168	98	165.795	12	105.168	9	105.168	27	104.591	12	104.591	16	104.591	9	104.591	8
125.041	0	125.041	1	125.041	16	125.041	18	125.041	0	125.041	0	125.041	0	125.041	2	125.041	0	125.041	0	125.041	5	125.041	1	105.174	108	165.803	19	105.174	17	105.174	32	104.598	12	104.598	8	104.598	8	104.598	13
125.048	4	125.048	1	125.048	8	125.048	17	125.048	0	125.048	0	125.048	0	125.048	0	125.048	0	125.048	0	125.048	0	125.048	2	105.181	144	165.812	7	105.181	12	105.181	32	104.604	7	104.604	26	104.604	20	104.604	26
125.055	1	125.055	3	125.055	8	125.055	13	125.055	0	125.055	0	125.055	0	125.055	0	125.055	0	125.055	0	125.055	1	125.055	1	105.188	126	165.82	10	105.188	44	105.188	47	104.611	1	104.611	33	104.611	52	104.611	22
125.063	0	125.063	1	125.063	6	125.063	8	125.063	0	125.063	0	125.063	0	125.063	0	125.063	0	125.063	0	125.063	4	125.063	4	105.194	86	165.828	13	105.194	24	105.194	30	104.617	0	104.617	14	104.617	53	104.617	15
125.07	1	125.07	2	125.07	7	125.07	4	125.07	0	125.07	0	125.07	3	125.07	2	125.07	0	125.07	0	125.07	4	125.07	3	105.201	103	165.837	1	105.201	19	105.201	56	104.624	3	104.624	25	104.624	39	104.624	17
125.077	0	125.077	1	125.077	5	125.077	11	125.077	0	125.077	0	125.077	0	125.077	1	125.077	0	125.077	5	125.077	4	125.077	7	105.208	73	165.845	0	105.208	19	105.208	58	104.63	0	104.63	6	104.63	31	104.63	23
125.084	0	125.084	0	125.084	3	125.084	7	125.084	0	125.084	0	125.084	0	125.084	0	125.084	0	125.084	1	125.084	2	125.084	7	105.214	61	165.853	0	105.214	4	105.214	77	104.637	0	104.637	10	104.637	19	104.637	16
125.091	0	125.091	0	125.091	7	125.091	5	125.091	0	125.091	0	125.091	0	125.091	2	125.091	0	125.091	0	125.091	2	125.091	0	105.221	52	165.861	44	105.221	1	105.221	65	104.644	0	104.644	25	104.644	13	104.644	2
125.099	0	125.099	5	125.099	5	125.099	12	125.099	0	125.099	0	125.099	0	125.099	1	125.099	0	125.099	0	125.099	10	125.099	1	105.227	51	165.87	41	105.227	5	105.227	43	104.65	0	104.65	4	104.65	26	104.65	1
125.106	0	125.106	5	125.106	0	125.106	5	125.106	0	125.106	0	125.106	0	125.106	0	125.106	0	125.106	0	125.106	5	125.106	5	105.234	68	165.878	11	105.234	30	105.234	38	104.657	0	104.657	5	104.657	79	104.657	8
125.113	0	125.113	3	125.113	4	125.113	4	125.113	0	125.113	0	125.113	0	125.113	0	125.113	0	125.113	0	125.113	0	125.113	3	105.241	89	165.886	25	105.241	47	105.241	21	104.663	0	104.663	9	104.663	61	104.663	0
125.12	0	125.12	0	125.12	5	125.12	3	125.12	0	125.12	0	125.12	0	125.12	1	125.12	0	125.12	0	125.12	5	125.12	2	105.247	117	165.894	6	105.247	42	105.247	17	104.67	0	104.67	6	104.67	57	104.67	11
125.127	0	125.127	0	125.127	1	125.127	4	125.127	0	125.127	0	125.127	0	125.127	1	125.127	0	125.127	0	125.127	4	125.127	2	105.254	98	165.903	0	105.254	28	105.254	20	104.676	0	104.676	30	104.676	43	104.676	8
125.135	0	125.135	7	125.135	1	125.135	1	125.135	2	125.135	0	125.135	0	125.135	7	125.135	0	125.135	0	125.135	5	125.135	10	105.26	96	165.911	3	105.26	41	105.26	14	104.683	0	104.683	40	104.683	24	104.683	0
125.142	8	125.142	0	125.142	2	125.142	3	125.142	2	125.142	0	125.142	0	125.142	4	125.142	0	125.142	0	125.142	2	125.142	8	105.267	82	165.919	10	105.267	23	105.267	44	104.69	1	104.69	10	104.69	22	104.69	0
125.149	3	125.149	0	125.149	2	125.149	0	125.149	0	125.149	0	125.149	0	125.149	3	125.149	0	125.149	0	125.149	2	125.149	9	105.274	61	165.927	2	105.274	30	105.274	82	104.696	0	104.696	5	104.696	21	104.696	4
125.156	0	125.156	0	125.156	2	125.156	8	125.156	0	125.156	0	125.156	0	125.156	4	125.156	0	125.156	0	125.156	4	125.156	1	105.28	53	165.936	5	105.28	9	105.28	62	104.703	10	104.703	10	104.703	13	104.703	0
125.163	0	125.163	4	125.163	3	125.163	12	125.163	0	125.163	0	125.163	0	125.163	6	125.163	0	125.163	0	125.163	3	125.163	0	105.287	68	165.944	27	105.287	18	105.287	63	104.709	4	104.709	28	104.709	9	104.709	0
125.171	0	125.171	1	125.171	3	125.171	3	125.171	0	125.171	0	125.171	0	125.171	0	125.171	0	125.171	0	125.171	8	125.171	2	105.294	57	165.952	13	105.294	7	105.294	60	104.716	0	104.716	15	104.716	8	104.716	0
125.178	0	125.178	1	125.178	1	125.178	1	125.178	0	125.178	0	125.178	0	125.178	1	125.178	0	125.178	0	125.178	1	125.178	10	105.3	65	165.961	24	105.3	1	105.3	48	104.722	0	104.722	6	104.722	15	104.722	0
125.185	0	125.185	0	125.185	2	125.185	4	125.185	0	125.185	0	125.185	0	125.185	0	125.185	0	125.185	0	125.185	5	125.185	2	105.307	59	165.969	45	105.307	0	105.307	24	104.729	0	104.729	17	104.729	24	104.729	8
125.192	0	125.192	2	125.192	4	125.192	3	125.192	0	125.192	0	125.192	0	125.192	2	125.192	0	125.192	0	125.192	7	125.192	4	105.313	80	165.977	17	105.313	6	105.313	4	104.735	0	104.735	10	104.735	18	104.735	8
125.199	0	125.199	2	125.199	6	125.199	3	125.199	0	125.199	0	125.199	0	125.199	2	125.199	0	125.199	0	125.199	11	125.199	4	105.32	43	165.985	17	105.32	5	105.32	14	104.742	12	104.742	55	104.742	10	104.742	27
125.207	0	125.207	2	125.207	8	125.207	4	125.207	0	125.207	0	125.207	0	125.207	0	125.207	0	125.207	0	125.207	4	125.207	3	105.327	30	165.994	18	105.327	3	105.327	15	104.749	5	104.749	20	104.749	7	104.749	16
125.214	0	125.214	8	125.214	12	125.214	1	125.214	0	125.214	0	125.214	0	125.214	1	125.214	0	125.214	0	125.214	0	125.214	4	105.333	48	166.002	31	105.333	3	105.333	6	104.755	0	104.755	7	104.755	6	104.755	7
125.221	0	125.221	8	125.221	8	125.221	3	125.221	0	125.221	0	125.221	0	125.221	1	125.221	0	125.221	0	125.221	4	125.221	2	105.34	53	166.01	10	105.34	4	105.34	39	104.762	0	104.762	10	104.762	46	104.762	2
125.228	0	125.228	4	125.228	7	125.228	10	125.228	0	125.228	0	125.228	0	125.228	2	125.228	0	125.228	0	125.228	3	125.228	0	105.347	52	166.018	3	105.347	4	105.347	67	104.768	0	104.768	12	104.768	58	104.768	9
125.236	0	125.236	2	125.236	3	125.236	9	125.236	0	125.236	0	125.236	0	125.236	3	125.236	0	125.236	0	125.236	3	125.236	4	105.353	87	166.027	0	105.353	11	105.353	27	104.775	0	104.775	10	104.775	48	104.775	14
125.243	0	125.243	0	125.243	4	125.243	7	125.243	0	125.243	0	125.243	0	125.243	2	125.243	0	125.243	0	125.243	17	125.243	3	105.36	75	166.035	0	105.36	8	105.36	27	104.781	7	104.781	0	104.781	64	104.781	7
125.25	0	125.25	0	125.25	1	125.25	4	125.25	0	125.25	0	125.25	0	125.25	0	125.25	0	125.25	0	125.25	12	125.25	0	105.366	81	166.043	5	105.366	4	105.366	25	104.788	3	104.788	9	104.788	52	104.788	6
125.257	0	125.257	0	125.257	0	125.257	4	125.257	0	125.257	0	125.257	0	125.257	4	125.257	0	125.257	0	125.257	4	125.257	2	105.373	75	166.051	22	105.373	50	105.373	22	104.795	0	104.795	5	104.795	65	104.795	5
125.264	0	125.264	3	125.264	0	125.264	1	125.264	0	125.264	0	125.264	0	125.264	13	125.264	0	125.264	0	125.264	4	125.264	4	105.38	71	166.06	9	105.38	28	105.38	9	104.801	3	104.801	5	104.801	52	104.801	1
125.272	0	125.272	5	125.272	0	125.272	2	125.272	0	125.272	0	125.272	0	125.272	5	125.272	0	125.272	0	125.272	2	125.272	0	105.386	88	166.068	4	105.386	35	105.386	16	104.808	4	104.808	1	104.808	32	104.808	0
125.279	0	125.279	0	125.279	1	125.279	3	125.279	0	125.279	0	125.279	0	125.279	4	125.279	0	125.279	0	125.279	11	125.279	8	105.393	65	166.076	4	105.393	18	105.393	20	104.814	5	104.814	3	104.814	46	104.814	3
125.286	0	125.286	0	125.286	4	125.286	0	125.286	0	125.286	0	125.286	0	125.286	0	125.286	0	125.286	0	125.286	9	125.286	3	105.399	61	166.085	2	105.399	2	105.399	26	104.821	0	104.821	9	104.821	27	104.821	5
125.293	0	125.293	5	125.293	0	125.293	0	125.293	0	125.293	0	125.293	0	125.293	0	125.293	0	125.293	0	125.293	5	125.293	6	105.406	94	166.093	1	105.406	6	105.406	34	104.827	0	104.827	14	104.827	20	104.827	4
125.3	0	125.3	5	125.3	0	125.3	0	125.3	0	125.3	0	125.3	0	125.3	0	125.3	0	125.3	0	125.3	0	125.3	1	105.413	62	166.101	0	105.413	32	105.413	29	104.834	0	104.834	11	104.834	33	104.834	1
125.308	0	125.308	3	125.308	0	125.308	0	125.308	0	125.308	0	125.308	0	125.308	6	125.308	0	125.308	0	125.308	1	125.308	4	105.419	80	166.109	0	105.419	24	105.419	9	104.841	0	104.841	12	104.841	19	104.841	0
125.315	0	125.315	0	125.315	0	125.315	1	125.315	0	125.315	0	125.315	0	125.315	6	125.315	0	125.315	0	125.315	5	125.315	0	105.426	124	166.118	0	105.426	11	105.426	7	104.847	2	104.847	12	104.847	11	104.847	0
125.322	0	125.322	0	125.322	6	125.322	0	125.322	0	125.322	0	125.322	0	125.322	0	125.322	0	125.322	0	125.322	7	125.322	0	105.433	145	166.126	0	105.433	4	105.433	25	104.854	11	104.854	4	104.854	12	104.854	0
125.329	0	125.329	0	125.329	1	125.329	1	125.329	0	125.329	0	125.329	0	125.329	3	125.329	0	125.329	0	125.329	0	125.329	0	105.439	180	166.134	0	105.439	0	105.439	16	104.86	5	104.86	12	104.86	27	104.86	0
125.336	1	125.336	0	125.336	7	125.336	0	125.336	0	125.336	0	125.336	0	125.336	11	125.336	0	125.336	0	125.336	2	125.336	0	105.446	124	166.142	2	105.446	0	105.446	13	104.867	0	104.867	13	104.867	48	104.867	16
125.344	1	125.344	0	125.344	0	125.344	2	125.344	0	125.344	0	125.344	0	125.344	4	125.344	0	125.344	0	125.344	8	125.344	1	105.452	117	166.151	0	105.452	0	105.452	3	104.873	1	104.873	8	104.873	50	104.873	19
125.351	0	125.351	1	125.351	0	125.351	1	125.351	0	125.351	0	125.351	0	125.351	4	125.351	0	125.351	0	125.351	1	125.351	0	105.459	102	166.159	0	105.459	0	105.459	1	104.88	13	104.88	38	104.88	39	104.88	16
125.358	0	125.358	0	125.358	0	125.358	0	125.358	0	125.358	0	125.358	0	125.358	1	125.358	0	125.358	0	125.358	2	125.358	0	105.466	119	166.167	17	105.466	9	105.466	7	104.886	3	104.886	27	104.886	38	104.886	3
125.365	0	125.365	0	125.365	0	125.365	0	125.365	0	125.365	0	125.365	0	125.365	0	125.365	0	125.365	0	125.365	5	125.365	2	105.472	87	166.176	12	105.472	21	105.472	20	104.893	0	104.893	12	104.893	61	104.893	6
125.372	0	125.372	0	125.372	0	125.372	0	125.372	0	125.372	0	125.372	0	125.372	0	125.372	0	125.372	0	125.372	12	125.372	9	105.479	81	166.184	4	105.479	24	105.479	24	104.9	0	104.9	21	104.9	76	104.9	21
125.38	0	125.38	0	125.38	5	125.38	0	125.38	0	125.38	0	125.38	0	125.38	0	125.38	0	125.38	0	125.38	3	125.38	4	105.486	132	166.192	36	105.486	28	105.486	9	104.906	0	104.906	13	104.906	44	104.906	8
125.387	0	125.387	0	125.387	4	125.387	2	125.387	0	125.387	0	125.387	0	125.387	1	125.387	0	125.387	0	125.387	4	125.387	5	105.492	119	166.2	19	105.492	33	105.492	6	104.913	0	104.913	11	104.913	25	104.913	14
125.394	0	125.394	0	125.394	0	125.394	7	125.394	0	125.394	0	125.394	0	125.394	4	125.394	0	125.394	0	125.394	3	125.394	1	105.499	82	166.209	21	105.499	17	105.499	28	104.919	1	104.919	9	104.919	17	104.919	15
125.401	0	125.401	0	125.401	0	125.401	4	125.401	0	125.401	0	125.401	0	125.401	6	125.401	0	125.401	0	125.401	1	125.401	0	105.505	76	166.217	22	105.505	16	105.505	13	104.926	4	104.926	47	104.926	15	104.926	17
125.408	0	125.408	1	125.408	1	125.408	0	125.408	0	125.408	0	125.408	0	125.408	0	125.408	0	125.408	0	125.408	1	125.408	2	105.512	76	166.225	38	105.512	3	105.512	15	104.932	9	104.932	29	104.932	26	104.932	6
125.416	0	125.416	5	125.416	0	125.416	0	125.416	0	125.416	0	125.416	0	125.416	0	125.416	0	125.416	0	125.416	2	125.416	1	105.519	94	166.233	63	105.519	9	105.519	56	104.939	0	104.939	5	104.939	24	104.939	3
125.423	0	125.423	0	125.423	0	125.423	3	125.423	0	125.423	0	125.423	0	125.423	1	125.423	0	125.423	0	125.423	12	125.423	14	105.525	76	166.242	31	105.525	6	105.525	38	104.946	5	104.946	21	104.946	12	104.946	34
125.43	0	125.43	0	125.43	0	125.43	6	125.43	0	125.43	0	125.43	0	125.43	4	125.43	0	125.43	0	125.43	11	125.43	4	105.532	88	166.25	34	105.532	5	105.532	14	104.952	14	104.952	25	104.952	17	104.952	27
125.437	1	125.437	0	125.437	0	125.437	3	125.437	0	125.437	0	125.437	0	125.437	1	125.437	0	125.437	0	125.437	2	125.437	3	105.539	83	166.258	35	105.539	15	105.539	18	104.959	9	104.959	20	104.959	19	104.959	8
125.444	0	125.444	0	125.444	3	125.444	2	125.444	0	125.444	0	125.444	0	125.444	0	125.444	0	125.444	0	125.444	0	125.444	0	105.545	70	166.267	12	105.545	9	105.545	19	104.965	2	104.965	24	104.965	23	104.965	5
125.452	0	125.452	2	125.452	0	125.452	2	125.452	0	125.452	0	125.452	1	125.452	0	125.452	0	125.452	0	125.452	3	125.452	2	105.552	82	166.275	15	105.552	6	105.552	18	104.972	1	104.972	26	104.972	15	104.972	12
125.459	0	125.459	11	125.459	0	125.459	0	125.459	0	125.459	0	125.459	0	125.459	3	125.459	0	125.459	0	125.459	8	125.459	0	105.558	61	166.283	6	105.558	9	105.558	22	104.978	0	104.978	26	104.978	15	104.978	2
125.466	0	125.466	3	125.466	0	125.466	0	125.466	0	125.466	0	125.466	0	125.466	5	125.466	0	125.466	0	125.466	0	125.466	1	105.565	77	166.291	0	105.565	9	105.565	34	104.985	0	104.985	7	104.985	27	104.985	12
125.473	0	125.473	1	125.473	0	125.473	1	125.473	0	125.473	0	125.473	0	125.473	3	125.473	0	125.473	0	125.473	0	125.473	0	105.572	94	166.3	0	105.572	18	105.572	21	104.992	0	104.992	0	104.992	19	104.992	3
125.481	0	125.481	0	125.481	0	125.481	0	125.481	0	125.481	0	125.481	0	125.481	7	125.481	0	125.481	0	125.481	1	125.481	0	105.578	67	166.308	0	105.578	32	105.578	33	104.998	0	104.998	5	104.998	35	104.998	3
125.488	0	125.488	0	125.488	0	125.488	0	125.488	0	125.488	0	125.488	1	125.488	4	125.488	0	125.488	0	125.488	2	125.488	0	105.585	50	166.316	12	105.585	52	105.585	34	105.005	0	105.005	28	105.005	19	105.005	11
125.495	0	125.495	0	125.495	0	125.495	0	125.495	0	125.495	0	125.495	0	125.495	0	125.495	0	125.495	0	125.495	5	125.495	2	105.592	46	166.324	4	105.592	73	105.592	46	105.011	0	105.011	32	105.011	14	105.011	20
125.502	0	125.502	0	125.502	0	125.502	4	125.502	0	125.502	0	125.502	0	125.502	0	125.502	0	125.502	0	125.502	7	125.502	2	105.598	51	166.333	14	105.598	92	105.598	48	105.018	16	105.018	41	105.018	19	105.018	14
125.509	0	125.509	0	125.509	2	125.509	4	125.509	0	125.509	0	125.509	0	125.509	2	125.509	0	125.509	0	125.509	7	125.509	0	105.605	45	166.341	21	105.605	148	105.605	47	105.024	7	105.024	32	105.024	11	105.024	4
125.517	0	125.517	0	125.517	2	125.517	0	125.517	0	125.517	0	125.517	0	125.517	1	125.517	0	125.517	0	125.517	2	125.517	0	105.611	75	166.349	54	105.611	413	105.611	68	105.031	1	105.031	16	105.031	12	105.031	0
125.524	0	125.524	2	125.524	3	125.524	2	125.524	0	125.524	0	125.524	0	125.524	0	125.524	0	125.524	0	125.524	1	125.524	6	105.618	63	166.358	47	105.618	482	105.618	86	105.038	0	105.038	20	105.038	9	105.038	1
125.531	0	125.531	0	125.531	4	125.531	19	125.531	0	125.531	0	125.531	0	125.531	0	125.531	0	125.531	0	125.531	2	125.531	0	105.625	87	166.366	41	105.625	559	105.625	97	105.044	0	105.044	21	105.044	5	105.044	1
125.538	1	125.538	2	125.538	0	125.538	9	125.538	0	125.538	0	125.538	0	125.538	1	125.538	0	125.538	0	125.538	4	125.538	0	105.631	94	166.374	35	105.631	542	105.631	94	105.051	0	105.051	34	105.051	4	105.051	0
125.545	0	125.545	0	125.545	1	125.545	0	125.545	0	125.545	0	125.545	0	125.545	0	125.545	0	125.545	0	125.545	1	125.545	1	105.638	82	166.382	23	105.638	666	105.638	93	105.057	0	105.057	27	105.057	8	105.057	0
125.553	0	125.553	0	125.553	1	125.553	1	125.553	0	125.553	0	125.553	0	125.553	10	125.553	0	125.553	0	125.553	1	125.553	0	105.645	58	166.391	10	105.645	614	105.645	114	105.064	9	105.064	23	105.064	19	105.064	2
125.56	0	125.56	3	125.56	0	125.56	1	125.56	0	125.56	0	125.56	0	125.56	4	125.56	0	125.56	0	125.56	0	125.56	3	105.651	47	166.399	2	105.651	502	105.651	92	105.07	8	105.07	19	105.07	11	105.07	0
125.567	0	125.567	1	125.567	0	125.567	1	125.567	0	125.567	0	125.567	0	125.567	0	125.567	0	125.567	0	125.567	0	125.567	3	105.658	50	166.407	0	105.658	425	105.658	130	105.077	1	105.077	20	105.077	4	105.077	5
125.574	0	125.574	1	125.574	0	125.574	1	125.574	0	125.574	0	125.574	0	125.574	4	125.574	0	125.574	0	125.574	0	125.574	0	105.664	52	166.415	0	105.664	419	105.664	111	105.084	0	105.084	12	105.084	3	105.084	7
125.581	0	125.581	2	125.581	3	125.581	0	125.581	0	125.581	0	125.581	0	125.581	6	125.581	0	125.581	0	125.581	0	125.581	0	105.671	49	166.424	0	105.671	325	105.671	114	105.09	0	105.09	9	105.09	2	105.09	7
125.589	0	125.589	5	125.589	3	125.589	0	125.589	0	125.589	0	125.589	0	125.589	3	125.589	0	125.589	0	125.589	4	125.589	1	105.678	95	166.432	14	105.678	329	105.678	137	105.097	0	105.097	18	105.097	1	105.097	8
125.596	0	125.596	0	125.596	0	125.596	1	125.596	0	125.596	0	125.596	0	125.596	1	125.596	0	125.596	0	125.596	2	125.596	0	105.684	71	166.44	2	105.684	253	105.684	120	105.103	0	105.103	18	105.103	2	105.103	21
125.603	0	125.603	0	125.603	0	125.603	1	125.603	0	125.603	0	125.603	0	125.603	1	125.603	0	125.603	0	125.603	2	125.603	4	105.691	81	166.449	0	105.691	136	105.691	78	105.11	0	105.11	5	105.11	1	105.11	8
125.61	0	125.61	0	125.61	7	125.61	0	125.61	0	125.61	0	125.61	0	125.61	5	125.61	0	125.61	0	125.61	0	125.61	11	105.698	99	166.457	0	105.698	62	105.698	87	105.117	0	105.117	1	105.117	0	105.117	5
125.618	0	125.618	0	125.618	0	125.618	0	125.618	0	125.618	0	125.618	0	125.618	0	125.618	0	125.618	0	125.618	3	125.618	6	105.704	61	166.465	0	105.704	72	105.704	81	105.123	9	105.123	13	105.123	0	105.123	61
125.625	0	125.625	1	125.625	1	125.625	6	125.625	0	125.625	0	125.625	0	125.625	0	125.625	0	125.625	0	125.625	10	125.625	3	105.711	66	166.473	0	105.711	81	105.711	45	105.13	53	105.13	17	105.13	2	105.13	89
125.632	0	125.632	4	125.632	0	125.632	7	125.632	0	125.632	0	125.632	0	125.632	0	125.632	0	125.632	0	125.632	8	125.632	0	105.718	88	166.482	0	105.718	52	105.718	62	105.136	142	105.136	37	105.136	1	105.136	140
125.639	4	125.639	5	125.639	1	125.639	3	125.639	0	125.639	0	125.639	0	125.639	1	125.639	0	125.639	0	125.639	1	125.639	3	105.724	62	166.49	6	105.724	50	105.724	50	105.143	183	105.143	35	105.143	33	105.143	302
125.646	2	125.646	1	125.646	0	125.646	1	125.646	0	125.646	0	125.646	0	125.646	1	125.646	0	125.646	0	125.646	0	125.646	2	105.731	133	166.498	17	105.731	59	105.731	57	105.149	259	105.149	23	105.149	35	105.149	420
125.654	0	125.654	0	125.654	0	125.654	1	125.654	0	125.654	0	125.654	0	125.654	3	125.654	0	125.654	0	125.654	6	125.654	10	105.737	145	166.507	8	105.737	57	105.737	32	105.156	338	105.156	34	105.156	15	105.156	843
125.661	0	125.661	0	125.661	0	125.661	0	125.661	0	125.661	0	125.661	0	125.661	3	125.661	0	125.661	4	125.661	2	125.661	7	105.744	111	166.515	1	105.744	86	105.744	18	105.163	384	105.163	35	105.163	48	105.163	1314
125.668	0	125.668	2	125.668	0	125.668	3	125.668	0	125.668	0	125.668	0	125.668	2	125.668	0	125.668	0	125.668	1	125.668	0	105.751	77	166.523	0	105.751	93	105.751	31	105.169	519	105.169	53	105.169	70	105.169	1985
125.675	0	125.675	0	125.675	0	125.675	2	125.675	0	125.675	0	125.675	0	125.675	1	125.675	0	125.675	0	125.675	0	125.675	0	105.757	59	166.531	0	105.757	85	105.757	34	105.176	575	105.176	132	105.176	46	105.176	3331
125.682	0	125.682	3	125.682	1	125.682	0	125.682	0	125.682	0	125.682	0	125.682	2	125.682	0	125.682	0	125.682	0	125.682	0	105.764	98	166.54	0	105.764	95	105.764	19	105.182	558	105.182	202	105.182	33	105.182	5155
125.69	0	125.69	3	125.69	0	125.69	0	125.69	0	125.69	0	125.69	0	125.69	2	125.69	0	125.69	0	125.69	3	125.69	3	105.771	65	166.548	0	105.771	78	105.771	7	105.189	585	105.189	314	105.189	50	105.189	6889
125.697	0	125.697	0	125.697	0	125.697	0	125.697	0	125.697	0	125.697	0	125.697	0	125.697	0	125.697	0	125.697	0	125.697	11	105.777	63	166.556	0	105.777	36	105.777	14	105.195	777	105.195	340	105.195	38	105.195	8937
125.704	0	125.704	0	125.704	0	125.704	4	125.704	0	125.704	0	125.704	0	125.704	0	125.704	0	125.704	0	125.704	8	125.704	7	105.784	94	166.564	0	105.784	58	105.784	27	105.202	988	105.202	334	105.202	40	105.202	10219
125.711	0	125.711	2	125.711	0	125.711	0	125.711	0	125.711	0	125.711	0	125.711	0	125.711	0	125.711	0	125.711	6	125.711	1	105.79	122	166.573	0	105.79	74	105.79	42	105.209	1050	105.209	438	105.209	89	105.209	11273
125.719	0	125.719	6	125.719	0	125.719	7	125.719	0	125.719	0	125.719	0	125.719	1	125.719	0	125.719	0	125.719	0	125.719	2	105.797	128	166.581	0	105.797	57	105.797	54	105.215	990	105.215	704	105.215	86	105.215	12658
125.726	0	125.726	1	125.726	9	125.726	6	125.726	0	125.726	0	125.726	0	125.726	2	125.726	0	125.726	0	125.726	4	125.726	1	105.804	141	166.589	0	105.804	54	105.804	31	105.222	908	105.222	815	105.222	138	105.222	13527
125.733	0	125.733	0	125.733	7	125.733	3	125.733	0	125.733	0	125.733	0	125.733	0	125.733	0	125.733	0	125.733	7	125.733	1	105.81	147	166.598	0	105.81	49	105.81	31	105.228	937	105.228	915	105.228	122	105.228	14289
125.74	0	125.74	1	125.74	3	125.74	0	125.74	0	125.74	0	125.74	0	125.74	3	125.74	2	125.74	0	125.74	1	125.74	3	105.817	125	166.606	0	105.817	36	105.817	26	105.235	1027	105.235	937	105.235	109	105.235	14283
125.747	0	125.747	5	125.747	2	125.747	0	125.747	0	125.747	0	125.747	0	125.747	1	125.747	0	125.747	0	125.747	4	125.747	1	105.824	143	166.614	0	105.824	23	105.824	15	105.241	819	105.241	878	105.241	72	105.241	12851
125.755	0	125.755	0	125.755	3	125.755	0	125.755	0	125.755	0	125.755	0	125.755	4	125.755	0	125.755	0	125.755	14	125.755	2	105.83	136	166.622	3	105.83	19	105.83	7	105.248	668	105.248	813	105.248	81	105.248	11178
125.762	0	125.762	0	125.762	1	125.762	0	125.762	0	125.762	0	125.762	0	125.762	1	125.762	0	125.762	0	125.762	8	125.762	0	105.837	141	166.631	0	105.837	59	105.837	9	105.255	609	105.255	547	105.255	76	105.255	9623
125.769	0	125.769	0	125.769	2	125.769	0	125.769	0	125.769	0	125.769	0	125.769	0	125.769	0	125.769	0	125.769	6	125.769	1	105.844	98	166.639	0	105.844	26	105.844	10	105.261	510	105.261	371	105.261	43	105.261	8171
125.776	0	125.776	3	125.776	0	125.776	2	125.776	0	125.776	0	125.776	0	125.776	2	125.776	0	125.776	0	125.776	18	125.776	7	105.85	77	166.647	0	105.85	9	105.85	16	105.268	478	105.268	207	105.268	66	105.268	7074
125.784	0	125.784	4	125.784	0	125.784	0	125.784	0	125.784	0	125.784	0	125.784	7	125.784	0	125.784	0	125.784	6	125.784	12	105.857	105	166.656	0	105.857	30	105.857	28	105.274	365	105.274	130	105.274	33	105.274	6370
125.791	0	125.791	1	125.791	0	125.791	0	125.791	0	125.791	0	125.791	0	125.791	2	125.791	0	125.791	0	125.791	1	125.791	2	105.863	73	166.664	0	105.863	17	105.863	18	105.281	187	105.281	76	105.281	15	105.281	5208
125.798	0	125.798	0	125.798	0	125.798	0	125.798	0	125.798	0	125.798	0	125.798	1	125.798	0	125.798	0	125.798	10	125.798	7	105.87	92	166.672	0	105.87	4	105.87	6	105.288	88	105.288	112	105.288	8	105.288	3961
125.805	0	125.805	0	125.805	0	125.805	1	125.805	0	125.805	0	125.805	0	125.805	14	125.805	0	125.805	0	125.805	6	125.805	2	105.877	112	166.68	2	105.877	0	105.877	19	105.294	36	105.294	90	105.294	19	105.294	3013
125.812	0	125.812	0	125.812	3	125.812	4	125.812	0	125.812	0	125.812	0	125.812	4	125.812	0	125.812	0	125.812	1	125.812	4	105.883	98	166.689	0	105.883	9	105.883	47	105.301	46	105.301	75	105.301	9	105.301	2404
125.82	0	125.82	0	125.82	2	125.82	3	125.82	0	125.82	0	125.82	0	125.82	11	125.82	0	125.82	0	125.82	5	125.82	2	105.89	95	166.697	3	105.89	23	105.89	28	105.307	15	105.307	43	105.307	3	105.307	2216
125.827	0	125.827	0	125.827	2	125.827	4	125.827	0	125.827	0	125.827	0	125.827	8	125.827	0	125.827	0	125.827	7	125.827	4	105.897	69	166.705	0	105.897	29	105.897	21	105.314	5	105.314	37	105.314	4	105.314	2059
125.834	0	125.834	0	125.834	6	125.834	1	125.834	0	125.834	0	125.834	0	125.834	6	125.834	0	125.834	0	125.834	2	125.834	13	105.903	63	166.714	0	105.903	14	105.903	34	105.32	0	105.32	28	105.32	11	105.32	1876
125.841	0	125.841	0	125.841	10	125.841	13	125.841	0	125.841	5	125.841	0	125.841	8	125.841	0	125.841	0	125.841	6	125.841	10	105.91	65	166.722	0	105.91	11	105.91	46	105.327	0	105.327	27	105.327	8	105.327	1713
125.848	0	125.848	1	125.848	6	125.848	4	125.848	0	125.848	8	125.848	0	125.848	2	125.848	0	125.848	0	125.848	22	125.848	7	105.917	61	166.73	0	105.917	26	105.917	63	105.334	7	105.334	74	105.334	1	105.334	1501
125.856	0	125.856	4	125.856	9	125.856	8	125.856	0	125.856	2	125.856	0	125.856	3	125.856	0	125.856	0	125.856	8	125.856	1	105.923	86	166.738	0	105.923	19	105.923	42	105.34	18	105.34	73	105.34	0	105.34	1330
125.863	0	125.863	19	125.863	4	125.863	6	125.863	0	125.863	0	125.863	0	125.863	5	125.863	4	125.863	0	125.863	8	125.863	7	105.93	138	166.747	3	105.93	16	105.93	17	105.347	11	105.347	49	105.347	0	105.347	1263
125.87	2	125.87	12	125.87	3	125.87	15	125.87	0	125.87	0	125.87	0	125.87	5	125.87	1	125.87	0	125.87	6	125.87	22	105.936	136	166.755	18	105.936	9	105.936	33	105.353	1	105.353	21	105.353	0	105.353	1215
125.877	1	125.877	2	125.877	9	125.877	13	125.877	0	125.877	0	125.877	0	125.877	11	125.877	0	125.877	0	125.877	12	125.877	10	105.943	129	166.763	15	105.943	17	105.943	37	105.36	0	105.36	2	105.36	3	105.36	1100
125.885	0	125.885	4	125.885	0	125.885	6	125.885	0	125.885	0	125.885	0	125.885	3	125.885	3	125.885	0	125.885	10	125.885	6	105.95	109	166.772	3	105.95	22	105.95	36	105.367	0	105.367	18	105.367	1	105.367	1007
125.892	2	125.892	3	125.892	5	125.892	15	125.892	0	125.892	0	125.892	0	125.892	13	125.892	2	125.892	0	125.892	2	125.892	7	105.956	125	166.78	0	105.956	27	105.956	48	105.373	0	105.373	13	105.373	0	105.373	1010
125.899	1	125.899	4	125.899	10	125.899	16	125.899	0	125.899	0	125.899	0	125.899	7	125.899	0	125.899	2	125.899	7	125.899	3	105.963	74	166.788	0	105.963	19	105.963	50	105.38	10	105.38	16	105.38	2	105.38	966
125.906	0	125.906	5	125.906	5	125.906	10	125.906	0	125.906	0	125.906	0	125.906	9	125.906	0	125.906	4	125.906	16	125.906	7	105.97	30	166.796	0	105.97	23	105.97	42	105.386	3	105.386	15	105.386	10	105.386	944
125.913	0	125.913	2	125.913	5	125.913	20	125.913	1	125.913	0	125.913	0	125.913	2	125.913	0	125.913	3	125.913	13	125.913	13	105.976	40	166.805	0	105.976	11	105.976	15	105.393	0	105.393	18	105.393	9	105.393	874
125.921	0	125.921	5	125.921	6	125.921	8	125.921	1	125.921	0	125.921	0	125.921	5	125.921	0	125.921	0	125.921	3	125.921	6	105.983	46	166.813	0	105.983	12	105.983	22	105.399	1	105.399	25	105.399	19	105.399	739
125.928	2	125.928	3	125.928	12	125.928	5	125.928	0	125.928	0	125.928	0	125.928	6	125.928	0	125.928	1	125.928	4	125.928	7	105.99	70	166.821	1	105.99	12	105.99	16	105.406	16	105.406	13	105.406	17	105.406	635
125.935	1	125.935	5	125.935	2	125.935	18	125.935	0	125.935	0	125.935	0	125.935	12	125.935	0	125.935	0	125.935	0	125.935	3	105.996	71	166.83	0	105.996	10	105.996	3	105.413	17	105.413	11	105.413	9	105.413	498
125.942	0	125.942	0	125.942	3	125.942	13	125.942	1	125.942	0	125.942	0	125.942	9	125.942	0	125.942	0	125.942	3	125.942	12	106.003	74	166.838	0	106.003	13	106.003	3	105.419	4	105.419	35	105.419	21	105.419	365
125.95	3	125.95	4	125.95	3	125.95	11	125.95	0	125.95	0	125.95	0	125.95	15	125.95	0	125.95	0	125.95	1	125.95	2	106.009	79	166.846	4	106.009	2	106.009	23	105.426	3	105.426	70	105.426	9	105.426	279
125.957	1	125.957	0	125.957	12	125.957	7	125.957	0	125.957	0	125.957	0	125.957	5	125.957	0	125.957	0	125.957	2	125.957	1	106.016	63	166.854	31	106.016	1	106.016	33	105.432	9	105.432	56	105.432	3	105.432	250
125.964	2	125.964	3	125.964	7	125.964	6	125.964	0	125.964	0	125.964	0	125.964	5	125.964	0	125.964	0	125.964	1	125.964	9	106.023	60	166.863	9	106.023	0	106.023	21	105.439	2	105.439	30	105.439	4	105.439	218
125.971	0	125.971	0	125.971	4	125.971	6	125.971	0	125.971	0	125.971	0	125.971	19	125.971	0	125.971	1	125.971	1	125.971	9	106.029	101	166.871	1	106.029	23	106.029	22	105.446	0	105.446	35	105.446	11	105.446	205
125.979	0	125.979	6	125.979	2	125.979	5	125.979	0	125.979	0	125.979	0	125.979	7	125.979	0	125.979	0	125.979	1	125.979	8	106.036	73	166.879	0	106.036	22	106.036	7	105.452	0	105.452	23	105.452	8	105.452	200
125.986	0	125.986	6	125.986	0	125.986	1	125.986	0	125.986	0	125.986	0	125.986	4	125.986	0	125.986	0	125.986	4	125.986	6	106.043	84	166.888	0	106.043	5	106.043	15	105.459	0	105.459	36	105.459	7	105.459	197
125.993	0	125.993	1	125.993	4	125.993	4	125.993	0	125.993	0	125.993	0	125.993	6	125.993	0	125.993	0	125.993	0	125.993	1	106.049	57	166.896	0	106.049	1	106.049	4	105.465	3	105.465	22	105.465	10	105.465	182
126	0	126	3	126	5	126	3	126	0	126	0	126	0	126	3	126	0	126	0	126	4	126	6	106.056	65	166.904	2	106.056	36	106.056	1	105.472	2	105.472	23	105.472	5	105.472	213
126.007	0	126.007	2	126.007	6	126.007	6	126.007	0	126.007	0	126.007	0	126.007	3	126.007	0	126.007	5	126.007	20	126.007	9	106.063	70	166.912	11	106.063	30	106.063	1	105.478	9	105.478	40	105.478	13	105.478	272
126.015	0	126.015	0	126.015	8	126.015	10	126.015	0	126.015	0	126.015	1	126.015	6	126.015	0	126.015	8	126.015	5	126.015	3	106.069	57	166.921	8	106.069	10	106.069	12	105.485	10	105.485	40	105.485	8	105.485	298
126.022	1	126.022	2	126.022	10	126.022	5	126.022	0	126.022	0	126.022	3	126.022	0	126.022	0	126.022	1	126.022	2	126.022	4	106.076	54	166.929	2	106.076	7	106.076	13	105.492	22	105.492	41	105.492	3	105.492	266
126.029	0	126.029	0	126.029	5	126.029	6	126.029	0	126.029	0	126.029	0	126.029	5	126.029	0	126.029	0	126.029	3	126.029	7	106.083	64	166.937	0	106.083	10	106.083	16	105.498	11	105.498	29	105.498	2	105.498	318
126.036	6	126.036	2	126.036	1	126.036	10	126.036	0	126.036	0	126.036	0	126.036	8	126.036	0	126.036	0	126.036	6	126.036	1	106.089	75	166.946	23	106.089	21	106.089	5	105.505	17	105.505	32	105.505	5	105.505	307
126.044	4	126.044	7	126.044	5	126.044	7	126.044	0	126.044	0	126.044	0	126.044	1	126.044	0	126.044	0	126.044	3	126.044	7	106.096	57	166.954	21	106.096	3	106.096	4	105.511	18	105.511	9	105.511	9	105.511	298
126.051	3	126.051	3	126.051	1	126.051	1	126.051	0	126.051	0	126.051	0	126.051	5	126.051	0	126.051	0	126.051	0	126.051	7	106.102	57	166.962	7	106.102	1	106.102	24	105.518	3	105.518	6	105.518	13	105.518	256
126.058	0	126.058	2	126.058	6	126.058	7	126.058	0	126.058	0	126.058	0	126.058	6	126.058	0	126.058	0	126.058	0	126.058	8	106.109	66	166.971	4	106.109	4	106.109	21	105.525	1	105.525	8	105.525	7	105.525	247
126.065	0	126.065	2	126.065	3	126.065	2	126.065	0	126.065	0	126.065	3	126.065	6	126.065	0	126.065	0	126.065	0	126.065	4	106.116	74	166.979	0	106.116	3	106.116	22	105.531	7	105.531	20	105.531	4	105.531	245
126.072	0	126.072	0	126.072	4	126.072	0	126.072	0	126.072	0	126.072	0	126.072	1	126.072	0	126.072	0	126.072	0	126.072	2	106.122	61	166.987	0	106.122	8	106.122	6	105.538	3	105.538	10	105.538	4	105.538	183
126.08	0	126.08	0	126.08	1	126.08	3	126.08	0	126.08	0	126.08	0	126.08	0	126.08	0	126.08	0	126.08	0	126.08	9	106.129	34	166.995	0	106.129	0	106.129	21	105.544	0	105.544	12	105.544	10	105.544	138
126.087	2	126.087	5	126.087	0	126.087	0	126.087	3	126.087	0	126.087	0	126.087	1	126.087	0	126.087	0	126.087	5	126.087	3	106.136	95	167.004	0	106.136	0	106.136	23	105.551	0	105.551	33	105.551	5	105.551	137
126.094	0	126.094	0	126.094	1	126.094	2	126.094	0	126.094	0	126.094	0	126.094	1	126.094	0	126.094	0	126.094	3	126.094	1	106.142	84	167.012	0	106.142	12	106.142	18	105.558	5	105.558	8	105.558	1	105.558	90
126.101	0	126.101	7	126.101	1	126.101	2	126.101	0	126.101	0	126.101	0	126.101	0	126.101	0	126.101	0	126.101	3	126.101	4	106.149	55	167.02	16	106.149	15	106.149	51	105.564	1	105.564	22	105.564	1	105.564	77
126.109	0	126.109	1	126.109	3	126.109	0	126.109	0	126.109	0	126.109	0	126.109	2	126.109	0	126.109	7	126.109	0	126.109	2	106.156	60	167.029	5	106.156	7	106.156	32	105.571	0	105.571	24	105.571	0	105.571	65
126.116	0	126.116	1	126.116	3	126.116	0	126.116	0	126.116	0	126.116	0	126.116	0	126.116	0	126.116	9	126.116	0	126.116	0	106.162	59	167.037	0	106.162	28	106.162	32	105.577	9	105.577	54	105.577	4	105.577	66
126.123	0	126.123	1	126.123	1	126.123	0	126.123	0	126.123	0	126.123	0	126.123	0	126.123	0	126.123	2	126.123	2	126.123	2	106.169	106	167.045	0	106.169	23	106.169	26	105.584	4	105.584	37	105.584	0	105.584	68
126.13	0	126.13	0	126.13	0	126.13	0	126.13	0	126.13	0	126.13	0	126.13	0	126.13	0	126.13	0	126.13	1	126.13	11	106.176	89	167.053	0	106.176	13	106.176	24	105.59	1	105.59	55	105.59	0	105.59	52
126.137	0	126.137	0	126.137	0	126.137	0	126.137	0	126.137	0	126.137	0	126.137	8	126.137	0	126.137	0	126.137	11	126.137	5	106.182	53	167.062	0	106.182	3	106.182	26	105.597	0	105.597	31	105.597	0	105.597	44
126.145	0	126.145	0	126.145	0	126.145	0	126.145	0	126.145	0	126.145	0	126.145	14	126.145	0	126.145	0	126.145	6	126.145	0	106.189	70	167.07	3	106.189	0	106.189	18	105.604	5	105.604	28	105.604	6	105.604	50
126.152	0	126.152	8	126.152	0	126.152	1	126.152	0	126.152	0	126.152	0	126.152	4	126.152	0	126.152	0	126.152	1	126.152	0	106.195	52	167.078	0	106.195	22	106.195	21	105.61	9	105.61	38	105.61	13	105.61	57
126.159	0	126.159	7	126.159	8	126.159	0	126.159	0	126.159	0	126.159	0	126.159	0	126.159	0	126.159	0	126.159	1	126.159	0	106.202	33	167.087	0	106.202	44	106.202	3	105.617	4	105.617	30	105.617	5	105.617	50
126.166	1	126.166	0	126.166	0	126.166	0	126.166	0	126.166	0	126.166	0	126.166	0	126.166	0	126.166	0	126.166	0	126.166	5	106.209	60	167.095	20	106.209	19	106.209	0	105.623	0	105.623	16	105.623	2	105.623	61
126.174	0	126.174	8	126.174	1	126.174	0	126.174	0	126.174	0	126.174	0	126.174	0	126.174	0	126.174	0	126.174	1	126.174	4	106.215	67	167.103	42	106.215	3	106.215	0	105.63	0	105.63	30	105.63	14	105.63	55
126.181	0	126.181	3	126.181	0	126.181	0	126.181	0	126.181	0	126.181	0	126.181	1	126.181	0	126.181	0	126.181	2	126.181	6	106.222	60	167.112	23	106.222	15	106.222	1	105.637	0	105.637	52	105.637	26	105.637	46
126.188	0	126.188	0	126.188	0	126.188	2	126.188	0	126.188	0	126.188	0	126.188	0	126.188	0	126.188	0	126.188	0	126.188	2	106.229	84	167.12	14	106.229	23	106.229	2	105.643	0	105.643	21	105.643	9	105.643	36
126.195	0	126.195	0	126.195	4	126.195	0	126.195	0	126.195	0	126.195	0	126.195	4	126.195	0	126.195	0	126.195	0	126.195	4	106.235	73	167.128	22	106.235	6	106.235	17	105.65	0	105.65	17	105.65	27	105.65	50
126.203	0	126.203	0	126.203	0	126.203	0	126.203	0	126.203	0	126.203	0	126.203	3	126.203	0	126.203	0	126.203	3	126.203	0	106.242	43	167.136	33	106.242	3	106.242	17	105.656	0	105.656	20	105.656	24	105.656	84
126.21	0	126.21	0	126.21	0	126.21	8	126.21	0	126.21	0	126.21	0	126.21	1	126.21	0	126.21	0	126.21	1	126.21	1	106.249	75	167.145	35	106.249	27	106.249	4	105.663	0	105.663	8	105.663	11	105.663	45
126.217	7	126.217	0	126.217	0	126.217	6	126.217	0	126.217	0	126.217	0	126.217	0	126.217	0	126.217	0	126.217	2	126.217	0	106.255	59	167.153	29	106.255	20	106.255	16	105.67	3	105.67	13	105.67	3	105.67	32
126.224	7	126.224	0	126.224	0	126.224	0	126.224	0	126.224	0	126.224	0	126.224	2	126.224	0	126.224	0	126.224	0	126.224	3	106.262	70	167.161	91	106.262	9	106.262	35	105.676	4	105.676	16	105.676	4	105.676	47
126.231	0	126.231	0	126.231	3	126.231	0	126.231	0	126.231	0	126.231	0	126.231	0	126.231	0	126.231	0	126.231	1	126.231	0	106.269	128	167.17	57	106.269	13	106.269	15	105.683	8	105.683	18	105.683	14	105.683	26
126.239	0	126.239	5	126.239	2	126.239	1	126.239	0	126.239	0	126.239	0	126.239	0	126.239	0	126.239	0	126.239	2	126.239	1	106.275	118	167.178	99	106.275	29	106.275	8	105.689	4	105.689	17	105.689	8	105.689	12
126.246	0	126.246	4	126.246	0	126.246	1	126.246	0	126.246	0	126.246	0	126.246	0	126.246	0	126.246	0	126.246	6	126.246	5	106.282	84	167.186	151	106.282	16	106.282	2	105.696	0	105.696	4	105.696	3	105.696	39
126.253	0	126.253	2	126.253	0	126.253	3	126.253	0	126.253	0	126.253	0	126.253	3	126.253	0	126.253	0	126.253	6	126.253	6	106.289	53	167.194	76	106.289	3	106.289	1	105.703	3	105.703	6	105.703	7	105.703	23
126.26	0	126.26	2	126.26	0	126.26	0	126.26	0	126.26	0	126.26	0	126.26	2	126.26	0	126.26	0	126.26	0	126.26	2	106.295	58	167.203	131	106.295	9	106.295	9	105.709	1	105.709	5	105.709	12	105.709	2
126.268	0	126.268	0	126.268	0	126.268	0	126.268	0	126.268	0	126.268	0	126.268	0	126.268	0	126.268	0	126.268	0	126.268	1	106.302	62	167.211	105	106.302	21	106.302	11	105.716	0	105.716	11	105.716	14	105.716	12
126.275	0	126.275	0	126.275	1	126.275	1	126.275	0	126.275	0	126.275	0	126.275	4	126.275	0	126.275	0	126.275	1	126.275	0	106.308	64	167.219	64	106.308	14	106.308	1	105.722	7	105.722	30	105.722	22	105.722	15
126.282	0	126.282	1	126.282	0	126.282	0	126.282	0	126.282	0	126.282	0	126.282	2	126.282	0	126.282	0	126.282	1	126.282	1	106.315	58	167.228	33	106.315	9	106.315	0	105.729	9	105.729	12	105.729	10	105.729	29
126.289	0	126.289	0	126.289	0	126.289	3	126.289	0	126.289	0	126.289	0	126.289	0	126.289	0	126.289	0	126.289	0	126.289	3	106.322	64	167.236	39	106.322	4	106.322	0	105.736	7	105.736	24	105.736	5	105.736	43
126.297	0	126.297	0	126.297	0	126.297	0	126.297	0	126.297	0	126.297	0	126.297	0	126.297	0	126.297	0	126.297	1	126.297	3	106.328	46	167.244	20	106.328	0	106.328	0	105.742	13	105.742	8	105.742	27	105.742	45
126.304	0	126.304	2	126.304	0	126.304	0	126.304	0	126.304	0	126.304	0	126.304	0	126.304	0	126.304	0	126.304	1	126.304	2	106.335	61	167.253	21	106.335	0	106.335	7	105.749	52	105.749	17	105.749	35	105.749	35
126.311	0	126.311	2	126.311	0	126.311	0	126.311	0	126.311	0	126.311	0	126.311	4	126.311	0	126.311	0	126.311	0	126.311	0	106.342	47	167.261	12	106.342	37	106.342	87	105.755	27	105.755	7	105.755	22	105.755	32
126.318	0	126.318	0	126.318	0	126.318	1	126.318	0	126.318	0	126.318	0	126.318	3	126.318	0	126.318	0	126.318	0	126.318	0	106.348	44	167.269	37	106.348	54	106.348	55	105.762	12	105.762	13	105.762	15	105.762	19
126.326	0	126.326	0	126.326	3	126.326	0	126.326	0	126.326	0	126.326	0	126.326	0	126.326	0	126.326	0	126.326	3	126.326	1	106.355	65	167.277	84	106.355	30	106.355	73	105.769	10	105.769	28	105.769	15	105.769	46
126.333	0	126.333	0	126.333	2	126.333	0	126.333	0	126.333	0	126.333	0	126.333	3	126.333	0	126.333	0	126.333	0	126.333	1	106.362	82	167.286	55	106.362	9	106.362	47	105.775	3	105.775	38	105.775	8	105.775	27
126.34	0	126.34	0	126.34	3	126.34	0	126.34	0	126.34	0	126.34	0	126.34	3	126.34	0	126.34	0	126.34	0	126.34	2	106.368	92	167.294	22	106.368	4	106.368	23	105.782	0	105.782	30	105.782	18	105.782	24
126.347	0	126.347	0	126.347	6	126.347	2	126.347	0	126.347	0	126.347	0	126.347	4	126.347	0	126.347	0	126.347	2	126.347	0	106.375	76	167.302	34	106.375	9	106.375	8	105.788	0	105.788	45	105.788	22	105.788	48
126.354	0	126.354	0	126.354	4	126.354	2	126.354	0	126.354	0	126.354	0	126.354	5	126.354	0	126.354	0	126.354	0	126.354	1	106.382	93	167.311	17	106.382	10	106.382	11	105.795	15	105.795	27	105.795	28	105.795	37
126.362	0	126.362	0	126.362	1	126.362	0	126.362	0	126.362	0	126.362	0	126.362	7	126.362	1	126.362	0	126.362	1	126.362	2	106.388	93	167.319	15	106.388	9	106.388	18	105.801	16	105.801	9	105.801	46	105.801	15
126.369	0	126.369	0	126.369	6	126.369	0	126.369	0	126.369	0	126.369	0	126.369	1	126.369	0	126.369	0	126.369	1	126.369	0	106.395	116	167.327	36	106.395	8	106.395	17	105.808	6	105.808	6	105.808	61	105.808	19
126.376	0	126.376	0	126.376	3	126.376	0	126.376	0	126.376	0	126.376	0	126.376	0	126.376	0	126.376	0	126.376	0	126.376	1	106.402	109	167.336	18	106.402	4	106.402	31	105.815	2	105.815	3	105.815	39	105.815	35
126.383	0	126.383	0	126.383	0	126.383	3	126.383	0	126.383	0	126.383	0	126.383	1	126.383	0	126.383	0	126.383	3	126.383	11	106.408	101	167.344	22	106.408	6	106.408	59	105.821	0	105.821	29	105.821	21	105.821	24
126.391	0	126.391	6	126.391	2	126.391	5	126.391	0	126.391	0	126.391	0	126.391	1	126.391	0	126.391	0	126.391	2	126.391	6	106.415	73	167.352	36	106.415	13	106.415	55	105.828	18	105.828	7	105.828	40	105.828	21
126.398	0	126.398	1	126.398	0	126.398	3	126.398	0	126.398	0	126.398	0	126.398	0	126.398	0	126.398	0	126.398	6	126.398	3	106.422	77	167.36	29	106.422	31	106.422	25	105.834	8	105.834	3	105.834	46	105.834	13
126.405	0	126.405	5	126.405	0	126.405	0	126.405	0	126.405	0	126.405	0	126.405	2	126.405	0	126.405	0	126.405	9	126.405	0	106.428	112	167.369	27	106.428	37	106.428	13	105.841	3	105.841	10	105.841	24	105.841	16
126.412	1	126.412	7	126.412	1	126.412	1	126.412	0	126.412	0	126.412	0	126.412	8	126.412	0	126.412	0	126.412	0	126.412	0	106.435	103	167.377	33	106.435	26	106.435	6	105.848	0	105.848	3	105.848	20	105.848	26
126.42	0	126.42	1	126.42	3	126.42	0	126.42	0	126.42	0	126.42	0	126.42	1	126.42	0	126.42	0	126.42	0	126.42	2	106.442	77	167.385	55	106.442	15	106.442	6	105.854	0	105.854	1	105.854	13	105.854	22
126.427	0	126.427	1	126.427	5	126.427	0	126.427	0	126.427	0	126.427	0	126.427	0	126.427	0	126.427	0	126.427	0	126.427	0	106.448	61	167.394	28	106.448	6	106.448	6	105.861	0	105.861	9	105.861	17	105.861	15
126.434	0	126.434	0	126.434	0	126.434	0	126.434	0	126.434	0	126.434	0	126.434	9	126.434	0	126.434	0	126.434	1	126.434	0	106.455	95	167.402	4	106.455	31	106.455	8	105.867	0	105.867	44	105.867	30	105.867	11
126.441	0	126.441	1	126.441	0	126.441	0	126.441	0	126.441	0	126.441	0	126.441	2	126.441	0	126.441	0	126.441	0	126.441	0	106.461	145	167.41	2	106.461	13	106.461	45	105.874	0	105.874	18	105.874	34	105.874	8
126.449	0	126.449	2	126.449	0	126.449	0	126.449	0	126.449	0	126.449	0	126.449	3	126.449	0	126.449	0	126.449	4	126.449	0	106.468	126	167.419	16	106.468	24	106.468	18	105.881	13	105.881	8	105.881	19	105.881	27
126.456	0	126.456	0	126.456	0	126.456	0	126.456	0	126.456	0	126.456	0	126.456	1	126.456	0	126.456	0	126.456	3	126.456	2	106.475	65	167.427	10	106.475	40	106.475	16	105.887	4	105.887	15	105.887	20	105.887	13
126.463	0	126.463	0	126.463	0	126.463	0	126.463	0	126.463	0	126.463	0	126.463	8	126.463	0	126.463	0	126.463	0	126.463	0	106.481	78	167.435	0	106.481	28	106.481	10	105.894	2	105.894	8	105.894	16	105.894	14
126.47	0	126.47	0	126.47	9	126.47	0	126.47	0	126.47	0	126.47	0	126.47	1	126.47	0	126.47	0	126.47	3	126.47	3	106.488	109	167.443	0	106.488	17	106.488	1	105.9	11	105.9	2	105.9	7	105.9	20
126.477	0	126.477	0	126.477	5	126.477	5	126.477	0	126.477	0	126.477	0	126.477	0	126.477	0	126.477	0	126.477	5	126.477	13	106.495	153	167.452	0	106.495	18	106.495	0	105.907	9	105.907	26	105.907	6	105.907	13
126.485	0	126.485	4	126.485	0	126.485	0	126.485	0	126.485	0	126.485	0	126.485	0	126.485	0	126.485	0	126.485	0	126.485	0	106.501	141	167.46	0	106.501	16	106.501	2	105.914	0	105.914	35	105.914	23	105.914	15
126.492	0	126.492	1	126.492	0	126.492	2	126.492	0	126.492	0	126.492	0	126.492	0	126.492	0	126.492	0	126.492	0	126.492	0	106.508	106	167.468	1	106.508	9	106.508	12	105.92	1	105.92	33	105.92	38	105.92	15
126.499	0	126.499	1	126.499	0	126.499	0	126.499	0	126.499	0	126.499	0	126.499	0	126.499	0	126.499	0	126.499	0	126.499	0	106.515	61	167.477	0	106.515	4	106.515	5	105.927	0	105.927	11	105.927	34	105.927	6
126.506	1	126.506	6	126.506	0	126.506	0	126.506	0	126.506	0	126.506	0	126.506	2	126.506	0	126.506	0	126.506	0	126.506	0	106.521	58	167.485	0	106.521	2	106.521	2	105.933	5	105.933	10	105.933	26	105.933	5
126.514	0	126.514	0	126.514	1	126.514	0	126.514	0	126.514	0	126.514	0	126.514	1	126.514	0	126.514	0	126.514	0	126.514	1	106.528	47	167.493	0	106.528	26	106.528	0	105.94	16	105.94	6	105.94	26	105.94	10
126.521	0	126.521	0	126.521	0	126.521	2	126.521	0	126.521	0	126.521	0	126.521	0	126.521	0	126.521	0	126.521	0	126.521	2	106.535	44	167.502	0	106.535	53	106.535	0	105.947	4	105.947	5	105.947	14	105.947	15
126.528	0	126.528	0	126.528	2	126.528	1	126.528	0	126.528	0	126.528	0	126.528	6	126.528	0	126.528	0	126.528	1	126.528	1	106.541	68	167.51	0	106.541	42	106.541	20	105.953	0	105.953	15	105.953	12	105.953	3
126.535	0	126.535	3	126.535	3	126.535	0	126.535	0	126.535	0	126.535	0	126.535	1	126.535	0	126.535	0	126.535	2	126.535	0	106.548	116	167.518	1	106.548	40	106.548	97	105.96	0	105.96	10	105.96	15	105.96	2
126.543	0	126.543	0	126.543	0	126.543	0	126.543	0	126.543	0	126.543	0	126.543	0	126.543	0	126.543	0	126.543	0	126.543	0	106.555	145	167.527	0	106.555	108	106.555	64	105.966	0	105.966	5	105.966	9	105.966	3
126.55	0	126.55	3	126.55	0	126.55	0	126.55	0	126.55	0	126.55	0	126.55	4	126.55	0	126.55	0	126.55	3	126.55	0	106.561	127	167.535	1	106.561	171	106.561	52	105.973	0	105.973	14	105.973	33	105.973	13
126.557	0	126.557	0	126.557	0	126.557	5	126.557	0	126.557	0	126.557	0	126.557	4	126.557	0	126.557	0	126.557	7	126.557	2	106.568	125	167.543	19	106.568	394	106.568	127	105.98	0	105.98	9	105.98	30	105.98	16
126.564	0	126.564	3	126.564	2	126.564	13	126.564	0	126.564	0	126.564	0	126.564	4	126.564	0	126.564	0	126.564	5	126.564	1	106.575	92	167.551	8	106.575	784	106.575	218	105.986	0	105.986	5	105.986	28	105.986	6
126.572	0	126.572	1	126.572	2	126.572	1	126.572	0	126.572	0	126.572	0	126.572	4	126.572	0	126.572	0	126.572	0	126.572	4	106.581	98	167.56	0	106.581	1498	106.581	285	105.993	0	105.993	9	105.993	22	105.993	9
126.579	0	126.579	0	126.579	1	126.579	1	126.579	0	126.579	0	126.579	0	126.579	8	126.579	0	126.579	0	126.579	1	126.579	0	106.588	91	167.568	1	106.588	2307	106.588	351	106	0	106	16	106	11	106	35
126.586	0	126.586	0	126.586	6	126.586	0	126.586	0	126.586	0	126.586	0	126.586	0	126.586	0	126.586	0	126.586	1	126.586	0	106.595	70	167.576	3	106.595	2872	106.595	377	106.006	35	106.006	31	106.006	8	106.006	42
126.593	0	126.593	0	126.593	0	126.593	4	126.593	0	126.593	0	126.593	0	126.593	0	126.593	0	126.593	0	126.593	3	126.593	0	106.601	68	167.585	0	106.601	3056	106.601	432	106.013	26	106.013	13	106.013	17	106.013	34
126.601	0	126.601	2	126.601	0	126.601	5	126.601	0	126.601	0	126.601	0	126.601	0	126.601	0	126.601	0	126.601	0	126.601	0	106.608	98	167.593	0	106.608	3332	106.608	308	106.019	10	106.019	17	106.019	31	106.019	21
126.608	0	126.608	0	126.608	0	126.608	1	126.608	0	126.608	0	126.608	0	126.608	1	126.608	0	126.608	0	126.608	4	126.608	0	106.615	99	167.601	0	106.615	3303	106.615	442	106.026	35	106.026	30	106.026	23	106.026	5
126.615	1	126.615	0	126.615	0	126.615	2	126.615	0	126.615	0	126.615	0	126.615	1	126.615	0	126.615	0	126.615	1	126.615	1	106.621	83	167.61	0	106.621	2830	106.621	357	106.033	27	106.033	13	106.033	21	106.033	11
126.622	0	126.622	1	126.622	1	126.622	3	126.622	0	126.622	0	126.622	0	126.622	0	126.622	0	126.622	0	126.622	7	126.622	0	106.628	96	167.618	10	106.628	2450	106.628	335	106.039	9	106.039	21	106.039	16	106.039	20
126.63	0	126.63	6	126.63	0	126.63	0	126.63	0	126.63	0	126.63	0	126.63	0	126.63	0	126.63	0	126.63	5	126.63	1	106.635	80	167.626	15	106.635	2083	106.635	200	106.046	4	106.046	28	106.046	31	106.046	10
126.637	0	126.637	2	126.637	0	126.637	0	126.637	0	126.637	0	126.637	0	126.637	15	126.637	0	126.637	0	126.637	1	126.637	0	106.641	74	167.635	6	106.641	1852	106.641	130	106.052	0	106.052	49	106.052	33	106.052	14
126.644	0	126.644	1	126.644	6	126.644	0	126.644	0	126.644	0	126.644	0	126.644	8	126.644	0	126.644	0	126.644	0	126.644	1	106.648	55	167.643	0	106.648	1535	106.648	146	106.059	0	106.059	39	106.059	26	106.059	13
126.651	0	126.651	0	126.651	3	126.651	0	126.651	0	126.651	0	126.651	0	126.651	2	126.651	0	126.651	0	126.651	0	126.651	2	106.655	71	167.651	3	106.655	1191	106.655	125	106.066	11	106.066	17	106.066	13	106.066	18
126.658	0	126.658	2	126.658	3	126.658	0	126.658	0	126.658	0	126.658	0	126.658	0	126.658	0	126.658	0	126.658	0	126.658	4	106.661	43	167.659	0	106.661	1065	106.661	140	106.072	25	106.072	5	106.072	10	106.072	6
126.666	0	126.666	0	126.666	1	126.666	3	126.666	0	126.666	0	126.666	0	126.666	0	126.666	0	126.666	0	126.666	2	126.666	0	106.668	63	167.668	0	106.668	850	106.668	154	106.079	9	106.079	2	106.079	5	106.079	28
126.673	0	126.673	0	126.673	0	126.673	0	126.673	0	126.673	0	126.673	0	126.673	1	126.673	0	126.673	0	126.673	1	126.673	4	106.675	54	167.676	6	106.675	789	106.675	228	106.085	4	106.085	36	106.085	5	106.085	28
126.68	0	126.68	6	126.68	0	126.68	1	126.68	0	126.68	0	126.68	0	126.68	1	126.68	0	126.68	0	126.68	2	126.68	0	106.681	76	167.684	1	106.681	621	106.681	331	106.092	0	106.092	51	106.092	13	106.092	16
126.687	0	126.687	0	126.687	0	126.687	0	126.687	0	126.687	0	126.687	0	126.687	0	126.687	0	126.687	0	126.687	0	126.687	0	106.688	56	167.693	0	106.688	620	106.688	333	106.099	0	106.099	35	106.099	14	106.099	8
126.695	0	126.695	0	126.695	0	126.695	1	126.695	0	126.695	0	126.695	0	126.695	3	126.695	0	126.695	0	126.695	0	126.695	0	106.695	96	167.701	0	106.695	477	106.695	227	106.105	0	106.105	29	106.105	7	106.105	21
126.702	0	126.702	0	126.702	6	126.702	1	126.702	0	126.702	0	126.702	0	126.702	3	126.702	0	126.702	0	126.702	0	126.702	4	106.701	110	167.709	0	106.701	411	106.701	245	106.112	11	106.112	39	106.112	13	106.112	20
126.709	0	126.709	1	126.709	1	126.709	0	126.709	0	126.709	0	126.709	0	126.709	7	126.709	0	126.709	0	126.709	3	126.709	3	106.708	102	167.718	0	106.708	343	106.708	193	106.118	5	106.118	24	106.118	9	106.118	16
126.716	0	126.716	2	126.716	1	126.716	0	126.716	0	126.716	0	126.716	0	126.716	8	126.716	0	126.716	0	126.716	0	126.716	1	106.714	110	167.726	0	106.714	289	106.714	187	106.125	3	106.125	9	106.125	11	106.125	28
126.724	1	126.724	6	126.724	0	126.724	0	126.724	0	126.724	0	126.724	0	126.724	1	126.724	0	126.724	0	126.724	0	126.724	3	106.721	104	167.734	0	106.721	252	106.721	148	106.132	6	106.132	21	106.132	31	106.132	38
126.731	0	126.731	1	126.731	0	126.731	0	126.731	0	126.731	0	126.731	0	126.731	0	126.731	0	126.731	0	126.731	3	126.731	6	106.728	89	167.743	0	106.728	256	106.728	118	106.138	39	106.138	18	106.138	14	106.138	41
126.738	0	126.738	0	126.738	0	126.738	2	126.738	0	126.738	0	126.738	0	126.738	1	126.738	0	126.738	0	126.738	2	126.738	2	106.734	84	167.751	0	106.734	216	106.734	131	106.145	61	106.145	51	106.145	5	106.145	78
126.745	0	126.745	0	126.745	0	126.745	0	126.745	0	126.745	0	126.745	0	126.745	2	126.745	0	126.745	0	126.745	1	126.745	3	106.741	74	167.759	0	106.741	238	106.741	59	106.151	64	106.151	52	106.151	40	106.151	129
126.753	0	126.753	10	126.753	1	126.753	0	126.753	0	126.753	0	126.753	5	126.753	3	126.753	0	126.753	0	126.753	1	126.753	6	106.748	36	167.767	0	106.748	273	106.748	30	106.158	77	106.158	37	106.158	28	106.158	155
126.76	2	126.76	3	126.76	9	126.76	0	126.76	0	126.76	0	126.76	0	126.76	3	126.76	0	126.76	0	126.76	1	126.76	0	106.754	80	167.776	0	106.754	204	106.754	44	106.165	76	106.165	47	106.165	11	106.165	221
126.767	0	126.767	0	126.767	3	126.767	11	126.767	0	126.767	0	126.767	0	126.767	5	126.767	0	126.767	0	126.767	9	126.767	5	106.761	102	167.784	0	106.761	148	106.761	56	106.171	71	106.171	36	106.171	17	106.171	376
126.774	0	126.774	0	126.774	5	126.774	8	126.774	0	126.774	0	126.774	0	126.774	0	126.774	0	126.774	0	126.774	7	126.774	8	106.768	119	167.792	0	106.768	116	106.768	20	106.178	71	106.178	52	106.178	30	106.178	533
126.782	0	126.782	0	126.782	4	126.782	3	126.782	0	126.782	0	126.782	0	126.782	0	126.782	0	126.782	0	126.782	7	126.782	2	106.774	96	167.801	0	106.774	169	106.774	13	106.184	118	106.184	45	106.184	14	106.184	759
126.789	0	126.789	0	126.789	5	126.789	7	126.789	0	126.789	0	126.789	0	126.789	12	126.789	0	126.789	0	126.789	16	126.789	8	106.781	58	167.809	0	106.781	218	106.781	38	106.191	166	106.191	32	106.191	37	106.191	798
126.796	0	126.796	0	126.796	6	126.796	3	126.796	0	126.796	0	126.796	0	126.796	15	126.796	0	126.796	0	126.796	12	126.796	1	106.788	61	167.817	0	106.788	202	106.788	36	106.198	169	106.198	65	106.198	68	106.198	725
126.803	0	126.803	2	126.803	6	126.803	3	126.803	0	126.803	0	126.803	0	126.803	3	126.803	0	126.803	0	126.803	18	126.803	3	106.794	45	167.826	0	106.794	171	106.794	45	106.204	149	106.204	51	106.204	74	106.204	779
126.811	0	126.811	4	126.811	5	126.811	11	126.811	0	126.811	0	126.811	0	126.811	3	126.811	0	126.811	0	126.811	41	126.811	3	106.801	73	167.834	0	106.801	137	106.801	38	106.211	88	106.211	66	106.211	55	106.211	798
126.818	0	126.818	0	126.818	16	126.818	6	126.818	0	126.818	0	126.818	0	126.818	7	126.818	0	126.818	0	126.818	41	126.818	6	106.808	65	167.842	0	106.808	90	106.808	15	106.218	77	106.218	40	106.218	54	106.218	897
126.825	0	126.825	0	126.825	13	126.825	4	126.825	0	126.825	0	126.825	0	126.825	22	126.825	0	126.825	0	126.825	26	126.825	5	106.814	84	167.851	0	106.814	122	106.814	32	106.224	82	106.224	79	106.224	33	106.224	856
126.832	0	126.832	0	126.832	28	126.832	6	126.832	3	126.832	0	126.832	0	126.832	15	126.832	0	126.832	0	126.832	26	126.832	9	106.821	98	167.859	0	106.821	100	106.821	31	106.231	115	106.231	83	106.231	30	106.231	857
126.84	2	126.84	1	126.84	20	126.84	11	126.84	0	126.84	0	126.84	0	126.84	34	126.84	0	126.84	0	126.84	22	126.84	22	106.828	86	167.867	0	106.828	66	106.828	23	106.237	112	106.237	74	106.237	20	106.237	742
126.847	1	126.847	7	126.847	32	126.847	13	126.847	0	126.847	0	126.847	0	126.847	54	126.847	0	126.847	0	126.847	37	126.847	23	106.834	107	167.876	0	106.834	101	106.834	36	106.244	61	106.244	51	106.244	9	106.244	635
126.854	0	126.854	1	126.854	40	126.854	8	126.854	0	126.854	0	126.854	3	126.854	125	126.854	0	126.854	1	126.854	105	126.854	28	106.841	113	167.884	0	106.841	134	106.841	33	106.251	63	106.251	34	106.251	5	106.251	645
126.861	0	126.861	16	126.861	91	126.861	27	126.861	3	126.861	0	126.861	0	126.861	173	126.861	0	126.861	0	126.861	196	126.861	35	106.848	75	167.892	0	106.848	110	106.848	25	106.257	51	106.257	32	106.257	3	106.257	627
126.869	0	126.869	24	126.869	97	126.869	26	126.869	0	126.869	0	126.869	0	126.869	236	126.869	0	126.869	0	126.869	307	126.869	69	106.854	72	167.9	1	106.854	102	106.854	12	106.264	18	106.264	31	106.264	19	106.264	479
126.876	0	126.876	23	126.876	84	126.876	73	126.876	0	126.876	0	126.876	1	126.876	311	126.876	0	126.876	5	126.876	315	126.876	66	106.861	31	167.909	0	106.861	111	106.861	7	106.27	24	106.27	43	106.27	15	106.27	358
126.883	1	126.883	44	126.883	147	126.883	108	126.883	0	126.883	0	126.883	2	126.883	360	126.883	0	126.883	3	126.883	364	126.883	94	106.868	49	167.917	0	106.868	120	106.868	5	106.277	20	106.277	20	106.277	8	106.277	325
126.89	8	126.89	64	126.89	237	126.89	197	126.89	0	126.89	0	126.89	0	126.89	450	126.89	1	126.89	0	126.89	426	126.89	114	106.874	118	167.925	3	106.874	98	106.874	3	106.284	4	106.284	6	106.284	16	106.284	287
126.898	9	126.898	84	126.898	305	126.898	301	126.898	0	126.898	0	126.898	4	126.898	502	126.898	0	126.898	0	126.898	366	126.898	136	106.881	164	167.934	1	106.881	109	106.881	21	106.29	0	106.29	1	106.29	16	106.29	232
126.905	12	126.905	94	126.905	452	126.905	328	126.905	0	126.905	0	126.905	3	126.905	605	126.905	0	126.905	0	126.905	361	126.905	157	106.888	90	167.942	0	106.888	79	106.888	10	106.297	0	106.297	3	106.297	16	106.297	294
126.912	11	126.912	106	126.912	573	126.912	411	126.912	3	126.912	0	126.912	2	126.912	611	126.912	0	126.912	0	126.912	345	126.912	118	106.894	110	167.95	0	106.894	102	106.894	9	106.303	0	106.303	7	106.303	26	106.303	298
126.919	8	126.919	81	126.919	680	126.919	479	126.919	1	126.919	0	126.919	0	126.919	535	126.919	0	126.919	2	126.919	249	126.919	98	106.901	106	167.959	0	106.901	115	106.901	1	106.31	22	106.31	4	106.31	37	106.31	275
126.927	4	126.927	73	126.927	635	126.927	552	126.927	0	126.927	0	126.927	0	126.927	490	126.927	0	126.927	0	126.927	185	126.927	92	106.908	79	167.967	1	106.908	83	106.908	8	106.317	19	106.317	0	106.317	71	106.317	203
126.934	5	126.934	53	126.934	628	126.934	565	126.934	0	126.934	0	126.934	0	126.934	417	126.934	0	126.934	0	126.934	145	126.934	64	106.914	125	167.975	5	106.914	69	106.914	19	106.323	2	106.323	22	106.323	66	106.323	162
126.941	3	126.941	50	126.941	523	126.941	505	126.941	3	126.941	0	126.941	0	126.941	299	126.941	0	126.941	2	126.941	78	126.941	76	106.921	98	167.984	1	106.921	93	106.921	5	106.33	1	106.33	52	106.33	69	106.33	173
126.948	0	126.948	43	126.948	428	126.948	375	126.948	5	126.948	0	126.948	5	126.948	281	126.948	0	126.948	0	126.948	84	126.948	25	106.928	77	167.992	0	106.928	39	106.928	2	106.337	0	106.337	38	106.337	38	106.337	184
126.956	2	126.956	33	126.956	395	126.956	297	126.956	1	126.956	0	126.956	4	126.956	204	126.956	2	126.956	6	126.956	56	126.956	16	106.934	88	168	0	106.934	50	106.934	33	106.343	0	106.343	13	106.343	31	106.343	185
126.963	0	126.963	40	126.963	316	126.963	207	126.963	0	126.963	0	126.963	0	126.963	155	126.963	0	126.963	4	126.963	30	126.963	18	106.941	107	168.009	0	106.941	73	106.941	61	106.35	0	106.35	3	106.35	40	106.35	189
126.97	0	126.97	39	126.97	249	126.97	128	126.97	0	126.97	0	126.97	0	126.97	127	126.97	3	126.97	0	126.97	17	126.97	19	106.948	69	168.017	3	106.948	77	106.948	61	106.356	0	106.356	28	106.356	51	106.356	171
126.977	3	126.977	55	126.977	186	126.977	88	126.977	0	126.977	0	126.977	0	126.977	115	126.977	7	126.977	1	126.977	4	126.977	29	106.954	66	168.025	0	106.954	40	106.954	24	106.363	0	106.363	18	106.363	22	106.363	116
126.985	7	126.985	33	126.985	141	126.985	98	126.985	0	126.985	0	126.985	1	126.985	95	126.985	1	126.985	0	126.985	12	126.985	17	106.961	50	168.034	0	106.961	42	106.961	31	106.37	18	106.37	28	106.37	16	106.37	104
126.992	6	126.992	2	126.992	94	126.992	78	126.992	0	126.992	0	126.992	0	126.992	74	126.992	0	126.992	0	126.992	14	126.992	15	106.968	70	168.042	0	106.968	36	106.968	60	106.376	5	106.376	18	106.376	35	106.376	82
126.999	5	126.999	3	126.999	78	126.999	76	126.999	0	126.999	0	126.999	0	126.999	60	126.999	0	126.999	0	126.999	3	126.999	9	106.974	37	168.05	0	106.974	15	106.974	50	106.383	0	106.383	24	106.383	37	106.383	83
127.006	2	127.006	8	127.006	81	127.006	86	127.006	0	127.006	0	127.006	0	127.006	52	127.006	0	127.006	0	127.006	16	127.006	3	106.981	40	168.059	0	106.981	41	106.981	72	106.389	0	106.389	13	106.389	46	106.389	67
127.014	5	127.014	2	127.014	64	127.014	60	127.014	0	127.014	0	127.014	2	127.014	34	127.014	0	127.014	0	127.014	5	127.014	11	106.988	69	168.067	6	106.988	67	106.988	75	106.396	0	106.396	15	106.396	45	106.396	52
127.021	5	127.021	9	127.021	32	127.021	23	127.021	0	127.021	0	127.021	0	127.021	22	127.021	0	127.021	0	127.021	3	127.021	6	106.994	75	168.075	2	106.994	42	106.994	49	106.403	0	106.403	9	106.403	31	106.403	59
127.028	8	127.028	4	127.028	18	127.028	22	127.028	0	127.028	0	127.028	7	127.028	27	127.028	0	127.028	0	127.028	6	127.028	2	107.001	61	168.083	0	107.001	27	107.001	31	106.409	0	106.409	34	106.409	25	106.409	56
127.035	3	127.035	9	127.035	10	127.035	12	127.035	4	127.035	0	127.035	6	127.035	23	127.035	0	127.035	0	127.035	3	127.035	0	107.008	132	168.092	0	107.008	14	107.008	28	106.416	0	106.416	21	106.416	69	106.416	41
127.043	15	127.043	5	127.043	8	127.043	10	127.043	5	127.043	0	127.043	0	127.043	10	127.043	0	127.043	1	127.043	1	127.043	2	107.014	116	168.1	0	107.014	31	107.014	26	106.423	7	106.423	12	106.423	61	106.423	44
127.05	11	127.05	6	127.05	2	127.05	6	127.05	0	127.05	0	127.05	0	127.05	5	127.05	0	127.05	0	127.05	6	127.05	5	107.021	78	168.108	4	107.021	10	107.021	23	106.429	24	106.429	18	106.429	31	106.429	14
127.057	6	127.057	2	127.057	0	127.057	2	127.057	0	127.057	0	127.057	0	127.057	2	127.057	0	127.057	0	127.057	8	127.057	8	107.028	67	168.117	0	107.028	9	107.028	47	106.436	22	106.436	5	106.436	44	106.436	22
127.064	2	127.064	2	127.064	3	127.064	4	127.064	0	127.064	0	127.064	0	127.064	7	127.064	0	127.064	0	127.064	14	127.064	6	107.035	50	168.125	0	107.035	26	107.035	17	106.442	14	106.442	10	106.442	53	106.442	20
127.072	7	127.072	0	127.072	0	127.072	4	127.072	1	127.072	0	127.072	0	127.072	14	127.072	0	127.072	0	127.072	3	127.072	2	107.041	35	168.133	4	107.041	21	107.041	16	106.449	4	106.449	8	106.449	45	106.449	12
127.079	6	127.079	0	127.079	11	127.079	6	127.079	0	127.079	0	127.079	0	127.079	0	127.079	0	127.079	0	127.079	4	127.079	0	107.048	91	168.142	7	107.048	25	107.048	22	106.456	0	106.456	3	106.456	53	106.456	9
127.086	0	127.086	1	127.086	1	127.086	1	127.086	0	127.086	0	127.086	0	127.086	3	127.086	0	127.086	0	127.086	3	127.086	0	107.055	152	168.15	0	107.055	21	107.055	27	106.462	0	106.462	20	106.462	38	106.462	14
127.093	0	127.093	3	127.093	0	127.093	1	127.093	0	127.093	0	127.093	0	127.093	0	127.093	0	127.093	0	127.093	1	127.093	5	107.061	144	168.158	4	107.061	20	107.061	27	106.469	0	106.469	11	106.469	40	106.469	13
127.101	0	127.101	1	127.101	2	127.101	5	127.101	0	127.101	0	127.101	0	127.101	16	127.101	0	127.101	0	127.101	7	127.101	2	107.068	130	168.167	0	107.068	7	107.068	24	106.475	11	106.475	1	106.475	86	106.475	2
127.108	3	127.108	0	127.108	3	127.108	2	127.108	0	127.108	0	127.108	0	127.108	7	127.108	0	127.108	0	127.108	2	127.108	1	107.075	78	168.175	0	107.075	52	107.075	15	106.482	21	106.482	10	106.482	64	106.482	14
127.115	0	127.115	0	127.115	0	127.115	8	127.115	0	127.115	0	127.115	0	127.115	9	127.115	0	127.115	0	127.115	3	127.115	4	107.081	85	168.183	35	107.081	31	107.081	66	106.489	5	106.489	15	106.489	39	106.489	6
127.123	0	127.123	1	127.123	0	127.123	2	127.123	0	127.123	0	127.123	0	127.123	1	127.123	0	127.123	0	127.123	1	127.123	2	107.088	57	168.192	55	107.088	29	107.088	55	106.495	9	106.495	24	106.495	45	106.495	0
127.13	0	127.13	3	127.13	5	127.13	3	127.13	0	127.13	0	127.13	0	127.13	3	127.13	0	127.13	0	127.13	3	127.13	0	107.095	69	168.2	17	107.095	27	107.095	25	106.502	0	106.502	26	106.502	54	106.502	0
127.137	0	127.137	7	127.137	5	127.137	4	127.137	0	127.137	0	127.137	0	127.137	3	127.137	0	127.137	0	127.137	3	127.137	7	107.101	54	168.208	30	107.101	13	107.101	17	106.509	2	106.509	13	106.509	70	106.509	0
127.144	0	127.144	1	127.144	0	127.144	1	127.144	0	127.144	0	127.144	0	127.144	8	127.144	0	127.144	0	127.144	5	127.144	1	107.108	33	168.217	41	107.108	4	107.108	15	106.515	12	106.515	4	106.515	41	106.515	1
127.152	1	127.152	2	127.152	0	127.152	1	127.152	0	127.152	0	127.152	0	127.152	0	127.152	0	127.152	0	127.152	5	127.152	0	107.115	48	168.225	13	107.115	23	107.115	23	106.522	1	106.522	13	106.522	46	106.522	0
127.159	1	127.159	0	127.159	3	127.159	0	127.159	0	127.159	0	127.159	0	127.159	0	127.159	0	127.159	0	127.159	0	127.159	1	107.121	116	168.233	9	107.121	10	107.121	40	106.528	0	106.528	3	106.528	57	106.528	0
127.166	0	127.166	0	127.166	2	127.166	0	127.166	0	127.166	0	127.166	0	127.166	0	127.166	0	127.166	0	127.166	4	127.166	0	107.128	106	168.242	20	107.128	13	107.128	32	106.535	0	106.535	24	106.535	44	106.535	15
127.173	0	127.173	1	127.173	1	127.173	1	127.173	0	127.173	0	127.173	3	127.173	2	127.173	0	127.173	0	127.173	1	127.173	3	107.135	81	168.25	19	107.135	12	107.135	30	106.542	0	106.542	9	106.542	42	106.542	6
127.181	0	127.181	0	127.181	5	127.181	2	127.181	0	127.181	0	127.181	7	127.181	4	127.181	0	127.181	2	127.181	0	127.181	0	107.141	67	168.258	17	107.141	39	107.141	14	106.548	0	106.548	0	106.548	31	106.548	1
127.188	0	127.188	1	127.188	1	127.188	2	127.188	0	127.188	0	127.188	0	127.188	1	127.188	0	127.188	0	127.188	0	127.188	0	107.148	73	168.267	19	107.148	33	107.148	8	106.555	7	106.555	0	106.555	16	106.555	34
127.195	0	127.195	0	127.195	3	127.195	1	127.195	0	127.195	0	127.195	0	127.195	5	127.195	0	127.195	0	127.195	0	127.195	0	107.155	75	168.275	17	107.155	41	107.155	3	106.562	0	106.562	0	106.562	13	106.562	55
127.202	0	127.202	0	127.202	11	127.202	9	127.202	0	127.202	0	127.202	0	127.202	4	127.202	0	127.202	0	127.202	4	127.202	8	107.161	96	168.283	36	107.161	28	107.161	14	106.568	0	106.568	3	106.568	7	106.568	35
127.21	0	127.21	0	127.21	7	127.21	1	127.21	0	127.21	0	127.21	0	127.21	2	127.21	0	127.21	0	127.21	2	127.21	3	107.168	69	168.292	37	107.168	49	107.168	21	106.575	0	106.575	9	106.575	6	106.575	17
127.217	0	127.217	0	127.217	3	127.217	4	127.217	0	127.217	0	127.217	0	127.217	0	127.217	0	127.217	0	127.217	2	127.217	1	107.175	28	168.3	24	107.175	39	107.175	16	106.581	0	106.581	10	106.581	6	106.581	7
127.224	0	127.224	2	127.224	4	127.224	0	127.224	0	127.224	0	127.224	0	127.224	0	127.224	0	127.224	0	127.224	0	127.224	8	107.181	63	168.308	11	107.181	11	107.181	10	106.588	0	106.588	10	106.588	38	106.588	10
127.231	0	127.231	0	127.231	0	127.231	2	127.231	0	127.231	0	127.231	0	127.231	2	127.231	0	127.231	0	127.231	1	127.231	3	107.188	96	168.316	14	107.188	21	107.188	13	106.595	0	106.595	7	106.595	46	106.595	11
127.239	0	127.239	0	127.239	1	127.239	1	127.239	0	127.239	0	127.239	0	127.239	2	127.239	0	127.239	0	127.239	3	127.239	0	107.195	63	168.325	10	107.195	13	107.195	12	106.601	0	106.601	14	106.601	36	106.601	5
127.246	0	127.246	0	127.246	0	127.246	0	127.246	0	127.246	0	127.246	0	127.246	3	127.246	0	127.246	0	127.246	0	127.246	3	107.201	41	168.333	23	107.201	8	107.201	15	106.608	0	106.608	23	106.608	61	106.608	33
127.253	0	127.253	12	127.253	0	127.253	0	127.253	0	127.253	0	127.253	0	127.253	1	127.253	0	127.253	0	127.253	0	127.253	1	107.208	40	168.341	37	107.208	17	107.208	6	106.615	0	106.615	58	106.615	55	106.615	22
127.26	0	127.26	5	127.26	0	127.26	1	127.26	0	127.26	0	127.26	0	127.26	0	127.26	0	127.26	0	127.26	2	127.26	0	107.215	50	168.35	40	107.215	19	107.215	9	106.621	0	106.621	35	106.621	48	106.621	10
127.268	0	127.268	0	127.268	0	127.268	0	127.268	0	127.268	0	127.268	0	127.268	2	127.268	0	127.268	0	127.268	1	127.268	4	107.221	62	168.358	11	107.221	9	107.221	13	106.628	0	106.628	16	106.628	41	106.628	3
127.275	0	127.275	1	127.275	0	127.275	0	127.275	0	127.275	0	127.275	0	127.275	1	127.275	0	127.275	0	127.275	3	127.275	2	107.228	44	168.366	11	107.228	23	107.228	12	106.634	0	106.634	28	106.634	70	106.634	8
127.282	0	127.282	1	127.282	1	127.282	2	127.282	0	127.282	0	127.282	0	127.282	3	127.282	0	127.282	0	127.282	4	127.282	4	107.235	57	168.375	3	107.235	26	107.235	8	106.641	0	106.641	31	106.641	69	106.641	21
127.289	0	127.289	2	127.289	5	127.289	0	127.289	0	127.289	0	127.289	0	127.289	0	127.289	0	127.289	0	127.289	0	127.289	4	107.241	61	168.383	8	107.241	14	107.241	0	106.648	0	106.648	18	106.648	54	106.648	7
127.297	0	127.297	1	127.297	1	127.297	0	127.297	0	127.297	0	127.297	0	127.297	0	127.297	0	127.297	0	127.297	0	127.297	7	107.248	51	168.391	2	107.248	22	107.248	12	106.654	0	106.654	25	106.654	30	106.654	16
127.304	0	127.304	0	127.304	0	127.304	0	127.304	0	127.304	0	127.304	0	127.304	3	127.304	0	127.304	0	127.304	2	127.304	4	107.255	51	168.4	4	107.255	34	107.255	39	106.661	0	106.661	32	106.661	17	106.661	4
127.311	0	127.311	0	127.311	0	127.311	0	127.311	0	127.311	0	127.311	0	127.311	1	127.311	0	127.311	0	127.311	5	127.311	7	107.261	84	168.408	6	107.261	66	107.261	40	106.668	0	106.668	16	106.668	15	106.668	3
127.319	0	127.319	0	127.319	0	127.319	0	127.319	0	127.319	0	127.319	0	127.319	0	127.319	0	127.319	0	127.319	0	127.319	3	107.268	91	168.416	13	107.268	93	107.268	35	106.674	0	106.674	7	106.674	16	106.674	2
127.326	0	127.326	1	127.326	0	127.326	1	127.326	0	127.326	0	127.326	0	127.326	1	127.326	0	127.326	0	127.326	0	127.326	1	107.275	64	168.425	6	107.275	56	107.275	29	106.681	2	106.681	31	106.681	24	106.681	19
127.333	1	127.333	0	127.333	1	127.333	1	127.333	0	127.333	0	127.333	0	127.333	1	127.333	0	127.333	0	127.333	8	127.333	0	107.282	67	168.433	8	107.282	115	107.282	14	106.687	0	106.687	16	106.687	17	106.687	8
127.34	0	127.34	0	127.34	2	127.34	0	127.34	0	127.34	0	127.34	0	127.34	2	127.34	0	127.34	0	127.34	7	127.34	0	107.288	58	168.441	2	107.288	73	107.288	18	106.694	0	106.694	8	106.694	52	106.694	2
127.348	0	127.348	0	127.348	0	127.348	0	127.348	0	127.348	0	127.348	0	127.348	1	127.348	0	127.348	0	127.348	12	127.348	1	107.295	63	168.45	4	107.295	34	107.295	30	106.701	0	106.701	5	106.701	44	106.701	5
127.355	0	127.355	0	127.355	1	127.355	2	127.355	0	127.355	0	127.355	0	127.355	1	127.355	0	127.355	0	127.355	8	127.355	2	107.302	89	168.458	26	107.302	27	107.302	91	106.707	0	106.707	36	106.707	55	106.707	7
127.362	0	127.362	1	127.362	0	127.362	0	127.362	0	127.362	0	127.362	0	127.362	1	127.362	0	127.362	0	127.362	4	127.362	0	107.308	60	168.466	19	107.308	8	107.308	45	106.714	11	106.714	26	106.714	40	106.714	8
127.369	0	127.369	0	127.369	1	127.369	0	127.369	0	127.369	0	127.369	0	127.369	1	127.369	0	127.369	0	127.369	1	127.369	0	107.315	48	168.475	4	107.315	5	107.315	37	106.721	8	106.721	6	106.721	38	106.721	11
127.377	0	127.377	0	127.377	0	127.377	0	127.377	0	127.377	0	127.377	0	127.377	0	127.377	0	127.377	0	127.377	0	127.377	9	107.322	67	168.483	1	107.322	1	107.322	36	106.727	2	106.727	11	106.727	25	106.727	13
127.384	0	127.384	0	127.384	0	127.384	0	127.384	0	127.384	0	127.384	0	127.384	2	127.384	0	127.384	0	127.384	0	127.384	11	107.328	66	168.491	6	107.328	0	107.328	11	106.734	0	106.734	13	106.734	15	106.734	14
127.391	0	127.391	0	127.391	0	127.391	0	127.391	0	127.391	0	127.391	0	127.391	0	127.391	0	127.391	0	127.391	3	127.391	2	107.335	67	168.5	21	107.335	5	107.335	16	106.74	0	106.74	27	106.74	28	106.74	29
127.398	0	127.398	4	127.398	0	127.398	0	127.398	0	127.398	0	127.398	0	127.398	0	127.398	0	127.398	0	127.398	9	127.398	0	107.342	45	168.508	16	107.342	12	107.342	33	106.747	11	106.747	33	106.747	48	106.747	20
127.406	0	127.406	0	127.406	0	127.406	1	127.406	0	127.406	0	127.406	0	127.406	0	127.406	0	127.406	0	127.406	8	127.406	1	107.348	53	168.516	7	107.348	17	107.348	22	106.754	36	106.754	49	106.754	29	106.754	12
127.413	0	127.413	5	127.413	0	127.413	0	127.413	0	127.413	0	127.413	0	127.413	0	127.413	0	127.413	0	127.413	4	127.413	1	107.355	62	168.525	1	107.355	13	107.355	3	106.76	16	106.76	15	106.76	16	106.76	14
127.42	0	127.42	3	127.42	2	127.42	0	127.42	0	127.42	0	127.42	0	127.42	0	127.42	0	127.42	0	127.42	3	127.42	0	107.362	92	168.533	0	107.362	1	107.362	5	106.767	5	106.767	10	106.767	12	106.767	18
127.428	1	127.428	0	127.428	0	127.428	1	127.428	0	127.428	0	127.428	0	127.428	3	127.428	0	127.428	0	127.428	0	127.428	0	107.368	121	168.541	0	107.368	2	107.368	12	106.774	11	106.774	8	106.774	9	106.774	13
127.435	0	127.435	0	127.435	2	127.435	5	127.435	0	127.435	0	127.435	0	127.435	2	127.435	0	127.435	0	127.435	2	127.435	0	107.375	79	168.55	0	107.375	11	107.375	4	106.78	11	106.78	1	106.78	6	106.78	27
127.442	0	127.442	0	127.442	0	127.442	2	127.442	0	127.442	0	127.442	0	127.442	2	127.442	0	127.442	0	127.442	2	127.442	0	107.382	83	168.558	0	107.382	4	107.382	24	106.787	1	106.787	6	106.787	4	106.787	4
127.449	0	127.449	0	127.449	3	127.449	0	127.449	0	127.449	0	127.449	0	127.449	0	127.449	0	127.449	0	127.449	2	127.449	3	107.388	53	168.566	0	107.388	39	107.388	26	106.793	12	106.793	24	106.793	3	106.793	1
127.457	0	127.457	0	127.457	3	127.457	0	127.457	0	127.457	0	127.457	0	127.457	2	127.457	0	127.457	0	127.457	6	127.457	3	107.395	73	168.575	0	107.395	73	107.395	33	106.8	4	106.8	14	106.8	6	106.8	16
127.464	0	127.464	1	127.464	0	127.464	0	127.464	0	127.464	0	127.464	0	127.464	2	127.464	0	127.464	0	127.464	6	127.464	2	107.402	124	168.583	0	107.402	28	107.402	11	106.807	0	106.807	5	106.807	15	106.807	21
127.471	0	127.471	0	127.471	0	127.471	0	127.471	0	127.471	0	127.471	0	127.471	4	127.471	0	127.471	0	127.471	5	127.471	0	107.408	76	168.591	0	107.408	18	107.408	3	106.813	4	106.813	24	106.813	12	106.813	13
127.478	0	127.478	0	127.478	0	127.478	1	127.478	0	127.478	0	127.478	0	127.478	0	127.478	0	127.478	0	127.478	1	127.478	5	107.415	67	168.6	0	107.415	44	107.415	11	106.82	15	106.82	21	106.82	18	106.82	10
127.486	0	127.486	0	127.486	0	127.486	0	127.486	0	127.486	0	127.486	0	127.486	0	127.486	0	127.486	0	127.486	2	127.486	5	107.422	105	168.608	0	107.422	33	107.422	11	106.827	5	106.827	13	106.827	37	106.827	6
127.493	0	127.493	1	127.493	0	127.493	0	127.493	0	127.493	0	127.493	0	127.493	0	127.493	0	127.493	0	127.493	4	127.493	0	107.429	133	168.616	0	107.429	11	107.429	0	106.833	1	106.833	19	106.833	48	106.833	4
127.5	0	127.5	1	127.5	0	127.5	0	127.5	0	127.5	0	127.5	0	127.5	6	127.5	0	127.5	0	127.5	1	127.5	4	107.435	111	168.625	0	107.435	10	107.435	23	106.84	9	106.84	10	106.84	34	106.84	0
127.507	0	127.507	0	127.507	0	127.507	0	127.507	0	127.507	0	127.507	0	127.507	1	127.507	0	127.507	0	127.507	0	127.507	0	107.442	104	168.633	0	107.442	38	107.442	71	106.846	5	106.846	6	106.846	27	106.846	0
127.515	0	127.515	0	127.515	0	127.515	0	127.515	0	127.515	0	127.515	0	127.515	4	127.515	0	127.515	0	127.515	0	127.515	3	107.449	97	168.641	0	107.449	55	107.449	70	106.853	0	106.853	1	106.853	18	106.853	0
127.522	0	127.522	1	127.522	8	127.522	0	127.522	0	127.522	0	127.522	0	127.522	4	127.522	0	127.522	0	127.522	2	127.522	0	107.455	81	168.65	0	107.455	59	107.455	31	106.86	7	106.86	10	106.86	17	106.86	0
127.529	0	127.529	0	127.529	3	127.529	1	127.529	0	127.529	0	127.529	0	127.529	2	127.529	0	127.529	0	127.529	1	127.529	3	107.462	41	168.658	13	107.462	31	107.462	17	106.866	1	106.866	20	106.866	19	106.866	0
127.537	0	127.537	3	127.537	0	127.537	1	127.537	0	127.537	0	127.537	0	127.537	6	127.537	0	127.537	0	127.537	4	127.537	0	107.469	45	168.666	31	107.469	10	107.469	25	106.873	12	106.873	19	106.873	60	106.873	1
127.544	0	127.544	2	127.544	1	127.544	0	127.544	0	127.544	0	127.544	0	127.544	1	127.544	0	127.544	0	127.544	0	127.544	0	107.475	46	168.675	11	107.475	9	107.475	30	106.88	18	106.88	10	106.88	58	106.88	28
127.551	0	127.551	0	127.551	1	127.551	0	127.551	0	127.551	0	127.551	0	127.551	1	127.551	0	127.551	0	127.551	1	127.551	0	107.482	49	168.683	4	107.482	4	107.482	38	106.886	5	106.886	0	106.886	27	106.886	18
127.558	0	127.558	2	127.558	0	127.558	9	127.558	0	127.558	0	127.558	0	127.558	0	127.558	0	127.558	0	127.558	0	127.558	5	107.489	47	168.691	2	107.489	7	107.489	15	106.893	0	106.893	8	106.893	17	106.893	6
127.566	0	127.566	0	127.566	0	127.566	1	127.566	0	127.566	0	127.566	0	127.566	2	127.566	0	127.566	0	127.566	3	127.566	0	107.495	53	168.7	1	107.495	24	107.495	13	106.9	0	106.9	7	106.9	12	106.9	7
127.573	0	127.573	2	127.573	14	127.573	1	127.573	0	127.573	0	127.573	0	127.573	3	127.573	0	127.573	0	127.573	0	127.573	8	107.502	70	168.708	3	107.502	32	107.502	4	106.906	0	106.906	19	106.906	29	106.906	0
127.58	0	127.58	0	127.58	3	127.58	2	127.58	0	127.58	0	127.58	0	127.58	0	127.58	0	127.58	0	127.58	3	127.58	3	107.509	74	168.716	0	107.509	20	107.509	6	106.913	1	106.913	19	106.913	30	106.913	0
127.587	0	127.587	0	127.587	0	127.587	1	127.587	0	127.587	0	127.587	0	127.587	0	127.587	0	127.587	0	127.587	3	127.587	6	107.515	57	168.725	0	107.515	15	107.515	8	106.919	0	106.919	15	106.919	15	106.919	0
127.595	0	127.595	0	127.595	5	127.595	0	127.595	0	127.595	0	127.595	0	127.595	1	127.595	0	127.595	1	127.595	2	127.595	0	107.522	33	168.733	0	107.522	8	107.522	21	106.926	0	106.926	27	106.926	9	106.926	2
127.602	0	127.602	1	127.602	7	127.602	0	127.602	0	127.602	0	127.602	0	127.602	0	127.602	0	127.602	5	127.602	1	127.602	0	107.529	11	168.741	0	107.529	14	107.529	43	106.933	0	106.933	6	106.933	5	106.933	0
127.609	0	127.609	0	127.609	0	127.609	0	127.609	0	127.609	0	127.609	0	127.609	0	127.609	0	127.609	0	127.609	5	127.609	5	107.535	26	168.75	0	107.535	11	107.535	17	106.939	3	106.939	0	106.939	4	106.939	12
127.616	0	127.616	3	127.616	1	127.616	0	127.616	0	127.616	0	127.616	0	127.616	6	127.616	0	127.616	0	127.616	0	127.616	0	107.542	27	168.758	0	107.542	4	107.542	13	106.946	27	106.946	3	106.946	3	106.946	21
127.624	0	127.624	0	127.624	1	127.624	2	127.624	0	127.624	0	127.624	0	127.624	0	127.624	0	127.624	0	127.624	0	127.624	0	107.549	52	168.766	0	107.549	1	107.549	22	106.953	11	106.953	36	106.953	3	106.953	12
127.631	0	127.631	0	127.631	8	127.631	0	127.631	0	127.631	0	127.631	0	127.631	3	127.631	0	127.631	0	127.631	0	127.631	6	107.556	66	168.775	0	107.556	26	107.556	28	106.959	4	106.959	43	106.959	6	106.959	32
127.638	0	127.638	2	127.638	1	127.638	2	127.638	0	127.638	0	127.638	0	127.638	6	127.638	0	127.638	0	127.638	4	127.638	0	107.562	120	168.783	12	107.562	29	107.562	44	106.966	0	106.966	18	106.966	4	106.966	31
127.646	0	127.646	0	127.646	0	127.646	0	127.646	0	127.646	0	127.646	0	127.646	2	127.646	0	127.646	0	127.646	1	127.646	8	107.569	92	168.791	4	107.569	41	107.569	26	106.972	0	106.972	17	106.972	19	106.972	9
127.653	0	127.653	0	127.653	0	127.653	0	127.653	0	127.653	0	127.653	0	127.653	0	127.653	0	127.653	0	127.653	2	127.653	3	107.576	49	168.8	0	107.576	56	107.576	31	106.979	3	106.979	10	106.979	18	106.979	3
127.66	0	127.66	1	127.66	2	127.66	4	127.66	0	127.66	0	127.66	0	127.66	3	127.66	0	127.66	0	127.66	3	127.66	0	107.582	25	168.808	0	107.582	64	107.582	49	106.986	5	106.986	25	106.986	7	106.986	9
127.667	0	127.667	0	127.667	0	127.667	0	127.667	0	127.667	0	127.667	0	127.667	1	127.667	0	127.667	0	127.667	0	127.667	3	107.589	22	168.816	0	107.589	63	107.589	15	106.992	0	106.992	31	106.992	7	106.992	10
127.675	0	127.675	0	127.675	1	127.675	0	127.675	0	127.675	0	127.675	0	127.675	3	127.675	0	127.675	0	127.675	1	127.675	0	107.596	52	168.825	0	107.596	65	107.596	15	106.999	0	106.999	63	106.999	21	106.999	0
127.682	0	127.682	0	127.682	0	127.682	0	127.682	0	127.682	0	127.682	0	127.682	3	127.682	0	127.682	0	127.682	1	127.682	1	107.602	85	168.833	0	107.602	79	107.602	22	107.006	0	107.006	50	107.006	25	107.006	0
127.689	0	127.689	0	127.689	0	127.689	0	127.689	0	127.689	0	127.689	0	127.689	2	127.689	0	127.689	0	127.689	0	127.689	0	107.609	123	168.841	0	107.609	46	107.609	3	107.012	0	107.012	19	107.012	13	107.012	5
127.696	0	127.696	0	127.696	0	127.696	0	127.696	0	127.696	0	127.696	0	127.696	1	127.696	0	127.696	0	127.696	0	127.696	0	107.616	123	168.85	0	107.616	37	107.616	5	107.019	2	107.019	10	107.019	13	107.019	3
127.704	0	127.704	0	127.704	1	127.704	3	127.704	0	127.704	0	127.704	0	127.704	1	127.704	0	127.704	0	127.704	4	127.704	2	107.622	143	168.858	3	107.622	62	107.622	19	107.026	0	107.026	27	107.026	15	107.026	3
127.711	0	127.711	0	127.711	3	127.711	1	127.711	0	127.711	0	127.711	0	127.711	0	127.711	0	127.711	0	127.711	3	127.711	8	107.629	102	168.866	2	107.629	74	107.629	19	107.032	1	107.032	55	107.032	10	107.032	18
127.718	0	127.718	0	127.718	0	127.718	0	127.718	0	127.718	0	127.718	0	127.718	6	127.718	0	127.718	0	127.718	2	127.718	10	107.636	68	168.875	0	107.636	82	107.636	25	107.039	0	107.039	24	107.039	12	107.039	7
127.726	0	127.726	0	127.726	2	127.726	0	127.726	0	127.726	0	127.726	0	127.726	0	127.726	0	127.726	0	127.726	0	127.726	7	107.643	87	168.883	0	107.643	81	107.643	16	107.045	0	107.045	14	107.045	20	107.045	15
127.733	0	127.733	3	127.733	0	127.733	12	127.733	0	127.733	0	127.733	0	127.733	2	127.733	0	127.733	0	127.733	2	127.733	2	107.649	76	168.891	4	107.649	32	107.649	28	107.052	0	107.052	34	107.052	31	107.052	9
127.74	0	127.74	0	127.74	1	127.74	8	127.74	0	127.74	0	127.74	3	127.74	2	127.74	0	127.74	0	127.74	2	127.74	0	107.656	56	168.9	7	107.656	29	107.656	54	107.059	0	107.059	42	107.059	35	107.059	22
127.747	0	127.747	1	127.747	0	127.747	5	127.747	0	127.747	0	127.747	0	127.747	0	127.747	0	127.747	0	127.747	1	127.747	1	107.663	52	168.908	10	107.663	30	107.663	57	107.065	0	107.065	28	107.065	26	107.065	7
127.755	0	127.755	1	127.755	4	127.755	0	127.755	0	127.755	0	127.755	0	127.755	5	127.755	0	127.755	0	127.755	1	127.755	6	107.669	85	168.916	12	107.669	56	107.669	47	107.072	0	107.072	14	107.072	18	107.072	7
127.762	0	127.762	3	127.762	0	127.762	1	127.762	0	127.762	0	127.762	0	127.762	0	127.762	0	127.762	0	127.762	0	127.762	4	107.676	85	168.925	2	107.676	25	107.676	25	107.079	1	107.079	23	107.079	32	107.079	5
127.769	0	127.769	0	127.769	0	127.769	15	127.769	0	127.769	0	127.769	0	127.769	2	127.769	0	127.769	0	127.769	0	127.769	0	107.683	70	168.933	0	107.683	49	107.683	22	107.085	9	107.085	18	107.085	20	107.085	18
127.776	0	127.776	1	127.776	0	127.776	3	127.776	0	127.776	0	127.776	0	127.776	2	127.776	0	127.776	0	127.776	1	127.776	1	107.689	55	168.941	0	107.689	26	107.689	50	107.092	10	107.092	11	107.092	12	107.092	19
127.784	0	127.784	0	127.784	1	127.784	1	127.784	0	127.784	0	127.784	0	127.784	12	127.784	0	127.784	0	127.784	6	127.784	8	107.696	57	168.95	3	107.696	34	107.696	39	107.099	5	107.099	8	107.099	17	107.099	2
127.791	0	127.791	0	127.791	1	127.791	0	127.791	0	127.791	0	127.791	0	127.791	11	127.791	0	127.791	0	127.791	5	127.791	3	107.703	45	168.958	22	107.703	47	107.703	33	107.105	0	107.105	25	107.105	10	107.105	0
127.798	0	127.798	1	127.798	0	127.798	4	127.798	0	127.798	0	127.798	0	127.798	26	127.798	0	127.798	0	127.798	8	127.798	7	107.709	45	168.967	6	107.709	40	107.709	14	107.112	0	107.112	7	107.112	7	107.112	6
127.806	0	127.806	6	127.806	1	127.806	8	127.806	0	127.806	0	127.806	0	127.806	20	127.806	0	127.806	0	127.806	22	127.806	21	107.716	49	168.975	2	107.716	20	107.716	20	107.118	12	107.118	3	107.118	4	107.118	28
127.813	0	127.813	5	127.813	3	127.813	4	127.813	0	127.813	0	127.813	0	127.813	35	127.813	0	127.813	0	127.813	17	127.813	26	107.723	38	168.983	0	107.723	23	107.723	25	107.125	16	107.125	29	107.125	5	107.125	83
127.82	0	127.82	0	127.82	8	127.82	7	127.82	0	127.82	0	127.82	0	127.82	53	127.82	0	127.82	0	127.82	15	127.82	17	107.73	33	168.992	0	107.73	68	107.73	28	107.132	9	107.132	17	107.132	10	107.132	194
127.827	0	127.827	6	127.827	15	127.827	13	127.827	0	127.827	0	127.827	0	127.827	40	127.827	0	127.827	0	127.827	11	127.827	26	107.736	56	169	0	107.736	50	107.736	44	107.138	10	107.138	18	107.138	20	107.138	389
127.835	0	127.835	10	127.835	23	127.835	18	127.835	0	127.835	0	127.835	0	127.835	55	127.835	0	127.835	0	127.835	11	127.835	30	107.743	84	169.008	0	107.743	23	107.743	18	107.145	29	107.145	10	107.145	39	107.145	677
127.842	0	127.842	6	127.842	41	127.842	24	127.842	0	127.842	0	127.842	0	127.842	109	127.842	1	127.842	0	127.842	7	127.842	36	107.75	114	169.017	0	107.75	13	107.75	14	107.152	37	107.152	18	107.152	30	107.152	1194
127.849	0	127.849	0	127.849	74	127.849	29	127.849	0	127.849	0	127.849	0	127.849	144	127.849	2	127.849	0	127.849	24	127.849	27	107.756	70	169.025	0	107.756	10	107.756	5	107.158	90	107.158	44	107.158	12	107.158	2168
127.857	0	127.857	10	127.857	102	127.857	41	127.857	0	127.857	0	127.857	0	127.857	174	127.857	0	127.857	0	127.857	42	127.857	34	107.763	42	169.033	0	107.763	9	107.763	11	107.165	87	107.165	77	107.165	13	107.165	2903
127.864	0	127.864	26	127.864	134	127.864	50	127.864	0	127.864	0	127.864	0	127.864	211	127.864	0	127.864	0	127.864	57	127.864	24	107.77	37	169.042	1	107.77	11	107.77	4	107.172	100	107.172	170	107.172	14	107.172	4002
127.871	0	127.871	21	127.871	188	127.871	54	127.871	0	127.871	0	127.871	0	127.871	264	127.871	0	127.871	0	127.871	70	127.871	52	107.776	36	169.05	1	107.776	48	107.776	12	107.178	114	107.178	353	107.178	38	107.178	5348
127.878	0	127.878	34	127.878	336	127.878	75	127.878	0	127.878	0	127.878	0	127.878	280	127.878	0	127.878	0	127.878	71	127.878	48	107.783	55	169.058	0	107.783	87	107.783	18	107.185	128	107.185	479	107.185	46	107.185	6585
127.886	0	127.886	34	127.886	452	127.886	120	127.886	0	127.886	0	127.886	0	127.886	292	127.886	0	127.886	0	127.886	77	127.886	46	107.79	71	169.067	0	107.79	44	107.79	21	107.192	156	107.192	450	107.192	35	107.192	7433
127.893	0	127.893	37	127.893	531	127.893	147	127.893	0	127.893	0	127.893	0	127.893	303	127.893	0	127.893	0	127.893	67	127.893	35	107.796	57	169.075	0	107.796	42	107.796	20	107.198	126	107.198	378	107.198	52	107.198	7349
127.9	3	127.9	40	127.9	627	127.9	177	127.9	0	127.9	0	127.9	0	127.9	385	127.9	0	127.9	0	127.9	52	127.9	40	107.803	84	169.083	0	107.803	40	107.803	11	107.205	109	107.205	408	107.205	60	107.205	6802
127.907	3	127.907	34	127.907	653	127.907	196	127.907	0	127.907	0	127.907	0	127.907	431	127.907	0	127.907	2	127.907	49	127.907	70	107.81	95	169.092	0	107.81	10	107.81	21	107.211	138	107.211	293	107.211	66	107.211	6688
127.915	0	127.915	33	127.915	636	127.915	278	127.915	0	127.915	0	127.915	0	127.915	316	127.915	0	127.915	3	127.915	52	127.915	77	107.817	131	169.1	0	107.817	19	107.817	6	107.218	109	107.218	259	107.218	33	107.218	5928
127.922	1	127.922	36	127.922	626	127.922	286	127.922	0	127.922	0	127.922	0	127.922	253	127.922	0	127.922	2	127.922	51	127.922	53	107.823	110	169.108	3	107.823	16	107.823	24	107.225	92	107.225	187	107.225	25	107.225	5239
127.929	0	127.929	23	127.929	588	127.929	277	127.929	1	127.929	0	127.929	0	127.929	170	127.929	0	127.929	0	127.929	48	127.929	30	107.83	86	169.117	18	107.83	0	107.83	31	107.231	102	107.231	110	107.231	54	107.231	4791
127.937	3	127.937	23	127.937	587	127.937	251	127.937	6	127.937	0	127.937	0	127.937	146	127.937	1	127.937	0	127.937	40	127.937	20	107.837	81	169.125	19	107.837	6	107.837	4	107.238	87	107.238	65	107.238	30	107.238	4173
127.944	4	127.944	28	127.944	483	127.944	170	127.944	2	127.944	0	127.944	0	127.944	96	127.944	0	127.944	0	127.944	14	127.944	27	107.843	94	169.133	13	107.843	18	107.843	11	107.245	63	107.245	49	107.245	59	107.245	3612
127.951	1	127.951	22	127.951	346	127.951	142	127.951	0	127.951	0	127.951	0	127.951	81	127.951	0	127.951	2	127.951	6	127.951	13	107.85	107	169.142	2	107.85	38	107.85	0	107.251	70	107.251	26	107.251	57	107.251	2743
127.958	0	127.958	15	127.958	326	127.958	86	127.958	0	127.958	0	127.958	0	127.958	74	127.958	0	127.958	0	127.958	4	127.958	20	107.857	111	169.15	20	107.857	27	107.857	7	107.258	37	107.258	27	107.258	30	107.258	2003
127.966	2	127.966	15	127.966	234	127.966	80	127.966	0	127.966	0	127.966	0	127.966	72	127.966	0	127.966	1	127.966	10	127.966	17	107.863	99	169.158	25	107.863	6	107.863	14	107.265	9	107.265	66	107.265	11	107.265	1604
127.973	0	127.973	13	127.973	177	127.973	71	127.973	0	127.973	0	127.973	0	127.973	73	127.973	0	127.973	0	127.973	7	127.973	6	107.87	97	169.167	9	107.87	5	107.87	25	107.271	22	107.271	64	107.271	11	107.271	1396
127.98	0	127.98	6	127.98	157	127.98	68	127.98	0	127.98	0	127.98	1	127.98	45	127.98	0	127.98	0	127.98	14	127.98	5	107.877	82	169.175	9	107.877	17	107.877	46	107.278	36	107.278	60	107.278	30	107.278	1177
127.988	0	127.988	2	127.988	88	127.988	43	127.988	0	127.988	0	127.988	0	127.988	26	127.988	0	127.988	3	127.988	11	127.988	4	107.884	64	169.183	18	107.884	34	107.884	17	107.285	20	107.285	43	107.285	19	107.285	979
127.995	0	127.995	6	127.995	56	127.995	23	127.995	0	127.995	0	127.995	0	127.995	21	127.995	0	127.995	0	127.995	4	127.995	5	107.89	97	169.192	31	107.89	30	107.89	37	107.291	27	107.291	34	107.291	7	107.291	730
128.002	6	128.002	0	128.002	43	128.002	26	128.002	0	128.002	0	128.002	0	128.002	9	128.002	0	128.002	0	128.002	6	128.002	1	107.897	111	169.2	34	107.897	21	107.897	53	107.298	25	107.298	19	107.298	6	107.298	643
128.009	0	128.009	3	128.009	20	128.009	44	128.009	0	128.009	0	128.009	0	128.009	6	128.009	0	128.009	1	128.009	6	128.009	3	107.904	93	169.208	16	107.904	10	107.904	50	107.304	8	107.304	14	107.304	6	107.304	653
128.017	1	128.017	3	128.017	11	128.017	28	128.017	0	128.017	0	128.017	0	128.017	7	128.017	0	128.017	0	128.017	3	128.017	3	107.91	56	169.217	11	107.91	14	107.91	34	107.311	11	107.311	18	107.311	13	107.311	678
128.024	1	128.024	7	128.024	18	128.024	13	128.024	0	128.024	0	128.024	0	128.024	4	128.024	0	128.024	0	128.024	0	128.024	7	107.917	69	169.225	34	107.917	8	107.917	23	107.318	19	107.318	8	107.318	18	107.318	608
128.031	0	128.031	11	128.031	5	128.031	11	128.031	0	128.031	0	128.031	0	128.031	0	128.031	0	128.031	0	128.031	2	128.031	6	107.924	84	169.234	30	107.924	5	107.924	20	107.324	8	107.324	14	107.324	6	107.324	470
128.039	1	128.039	8	128.039	4	128.039	11	128.039	0	128.039	0	128.039	0	128.039	0	128.039	0	128.039	0	128.039	4	128.039	0	107.93	80	169.242	33	107.93	13	107.93	13	107.331	1	107.331	8	107.331	7	107.331	551
128.046	3	128.046	8	128.046	3	128.046	2	128.046	0	128.046	0	128.046	0	128.046	1	128.046	0	128.046	0	128.046	10	128.046	0	107.937	109	169.25	37	107.937	18	107.937	15	107.338	0	107.338	4	107.338	9	107.338	602
128.053	3	128.053	2	128.053	5	128.053	0	128.053	0	128.053	0	128.053	0	128.053	0	128.053	0	128.053	0	128.053	4	128.053	0	107.944	98	169.259	15	107.944	20	107.944	6	107.344	3	107.344	1	107.344	11	107.344	569
128.06	0	128.06	2	128.06	2	128.06	0	128.06	3	128.06	0	128.06	0	128.06	0	128.06	0	128.06	0	128.06	8	128.06	2	107.951	106	169.267	14	107.951	11	107.951	8	107.351	27	107.351	0	107.351	7	107.351	674
128.068	1	128.068	2	128.068	0	128.068	5	128.068	2	128.068	0	128.068	0	128.068	1	128.068	0	128.068	0	128.068	7	128.068	1	107.957	107	169.275	32	107.957	21	107.957	24	107.358	27	107.358	3	107.358	3	107.358	598
128.075	0	128.075	0	128.075	9	128.075	6	128.075	0	128.075	0	128.075	0	128.075	3	128.075	0	128.075	0	128.075	3	128.075	0	107.964	66	169.284	35	107.964	7	107.964	23	107.364	9	107.364	0	107.364	3	107.364	477
128.082	1	128.082	12	128.082	1	128.082	3	128.082	0	128.082	0	128.082	0	128.082	0	128.082	0	128.082	0	128.082	0	128.082	1	107.971	86	169.292	29	107.971	2	107.971	30	107.371	0	107.371	12	107.371	3	107.371	366
128.09	0	128.09	4	128.09	0	128.09	0	128.09	0	128.09	0	128.09	0	128.09	1	128.09	0	128.09	0	128.09	0	128.09	5	107.977	161	169.3	11	107.977	25	107.977	6	107.378	0	107.378	4	107.378	25	107.378	331
128.097	0	128.097	1	128.097	3	128.097	0	128.097	0	128.097	0	128.097	0	128.097	5	128.097	0	128.097	0	128.097	4	128.097	1	107.984	163	169.309	10	107.984	31	107.984	3	107.384	0	107.384	9	107.384	29	107.384	255
128.104	0	128.104	0	128.104	0	128.104	0	128.104	0	128.104	0	128.104	0	128.104	4	128.104	0	128.104	0	128.104	1	128.104	1	107.991	109	169.317	4	107.991	11	107.991	12	107.391	0	107.391	14	107.391	11	107.391	218
128.111	1	128.111	3	128.111	0	128.111	0	128.111	0	128.111	0	128.111	0	128.111	0	128.111	0	128.111	0	128.111	0	128.111	0	107.997	72	169.325	7	107.997	20	107.997	48	107.397	12	107.397	34	107.397	5	107.397	162
128.119	2	128.119	5	128.119	0	128.119	4	128.119	0	128.119	0	128.119	0	128.119	0	128.119	0	128.119	0	128.119	0	128.119	2	108.004	89	169.334	13	108.004	10	108.004	24	107.404	24	107.404	20	107.404	3	107.404	135
128.126	1	128.126	0	128.126	0	128.126	5	128.126	0	128.126	0	128.126	0	128.126	0	128.126	0	128.126	0	128.126	1	128.126	1	108.011	87	169.342	8	108.011	11	108.011	44	107.411	8	107.411	22	107.411	5	107.411	124
128.133	0	128.133	0	128.133	0	128.133	1	128.133	0	128.133	0	128.133	0	128.133	3	128.133	0	128.133	0	128.133	0	128.133	0	108.018	84	169.35	4	108.018	6	108.018	44	107.417	1	107.417	13	107.417	14	107.417	120
128.141	0	128.141	0	128.141	2	128.141	0	128.141	0	128.141	0	128.141	0	128.141	3	128.141	0	128.141	0	128.141	0	128.141	6	108.024	64	169.359	0	108.024	0	108.024	29	107.424	0	107.424	26	107.424	14	107.424	96
128.148	0	128.148	3	128.148	0	128.148	0	128.148	0	128.148	0	128.148	0	128.148	6	128.148	0	128.148	0	128.148	0	128.148	4	108.031	84	169.367	1	108.031	1	108.031	33	107.431	0	107.431	38	107.431	31	107.431	79
128.155	0	128.155	0	128.155	5	128.155	0	128.155	0	128.155	0	128.155	0	128.155	2	128.155	0	128.155	0	128.155	1	128.155	6	108.038	80	169.375	5	108.038	5	108.038	43	107.437	2	107.437	31	107.437	12	107.437	85
128.162	0	128.162	3	128.162	3	128.162	1	128.162	0	128.162	0	128.162	0	128.162	4	128.162	0	128.162	0	128.162	2	128.162	2	108.044	66	169.384	34	108.044	12	108.044	64	107.444	0	107.444	13	107.444	4	107.444	68
128.17	0	128.17	0	128.17	5	128.17	0	128.17	0	128.17	0	128.17	0	128.17	16	128.17	0	128.17	0	128.17	0	128.17	9	108.051	52	169.392	45	108.051	10	108.051	53	107.451	0	107.451	9	107.451	5	107.451	59
128.177	0	128.177	0	128.177	3	128.177	1	128.177	0	128.177	0	128.177	0	128.177	13	128.177	0	128.177	0	128.177	0	128.177	5	108.058	69	169.401	22	108.058	9	108.058	28	107.457	0	107.457	28	107.457	7	107.457	46
128.184	0	128.184	2	128.184	1	128.184	0	128.184	0	128.184	0	128.184	0	128.184	2	128.184	0	128.184	0	128.184	0	128.184	2	108.064	65	169.409	8	108.064	12	108.064	21	107.464	0	107.464	30	107.464	1	107.464	43
128.192	0	128.192	0	128.192	0	128.192	0	128.192	0	128.192	0	128.192	0	128.192	1	128.192	0	128.192	0	128.192	5	128.192	2	108.071	53	169.417	2	108.071	26	108.071	62	107.471	0	107.471	58	107.471	0	107.471	63
128.199	0	128.199	2	128.199	0	128.199	2	128.199	0	128.199	0	128.199	0	128.199	7	128.199	0	128.199	0	128.199	0	128.199	7	108.078	37	169.426	24	108.078	20	108.078	37	107.477	0	107.477	61	107.477	0	107.477	36
128.206	0	128.206	5	128.206	1	128.206	0	128.206	0	128.206	0	128.206	0	128.206	10	128.206	0	128.206	0	128.206	1	128.206	3	108.085	49	169.434	8	108.085	16	108.085	19	107.484	0	107.484	34	107.484	9	107.484	63
128.213	0	128.213	3	128.213	0	128.213	0	128.213	0	128.213	0	128.213	0	128.213	11	128.213	0	128.213	0	128.213	10	128.213	2	108.091	108	169.442	1	108.091	38	108.091	8	107.491	0	107.491	18	107.491	11	107.491	93
128.221	0	128.221	0	128.221	1	128.221	0	128.221	0	128.221	0	128.221	0	128.221	0	128.221	0	128.221	0	128.221	6	128.221	7	108.098	93	169.451	1	108.098	19	108.098	21	107.497	2	107.497	10	107.497	39	107.497	61
128.228	0	128.228	0	128.228	2	128.228	0	128.228	0	128.228	0	128.228	0	128.228	3	128.228	0	128.228	0	128.228	3	128.228	2	108.105	50	169.459	1	108.105	1	108.105	27	107.504	1	107.504	2	107.504	40	107.504	49
128.235	0	128.235	3	128.235	2	128.235	8	128.235	0	128.235	0	128.235	0	128.235	1	128.235	0	128.235	0	128.235	1	128.235	0	108.111	40	169.467	4	108.111	20	108.111	8	107.511	0	107.511	4	107.511	20	107.511	44
128.243	0	128.243	0	128.243	1	128.243	3	128.243	0	128.243	0	128.243	0	128.243	1	128.243	0	128.243	0	128.243	0	128.243	7	108.118	29	169.476	4	108.118	39	108.118	4	107.517	0	107.517	32	107.517	34	107.517	52
128.25	0	128.25	0	128.25	0	128.25	0	128.25	0	128.25	0	128.25	0	128.25	4	128.25	0	128.25	0	128.25	1	128.25	1	108.125	79	169.484	0	108.125	64	108.125	16	107.524	1	107.524	30	107.524	37	107.524	38
128.257	0	128.257	0	128.257	0	128.257	3	128.257	0	128.257	0	128.257	0	128.257	0	128.257	0	128.257	1	128.257	0	128.257	0	108.132	108	169.492	0	108.132	62	108.132	15	107.53	14	107.53	19	107.53	23	107.53	18
128.264	0	128.264	7	128.264	0	128.264	0	128.264	0	128.264	0	128.264	0	128.264	0	128.264	0	128.264	0	128.264	0	128.264	1	108.138	116	169.501	0	108.138	79	108.138	9	107.537	12	107.537	47	107.537	12	107.537	26
128.272	1	128.272	18	128.272	0	128.272	0	128.272	0	128.272	0	128.272	0	128.272	4	128.272	0	128.272	1	128.272	0	128.272	2	108.145	103	169.509	0	108.145	95	108.145	13	107.544	4	107.544	19	107.544	7	107.544	23
128.279	1	128.279	4	128.279	0	128.279	0	128.279	0	128.279	0	128.279	0	128.279	2	128.279	0	128.279	0	128.279	0	128.279	1	108.152	57	169.518	0	108.152	114	108.152	15	107.55	0	107.55	0	107.55	5	107.55	26
128.286	0	128.286	1	128.286	0	128.286	1	128.286	0	128.286	0	128.286	0	128.286	2	128.286	0	128.286	0	128.286	3	128.286	7	108.158	48	169.526	0	108.158	142	108.158	6	107.557	0	107.557	11	107.557	4	107.557	10
128.294	0	128.294	0	128.294	1	128.294	2	128.294	0	128.294	0	128.294	0	128.294	4	128.294	0	128.294	0	128.294	0	128.294	3	108.165	48	169.534	14	108.165	143	108.165	5	107.564	7	107.564	25	107.564	3	107.564	4
128.301	0	128.301	0	128.301	9	128.301	2	128.301	0	128.301	0	128.301	0	128.301	7	128.301	0	128.301	0	128.301	1	128.301	2	108.172	67	169.543	19	108.172	172	108.172	29	107.57	35	107.57	14	107.57	5	107.57	22
128.308	0	128.308	0	128.308	12	128.308	2	128.308	0	128.308	0	128.308	0	128.308	3	128.308	0	128.308	0	128.308	4	128.308	0	108.178	73	169.551	5	108.178	183	108.178	44	107.577	14	107.577	8	107.577	6	107.577	17
128.315	0	128.315	0	128.315	1	128.315	1	128.315	0	128.315	0	128.315	0	128.315	0	128.315	0	128.315	0	128.315	8	128.315	1	108.185	83	169.559	5	108.185	177	108.185	23	107.584	5	107.584	11	107.584	8	107.584	6
128.323	0	128.323	0	128.323	5	128.323	1	128.323	0	128.323	0	128.323	0	128.323	1	128.323	0	128.323	0	128.323	4	128.323	2	108.192	81	169.568	3	108.192	148	108.192	12	107.59	3	107.59	8	107.59	14	107.59	10
128.33	0	128.33	0	128.33	3	128.33	0	128.33	0	128.33	0	128.33	0	128.33	0	128.33	0	128.33	0	128.33	3	128.33	0	108.199	49	169.576	8	108.199	214	108.199	20	107.597	22	107.597	16	107.597	11	107.597	17
128.337	0	128.337	12	128.337	0	128.337	1	128.337	0	128.337	0	128.337	0	128.337	0	128.337	0	128.337	0	128.337	2	128.337	1	108.205	69	169.584	3	108.205	187	108.205	5	107.604	43	107.604	16	107.604	8	107.604	29
128.345	0	128.345	21	128.345	0	128.345	0	128.345	0	128.345	0	128.345	0	128.345	0	128.345	0	128.345	0	128.345	0	128.345	0	108.212	133	169.593	3	108.212	107	108.212	19	107.61	19	107.61	41	107.61	3	107.61	20
128.352	0	128.352	6	128.352	1	128.352	0	128.352	0	128.352	0	128.352	0	128.352	4	128.352	0	128.352	0	128.352	0	128.352	0	108.219	108	169.601	1	108.219	69	108.219	33	107.617	6	107.617	33	107.617	3	107.617	47
128.359	0	128.359	2	128.359	0	128.359	1	128.359	0	128.359	0	128.359	0	128.359	1	128.359	0	128.359	0	128.359	5	128.359	1	108.225	76	169.609	0	108.225	68	108.225	60	107.624	1	107.624	28	107.624	8	107.624	40
128.367	0	128.367	2	128.367	2	128.367	2	128.367	0	128.367	0	128.367	3	128.367	7	128.367	0	128.367	0	128.367	2	128.367	6	108.232	54	169.618	0	108.232	33	108.232	34	107.63	2	107.63	10	107.63	0	107.63	22
128.374	0	128.374	0	128.374	1	128.374	1	128.374	0	128.374	0	128.374	0	128.374	2	128.374	0	128.374	0	128.374	1	128.374	4	108.239	44	169.626	0	108.239	24	108.239	37	107.637	0	107.637	3	107.637	1	107.637	10
128.381	0	128.381	0	128.381	0	128.381	0	128.381	0	128.381	0	128.381	0	128.381	0	128.381	0	128.381	0	128.381	12	128.381	5	108.246	88	169.635	0	108.246	20	108.246	35	107.644	5	107.644	20	107.644	7	107.644	1
128.388	0	128.388	0	128.388	0	128.388	0	128.388	0	128.388	0	128.388	0	128.388	5	128.388	0	128.388	0	128.388	4	128.388	6	108.252	72	169.643	0	108.252	80	108.252	52	107.65	0	107.65	8	107.65	9	107.65	17
128.396	0	128.396	0	128.396	0	128.396	4	128.396	0	128.396	0	128.396	0	128.396	3	128.396	0	128.396	0	128.396	2	128.396	1	108.259	65	169.651	0	108.259	43	108.259	26	107.657	4	107.657	10	107.657	3	107.657	18
128.403	0	128.403	0	128.403	0	128.403	1	128.403	0	128.403	0	128.403	0	128.403	0	128.403	0	128.403	0	128.403	10	128.403	1	108.266	76	169.66	0	108.266	32	108.266	7	107.664	0	107.664	17	107.664	0	107.664	2
128.41	0	128.41	0	128.41	0	128.41	0	128.41	0	128.41	0	128.41	0	128.41	1	128.41	0	128.41	0	128.41	7	128.41	3	108.272	83	169.668	5	108.272	29	108.272	22	107.67	0	107.67	14	107.67	0	107.67	1
128.418	0	128.418	0	128.418	0	128.418	0	128.418	0	128.418	0	128.418	0	128.418	3	128.418	0	128.418	0	128.418	1	128.418	2	108.279	103	169.676	13	108.279	13	108.279	30	107.677	0	107.677	1	107.677	6	107.677	0
128.425	0	128.425	5	128.425	0	128.425	1	128.425	0	128.425	0	128.425	0	128.425	1	128.425	0	128.425	0	128.425	2	128.425	4	108.286	57	169.685	2	108.286	21	108.286	52	107.684	0	107.684	9	107.684	11	107.684	4
128.432	0	128.432	6	128.432	1	128.432	3	128.432	0	128.432	0	128.432	0	128.432	0	128.432	0	128.432	0	128.432	0	128.432	1	108.293	63	169.693	1	108.293	36	108.293	31	107.69	0	107.69	0	107.69	1	107.69	0
128.439	0	128.439	0	128.439	0	128.439	0	128.439	0	128.439	0	128.439	0	128.439	0	128.439	0	128.439	0	128.439	3	128.439	1	108.299	58	169.701	0	108.299	22	108.299	13	107.697	0	107.697	3	107.697	0	107.697	0
128.447	0	128.447	0	128.447	0	128.447	0	128.447	0	128.447	0	128.447	0	128.447	0	128.447	0	128.447	0	128.447	3	128.447	10	108.306	110	169.71	0	108.306	42	108.306	69	107.703	0	107.703	0	107.703	0	107.703	0
128.454	0	128.454	0	128.454	1	128.454	6	128.454	0	128.454	0	128.454	0	128.454	0	128.454	0	128.454	0	128.454	0	128.454	2	108.313	111	169.718	12	108.313	31	108.313	65	107.71	3	107.71	0	107.71	0	107.71	0
128.461	0	128.461	0	128.461	0	128.461	0	128.461	0	128.461	0	128.461	0	128.461	1	128.461	0	128.461	0	128.461	0	128.461	3	108.319	117	169.726	31	108.319	15	108.319	64	107.717	0	107.717	5	107.717	0	107.717	0
128.469	0	128.469	0	128.469	0	128.469	1	128.469	0	128.469	0	128.469	0	128.469	0	128.469	0	128.469	0	128.469	7	128.469	0	108.326	94	169.735	14	108.326	47	108.326	54	107.723	0	107.723	11	107.723	0	107.723	1
128.476	6	128.476	3	128.476	0	128.476	1	128.476	0	128.476	0	128.476	0	128.476	0	128.476	0	128.476	0	128.476	3	128.476	1	108.333	76	169.743	4	108.333	21	108.333	60	107.73	0	107.73	8	107.73	0	107.73	2
128.483	1	128.483	0	128.483	0	128.483	1	128.483	0	128.483	0	128.483	0	128.483	0	128.483	0	128.483	0	128.483	0	128.483	1	108.339	73	169.752	11	108.339	13	108.339	32	107.737	0	107.737	16	107.737	0	107.737	8
128.491	0	128.491	0	128.491	1	128.491	5	128.491	0	128.491	0	128.491	0	128.491	0	128.491	0	128.491	0	128.491	1	128.491	6	108.346	65	169.76	11	108.346	28	108.346	11	107.743	0	107.743	25	107.743	0	107.743	14
128.498	0	128.498	1	128.498	5	128.498	1	128.498	0	128.498	0	128.498	0	128.498	0	128.498	0	128.498	0	128.498	3	128.498	0	108.353	64	169.768	6	108.353	52	108.353	22	107.75	6	107.75	8	107.75	4	107.75	24
128.505	0	128.505	1	128.505	1	128.505	1	128.505	0	128.505	0	128.505	0	128.505	5	128.505	0	128.505	0	128.505	1	128.505	4	108.36	85	169.777	1	108.36	50	108.36	28	107.757	12	107.757	16	107.757	3	107.757	7
128.512	0	128.512	7	128.512	0	128.512	1	128.512	0	128.512	0	128.512	0	128.512	2	128.512	0	128.512	0	128.512	4	128.512	0	108.366	93	169.785	0	108.366	44	108.366	25	107.763	8	107.763	27	107.763	8	107.763	7
128.52	0	128.52	8	128.52	1	128.52	1	128.52	0	128.52	0	128.52	0	128.52	0	128.52	0	128.52	0	128.52	0	128.52	0	108.373	74	169.793	0	108.373	21	108.373	30	107.77	9	107.77	22	107.77	26	107.77	12
128.527	1	128.527	2	128.527	0	128.527	0	128.527	0	128.527	0	128.527	0	128.527	4	128.527	0	128.527	0	128.527	0	128.527	2	108.38	84	169.802	3	108.38	2	108.38	18	107.777	11	107.777	7	107.777	25	107.777	25
128.534	0	128.534	5	128.534	0	128.534	0	128.534	0	128.534	0	128.534	0	128.534	0	128.534	0	128.534	0	128.534	8	128.534	0	108.386	90	169.81	12	108.386	0	108.386	7	107.783	8	107.783	2	107.783	21	107.783	10
128.542	0	128.542	0	128.542	0	128.542	0	128.542	0	128.542	0	128.542	0	128.542	1	128.542	0	128.542	0	128.542	1	128.542	2	108.393	87	169.818	4	108.393	0	108.393	9	107.79	10	107.79	2	107.79	11	107.79	26
128.549	0	128.549	0	128.549	0	128.549	2	128.549	0	128.549	0	128.549	0	128.549	0	128.549	0	128.549	0	128.549	0	128.549	1	108.4	102	169.827	1	108.4	2	108.4	11	107.797	4	107.797	0	107.797	5	107.797	32
128.556	0	128.556	0	128.556	3	128.556	1	128.556	0	128.556	0	128.556	0	128.556	0	128.556	0	128.556	0	128.556	0	128.556	2	108.407	98	169.835	0	108.407	0	108.407	13	107.803	1	107.803	11	107.803	4	107.803	21
128.563	0	128.563	3	128.563	4	128.563	0	128.563	0	128.563	0	128.563	0	128.563	1	128.563	0	128.563	0	128.563	3	128.563	3	108.413	62	169.844	0	108.413	20	108.413	30	107.81	22	107.81	41	107.81	10	107.81	25
128.571	0	128.571	1	128.571	0	128.571	0	128.571	0	128.571	0	128.571	0	128.571	6	128.571	0	128.571	0	128.571	2	128.571	0	108.42	34	169.852	0	108.42	28	108.42	44	107.817	43	107.817	16	107.817	7	107.817	25
128.578	0	128.578	0	128.578	0	128.578	2	128.578	0	128.578	0	128.578	0	128.578	0	128.578	0	128.578	0	128.578	0	128.578	0	108.427	21	169.86	0	108.427	14	108.427	57	107.823	15	107.823	21	107.823	8	107.823	9
128.585	7	128.585	0	128.585	0	128.585	0	128.585	0	128.585	0	128.585	0	128.585	0	128.585	0	128.585	0	128.585	2	128.585	1	108.433	18	169.869	0	108.433	14	108.433	24	107.83	4	107.83	12	107.83	5	107.83	3
128.593	9	128.593	2	128.593	1	128.593	1	128.593	0	128.593	0	128.593	0	128.593	1	128.593	0	128.593	0	128.593	3	128.593	11	108.44	51	169.877	0	108.44	8	108.44	12	107.837	0	107.837	1	107.837	7	107.837	14
128.6	2	128.6	6	128.6	0	128.6	0	128.6	0	128.6	0	128.6	0	128.6	2	128.6	0	128.6	0	128.6	2	128.6	10	108.447	82	169.885	1	108.447	24	108.447	23	107.843	0	107.843	0	107.843	13	107.843	31
128.607	0	128.607	1	128.607	0	128.607	0	128.607	0	128.607	0	128.607	0	128.607	5	128.607	0	128.607	0	128.607	0	128.607	2	108.454	78	169.894	7	108.454	27	108.454	18	107.85	1	107.85	7	107.85	6	107.85	5
128.615	0	128.615	3	128.615	2	128.615	3	128.615	0	128.615	0	128.615	0	128.615	7	128.615	0	128.615	0	128.615	0	128.615	0	108.46	85	169.902	0	108.46	8	108.46	7	107.857	14	107.857	23	107.857	5	107.857	7
128.622	0	128.622	5	128.622	0	128.622	2	128.622	0	128.622	0	128.622	0	128.622	0	128.622	0	128.622	0	128.622	3	128.622	1	108.467	58	169.91	0	108.467	3	108.467	2	107.863	8	107.863	21	107.863	4	107.863	15
128.629	0	128.629	4	128.629	0	128.629	3	128.629	0	128.629	0	128.629	0	128.629	0	128.629	0	128.629	0	128.629	7	128.629	1	108.474	72	169.919	0	108.474	0	108.474	5	107.87	2	107.87	18	107.87	31	107.87	3
128.636	0	128.636	3	128.636	0	128.636	7	128.636	0	128.636	0	128.636	0	128.636	3	128.636	0	128.636	0	128.636	12	128.636	2	108.48	94	169.927	0	108.48	12	108.48	8	107.877	0	107.877	8	107.877	48	107.877	0
128.644	0	128.644	2	128.644	0	128.644	7	128.644	0	128.644	0	128.644	0	128.644	2	128.644	0	128.644	0	128.644	10	128.644	0	108.487	99	169.936	0	108.487	38	108.487	23	107.883	0	107.883	6	107.883	22	107.883	8
128.651	0	128.651	0	128.651	0	128.651	0	128.651	0	128.651	0	128.651	0	128.651	8	128.651	0	128.651	0	128.651	13	128.651	11	108.494	55	169.944	0	108.494	20	108.494	25	107.89	0	107.89	5	107.89	14	107.89	7
128.658	0	128.658	0	128.658	0	128.658	4	128.658	0	128.658	0	128.658	0	128.658	2	128.658	0	128.658	0	128.658	0	128.658	4	108.501	53	169.952	0	108.501	10	108.501	36	107.897	0	107.897	11	107.897	6	107.897	2
128.666	0	128.666	0	128.666	0	128.666	3	128.666	0	128.666	0	128.666	0	128.666	1	128.666	0	128.666	0	128.666	0	128.666	0	108.507	79	169.961	3	108.507	31	108.507	76	107.903	0	107.903	11	107.903	4	107.903	0
128.673	0	128.673	3	128.673	0	128.673	1	128.673	1	128.673	0	128.673	0	128.673	0	128.673	0	128.673	0	128.673	1	128.673	1	108.514	95	169.969	0	108.514	13	108.514	76	107.91	0	107.91	18	107.91	9	107.91	1
128.68	0	128.68	0	128.68	0	128.68	0	128.68	0	128.68	0	128.68	0	128.68	0	128.68	0	128.68	0	128.68	2	128.68	1	108.521	105	169.977	0	108.521	15	108.521	31	107.917	0	107.917	30	107.917	10	107.917	2
128.688	0	128.688	0	128.688	0	128.688	7	128.688	0	128.688	0	128.688	0	128.688	1	128.688	0	128.688	0	128.688	1	128.688	0	108.528	83	169.986	0	108.528	37	108.528	35	107.923	0	107.923	22	107.923	11	107.923	17
128.695	0	128.695	0	128.695	0	128.695	3	128.695	0	128.695	0	128.695	0	128.695	7	128.695	0	128.695	0	128.695	1	128.695	5	108.534	61	169.994	0	108.534	10	108.534	98	107.93	0	107.93	34	107.93	17	107.93	7
128.702	0	128.702	0	128.702	0	128.702	8	128.702	0	128.702	0	128.702	0	128.702	6	128.702	0	128.702	0	128.702	0	128.702	3	108.541	51	170.002	3	108.541	9	108.541	101	107.937	0	107.937	18	107.937	16	107.937	1
128.709	0	128.709	0	128.709	4	128.709	20	128.709	0	128.709	0	128.709	0	128.709	10	128.709	0	128.709	0	128.709	7	128.709	2	108.548	62	170.011	0	108.548	33	108.548	125	107.943	1	107.943	15	107.943	6	107.943	10
128.717	0	128.717	0	128.717	0	128.717	13	128.717	0	128.717	0	128.717	0	128.717	16	128.717	0	128.717	0	128.717	7	128.717	0	108.554	55	170.019	0	108.554	40	108.554	128	107.95	11	107.95	23	107.95	22	107.95	19
128.724	0	128.724	5	128.724	3	128.724	10	128.724	0	128.724	0	128.724	0	128.724	8	128.724	0	128.724	0	128.724	1	128.724	0	108.561	54	170.028	0	108.561	107	108.561	279	107.957	12	107.957	5	107.957	30	107.957	7
128.731	0	128.731	6	128.731	0	128.731	1	128.731	0	128.731	0	128.731	0	128.731	2	128.731	0	128.731	0	128.731	0	128.731	0	108.568	84	170.036	0	108.568	279	108.568	418	107.963	6	107.963	8	107.963	12	107.963	13
128.739	0	128.739	9	128.739	0	128.739	8	128.739	0	128.739	0	128.739	0	128.739	0	128.739	0	128.739	0	128.739	0	128.739	1	108.575	119	170.044	0	108.575	537	108.575	574	107.97	0	107.97	18	107.97	10	107.97	10
128.746	0	128.746	4	128.746	0	128.746	5	128.746	0	128.746	0	128.746	0	128.746	16	128.746	0	128.746	0	128.746	8	128.746	2	108.581	89	170.053	0	108.581	1113	108.581	973	107.977	0	107.977	8	107.977	5	107.977	2
128.753	0	128.753	0	128.753	0	128.753	1	128.753	0	128.753	0	128.753	0	128.753	15	128.753	0	128.753	0	128.753	6	128.753	3	108.588	71	170.061	4	108.588	1920	108.588	1470	107.983	0	107.983	17	107.983	3	107.983	0
128.761	0	128.761	0	128.761	0	128.761	0	128.761	0	128.761	0	128.761	0	128.761	21	128.761	0	128.761	0	128.761	3	128.761	3	108.595	75	170.069	16	108.595	2338	108.595	2001	107.99	0	107.99	4	107.99	11	107.99	13
128.768	0	128.768	0	128.768	3	128.768	3	128.768	0	128.768	0	128.768	0	128.768	25	128.768	0	128.768	0	128.768	9	128.768	1	108.601	122	170.078	5	108.601	2714	108.601	3104	107.997	0	107.997	5	107.997	11	107.997	41
128.775	0	128.775	0	128.775	0	128.775	6	128.775	0	128.775	0	128.775	0	128.775	31	128.775	0	128.775	0	128.775	4	128.775	1	108.608	71	170.086	0	108.608	2944	108.608	4551	108.003	5	108.003	8	108.003	3	108.003	44
128.783	0	128.783	0	128.783	0	128.783	17	128.783	0	128.783	0	128.783	0	128.783	40	128.783	0	128.783	0	128.783	8	128.783	2	108.615	56	170.095	0	108.615	2888	108.615	5733	108.01	23	108.01	19	108.01	3	108.01	16
128.79	0	128.79	0	128.79	4	128.79	19	128.79	0	128.79	0	128.79	0	128.79	80	128.79	0	128.79	0	128.79	18	128.79	4	108.622	90	170.103	0	108.622	2733	108.622	6162	108.017	8	108.017	9	108.017	1	108.017	8
128.797	0	128.797	1	128.797	8	128.797	18	128.797	0	128.797	0	128.797	0	128.797	184	128.797	0	128.797	0	128.797	38	128.797	4	108.628	83	170.111	0	108.628	2298	108.628	5869	108.023	1	108.023	7	108.023	5	108.023	13
128.804	0	128.804	0	128.804	19	128.804	21	128.804	0	128.804	0	128.804	0	128.804	250	128.804	0	128.804	0	128.804	96	128.804	16	108.635	71	170.12	0	108.635	1902	108.635	5046	108.03	17	108.03	9	108.03	3	108.03	4
128.812	0	128.812	9	128.812	69	128.812	37	128.812	0	128.812	0	128.812	0	128.812	407	128.812	0	128.812	0	128.812	200	128.812	42	108.642	158	170.128	0	108.642	1743	108.642	4072	108.037	7	108.037	4	108.037	4	108.037	1
128.819	0	128.819	25	128.819	103	128.819	57	128.819	0	128.819	0	128.819	0	128.819	554	128.819	0	128.819	0	128.819	410	128.819	92	108.648	137	170.136	0	108.648	1567	108.648	3451	108.043	3	108.043	4	108.043	16	108.043	7
128.826	0	128.826	71	128.826	240	128.826	114	128.826	0	128.826	0	128.826	0	128.826	761	128.826	0	128.826	0	128.826	726	128.826	206	108.655	126	170.145	0	108.655	1366	108.655	2750	108.05	0	108.05	8	108.05	12	108.05	16
128.834	0	128.834	122	128.834	406	128.834	157	128.834	0	128.834	0	128.834	0	128.834	1049	128.834	0	128.834	0	128.834	1020	128.834	324	108.662	110	170.153	0	108.662	1199	108.662	2039	108.057	0	108.057	14	108.057	6	108.057	22
128.841	0	128.841	199	128.841	714	128.841	255	128.841	0	128.841	0	128.841	0	128.841	1454	128.841	0	128.841	0	128.841	1485	128.841	477	108.669	68	170.161	9	108.669	845	108.669	1186	108.063	2	108.063	16	108.063	16	108.063	48
128.848	0	128.848	288	128.848	1056	128.848	380	128.848	0	128.848	0	128.848	0	128.848	1932	128.848	0	128.848	0	128.848	1933	128.848	677	108.675	74	170.17	2	108.675	554	108.675	645	108.07	4	108.07	10	108.07	9	108.07	56
128.856	0	128.856	357	128.856	1604	128.856	580	128.856	0	128.856	0	128.856	0	128.856	2321	128.856	0	128.856	8	128.856	2456	128.856	822	108.682	66	170.178	5	108.682	467	108.682	395	108.077	0	108.077	4	108.077	18	108.077	31
128.863	0	128.863	436	128.863	2210	128.863	877	128.863	0	128.863	0	128.863	0	128.863	2648	128.863	0	128.863	12	128.863	2904	128.863	1103	108.689	62	170.187	0	108.689	406	108.689	248	108.083	11	108.083	16	108.083	14	108.083	31
128.87	0	128.87	602	128.87	2841	128.87	1269	128.87	0	128.87	0	128.87	0	128.87	3008	128.87	0	128.87	7	128.87	3336	128.87	1276	108.696	89	170.195	9	108.696	408	108.696	201	108.09	5	108.09	6	108.09	14	108.09	24
128.877	0	128.877	668	128.877	3666	128.877	1910	128.877	0	128.877	0	128.877	0	128.877	3301	128.877	0	128.877	7	128.877	3580	128.877	1519	108.702	129	170.203	37	108.702	331	108.702	178	108.097	0	108.097	11	108.097	7	108.097	10
128.885	0	128.885	674	128.885	4400	128.885	2727	128.885	12	128.885	0	128.885	0	128.885	3577	128.885	8	128.885	11	128.885	3566	128.885	1391	108.709	124	170.212	115	108.709	221	108.709	93	108.103	5	108.103	27	108.103	14	108.103	2
128.892	0	128.892	755	128.892	4997	128.892	3438	128.892	38	128.892	0	128.892	0	128.892	3672	128.892	23	128.892	20	128.892	3301	128.892	1397	108.716	142	170.22	100	108.716	137	108.716	109	108.11	24	108.11	27	108.11	9	108.11	6
128.899	2	128.899	842	128.899	5374	128.899	3970	128.899	32	128.899	0	128.899	0	128.899	3549	128.899	25	128.899	27	128.899	2815	128.899	1273	108.722	141	170.228	76	108.722	104	108.722	108	108.117	8	108.117	18	108.117	17	108.117	40
128.907	2	128.907	740	128.907	5237	128.907	4151	128.907	26	128.907	0	128.907	0	128.907	3288	128.907	22	128.907	11	128.907	2392	128.907	1003	108.729	91	170.237	59	108.729	89	108.729	71	108.123	6	108.123	33	108.123	19	108.123	20
128.914	15	128.914	794	128.914	4869	128.914	4133	128.914	23	128.914	0	128.914	4	128.914	2745	128.914	27	128.914	17	128.914	1998	128.914	836	108.736	82	170.245	47	108.736	123	108.736	36	108.13	3	108.13	13	108.13	35	108.13	33
128.921	10	128.921	742	128.921	4519	128.921	3961	128.921	12	128.921	0	128.921	1	128.921	2164	128.921	48	128.921	24	128.921	1600	128.921	549	108.743	89	170.254	45	108.743	146	108.743	58	108.137	17	108.137	18	108.137	19	108.137	24
128.929	19	128.929	684	128.929	3904	128.929	3375	128.929	28	128.929	2	128.929	3	128.929	1728	128.929	29	128.929	19	128.929	1093	128.929	338	108.749	75	170.262	63	108.749	96	108.749	93	108.143	23	108.143	35	108.143	9	108.143	46
128.936	24	128.936	641	128.936	3411	128.936	2819	128.936	27	128.936	0	128.936	4	128.936	1240	128.936	28	128.936	10	128.936	796	128.936	235	108.756	63	170.27	60	108.756	52	108.756	75	108.15	22	108.15	32	108.15	14	108.15	88
128.943	26	128.943	634	128.943	2795	128.943	2346	128.943	23	128.943	0	128.943	12	128.943	915	128.943	19	128.943	18	128.943	556	128.943	138	108.763	83	170.279	85	108.763	90	108.763	50	108.157	3	108.157	63	108.157	13	108.157	180
128.951	31	128.951	514	128.951	2089	128.951	1839	128.951	16	128.951	0	128.951	5	128.951	707	128.951	11	128.951	15	128.951	438	128.951	111	108.77	107	170.287	40	108.77	114	108.77	34	108.163	0	108.163	39	108.163	6	108.163	275
128.958	35	128.958	325	128.958	1636	128.958	1509	128.958	15	128.958	2	128.958	17	128.958	547	128.958	7	128.958	22	128.958	330	128.958	70	108.776	184	170.295	9	108.776	96	108.776	18	108.17	1	108.17	106	108.17	9	108.17	257
128.965	22	128.965	192	128.965	1256	128.965	1144	128.965	26	128.965	7	128.965	16	128.965	427	128.965	2	128.965	15	128.965	248	128.965	53	108.783	130	170.304	6	108.783	80	108.783	62	108.177	12	108.177	122	108.177	30	108.177	388
128.973	6	128.973	96	128.973	929	128.973	867	128.973	18	128.973	1	128.973	7	128.973	350	128.973	4	128.973	8	128.973	211	128.973	19	108.79	78	170.312	22	108.79	81	108.79	68	108.183	26	108.183	194	108.183	32	108.183	551
128.98	4	128.98	38	128.98	675	128.98	648	128.98	6	128.98	0	128.98	1	128.98	252	128.98	1	128.98	6	128.98	147	128.98	22	108.796	64	170.321	47	108.796	91	108.796	30	108.19	8	108.19	207	108.19	41	108.19	669
128.987	6	128.987	37	128.987	427	128.987	451	128.987	3	128.987	0	128.987	0	128.987	194	128.987	0	128.987	0	128.987	96	128.987	17	108.803	79	170.329	13	108.803	115	108.803	24	108.197	25	108.197	139	108.197	32	108.197	799
128.994	0	128.994	22	128.994	274	128.994	374	128.994	0	128.994	0	128.994	3	128.994	140	128.994	0	128.994	0	128.994	74	128.994	27	108.81	75	170.337	20	108.81	93	108.81	13	108.203	36	108.203	99	108.203	16	108.203	954
129.002	1	129.002	6	129.002	188	129.002	326	129.002	3	129.002	0	129.002	0	129.002	106	129.002	0	129.002	4	129.002	41	129.002	14	108.817	52	170.346	12	108.817	61	108.817	9	108.21	42	108.21	79	108.21	41	108.21	1118
129.009	0	129.009	5	129.009	142	129.009	273	129.009	0	129.009	0	129.009	2	129.009	89	129.009	0	129.009	2	129.009	31	129.009	9	108.823	48	170.354	3	108.823	80	108.823	13	108.217	42	108.217	54	108.217	33	108.217	1109
129.016	4	129.016	18	129.016	87	129.016	210	129.016	0	129.016	0	129.016	0	129.016	74	129.016	0	129.016	0	129.016	23	129.016	6	108.83	72	170.362	7	108.83	66	108.83	23	108.223	23	108.223	89	108.223	14	108.223	1110
129.024	4	129.024	6	129.024	56	129.024	134	129.024	0	129.024	0	129.024	0	129.024	46	129.024	0	129.024	0	129.024	22	129.024	14	108.837	75	170.371	0	108.837	35	108.837	26	108.23	15	108.23	70	108.23	29	108.23	948
129.031	10	129.031	5	129.031	40	129.031	101	129.031	0	129.031	0	129.031	0	129.031	38	129.031	0	129.031	0	129.031	16	129.031	14	108.844	105	170.379	0	108.844	44	108.844	34	108.237	19	108.237	40	108.237	53	108.237	812
129.038	14	129.038	25	129.038	22	129.038	68	129.038	0	129.038	0	129.038	0	129.038	32	129.038	0	129.038	1	129.038	24	129.038	26	108.85	77	170.388	3	108.85	45	108.85	23	108.243	37	108.243	31	108.243	36	108.243	709
129.046	1	129.046	19	129.046	19	129.046	70	129.046	2	129.046	0	129.046	1	129.046	19	129.046	0	129.046	0	129.046	17	129.046	8	108.857	92	170.396	23	108.857	49	108.857	30	108.25	45	108.25	29	108.25	19	108.25	617
129.053	0	129.053	18	129.053	13	129.053	47	129.053	0	129.053	0	129.053	0	129.053	17	129.053	0	129.053	0	129.053	25	129.053	13	108.864	92	170.404	11	108.864	81	108.864	32	108.257	18	108.257	42	108.257	43	108.257	515
129.06	1	129.06	16	129.06	8	129.06	40	129.06	0	129.06	0	129.06	0	129.06	15	129.06	0	129.06	3	129.06	12	129.06	7	108.87	82	170.413	6	108.87	97	108.87	49	108.263	11	108.263	28	108.263	49	108.263	473
129.068	1	129.068	13	129.068	2	129.068	31	129.068	0	129.068	0	129.068	0	129.068	10	129.068	0	129.068	0	129.068	23	129.068	13	108.877	100	170.421	1	108.877	55	108.877	73	108.27	49	108.27	44	108.27	30	108.27	447
129.075	2	129.075	10	129.075	2	129.075	12	129.075	1	129.075	0	129.075	0	129.075	2	129.075	0	129.075	7	129.075	14	129.075	1	108.884	91	170.429	1	108.884	37	108.884	94	108.277	21	108.277	29	108.277	41	108.277	401
129.082	0	129.082	5	129.082	9	129.082	17	129.082	7	129.082	0	129.082	0	129.082	4	129.082	0	129.082	1	129.082	12	129.082	1	108.891	71	170.438	0	108.891	18	108.891	73	108.283	12	108.283	32	108.283	38	108.283	319
129.089	0	129.089	2	129.089	3	129.089	16	129.089	0	129.089	0	129.089	0	129.089	5	129.089	0	129.089	0	129.089	22	129.089	5	108.897	98	170.446	2	108.897	13	108.897	98	108.29	5	108.29	35	108.29	44	108.29	312
129.097	0	129.097	0	129.097	5	129.097	8	129.097	0	129.097	0	129.097	0	129.097	3	129.097	0	129.097	0	129.097	4	129.097	0	108.904	71	170.455	3	108.904	6	108.904	56	108.297	0	108.297	32	108.297	55	108.297	313
129.104	0	129.104	1	129.104	3	129.104	6	129.104	0	129.104	0	129.104	0	129.104	3	129.104	0	129.104	0	129.104	9	129.104	10	108.911	56	170.463	0	108.911	16	108.911	48	108.303	0	108.303	16	108.303	46	108.303	307
129.111	0	129.111	1	129.111	1	129.111	9	129.111	0	129.111	0	129.111	0	129.111	1	129.111	0	129.111	0	129.111	9	129.111	5	108.918	47	170.471	0	108.918	10	108.918	49	108.31	0	108.31	9	108.31	30	108.31	288
129.119	0	129.119	3	129.119	2	129.119	8	129.119	0	129.119	0	129.119	0	129.119	1	129.119	0	129.119	0	129.119	4	129.119	0	108.924	65	170.48	0	108.924	4	108.924	27	108.317	0	108.317	9	108.317	42	108.317	259
129.126	0	129.126	4	129.126	9	129.126	4	129.126	0	129.126	0	129.126	0	129.126	2	129.126	0	129.126	0	129.126	2	129.126	3	108.931	60	170.488	0	108.931	10	108.931	61	108.323	0	108.323	30	108.323	82	108.323	219
129.133	0	129.133	7	129.133	5	129.133	5	129.133	0	129.133	0	129.133	0	129.133	1	129.133	0	129.133	0	129.133	4	129.133	1	108.938	75	170.497	0	108.938	34	108.938	38	108.33	0	108.33	23	108.33	54	108.33	244
129.141	0	129.141	1	129.141	2	129.141	6	129.141	0	129.141	0	129.141	0	129.141	4	129.141	0	129.141	0	129.141	5	129.141	10	108.944	75	170.505	0	108.944	73	108.944	29	108.337	0	108.337	30	108.337	25	108.337	213
129.148	2	129.148	0	129.148	4	129.148	4	129.148	0	129.148	0	129.148	0	129.148	7	129.148	0	129.148	0	129.148	0	129.148	4	108.951	57	170.513	2	108.951	42	108.951	26	108.344	0	108.344	33	108.344	16	108.344	178
129.155	1	129.155	8	129.155	0	129.155	0	129.155	2	129.155	0	129.155	0	129.155	0	129.155	0	129.155	0	129.155	5	129.155	2	108.958	64	170.522	13	108.958	27	108.958	12	108.35	0	108.35	23	108.35	14	108.35	173
129.163	0	129.163	13	129.163	3	129.163	13	129.163	0	129.163	0	129.163	0	129.163	0	129.163	0	129.163	0	129.163	5	129.163	9	108.965	92	170.53	27	108.965	14	108.965	0	108.357	0	108.357	13	108.357	17	108.357	194
129.17	0	129.17	6	129.17	5	129.17	7	129.17	0	129.17	0	129.17	0	129.17	5	129.17	0	129.17	0	129.17	14	129.17	6	108.971	87	170.538	26	108.971	31	108.971	11	108.364	0	108.364	45	108.364	38	108.364	148
129.177	0	129.177	2	129.177	25	129.177	9	129.177	0	129.177	0	129.177	0	129.177	11	129.177	0	129.177	0	129.177	10	129.177	1	108.978	73	170.547	12	108.978	35	108.978	45	108.37	0	108.37	28	108.37	22	108.37	104
129.185	0	129.185	1	129.185	12	129.185	12	129.185	0	129.185	0	129.185	0	129.185	12	129.185	0	129.185	0	129.185	7	129.185	0	108.985	49	170.555	7	108.985	11	108.985	27	108.377	0	108.377	25	108.377	33	108.377	89
129.192	0	129.192	2	129.192	2	129.192	10	129.192	0	129.192	0	129.192	0	129.192	14	129.192	0	129.192	0	129.192	5	129.192	2	108.992	57	170.564	0	108.992	15	108.992	5	108.384	0	108.384	26	108.384	37	108.384	109
129.199	0	129.199	2	129.199	4	129.199	23	129.199	0	129.199	0	129.199	0	129.199	6	129.199	0	129.199	0	129.199	9	129.199	3	108.998	82	170.572	0	108.998	35	108.998	38	108.39	0	108.39	9	108.39	20	108.39	105
129.207	0	129.207	4	129.207	3	129.207	14	129.207	0	129.207	0	129.207	0	129.207	2	129.207	0	129.207	0	129.207	15	129.207	0	109.005	108	170.58	0	109.005	18	109.005	88	108.397	0	108.397	6	108.397	14	108.397	77
129.214	0	129.214	4	129.214	6	129.214	11	129.214	0	129.214	0	129.214	0	129.214	2	129.214	0	129.214	0	129.214	14	129.214	4	109.012	120	170.589	0	109.012	6	109.012	44	108.404	1	108.404	2	108.404	19	108.404	39
129.221	0	129.221	2	129.221	3	129.221	19	129.221	0	129.221	0	129.221	0	129.221	1	129.221	0	129.221	0	129.221	9	129.221	4	109.019	90	170.597	0	109.019	1	109.019	22	108.41	7	108.41	0	108.41	14	108.41	31
129.228	0	129.228	6	129.228	8	129.228	17	129.228	0	129.228	0	129.228	0	129.228	5	129.228	0	129.228	0	129.228	10	129.228	2	109.025	58	170.605	0	109.025	9	109.025	21	108.417	2	108.417	12	108.417	18	108.417	21
129.236	0	129.236	13	129.236	2	129.236	11	129.236	0	129.236	0	129.236	0	129.236	15	129.236	0	129.236	0	129.236	8	129.236	1	109.032	48	170.614	6	109.032	28	109.032	24	108.424	0	108.424	27	108.424	35	108.424	32
129.243	0	129.243	4	129.243	6	129.243	11	129.243	0	129.243	0	129.243	0	129.243	7	129.243	0	129.243	0	129.243	9	129.243	2	109.039	66	170.622	17	109.039	5	109.039	20	108.43	0	108.43	10	108.43	92	108.43	20
129.25	0	129.25	2	129.25	8	129.25	9	129.25	0	129.25	0	129.25	0	129.25	4	129.25	0	129.25	0	129.25	10	129.25	0	109.045	69	170.631	4	109.045	3	109.045	12	108.437	0	108.437	45	108.437	59	108.437	23
129.258	0	129.258	0	129.258	2	129.258	12	129.258	0	129.258	0	129.258	0	129.258	4	129.258	0	129.258	0	129.258	6	129.258	0	109.052	55	170.639	18	109.052	1	109.052	9	108.444	3	108.444	38	108.444	51	108.444	36
129.265	0	129.265	0	129.265	1	129.265	14	129.265	0	129.265	0	129.265	0	129.265	3	129.265	0	129.265	0	129.265	0	129.265	0	109.059	58	170.647	7	109.059	0	109.059	1	108.45	0	108.45	21	108.45	76	108.45	11
129.272	0	129.272	1	129.272	2	129.272	19	129.272	0	129.272	0	129.272	0	129.272	3	129.272	0	129.272	0	129.272	3	129.272	2	109.066	48	170.656	0	109.066	6	109.066	7	108.457	8	108.457	14	108.457	43	108.457	9
129.28	0	129.28	0	129.28	3	129.28	11	129.28	0	129.28	0	129.28	0	129.28	1	129.28	0	129.28	0	129.28	0	129.28	1	109.072	51	170.664	0	109.072	26	109.072	29	108.464	0	108.464	10	108.464	24	108.464	3
129.287	0	129.287	0	129.287	5	129.287	7	129.287	0	129.287	0	129.287	0	129.287	0	129.287	0	129.287	0	129.287	0	129.287	1	109.079	51	170.673	0	109.079	49	109.079	33	108.47	0	108.47	19	108.47	22	108.47	9
129.294	0	129.294	1	129.294	1	129.294	8	129.294	0	129.294	0	129.294	0	129.294	3	129.294	0	129.294	0	129.294	2	129.294	1	109.086	37	170.681	9	109.086	30	109.086	12	108.477	0	108.477	10	108.477	36	108.477	42
129.302	0	129.302	8	129.302	0	129.302	10	129.302	0	129.302	0	129.302	0	129.302	1	129.302	0	129.302	0	129.302	1	129.302	0	109.093	54	170.689	3	109.093	11	109.093	18	108.484	0	108.484	9	108.484	35	108.484	32
129.309	0	129.309	0	129.309	0	129.309	4	129.309	0	129.309	0	129.309	0	129.309	1	129.309	0	129.309	0	129.309	1	129.309	2	109.099	73	170.698	0	109.099	12	109.099	13	108.49	0	108.49	37	108.49	64	108.49	16
129.316	0	129.316	0	129.316	0	129.316	6	129.316	0	129.316	0	129.316	0	129.316	1	129.316	0	129.316	0	129.316	2	129.316	5	109.106	55	170.706	14	109.106	5	109.106	17	108.497	0	108.497	43	108.497	41	108.497	11
129.324	0	129.324	4	129.324	5	129.324	2	129.324	0	129.324	0	129.324	0	129.324	3	129.324	0	129.324	0	129.324	5	129.324	0	109.113	31	170.714	13	109.113	9	109.113	7	108.504	0	108.504	14	108.504	27	108.504	26
129.331	0	129.331	2	129.331	3	129.331	1	129.331	0	129.331	0	129.331	0	129.331	2	129.331	0	129.331	0	129.331	4	129.331	5	109.12	35	170.723	5	109.12	36	109.12	8	108.51	0	108.51	7	108.51	23	108.51	21
129.338	0	129.338	5	129.338	0	129.338	0	129.338	0	129.338	0	129.338	0	129.338	9	129.338	0	129.338	0	129.338	6	129.338	1	109.126	63	170.731	5	109.126	23	109.126	17	108.517	0	108.517	38	108.517	21	108.517	14
129.346	0	129.346	1	129.346	0	129.346	1	129.346	0	129.346	0	129.346	0	129.346	6	129.346	0	129.346	0	129.346	1	129.346	4	109.133	67	170.74	0	109.133	27	109.133	27	108.524	0	108.524	20	108.524	39	108.524	18
129.353	0	129.353	0	129.353	0	129.353	1	129.353	0	129.353	0	129.353	0	129.353	1	129.353	0	129.353	0	129.353	1	129.353	0	109.14	47	170.748	0	109.14	11	109.14	18	108.531	0	108.531	3	108.531	41	108.531	14
129.36	0	129.36	0	129.36	1	129.36	4	129.36	0	129.36	0	129.36	0	129.36	0	129.36	0	129.36	5	129.36	1	129.36	0	109.146	40	170.756	0	109.146	10	109.146	43	108.537	0	108.537	12	108.537	28	108.537	26
129.368	0	129.368	0	129.368	4	129.368	0	129.368	0	129.368	0	129.368	0	129.368	0	129.368	0	129.368	7	129.368	0	129.368	3	109.153	42	170.765	0	109.153	8	109.153	86	108.544	0	108.544	28	108.544	25	108.544	13
129.375	0	129.375	0	129.375	5	129.375	1	129.375	0	129.375	0	129.375	0	129.375	1	129.375	0	129.375	0	129.375	0	129.375	1	109.16	82	170.773	0	109.16	5	109.16	42	108.551	1	108.551	57	108.551	29	108.551	7
129.382	0	129.382	0	129.382	4	129.382	0	129.382	0	129.382	0	129.382	0	129.382	5	129.382	0	129.382	0	129.382	0	129.382	1	109.167	75	170.782	0	109.167	19	109.167	40	108.557	0	108.557	44	108.557	37	108.557	9
129.389	0	129.389	0	129.389	0	129.389	0	129.389	0	129.389	0	129.389	0	129.389	5	129.389	0	129.389	0	129.389	3	129.389	1	109.173	48	170.79	0	109.173	29	109.173	57	108.564	31	108.564	19	108.564	36	108.564	12
129.397	0	129.397	0	129.397	4	129.397	0	129.397	0	129.397	0	129.397	0	129.397	0	129.397	0	129.397	0	129.397	13	129.397	1	109.18	28	170.798	0	109.18	22	109.18	24	108.571	30	108.571	16	108.571	33	108.571	3
129.404	0	129.404	1	129.404	8	129.404	1	129.404	0	129.404	0	129.404	0	129.404	0	129.404	0	129.404	0	129.404	18	129.404	3	109.187	49	170.807	0	109.187	12	109.187	44	108.577	11	108.577	20	108.577	14	108.577	22
129.411	0	129.411	0	129.411	1	129.411	0	129.411	0	129.411	0	129.411	0	129.411	6	129.411	0	129.411	0	129.411	2	129.411	4	109.194	55	170.815	0	109.194	36	109.194	41	108.584	6	108.584	36	108.584	12	108.584	33
129.419	0	129.419	0	129.419	0	129.419	1	129.419	0	129.419	0	129.419	0	129.419	7	129.419	0	129.419	0	129.419	0	129.419	4	109.2	34	170.823	0	109.2	52	109.2	13	108.591	7	108.591	39	108.591	55	108.591	17
129.426	0	129.426	0	129.426	0	129.426	0	129.426	0	129.426	0	129.426	0	129.426	3	129.426	0	129.426	0	129.426	2	129.426	4	109.207	45	170.832	0	109.207	75	109.207	10	108.597	0	108.597	33	108.597	53	108.597	8
129.433	0	129.433	0	129.433	0	129.433	4	129.433	0	129.433	0	129.433	0	129.433	7	129.433	0	129.433	0	129.433	11	129.433	3	109.214	59	170.84	0	109.214	26	109.214	12	108.604	5	108.604	49	108.604	62	108.604	6
129.441	0	129.441	0	129.441	0	129.441	1	129.441	0	129.441	0	129.441	0	129.441	1	129.441	0	129.441	0	129.441	5	129.441	0	109.221	66	170.849	0	109.221	6	109.221	15	108.611	4	108.611	18	108.611	62	108.611	8
129.448	0	129.448	0	129.448	0	129.448	1	129.448	0	129.448	0	129.448	0	129.448	0	129.448	0	129.448	0	129.448	3	129.448	1	109.227	98	170.857	0	109.227	57	109.227	14	108.617	1	108.617	15	108.617	70	108.617	6
129.455	0	129.455	0	129.455	0	129.455	1	129.455	0	129.455	0	129.455	0	129.455	0	129.455	0	129.455	0	129.455	7	129.455	1	109.234	89	170.865	0	109.234	46	109.234	27	108.624	0	108.624	8	108.624	60	108.624	57
129.463	0	129.463	0	129.463	0	129.463	0	129.463	0	129.463	0	129.463	0	129.463	0	129.463	0	129.463	0	129.463	0	129.463	4	109.241	71	170.874	0	109.241	15	109.241	45	108.631	0	108.631	3	108.631	53	108.631	32
129.47	0	129.47	0	129.47	1	129.47	8	129.47	0	129.47	0	129.47	0	129.47	1	129.47	0	129.47	0	129.47	6	129.47	5	109.248	73	170.882	0	109.248	7	109.248	35	108.637	0	108.637	4	108.637	74	108.637	14
129.477	0	129.477	0	129.477	0	129.477	5	129.477	0	129.477	0	129.477	0	129.477	3	129.477	0	129.477	0	129.477	3	129.477	0	109.254	69	170.891	0	109.254	8	109.254	13	108.644	0	108.644	7	108.644	96	108.644	9
129.485	0	129.485	2	129.485	1	129.485	11	129.485	0	129.485	0	129.485	0	129.485	0	129.485	0	129.485	0	129.485	4	129.485	0	109.261	58	170.899	6	109.261	14	109.261	17	108.651	0	108.651	2	108.651	57	108.651	2
129.492	0	129.492	0	129.492	4	129.492	6	129.492	0	129.492	0	129.492	0	129.492	0	129.492	0	129.492	0	129.492	3	129.492	1	109.268	34	170.907	3	109.268	2	109.268	48	108.658	0	108.658	5	108.658	33	108.658	9
129.499	0	129.499	0	129.499	1	129.499	0	129.499	0	129.499	0	129.499	0	129.499	6	129.499	0	129.499	0	129.499	10	129.499	8	109.275	56	170.916	6	109.275	11	109.275	51	108.664	0	108.664	14	108.664	44	108.664	3
129.507	0	129.507	0	129.507	2	129.507	1	129.507	0	129.507	0	129.507	0	129.507	3	129.507	0	129.507	0	129.507	12	129.507	5	109.281	34	170.924	0	109.281	6	109.281	26	108.671	1	108.671	17	108.671	41	108.671	6
129.514	0	129.514	2	129.514	0	129.514	3	129.514	0	129.514	0	129.514	0	129.514	0	129.514	0	129.514	0	129.514	5	129.514	2	109.288	40	170.933	12	109.288	15	109.288	30	108.678	1	108.678	3	108.678	59	108.678	27
129.521	0	129.521	0	129.521	4	129.521	10	129.521	0	129.521	0	129.521	0	129.521	0	129.521	0	129.521	0	129.521	1	129.521	7	109.295	22	170.941	3	109.295	36	109.295	61	108.684	2	108.684	2	108.684	55	108.684	13
129.529	0	129.529	0	129.529	0	129.529	5	129.529	0	129.529	0	129.529	0	129.529	0	129.529	0	129.529	0	129.529	0	129.529	4	109.301	30	170.949	1	109.301	35	109.301	30	108.691	6	108.691	16	108.691	51	108.691	1
129.536	0	129.536	4	129.536	0	129.536	2	129.536	0	129.536	0	129.536	0	129.536	0	129.536	0	129.536	0	129.536	0	129.536	3	109.308	82	170.958	0	109.308	29	109.308	9	108.698	1	108.698	14	108.698	66	108.698	34
129.543	0	129.543	1	129.543	2	129.543	0	129.543	0	129.543	0	129.543	0	129.543	5	129.543	0	129.543	0	129.543	0	129.543	2	109.315	87	170.966	0	109.315	38	109.315	3	108.704	0	108.704	35	108.704	64	108.704	36
129.551	0	129.551	1	129.551	8	129.551	6	129.551	0	129.551	0	129.551	0	129.551	2	129.551	0	129.551	0	129.551	0	129.551	0	109.322	41	170.975	12	109.322	13	109.322	12	108.711	0	108.711	22	108.711	43	108.711	17
129.558	0	129.558	5	129.558	2	129.558	0	129.558	0	129.558	0	129.558	0	129.558	2	129.558	0	129.558	0	129.558	0	129.558	0	109.328	38	170.983	17	109.328	10	109.328	2	108.718	0	108.718	2	108.718	39	108.718	8
129.565	0	129.565	0	129.565	4	129.565	2	129.565	0	129.565	0	129.565	0	129.565	5	129.565	0	129.565	0	129.565	5	129.565	1	109.335	66	170.991	5	109.335	19	109.335	0	108.724	0	108.724	12	108.724	59	108.724	7
129.573	0	129.573	0	129.573	0	129.573	2	129.573	0	129.573	0	129.573	0	129.573	0	129.573	0	129.573	0	129.573	0	129.573	2	109.342	59	171	2	109.342	9	109.342	31	108.731	0	108.731	42	108.731	45	108.731	3
129.58	0	129.58	0	129.58	0	129.58	0	129.58	0	129.58	0	129.58	0	129.58	0	129.58	0	129.58	0	129.58	2	129.58	0	109.349	41	171.008	0	109.349	10	109.349	31	108.738	4	108.738	47	108.738	54	108.738	1
129.587	0	129.587	0	129.587	0	129.587	0	129.587	0	129.587	0	129.587	0	129.587	0	129.587	0	129.587	0	129.587	6	129.587	0	109.355	63	171.016	0	109.355	33	109.355	26	108.744	0	108.744	31	108.744	67	108.744	5
129.595	0	129.595	0	129.595	0	129.595	0	129.595	0	129.595	0	129.595	0	129.595	2	129.595	0	129.595	0	129.595	2	129.595	5	109.362	54	171.025	0	109.362	36	109.362	22	108.751	0	108.751	21	108.751	73	108.751	0
129.602	0	129.602	0	129.602	1	129.602	0	129.602	0	129.602	0	129.602	0	129.602	13	129.602	0	129.602	0	129.602	14	129.602	1	109.369	35	171.033	0	109.369	10	109.369	23	108.758	4	108.758	2	108.758	55	108.758	0
129.609	0	129.609	0	129.609	0	129.609	0	129.609	0	129.609	0	129.609	0	129.609	3	129.609	0	129.609	0	129.609	6	129.609	2	109.376	40	171.042	0	109.376	23	109.376	37	108.765	4	108.765	13	108.765	54	108.765	1
129.617	0	129.617	0	129.617	0	129.617	1	129.617	0	129.617	0	129.617	0	129.617	0	129.617	0	129.617	0	129.617	0	129.617	0	109.382	88	171.05	2	109.382	8	109.382	33	108.771	0	108.771	19	108.771	43	108.771	2
129.624	1	129.624	0	129.624	0	129.624	0	129.624	0	129.624	0	129.624	0	129.624	0	129.624	0	129.624	0	129.624	0	129.624	0	109.389	81	171.058	0	109.389	10	109.389	24	108.778	0	108.778	8	108.778	55	108.778	2
129.631	0	129.631	9	129.631	2	129.631	0	129.631	0	129.631	0	129.631	0	129.631	3	129.631	0	129.631	0	129.631	6	129.631	0	109.396	45	171.067	3	109.396	8	109.396	27	108.785	0	108.785	11	108.785	52	108.785	10
129.639	0	129.639	0	129.639	4	129.639	0	129.639	0	129.639	0	129.639	0	129.639	0	129.639	0	129.639	0	129.639	2	129.639	1	109.403	41	171.075	0	109.403	1	109.403	57	108.791	0	108.791	16	108.791	58	108.791	8
129.646	0	129.646	3	129.646	0	129.646	3	129.646	0	129.646	0	129.646	0	129.646	0	129.646	0	129.646	0	129.646	0	129.646	5	109.409	43	171.084	10	109.409	5	109.409	33	108.798	0	108.798	18	108.798	47	108.798	2
129.653	0	129.653	0	129.653	3	129.653	7	129.653	0	129.653	0	129.653	0	129.653	0	129.653	0	129.653	0	129.653	0	129.653	0	109.416	56	171.092	5	109.416	11	109.416	8	108.805	0	108.805	27	108.805	40	108.805	2
129.661	0	129.661	0	129.661	0	129.661	3	129.661	0	129.661	0	129.661	0	129.661	1	129.661	0	129.661	0	129.661	2	129.661	2	109.423	43	171.1	0	109.423	6	109.423	20	108.811	0	108.811	8	108.811	53	108.811	0
129.668	0	129.668	1	129.668	1	129.668	5	129.668	0	129.668	0	129.668	0	129.668	0	129.668	0	129.668	0	129.668	2	129.668	0	109.43	53	171.109	7	109.43	9	109.43	69	108.818	0	108.818	6	108.818	42	108.818	4
129.675	0	129.675	0	129.675	0	129.675	0	129.675	0	129.675	0	129.675	0	129.675	0	129.675	0	129.675	0	129.675	3	129.675	0	109.436	89	171.117	9	109.436	5	109.436	59	108.825	0	108.825	13	108.825	32	108.825	12
129.683	0	129.683	0	129.683	0	129.683	13	129.683	0	129.683	0	129.683	0	129.683	1	129.683	0	129.683	0	129.683	0	129.683	1	109.443	106	171.126	23	109.443	2	109.443	25	108.831	7	108.831	2	108.831	23	108.831	8
129.69	0	129.69	0	129.69	0	129.69	24	129.69	0	129.69	0	129.69	0	129.69	3	129.69	0	129.69	0	129.69	0	129.69	11	109.45	73	171.134	6	109.45	0	109.45	14	108.838	9	108.838	9	108.838	46	108.838	6
129.697	0	129.697	0	129.697	0	129.697	4	129.697	0	129.697	0	129.697	0	129.697	3	129.697	0	129.697	0	129.697	4	129.697	2	109.457	61	171.142	21	109.457	5	109.457	5	108.845	1	108.845	6	108.845	43	108.845	0
129.705	0	129.705	0	129.705	0	129.705	0	129.705	0	129.705	0	129.705	0	129.705	0	129.705	0	129.705	0	129.705	5	129.705	0	109.463	85	171.151	9	109.463	6	109.463	2	108.852	0	108.852	8	108.852	27	108.852	0
129.712	0	129.712	0	129.712	1	129.712	1	129.712	0	129.712	0	129.712	0	129.712	21	129.712	0	129.712	0	129.712	5	129.712	0	109.47	122	171.159	4	109.47	4	109.47	51	108.858	0	108.858	7	108.858	16	108.858	2
129.719	0	129.719	0	129.719	5	129.719	0	129.719	0	129.719	0	129.719	0	129.719	15	129.719	0	129.719	0	129.719	3	129.719	6	109.477	73	171.168	0	109.477	43	109.477	61	108.865	0	108.865	9	108.865	15	108.865	0
129.727	0	129.727	2	129.727	4	129.727	5	129.727	0	129.727	0	129.727	0	129.727	5	129.727	0	129.727	0	129.727	4	129.727	0	109.484	88	171.176	0	109.484	28	109.484	42	108.872	1	108.872	2	108.872	27	108.872	0
129.734	0	129.734	0	129.734	6	129.734	1	129.734	0	129.734	0	129.734	0	129.734	17	129.734	0	129.734	0	129.734	7	129.734	0	109.49	86	171.184	1	109.49	10	109.49	56	108.878	13	108.878	9	108.878	20	108.878	1
129.741	0	129.741	0	129.741	2	129.741	3	129.741	0	129.741	0	129.741	0	129.741	27	129.741	0	129.741	0	129.741	4	129.741	2	109.497	119	171.193	23	109.497	17	109.497	31	108.885	4	108.885	18	108.885	12	108.885	3
129.749	0	129.749	1	129.749	3	129.749	11	129.749	0	129.749	0	129.749	0	129.749	62	129.749	0	129.749	0	129.749	4	129.749	3	109.504	97	171.201	54	109.504	5	109.504	16	108.892	2	108.892	9	108.892	21	108.892	11
129.756	0	129.756	5	129.756	9	129.756	4	129.756	0	129.756	0	129.756	0	129.756	110	129.756	0	129.756	0	129.756	12	129.756	4	109.511	105	171.21	106	109.511	2	109.511	27	108.898	0	108.898	1	108.898	28	108.898	3
129.763	0	129.763	2	129.763	15	129.763	1	129.763	0	129.763	0	129.763	0	129.763	166	129.763	0	129.763	0	129.763	33	129.763	12	109.517	112	171.218	65	109.517	12	109.517	12	108.905	0	108.905	0	108.905	18	108.905	0
129.771	0	129.771	9	129.771	46	129.771	3	129.771	0	129.771	0	129.771	0	129.771	250	129.771	0	129.771	0	129.771	73	129.771	22	109.524	97	171.226	31	109.524	3	109.524	23	108.912	0	108.912	0	108.912	25	108.912	0
129.778	0	129.778	33	129.778	77	129.778	1	129.778	0	129.778	0	129.778	0	129.778	297	129.778	0	129.778	0	129.778	124	129.778	27	109.531	102	171.235	67	109.531	25	109.531	32	108.918	4	108.918	2	108.918	17	108.918	1
129.785	0	129.785	39	129.785	110	129.785	21	129.785	0	129.785	0	129.785	0	129.785	335	129.785	0	129.785	0	129.785	151	129.785	49	109.538	47	171.243	70	109.538	35	109.538	31	108.925	2	108.925	7	108.925	10	108.925	9
129.792	0	129.792	51	129.792	207	129.792	41	129.792	0	129.792	0	129.792	0	129.792	368	129.792	0	129.792	0	129.792	227	129.792	68	109.544	35	171.252	54	109.544	24	109.544	43	108.932	9	108.932	49	108.932	7	108.932	1
129.8	1	129.8	69	129.8	298	129.8	57	129.8	0	129.8	0	129.8	0	129.8	471	129.8	0	129.8	0	129.8	372	129.8	121	109.551	46	171.26	38	109.551	39	109.551	25	108.939	8	108.939	31	108.939	5	108.939	16
129.807	0	129.807	112	129.807	516	129.807	130	129.807	0	129.807	0	129.807	0	129.807	627	129.807	0	129.807	3	129.807	469	129.807	174	109.558	63	171.268	60	109.558	57	109.558	19	108.945	2	108.945	21	108.945	3	108.945	15
129.814	0	129.814	154	129.814	869	129.814	252	129.814	0	129.814	0	129.814	0	129.814	658	129.814	4	129.814	1	129.814	669	129.814	267	109.565	108	171.277	67	109.565	35	109.565	46	108.952	0	108.952	20	108.952	16	108.952	2
129.822	0	129.822	187	129.822	1384	129.822	562	129.822	0	129.822	0	129.822	0	129.822	713	129.822	17	129.822	0	129.822	934	129.822	370	109.571	84	171.285	53	109.571	20	109.571	68	108.959	0	108.959	25	108.959	25	108.959	1
129.829	3	129.829	257	129.829	2052	129.829	938	129.829	6	129.829	0	129.829	0	129.829	805	129.829	49	129.829	0	129.829	1097	129.829	418	109.578	67	171.294	30	109.578	7	109.578	25	108.965	5	108.965	18	108.965	11	108.965	3
129.837	16	129.837	251	129.837	2747	129.837	1355	129.837	3	129.837	0	129.837	0	129.837	898	129.837	85	129.837	0	129.837	949	129.837	471	109.585	78	171.302	24	109.585	19	109.585	14	108.972	34	108.972	8	108.972	26	108.972	2
129.844	41	129.844	276	129.844	3123	129.844	1569	129.844	2	129.844	4	129.844	0	129.844	944	129.844	129	129.844	1	129.844	748	129.844	518	109.592	95	171.31	23	109.592	30	109.592	25	108.979	15	108.979	17	108.979	32	108.979	20
129.851	97	129.851	325	129.851	3172	129.851	1623	129.851	0	129.851	4	129.851	2	129.851	997	129.851	174	129.851	9	129.851	715	129.851	506	109.598	92	171.319	33	109.598	40	109.598	20	108.985	5	108.985	23	108.985	17	108.985	31
129.859	124	129.859	425	129.859	3280	129.859	1498	129.859	2	129.859	1	129.859	17	129.859	875	129.859	198	129.859	17	129.859	653	129.859	393	109.605	59	171.327	26	109.605	28	109.605	48	108.992	12	108.992	14	108.992	19	108.992	11
129.866	192	129.866	474	129.866	3237	129.866	1360	129.866	8	129.866	16	129.866	36	129.866	743	129.866	201	129.866	14	129.866	505	129.866	325	109.612	57	171.336	44	109.612	20	109.612	126	108.999	8	108.999	9	108.999	32	108.999	3
129.873	318	129.873	468	129.873	3099	129.873	1328	129.873	24	129.873	26	129.873	102	129.873	695	129.873	234	129.873	11	129.873	299	129.873	210	109.619	108	171.344	39	109.619	14	109.619	115	109.006	6	109.006	37	109.006	16	109.006	0
129.881	503	129.881	598	129.881	2780	129.881	1211	129.881	46	129.881	38	129.881	248	129.881	656	129.881	245	129.881	7	129.881	148	129.881	96	109.625	69	171.352	23	109.625	11	109.625	96	109.012	6	109.012	31	109.012	9	109.012	1
129.888	568	129.888	623	129.888	2306	129.888	973	129.888	134	129.888	104	129.888	482	129.888	626	129.888	270	129.888	24	129.888	115	129.888	61	109.632	59	171.361	12	109.632	35	109.632	67	109.019	0	109.019	37	109.019	7	109.019	5
129.895	502	129.895	605	129.895	1742	129.895	862	129.895	300	129.895	175	129.895	982	129.895	591	129.895	199	129.895	61	129.895	70	129.895	51	109.639	101	171.369	2	109.639	15	109.639	55	109.026	0	109.026	28	109.026	5	109.026	18
129.903	334	129.903	409	129.903	1389	129.903	659	129.903	609	129.903	152	129.903	1505	129.903	510	129.903	59	129.903	148	129.903	50	129.903	20	109.646	93	171.378	0	109.646	38	109.646	13	109.032	0	109.032	9	109.032	16	109.032	36
129.91	107	129.91	183	129.91	916	129.91	447	129.91	884	129.91	100	129.91	1254	129.91	455	129.91	15	129.91	264	129.91	43	129.91	55	109.652	54	171.386	1	109.652	61	109.652	64	109.039	0	109.039	9	109.039	25	109.039	29
129.917	18	129.917	87	129.917	673	129.917	380	129.917	781	129.917	21	129.917	585	129.917	430	129.917	0	129.917	177	129.917	36	129.917	35	109.659	79	171.394	1	109.659	26	109.659	37	109.046	0	109.046	15	109.046	19	109.046	19
129.925	3	129.925	24	129.925	513	129.925	273	129.925	337	129.925	7	129.925	99	129.925	359	129.925	5	129.925	51	129.925	28	129.925	34	109.666	59	171.403	0	109.666	15	109.666	6	109.052	0	109.052	8	109.052	18	109.052	15
129.932	5	129.932	11	129.932	426	129.932	230	129.932	81	129.932	0	129.932	13	129.932	307	129.932	0	129.932	9	129.932	35	129.932	39	109.673	59	171.411	0	109.673	25	109.673	42	109.059	9	109.059	13	109.059	27	109.059	64
129.939	2	129.939	27	129.939	321	129.939	165	129.939	16	129.939	0	129.939	2	129.939	275	129.939	0	129.939	5	129.939	23	129.939	13	109.679	36	171.42	0	109.679	42	109.679	89	109.066	16	109.066	18	109.066	17	109.066	80
129.947	1	129.947	22	129.947	276	129.947	144	129.947	1	129.947	0	129.947	0	129.947	250	129.947	0	129.947	3	129.947	20	129.947	1	109.686	66	171.428	28	109.686	65	109.686	38	109.073	4	109.073	56	109.073	35	109.073	118
129.954	2	129.954	18	129.954	215	129.954	156	129.954	3	129.954	0	129.954	0	129.954	198	129.954	0	129.954	0	129.954	25	129.954	19	109.693	92	171.436	27	109.693	90	109.693	14	109.079	50	109.079	161	109.079	41	109.079	130
129.961	13	129.961	13	129.961	170	129.961	132	129.961	3	129.961	0	129.961	1	129.961	187	129.961	0	129.961	0	129.961	34	129.961	13	109.7	87	171.445	8	109.7	94	109.7	10	109.086	222	109.086	271	109.086	20	109.086	210
129.969	2	129.969	5	129.969	112	129.969	100	129.969	5	129.969	0	129.969	0	129.969	134	129.969	0	129.969	3	129.969	19	129.969	2	109.706	78	171.453	1	109.706	48	109.706	51	109.093	455	109.093	419	109.093	13	109.093	322
129.976	0	129.976	19	129.976	110	129.976	82	129.976	3	129.976	0	129.976	3	129.976	119	129.976	0	129.976	1	129.976	23	129.976	21	109.713	90	171.462	0	109.713	18	109.713	39	109.099	738	109.099	536	109.099	8	109.099	665
129.983	0	129.983	13	129.983	122	129.983	61	129.983	0	129.983	0	129.983	2	129.983	89	129.983	0	129.983	3	129.983	16	129.983	18	109.72	88	171.47	3	109.72	41	109.72	42	109.106	1265	109.106	907	109.106	7	109.106	1205
129.991	0	129.991	11	129.991	60	129.991	59	129.991	0	129.991	0	129.991	0	129.991	59	129.991	0	129.991	3	129.991	6	129.991	4	109.727	80	171.478	0	109.727	72	109.727	25	109.113	2120	109.113	1193	109.113	4	109.113	2427
129.998	1	129.998	11	129.998	39	129.998	25	129.998	0	129.998	0	129.998	0	129.998	58	129.998	0	129.998	0	129.998	2	129.998	9	109.733	93	171.487	4	109.733	44	109.733	25	109.119	3311	109.119	1462	109.119	7	109.119	4284
130.005	0	130.005	17	130.005	30	130.005	28	130.005	0	130.005	0	130.005	0	130.005	49	130.005	0	130.005	2	130.005	1	130.005	2	109.74	108	171.495	1	109.74	70	109.74	41	109.126	4748	109.126	1865	109.126	19	109.126	7574
130.013	3	130.013	10	130.013	15	130.013	23	130.013	0	130.013	0	130.013	0	130.013	50	130.013	0	130.013	0	130.013	5	130.013	2	109.747	97	171.504	2	109.747	79	109.747	40	109.133	6379	109.133	2478	109.133	31	109.133	11718
130.02	5	130.02	0	130.02	13	130.02	10	130.02	0	130.02	0	130.02	0	130.02	43	130.02	0	130.02	0	130.02	2	130.02	2	109.754	113	171.512	8	109.754	53	109.754	42	109.14	8165	109.14	3420	109.14	38	109.14	16075
130.027	6	130.027	5	130.027	6	130.027	10	130.027	0	130.027	0	130.027	0	130.027	38	130.027	0	130.027	0	130.027	2	130.027	5	109.76	107	171.52	1	109.76	68	109.76	33	109.146	9437	109.146	4308	109.146	29	109.146	20921
130.035	3	130.035	2	130.035	7	130.035	8	130.035	0	130.035	0	130.035	0	130.035	16	130.035	0	130.035	0	130.035	2	130.035	1	109.767	147	171.529	22	109.767	54	109.767	42	109.153	10545	109.153	5501	109.153	25	109.153	24345
130.042	2	130.042	4	130.042	8	130.042	11	130.042	0	130.042	0	130.042	0	130.042	17	130.042	0	130.042	0	130.042	3	130.042	0	109.774	99	171.537	33	109.774	43	109.774	42	109.16	11006	109.16	7381	109.16	32	109.16	27352
130.049	0	130.049	2	130.049	2	130.049	14	130.049	0	130.049	0	130.049	0	130.049	8	130.049	0	130.049	0	130.049	0	130.049	2	109.781	80	171.546	11	109.781	38	109.781	21	109.166	10698	109.166	9765	109.166	45	109.166	27766
130.057	0	130.057	0	130.057	5	130.057	6	130.057	0	130.057	0	130.057	0	130.057	8	130.057	0	130.057	0	130.057	5	130.057	1	109.787	81	171.554	6	109.787	20	109.787	16	109.173	9871	109.173	11991	109.173	40	109.173	27031
130.064	1	130.064	0	130.064	4	130.064	3	130.064	0	130.064	0	130.064	2	130.064	6	130.064	0	130.064	0	130.064	7	130.064	0	109.794	77	171.562	1	109.794	36	109.794	2	109.18	8970	109.18	12880	109.18	58	109.18	24784
130.071	0	130.071	0	130.071	2	130.071	0	130.071	0	130.071	0	130.071	0	130.071	2	130.071	0	130.071	0	130.071	1	130.071	2	109.801	88	171.571	9	109.801	81	109.801	53	109.186	7903	109.186	12641	109.186	62	109.186	22994
130.079	0	130.079	0	130.079	0	130.079	0	130.079	9	130.079	0	130.079	0	130.079	2	130.079	0	130.079	0	130.079	7	130.079	1	109.808	72	171.579	10	109.808	61	109.808	63	109.193	6070	109.193	11062	109.193	73	109.193	20445
130.086	0	130.086	3	130.086	0	130.086	6	130.086	3	130.086	0	130.086	0	130.086	2	130.086	0	130.086	0	130.086	0	130.086	1	109.814	77	171.588	1	109.814	46	109.814	66	109.2	4447	109.2	8631	109.2	81	109.2	17705
130.093	0	130.093	11	130.093	2	130.093	0	130.093	0	130.093	0	130.093	1	130.093	1	130.093	0	130.093	0	130.093	1	130.093	1	109.821	125	171.596	0	109.821	66	109.821	51	109.207	3346	109.207	5891	109.207	69	109.207	15446
130.101	0	130.101	0	130.101	7	130.101	1	130.101	0	130.101	0	130.101	0	130.101	6	130.101	0	130.101	0	130.101	0	130.101	1	109.828	102	171.604	6	109.828	26	109.828	93	109.213	2318	109.213	4204	109.213	43	109.213	13295
130.108	0	130.108	0	130.108	1	130.108	3	130.108	0	130.108	0	130.108	0	130.108	6	130.108	0	130.108	0	130.108	7	130.108	1	109.835	122	171.613	1	109.835	7	109.835	132	109.22	1365	109.22	2952	109.22	25	109.22	10820
130.115	0	130.115	0	130.115	0	130.115	0	130.115	0	130.115	0	130.115	0	130.115	8	130.115	0	130.115	0	130.115	0	130.115	0	109.842	83	171.621	5	109.842	8	109.842	142	109.227	753	109.227	2086	109.227	11	109.227	8540
130.123	0	130.123	0	130.123	1	130.123	0	130.123	0	130.123	0	130.123	0	130.123	2	130.123	0	130.123	0	130.123	2	130.123	0	109.848	64	171.63	3	109.848	0	109.848	137	109.233	364	109.233	1442	109.233	13	109.233	7005
130.13	0	130.13	0	130.13	0	130.13	0	130.13	0	130.13	0	130.13	0	130.13	10	130.13	0	130.13	0	130.13	5	130.13	0	109.855	60	171.638	1	109.855	3	109.855	72	109.24	217	109.24	1082	109.24	50	109.24	5950
130.137	0	130.137	1	130.137	0	130.137	0	130.137	0	130.137	0	130.137	0	130.137	6	130.137	0	130.137	0	130.137	3	130.137	0	109.862	64	171.647	0	109.862	6	109.862	102	109.247	152	109.247	747	109.247	64	109.247	5044
130.145	0	130.145	0	130.145	3	130.145	0	130.145	0	130.145	0	130.145	0	130.145	0	130.145	0	130.145	0	130.145	0	130.145	5	109.869	99	171.655	13	109.869	16	109.869	108	109.253	119	109.253	601	109.253	35	109.253	4418
130.152	0	130.152	2	130.152	1	130.152	0	130.152	0	130.152	0	130.152	0	130.152	5	130.152	0	130.152	2	130.152	1	130.152	2	109.875	104	171.663	6	109.875	5	109.875	73	109.26	74	109.26	495	109.26	26	109.26	3805
130.159	0	130.159	2	130.159	0	130.159	0	130.159	0	130.159	0	130.159	0	130.159	2	130.159	0	130.159	0	130.159	1	130.159	1	109.882	63	171.672	22	109.882	20	109.882	53	109.267	60	109.267	351	109.267	23	109.267	3424
130.167	0	130.167	1	130.167	0	130.167	0	130.167	0	130.167	0	130.167	0	130.167	6	130.167	0	130.167	0	130.167	10	130.167	2	109.889	54	171.68	41	109.889	17	109.889	110	109.274	45	109.274	250	109.274	12	109.274	3064
130.174	0	130.174	0	130.174	5	130.174	0	130.174	0	130.174	0	130.174	0	130.174	12	130.174	0	130.174	0	130.174	0	130.174	2	109.896	61	171.689	32	109.896	12	109.896	110	109.28	40	109.28	217	109.28	10	109.28	2758
130.181	0	130.181	0	130.181	1	130.181	0	130.181	0	130.181	0	130.181	0	130.181	3	130.181	0	130.181	0	130.181	1	130.181	1	109.902	89	171.697	43	109.902	15	109.902	111	109.287	34	109.287	265	109.287	15	109.287	2537
130.189	0	130.189	3	130.189	0	130.189	1	130.189	0	130.189	0	130.189	0	130.189	2	130.189	0	130.189	0	130.189	4	130.189	1	109.909	60	171.705	13	109.909	12	109.909	134	109.294	17	109.294	230	109.294	7	109.294	2339
130.196	0	130.196	1	130.196	1	130.196	0	130.196	0	130.196	0	130.196	0	130.196	5	130.196	0	130.196	0	130.196	2	130.196	1	109.916	56	171.714	5	109.916	28	109.916	89	109.3	34	109.3	182	109.3	6	109.3	2214
130.203	0	130.203	4	130.203	0	130.203	2	130.203	0	130.203	0	130.203	0	130.203	2	130.203	0	130.203	0	130.203	1	130.203	1	109.923	80	171.722	2	109.923	36	109.923	89	109.307	40	109.307	108	109.307	15	109.307	2099
130.211	0	130.211	1	130.211	5	130.211	3	130.211	0	130.211	0	130.211	0	130.211	9	130.211	0	130.211	2	130.211	0	130.211	5	109.929	88	171.731	0	109.929	17	109.929	74	109.314	25	109.314	128	109.314	23	109.314	1925
130.218	0	130.218	2	130.218	2	130.218	0	130.218	0	130.218	0	130.218	0	130.218	7	130.218	0	130.218	0	130.218	0	130.218	0	109.936	62	171.739	0	109.936	16	109.936	111	109.321	17	109.321	105	109.321	7	109.321	1752
130.226	0	130.226	0	130.226	0	130.226	13	130.226	0	130.226	0	130.226	0	130.226	4	130.226	0	130.226	0	130.226	9	130.226	0	109.943	77	171.747	0	109.943	6	109.943	95	109.327	27	109.327	67	109.327	9	109.327	1626
130.233	0	130.233	1	130.233	0	130.233	3	130.233	0	130.233	0	130.233	0	130.233	0	130.233	0	130.233	0	130.233	3	130.233	1	109.95	49	171.756	0	109.95	0	109.95	67	109.334	29	109.334	89	109.334	28	109.334	1487
130.24	0	130.24	0	130.24	3	130.24	4	130.24	0	130.24	0	130.24	0	130.24	1	130.24	0	130.24	0	130.24	0	130.24	3	109.956	56	171.764	0	109.956	7	109.956	63	109.341	26	109.341	156	109.341	16	109.341	1401
130.248	0	130.248	1	130.248	0	130.248	10	130.248	0	130.248	0	130.248	0	130.248	0	130.248	0	130.248	0	130.248	1	130.248	10	109.963	75	171.773	0	109.963	0	109.963	45	109.347	15	109.347	107	109.347	12	109.347	1301
130.255	1	130.255	0	130.255	0	130.255	11	130.255	0	130.255	0	130.255	0	130.255	5	130.255	0	130.255	0	130.255	2	130.255	7	109.97	77	171.781	0	109.97	21	109.97	15	109.354	23	109.354	133	109.354	14	109.354	1222
130.262	0	130.262	1	130.262	2	130.262	3	130.262	0	130.262	0	130.262	0	130.262	5	130.262	0	130.262	0	130.262	1	130.262	1	109.977	71	171.789	0	109.977	65	109.977	15	109.361	30	109.361	78	109.361	15	109.361	1157
130.27	0	130.27	0	130.27	0	130.27	2	130.27	0	130.27	0	130.27	0	130.27	9	130.27	0	130.27	0	130.27	6	130.27	0	109.984	87	171.798	0	109.984	36	109.984	11	109.368	43	109.368	78	109.368	26	109.368	1087
130.277	0	130.277	0	130.277	0	130.277	1	130.277	0	130.277	0	130.277	0	130.277	1	130.277	0	130.277	0	130.277	6	130.277	2	109.99	86	171.806	3	109.99	20	109.99	5	109.374	50	109.374	88	109.374	14	109.374	983
130.284	0	130.284	0	130.284	0	130.284	1	130.284	0	130.284	0	130.284	0	130.284	0	130.284	0	130.284	0	130.284	3	130.284	3	109.997	79	171.815	0	109.997	21	109.997	1	109.381	52	109.381	57	109.381	7	109.381	829
130.292	0	130.292	1	130.292	3	130.292	0	130.292	0	130.292	0	130.292	0	130.292	3	130.292	0	130.292	0	130.292	0	130.292	2	110.004	93	171.823	0	110.004	18	110.004	19	109.388	59	109.388	48	109.388	4	109.388	698
130.299	0	130.299	0	130.299	8	130.299	0	130.299	0	130.299	0	130.299	0	130.299	0	130.299	0	130.299	0	130.299	5	130.299	7	110.011	74	171.832	0	110.011	28	110.011	10	109.394	85	109.394	73	109.394	3	109.394	639
130.306	0	130.306	0	130.306	1	130.306	0	130.306	0	130.306	0	130.306	0	130.306	0	130.306	0	130.306	0	130.306	3	130.306	0	110.017	36	171.84	0	110.017	14	110.017	9	109.401	86	109.401	61	109.401	2	109.401	607
130.314	0	130.314	0	130.314	0	130.314	3	130.314	0	130.314	0	130.314	0	130.314	0	130.314	0	130.314	0	130.314	2	130.314	2	110.024	83	171.848	4	110.024	1	110.024	30	109.408	99	109.408	83	109.408	0	109.408	665
130.321	0	130.321	0	130.321	0	130.321	4	130.321	0	130.321	0	130.321	0	130.321	0	130.321	0	130.321	0	130.321	2	130.321	0	110.031	157	171.857	0	110.031	33	110.031	34	109.414	120	109.414	106	109.414	2	109.414	740
130.328	0	130.328	0	130.328	0	130.328	4	130.328	0	130.328	0	130.328	0	130.328	0	130.328	0	130.328	0	130.328	1	130.328	4	110.038	102	171.865	0	110.038	36	110.038	21	109.421	111	109.421	151	109.421	3	109.421	851
130.336	0	130.336	7	130.336	0	130.336	0	130.336	0	130.336	0	130.336	0	130.336	0	130.336	0	130.336	0	130.336	9	130.336	3	110.044	54	171.874	0	110.044	38	110.044	23	109.428	70	109.428	153	109.428	14	109.428	958
130.343	0	130.343	5	130.343	0	130.343	0	130.343	0	130.343	0	130.343	0	130.343	0	130.343	0	130.343	1	130.343	3	130.343	0	110.051	54	171.882	0	110.051	34	110.051	28	109.435	41	109.435	170	109.435	11	109.435	957
130.35	0	130.35	1	130.35	5	130.35	6	130.35	0	130.35	0	130.35	0	130.35	0	130.35	0	130.35	0	130.35	2	130.35	0	110.058	110	171.89	0	110.058	27	110.058	33	109.441	26	109.441	213	109.441	11	109.441	964
130.358	1	130.358	0	130.358	0	130.358	0	130.358	0	130.358	0	130.358	0	130.358	1	130.358	0	130.358	0	130.358	13	130.358	0	110.065	73	171.899	0	110.065	12	110.065	60	109.448	8	109.448	207	109.448	6	109.448	943
130.365	0	130.365	0	130.365	0	130.365	0	130.365	0	130.365	0	130.365	0	130.365	0	130.365	0	130.365	0	130.365	3	130.365	1	110.071	37	171.907	0	110.071	10	110.071	115	109.455	4	109.455	188	109.455	4	109.455	968
130.372	1	130.372	0	130.372	0	130.372	0	130.372	0	130.372	0	130.372	0	130.372	0	130.372	0	130.372	0	130.372	1	130.372	1	110.078	45	171.916	0	110.078	4	110.078	62	109.461	2	109.461	205	109.461	3	109.461	893
130.38	0	130.38	0	130.38	0	130.38	0	130.38	0	130.38	0	130.38	3	130.38	6	130.38	0	130.38	0	130.38	0	130.38	2	110.085	106	171.924	0	110.085	10	110.085	36	109.468	2	109.468	124	109.468	8	109.468	732
130.387	0	130.387	0	130.387	5	130.387	1	130.387	0	130.387	0	130.387	0	130.387	0	130.387	0	130.387	0	130.387	0	130.387	2	110.092	74	171.933	0	110.092	11	110.092	21	109.475	0	109.475	72	109.475	15	109.475	561
130.395	0	130.395	0	130.395	1	130.395	0	130.395	0	130.395	0	130.395	0	130.395	0	130.395	0	130.395	0	130.395	0	130.395	1	110.099	63	171.941	0	110.099	2	110.099	25	109.482	11	109.482	65	109.482	7	109.482	469
130.402	0	130.402	1	130.402	5	130.402	5	130.402	0	130.402	0	130.402	0	130.402	6	130.402	0	130.402	0	130.402	5	130.402	1	110.105	66	171.949	0	110.105	15	110.105	27	109.488	23	109.488	57	109.488	5	109.488	407
130.409	0	130.409	4	130.409	1	130.409	9	130.409	0	130.409	0	130.409	0	130.409	16	130.409	0	130.409	0	130.409	5	130.409	2	110.112	41	171.958	0	110.112	30	110.112	13	109.495	50	109.495	56	109.495	2	109.495	351
130.417	0	130.417	0	130.417	0	130.417	1	130.417	0	130.417	0	130.417	0	130.417	15	130.417	0	130.417	0	130.417	2	130.417	3	110.119	45	171.966	0	110.119	26	110.119	46	109.502	47	109.502	46	109.502	2	109.502	302
130.424	0	130.424	1	130.424	1	130.424	8	130.424	0	130.424	0	130.424	0	130.424	3	130.424	0	130.424	0	130.424	0	130.424	0	110.126	42	171.975	17	110.126	4	110.126	90	109.508	35	109.508	71	109.508	0	109.508	255
130.431	0	130.431	1	130.431	1	130.431	7	130.431	0	130.431	0	130.431	0	130.431	2	130.431	0	130.431	0	130.431	6	130.431	2	110.132	41	171.983	14	110.132	1	110.132	48	109.515	15	109.515	61	109.515	1	109.515	215
130.439	0	130.439	0	130.439	0	130.439	2	130.439	0	130.439	0	130.439	0	130.439	0	130.439	0	130.439	0	130.439	1	130.439	1	110.139	52	171.991	2	110.139	0	110.139	15	109.522	12	109.522	41	109.522	0	109.522	187
130.446	0	130.446	0	130.446	0	130.446	8	130.446	0	130.446	0	130.446	0	130.446	0	130.446	0	130.446	0	130.446	3	130.446	0	110.146	56	172	1	110.146	0	110.146	14	109.529	7	109.529	37	109.529	0	109.529	177
130.453	0	130.453	0	130.453	13	130.453	3	130.453	0	130.453	0	130.453	0	130.453	5	130.453	0	130.453	0	130.453	1	130.453	8	110.153	72	172.008	0	110.153	0	110.153	49	109.535	9	109.535	30	109.535	0	109.535	180
130.461	0	130.461	1	130.461	12	130.461	1	130.461	0	130.461	0	130.461	0	130.461	6	130.461	0	130.461	0	130.461	0	130.461	3	110.159	75	172.017	0	110.159	0	110.159	39	109.542	6	109.542	36	109.542	1	109.542	167
130.468	0	130.468	3	130.468	3	130.468	0	130.468	0	130.468	0	130.468	0	130.468	0	130.468	0	130.468	0	130.468	8	130.468	0	110.166	70	172.025	0	110.166	0	110.166	25	109.549	1	109.549	52	109.549	0	109.549	157
130.475	0	130.475	2	130.475	0	130.475	0	130.475	0	130.475	0	130.475	0	130.475	0	130.475	0	130.475	0	130.475	2	130.475	4	110.173	53	172.034	0	110.173	0	110.173	31	109.555	0	109.555	41	109.555	0	109.555	160
130.483	0	130.483	0	130.483	1	130.483	0	130.483	0	130.483	0	130.483	0	130.483	0	130.483	1	130.483	0	130.483	3	130.483	2	110.18	84	172.042	0	110.18	11	110.18	43	109.562	0	109.562	22	109.562	0	109.562	153
130.49	0	130.49	1	130.49	2	130.49	0	130.49	0	130.49	0	130.49	0	130.49	4	130.49	0	130.49	0	130.49	0	130.49	3	110.186	106	172.05	6	110.186	16	110.186	34	109.569	0	109.569	39	109.569	2	109.569	167
130.497	0	130.497	2	130.497	0	130.497	0	130.497	0	130.497	0	130.497	0	130.497	1	130.497	0	130.497	0	130.497	10	130.497	7	110.193	99	172.059	1	110.193	6	110.193	29	109.576	0	109.576	19	109.576	5	109.576	192
130.505	0	130.505	3	130.505	10	130.505	1	130.505	0	130.505	0	130.505	0	130.505	3	130.505	0	130.505	0	130.505	3	130.505	16	110.2	78	172.067	0	110.2	3	110.2	10	109.582	1	109.582	17	109.582	1	109.582	196
130.512	0	130.512	8	130.512	7	130.512	0	130.512	0	130.512	0	130.512	0	130.512	6	130.512	0	130.512	0	130.512	1	130.512	2	110.207	122	172.076	1	110.207	18	110.207	28	109.589	0	109.589	25	109.589	8	109.589	168
130.519	0	130.519	9	130.519	1	130.519	0	130.519	0	130.519	0	130.519	0	130.519	2	130.519	0	130.519	0	130.519	0	130.519	3	110.214	133	172.084	4	110.214	60	110.214	34	109.596	5	109.596	27	109.596	1	109.596	165
130.527	0	130.527	0	130.527	0	130.527	1	130.527	0	130.527	0	130.527	0	130.527	0	130.527	0	130.527	0	130.527	0	130.527	3	110.22	108	172.092	7	110.22	16	110.22	23	109.602	8	109.602	50	109.602	0	109.602	139
130.534	0	130.534	0	130.534	0	130.534	1	130.534	0	130.534	0	130.534	0	130.534	0	130.534	0	130.534	0	130.534	1	130.534	1	110.227	99	172.101	0	110.227	25	110.227	32	109.609	0	109.609	60	109.609	1	109.609	120
130.542	0	130.542	2	130.542	0	130.542	0	130.542	0	130.542	0	130.542	0	130.542	1	130.542	0	130.542	0	130.542	5	130.542	4	110.234	101	172.109	0	110.234	39	110.234	73	109.616	0	109.616	27	109.616	0	109.616	97
130.549	0	130.549	5	130.549	1	130.549	0	130.549	0	130.549	0	130.549	0	130.549	0	130.549	0	130.549	0	130.549	1	130.549	3	110.241	79	172.118	1	110.241	14	110.241	33	109.623	1	109.623	38	109.623	0	109.623	70
130.556	0	130.556	2	130.556	0	130.556	0	130.556	0	130.556	0	130.556	0	130.556	3	130.556	0	130.556	0	130.556	5	130.556	4	110.247	66	172.126	19	110.247	14	110.247	10	109.629	7	109.629	73	109.629	8	109.629	56
130.564	0	130.564	4	130.564	0	130.564	5	130.564	0	130.564	0	130.564	0	130.564	0	130.564	0	130.564	0	130.564	3	130.564	0	110.254	81	172.135	5	110.254	6	110.254	20	109.636	1	109.636	23	109.636	8	109.636	33
130.571	0	130.571	16	130.571	2	130.571	2	130.571	0	130.571	0	130.571	0	130.571	0	130.571	0	130.571	0	130.571	1	130.571	0	110.261	66	172.143	5	110.261	9	110.261	19	109.643	4	109.643	15	109.643	2	109.643	22
130.578	0	130.578	1	130.578	3	130.578	0	130.578	0	130.578	0	130.578	0	130.578	1	130.578	0	130.578	0	130.578	4	130.578	0	110.268	73	172.151	0	110.268	8	110.268	7	109.649	2	109.649	13	109.649	7	109.649	29
130.586	0	130.586	3	130.586	0	130.586	0	130.586	0	130.586	0	130.586	0	130.586	1	130.586	0	130.586	0	130.586	1	130.586	3	110.275	63	172.16	1	110.275	3	110.275	8	109.656	5	109.656	36	109.656	2	109.656	34
130.593	0	130.593	1	130.593	4	130.593	0	130.593	0	130.593	0	130.593	0	130.593	0	130.593	0	130.593	0	130.593	0	130.593	3	110.281	60	172.168	7	110.281	1	110.281	20	109.663	6	109.663	48	109.663	0	109.663	77
130.6	4	130.6	2	130.6	0	130.6	4	130.6	0	130.6	0	130.6	0	130.6	6	130.6	0	130.6	0	130.6	2	130.6	0	110.288	44	172.177	6	110.288	2	110.288	37	109.67	17	109.67	45	109.67	5	109.67	109
130.608	2	130.608	0	130.608	0	130.608	5	130.608	0	130.608	0	130.608	0	130.608	5	130.608	0	130.608	0	130.608	0	130.608	1	110.295	84	172.185	6	110.295	9	110.295	11	109.676	9	109.676	64	109.676	6	109.676	122
130.615	0	130.615	2	130.615	0	130.615	9	130.615	0	130.615	0	130.615	0	130.615	5	130.615	0	130.615	0	130.615	1	130.615	2	110.302	62	172.194	1	110.302	19	110.302	7	109.683	2	109.683	43	109.683	21	109.683	134
130.622	0	130.622	0	130.622	0	130.622	5	130.622	0	130.622	0	130.622	0	130.622	8	130.622	0	130.622	0	130.622	4	130.622	0	110.308	49	172.202	5	110.308	33	110.308	29	109.69	1	109.69	29	109.69	50	109.69	114
130.63	0	130.63	3	130.63	0	130.63	0	130.63	0	130.63	0	130.63	0	130.63	8	130.63	0	130.63	0	130.63	0	130.63	0	110.315	83	172.21	3	110.315	22	110.315	11	109.696	6	109.696	21	109.696	55	109.696	91
130.637	0	130.637	0	130.637	7	130.637	0	130.637	0	130.637	0	130.637	0	130.637	6	130.637	0	130.637	0	130.637	2	130.637	1	110.322	85	172.219	22	110.322	28	110.322	0	109.703	9	109.703	22	109.703	38	109.703	92
130.645	0	130.645	0	130.645	5	130.645	3	130.645	0	130.645	0	130.645	0	130.645	1	130.645	0	130.645	0	130.645	3	130.645	3	110.329	70	172.227	18	110.329	22	110.329	5	109.71	6	109.71	4	109.71	13	109.71	91
130.652	0	130.652	0	130.652	7	130.652	1	130.652	0	130.652	0	130.652	0	130.652	0	130.652	0	130.652	0	130.652	6	130.652	0	110.335	42	172.236	21	110.335	20	110.335	0	109.717	0	109.717	2	109.717	13	109.717	78
130.659	0	130.659	1	130.659	16	130.659	0	130.659	0	130.659	0	130.659	0	130.659	1	130.659	0	130.659	0	130.659	0	130.659	3	110.342	34	172.244	33	110.342	16	110.342	7	109.723	12	109.723	18	109.723	28	109.723	65
130.667	0	130.667	1	130.667	3	130.667	2	130.667	0	130.667	0	130.667	0	130.667	2	130.667	0	130.667	0	130.667	2	130.667	0	110.349	46	172.252	28	110.349	3	110.349	42	109.73	14	109.73	37	109.73	22	109.73	60
130.674	0	130.674	2	130.674	1	130.674	1	130.674	0	130.674	0	130.674	0	130.674	0	130.674	0	130.674	0	130.674	10	130.674	1	110.356	27	172.261	34	110.356	3	110.356	25	109.737	3	109.737	49	109.737	18	109.737	47
130.681	0	130.681	5	130.681	0	130.681	0	130.681	0	130.681	0	130.681	0	130.681	2	130.681	0	130.681	0	130.681	8	130.681	4	110.363	37	172.269	61	110.363	2	110.363	22	109.744	0	109.744	65	109.744	14	109.744	71
130.689	0	130.689	3	130.689	0	130.689	3	130.689	0	130.689	0	130.689	0	130.689	0	130.689	0	130.689	0	130.689	0	130.689	7	110.369	36	172.278	83	110.369	12	110.369	42	109.75	5	109.75	57	109.75	5	109.75	65
130.696	0	130.696	0	130.696	3	130.696	0	130.696	0	130.696	0	130.696	0	130.696	1	130.696	0	130.696	0	130.696	2	130.696	9	110.376	74	172.286	47	110.376	5	110.376	39	109.757	3	109.757	36	109.757	3	109.757	54
130.703	0	130.703	1	130.703	0	130.703	1	130.703	0	130.703	0	130.703	0	130.703	3	130.703	0	130.703	0	130.703	8	130.703	7	110.383	52	172.295	31	110.383	0	110.383	33	109.764	0	109.764	61	109.764	5	109.764	64
130.711	0	130.711	0	130.711	5	130.711	1	130.711	0	130.711	0	130.711	0	130.711	0	130.711	0	130.711	0	130.711	9	130.711	1	110.39	59	172.303	26	110.39	40	110.39	21	109.77	0	109.77	55	109.77	0	109.77	77
130.718	0	130.718	1	130.718	5	130.718	12	130.718	0	130.718	0	130.718	0	130.718	0	130.718	0	130.718	0	130.718	1	130.718	2	110.396	68	172.311	28	110.396	41	110.396	67	109.777	10	109.777	40	109.777	0	109.777	56
130.725	0	130.725	1	130.725	0	130.725	4	130.725	0	130.725	0	130.725	0	130.725	0	130.725	0	130.725	0	130.725	2	130.725	2	110.403	72	172.32	31	110.403	19	110.403	61	109.784	18	109.784	28	109.784	6	109.784	51
130.733	2	130.733	0	130.733	0	130.733	0	130.733	0	130.733	0	130.733	0	130.733	0	130.733	0	130.733	0	130.733	0	130.733	0	110.41	88	172.328	14	110.41	11	110.41	28	109.791	13	109.791	31	109.791	2	109.791	51
130.74	0	130.74	0	130.74	0	130.74	3	130.74	0	130.74	0	130.74	0	130.74	1	130.74	0	130.74	0	130.74	2	130.74	0	110.417	51	172.337	5	110.417	12	110.417	24	109.797	20	109.797	35	109.797	0	109.797	59
130.748	0	130.748	0	130.748	0	130.748	2	130.748	0	130.748	0	130.748	0	130.748	4	130.748	0	130.748	0	130.748	2	130.748	0	110.424	49	172.345	2	110.424	28	110.424	21	109.804	40	109.804	32	109.804	6	109.804	74
130.755	0	130.755	0	130.755	1	130.755	2	130.755	0	130.755	0	130.755	0	130.755	16	130.755	0	130.755	0	130.755	0	130.755	1	110.43	52	172.354	4	110.43	14	110.43	20	109.811	19	109.811	36	109.811	7	109.811	68
130.762	0	130.762	0	130.762	0	130.762	0	130.762	0	130.762	0	130.762	0	130.762	12	130.762	0	130.762	0	130.762	10	130.762	0	110.437	39	172.362	9	110.437	8	110.437	35	109.817	13	109.817	19	109.817	0	109.817	62
130.77	1	130.77	2	130.77	3	130.77	0	130.77	0	130.77	0	130.77	0	130.77	23	130.77	0	130.77	0	130.77	11	130.77	2	110.444	26	172.37	5	110.444	4	110.444	38	109.824	3	109.824	18	109.824	0	109.824	74
130.777	1	130.777	2	130.777	7	130.777	0	130.777	0	130.777	0	130.777	0	130.777	21	130.777	0	130.777	0	130.777	4	130.777	0	110.451	60	172.379	15	110.451	0	110.451	19	109.831	5	109.831	28	109.831	0	109.831	56
130.784	0	130.784	0	130.784	2	130.784	0	130.784	0	130.784	0	130.784	0	130.784	16	130.784	0	130.784	0	130.784	4	130.784	10	110.457	50	172.387	10	110.457	0	110.457	8	109.838	0	109.838	22	109.838	0	109.838	66
130.792	0	130.792	0	130.792	1	130.792	0	130.792	0	130.792	0	130.792	0	130.792	25	130.792	0	130.792	0	130.792	0	130.792	2	110.464	60	172.396	3	110.464	2	110.464	19	109.844	0	109.844	23	109.844	0	109.844	56
130.799	0	130.799	1	130.799	0	130.799	4	130.799	0	130.799	0	130.799	0	130.799	45	130.799	0	130.799	0	130.799	0	130.799	0	110.471	68	172.404	0	110.471	3	110.471	9	109.851	0	109.851	31	109.851	0	109.851	43
130.806	0	130.806	0	130.806	2	130.806	5	130.806	0	130.806	0	130.806	0	130.806	72	130.806	0	130.806	0	130.806	4	130.806	9	110.478	107	172.413	0	110.478	0	110.478	11	109.858	0	109.858	21	109.858	0	109.858	39
130.814	3	130.814	0	130.814	3	130.814	6	130.814	0	130.814	0	130.814	0	130.814	71	130.814	0	130.814	0	130.814	4	130.814	6	110.485	90	172.421	0	110.485	7	110.485	26	109.865	1	109.865	27	109.865	0	109.865	40
130.821	1	130.821	0	130.821	15	130.821	4	130.821	1	130.821	0	130.821	0	130.821	109	130.821	0	130.821	0	130.821	5	130.821	1	110.491	100	172.429	0	110.491	19	110.491	66	109.871	0	109.871	46	109.871	0	109.871	22
130.829	0	130.829	1	130.829	8	130.829	4	130.829	0	130.829	0	130.829	0	130.829	111	130.829	0	130.829	0	130.829	8	130.829	7	110.498	83	172.438	0	110.498	14	110.498	56	109.878	0	109.878	29	109.878	20	109.878	23
130.836	1	130.836	4	130.836	16	130.836	12	130.836	0	130.836	0	130.836	1	130.836	154	130.836	0	130.836	0	130.836	9	130.836	7	110.505	49	172.446	0	110.505	3	110.505	25	109.885	7	109.885	30	109.885	17	109.885	27
130.843	0	130.843	3	130.843	27	130.843	9	130.843	0	130.843	0	130.843	0	130.843	208	130.843	0	130.843	0	130.843	5	130.843	3	110.512	62	172.455	0	110.512	0	110.512	37	109.891	2	109.891	44	109.891	19	109.891	27
130.851	0	130.851	0	130.851	36	130.851	8	130.851	0	130.851	0	130.851	0	130.851	253	130.851	0	130.851	0	130.851	6	130.851	8	110.518	71	172.463	0	110.518	0	110.518	19	109.898	6	109.898	55	109.898	22	109.898	27
130.858	4	130.858	0	130.858	46	130.858	9	130.858	0	130.858	0	130.858	0	130.858	254	130.858	0	130.858	0	130.858	12	130.858	10	110.525	55	172.472	3	110.525	10	110.525	24	109.905	16	109.905	23	109.905	9	109.905	24
130.865	6	130.865	0	130.865	79	130.865	38	130.865	0	130.865	0	130.865	0	130.865	238	130.865	0	130.865	0	130.865	26	130.865	20	110.532	40	172.48	0	110.532	25	110.532	31	109.912	5	109.912	15	109.912	13	109.912	32
130.873	0	130.873	3	130.873	83	130.873	58	130.873	0	130.873	0	130.873	0	130.873	222	130.873	0	130.873	0	130.873	26	130.873	31	110.539	74	172.488	0	110.539	9	110.539	39	109.918	5	109.918	10	109.918	30	109.918	38
130.88	2	130.88	7	130.88	104	130.88	50	130.88	0	130.88	0	130.88	0	130.88	272	130.88	0	130.88	0	130.88	52	130.88	16	110.546	72	172.497	0	110.546	11	110.546	23	109.925	0	109.925	29	109.925	23	109.925	40
130.887	0	130.887	6	130.887	144	130.887	45	130.887	0	130.887	0	130.887	0	130.887	309	130.887	0	130.887	0	130.887	66	130.887	19	110.552	69	172.505	0	110.552	11	110.552	22	109.932	0	109.932	12	109.932	11	109.932	28
130.895	0	130.895	9	130.895	187	130.895	62	130.895	0	130.895	0	130.895	0	130.895	341	130.895	0	130.895	0	130.895	70	130.895	35	110.559	74	172.514	0	110.559	3	110.559	37	109.939	0	109.939	15	109.939	7	109.939	60
130.902	0	130.902	11	130.902	219	130.902	157	130.902	0	130.902	0	130.902	0	130.902	370	130.902	0	130.902	0	130.902	86	130.902	35	110.566	62	172.522	0	110.566	6	110.566	36	109.945	0	109.945	10	109.945	5	109.945	45
130.91	0	130.91	12	130.91	274	130.91	202	130.91	5	130.91	0	130.91	0	130.91	488	130.91	0	130.91	0	130.91	137	130.91	43	110.573	70	172.531	0	110.573	45	110.573	33	109.952	0	109.952	7	109.952	3	109.952	31
130.917	1	130.917	37	130.917	295	130.917	225	130.917	9	130.917	0	130.917	0	130.917	477	130.917	0	130.917	0	130.917	124	130.917	65	110.579	67	172.539	3	110.579	43	110.579	26	109.959	0	109.959	31	109.959	18	109.959	51
130.924	1	130.924	43	130.924	285	130.924	233	130.924	2	130.924	0	130.924	0	130.924	499	130.924	0	130.924	0	130.924	82	130.924	55	110.586	51	172.547	0	110.586	85	110.586	23	109.965	11	109.965	66	109.965	23	109.965	39
130.932	3	130.932	30	130.932	384	130.932	263	130.932	0	130.932	0	130.932	0	130.932	571	130.932	0	130.932	0	130.932	94	130.932	77	110.593	48	172.556	0	110.593	148	110.593	33	109.972	5	109.972	41	109.972	23	109.972	24
130.939	0	130.939	24	130.939	447	130.939	267	130.939	0	130.939	0	130.939	0	130.939	830	130.939	4	130.939	0	130.939	87	130.939	44	110.6	60	172.564	0	110.6	131	110.6	6	109.979	2	109.979	24	109.979	11	109.979	17
130.946	1	130.946	22	130.946	459	130.946	324	130.946	1	130.946	0	130.946	0	130.946	901	130.946	2	130.946	7	130.946	93	130.946	77	110.607	45	172.573	0	110.607	191	110.607	4	109.986	16	109.986	17	109.986	16	109.986	16
130.954	11	130.954	31	130.954	401	130.954	320	130.954	3	130.954	0	130.954	0	130.954	909	130.954	0	130.954	7	130.954	56	130.954	90	110.613	64	172.581	2	110.613	288	110.613	15	109.992	11	109.992	9	109.992	43	109.992	19
130.961	0	130.961	49	130.961	362	130.961	305	130.961	3	130.961	0	130.961	0	130.961	775	130.961	0	130.961	2	130.961	51	130.961	57	110.62	63	172.59	0	110.62	279	110.62	78	109.999	13	109.999	5	109.999	31	109.999	13
130.968	3	130.968	64	130.968	347	130.968	275	130.968	0	130.968	1	130.968	0	130.968	606	130.968	0	130.968	2	130.968	57	130.968	29	110.627	61	172.598	0	110.627	224	110.627	47	110.006	4	110.006	17	110.006	57	110.006	8
130.976	0	130.976	31	130.976	295	130.976	285	130.976	0	130.976	0	130.976	0	130.976	482	130.976	0	130.976	5	130.976	29	130.976	22	110.634	42	172.606	0	110.634	175	110.634	50	110.013	24	110.013	15	110.013	41	110.013	19
130.983	0	130.983	22	130.983	221	130.983	208	130.983	2	130.983	0	130.983	0	130.983	381	130.983	0	130.983	0	130.983	26	130.983	21	110.641	60	172.615	0	110.641	182	110.641	110	110.019	22	110.019	11	110.019	19	110.019	13
130.991	5	130.991	11	130.991	213	130.991	215	130.991	9	130.991	0	130.991	0	130.991	308	130.991	1	130.991	1	130.991	23	130.991	12	110.647	60	172.623	0	110.647	146	110.647	181	110.026	4	110.026	10	110.026	32	110.026	9
130.998	4	130.998	21	130.998	192	130.998	164	130.998	3	130.998	0	130.998	0	130.998	217	130.998	0	130.998	0	130.998	11	130.998	7	110.654	58	172.632	0	110.654	138	110.654	297	110.033	1	110.033	13	110.033	32	110.033	12
131.005	3	131.005	19	131.005	107	131.005	87	131.005	5	131.005	0	131.005	0	131.005	191	131.005	0	131.005	3	131.005	7	131.005	5	110.661	48	172.64	11	110.661	110	110.661	272	110.039	0	110.039	35	110.039	13	110.039	26
131.013	3	131.013	37	131.013	78	131.013	33	131.013	0	131.013	0	131.013	0	131.013	159	131.013	0	131.013	0	131.013	4	131.013	8	110.668	49	172.649	14	110.668	111	110.668	304	110.046	5	110.046	25	110.046	18	110.046	14
131.02	2	131.02	8	131.02	42	131.02	35	131.02	0	131.02	0	131.02	0	131.02	132	131.02	0	131.02	0	131.02	15	131.02	8	110.674	68	172.657	13	110.674	149	110.674	270	110.053	14	110.053	18	110.053	24	110.053	23
131.027	0	131.027	1	131.027	11	131.027	55	131.027	1	131.027	0	131.027	0	131.027	95	131.027	0	131.027	0	131.027	14	131.027	3	110.681	88	172.665	3	110.681	194	110.681	213	110.06	4	110.06	30	110.06	13	110.06	19
131.035	1	131.035	0	131.035	26	131.035	34	131.035	0	131.035	0	131.035	0	131.035	70	131.035	0	131.035	0	131.035	6	131.035	0	110.688	82	172.674	0	110.688	227	110.688	114	110.066	1	110.066	30	110.066	6	110.066	19
131.042	0	131.042	2	131.042	6	131.042	17	131.042	0	131.042	0	131.042	0	131.042	46	131.042	0	131.042	0	131.042	5	131.042	1	110.695	70	172.682	0	110.695	300	110.695	117	110.073	0	110.073	39	110.073	3	110.073	27
131.049	0	131.049	4	131.049	4	131.049	27	131.049	0	131.049	0	131.049	0	131.049	20	131.049	0	131.049	0	131.049	16	131.049	5	110.702	73	172.691	5	110.702	222	110.702	116	110.08	1	110.08	24	110.08	8	110.08	21
131.057	0	131.057	1	131.057	23	131.057	13	131.057	0	131.057	0	131.057	0	131.057	25	131.057	0	131.057	0	131.057	4	131.057	9	110.708	61	172.699	1	110.708	209	110.708	70	110.087	6	110.087	28	110.087	29	110.087	22
131.064	3	131.064	6	131.064	8	131.064	10	131.064	0	131.064	0	131.064	0	131.064	21	131.064	0	131.064	0	131.064	1	131.064	3	110.715	56	172.708	0	110.715	143	110.715	24	110.093	17	110.093	23	110.093	11	110.093	45
131.072	3	131.072	4	131.072	6	131.072	4	131.072	0	131.072	0	131.072	0	131.072	19	131.072	0	131.072	0	131.072	4	131.072	0	110.722	83	172.716	0	110.722	141	110.722	58	110.1	18	110.1	15	110.1	12	110.1	30
131.079	4	131.079	6	131.079	0	131.079	7	131.079	0	131.079	0	131.079	0	131.079	9	131.079	0	131.079	0	131.079	4	131.079	3	110.729	124	172.725	0	110.729	163	110.729	70	110.107	9	110.107	20	110.107	11	110.107	29
131.086	0	131.086	3	131.086	5	131.086	3	131.086	0	131.086	0	131.086	0	131.086	8	131.086	0	131.086	0	131.086	3	131.086	6	110.735	126	172.733	7	110.735	104	110.735	37	110.113	8	110.113	18	110.113	5	110.113	42
131.094	2	131.094	2	131.094	1	131.094	2	131.094	0	131.094	0	131.094	0	131.094	16	131.094	0	131.094	0	131.094	5	131.094	1	110.742	136	172.741	14	110.742	56	110.742	32	110.12	9	110.12	17	110.12	2	110.12	101
131.101	3	131.101	4	131.101	0	131.101	8	131.101	0	131.101	0	131.101	0	131.101	12	131.101	0	131.101	0	131.101	3	131.101	1	110.749	119	172.75	2	110.749	46	110.749	79	110.127	61	110.127	16	110.127	1	110.127	150
131.108	0	131.108	10	131.108	4	131.108	0	131.108	0	131.108	0	131.108	0	131.108	8	131.108	0	131.108	0	131.108	1	131.108	4	110.756	91	172.758	2	110.756	42	110.756	35	110.134	72	110.134	11	110.134	16	110.134	168
131.116	0	131.116	8	131.116	2	131.116	0	131.116	0	131.116	0	131.116	0	131.116	8	131.116	0	131.116	0	131.116	1	131.116	8	110.763	76	172.767	1	110.763	46	110.763	36	110.14	51	110.14	46	110.14	23	110.14	213
131.123	0	131.123	5	131.123	0	131.123	1	131.123	0	131.123	0	131.123	0	131.123	4	131.123	0	131.123	0	131.123	3	131.123	2	110.769	95	172.775	14	110.769	74	110.769	19	110.147	77	110.147	73	110.147	8	110.147	185
131.131	0	131.131	4	131.131	4	131.131	0	131.131	0	131.131	0	131.131	0	131.131	5	131.131	0	131.131	0	131.131	7	131.131	6	110.776	63	172.784	9	110.776	159	110.776	24	110.154	67	110.154	76	110.154	14	110.154	229
131.138	0	131.138	5	131.138	3	131.138	0	131.138	0	131.138	0	131.138	0	131.138	6	131.138	0	131.138	0	131.138	3	131.138	9	110.783	25	172.792	2	110.783	181	110.783	4	110.161	90	110.161	41	110.161	24	110.161	322
131.145	0	131.145	7	131.145	0	131.145	3	131.145	0	131.145	0	131.145	0	131.145	1	131.145	0	131.145	0	131.145	0	131.145	10	110.79	31	172.8	0	110.79	109	110.79	35	110.167	86	110.167	74	110.167	16	110.167	392
131.153	0	131.153	1	131.153	0	131.153	0	131.153	0	131.153	0	131.153	0	131.153	3	131.153	0	131.153	0	131.153	0	131.153	5	110.797	83	172.809	0	110.797	72	110.797	20	110.174	51	110.174	48	110.174	7	110.174	431
131.16	0	131.16	3	131.16	3	131.16	1	131.16	0	131.16	0	131.16	0	131.16	4	131.16	0	131.16	0	131.16	0	131.16	6	110.803	111	172.817	0	110.803	69	110.803	7	110.181	56	110.181	121	110.181	4	110.181	463
131.167	0	131.167	6	131.167	4	131.167	0	131.167	0	131.167	0	131.167	0	131.167	3	131.167	0	131.167	0	131.167	0	131.167	0	110.81	62	172.826	0	110.81	77	110.81	6	110.188	98	110.188	118	110.188	2	110.188	402
131.175	0	131.175	5	131.175	1	131.175	0	131.175	0	131.175	0	131.175	0	131.175	7	131.175	0	131.175	0	131.175	3	131.175	0	110.817	42	172.834	0	110.817	83	110.817	28	110.194	46	110.194	73	110.194	5	110.194	311
131.182	0	131.182	3	131.182	2	131.182	0	131.182	0	131.182	0	131.182	0	131.182	4	131.182	0	131.182	0	131.182	2	131.182	4	110.824	50	172.843	0	110.824	67	110.824	7	110.201	19	110.201	60	110.201	4	110.201	355
131.19	0	131.19	5	131.19	1	131.19	0	131.19	0	131.19	0	131.19	0	131.19	6	131.19	0	131.19	0	131.19	3	131.19	5	110.831	32	172.851	0	110.831	77	110.831	1	110.208	30	110.208	48	110.208	9	110.208	318
131.197	0	131.197	6	131.197	2	131.197	0	131.197	0	131.197	0	131.197	0	131.197	0	131.197	0	131.197	0	131.197	5	131.197	6	110.837	65	172.859	0	110.837	99	110.837	0	110.214	5	110.214	64	110.214	15	110.214	270
131.204	0	131.204	8	131.204	9	131.204	2	131.204	0	131.204	0	131.204	0	131.204	4	131.204	0	131.204	0	131.204	9	131.204	2	110.844	66	172.868	0	110.844	51	110.844	12	110.221	0	110.221	51	110.221	3	110.221	313
131.212	0	131.212	4	131.212	2	131.212	0	131.212	0	131.212	0	131.212	0	131.212	4	131.212	0	131.212	0	131.212	6	131.212	0	110.851	60	172.876	8	110.851	52	110.851	51	110.228	0	110.228	52	110.228	0	110.228	364
131.219	0	131.219	6	131.219	0	131.219	0	131.219	0	131.219	0	131.219	0	131.219	3	131.219	0	131.219	0	131.219	2	131.219	0	110.858	105	172.885	6	110.858	34	110.858	89	110.235	15	110.235	33	110.235	0	110.235	327
131.226	0	131.226	9	131.226	4	131.226	2	131.226	0	131.226	0	131.226	0	131.226	2	131.226	0	131.226	0	131.226	12	131.226	0	110.864	96	172.893	0	110.864	26	110.864	44	110.241	16	110.241	31	110.241	3	110.241	203
131.234	0	131.234	7	131.234	0	131.234	5	131.234	0	131.234	0	131.234	0	131.234	1	131.234	0	131.234	0	131.234	2	131.234	0	110.871	108	172.902	0	110.871	41	110.871	21	110.248	17	110.248	75	110.248	18	110.248	203
131.241	0	131.241	1	131.241	0	131.241	1	131.241	0	131.241	0	131.241	0	131.241	0	131.241	0	131.241	0	131.241	0	131.241	7	110.878	82	172.91	0	110.878	29	110.878	15	110.255	6	110.255	58	110.255	11	110.255	199
131.248	0	131.248	3	131.248	0	131.248	1	131.248	0	131.248	0	131.248	0	131.248	2	131.248	0	131.248	0	131.248	0	131.248	8	110.885	100	172.919	0	110.885	22	110.885	12	110.262	13	110.262	72	110.262	10	110.262	190
131.256	0	131.256	0	131.256	0	131.256	4	131.256	0	131.256	0	131.256	0	131.256	1	131.256	0	131.256	0	131.256	0	131.256	6	110.892	106	172.927	1	110.892	42	110.892	22	110.268	5	110.268	56	110.268	9	110.268	183
131.263	0	131.263	0	131.263	0	131.263	4	131.263	0	131.263	0	131.263	0	131.263	0	131.263	0	131.263	0	131.263	6	131.263	1	110.898	87	172.935	0	110.898	39	110.898	21	110.275	25	110.275	14	110.275	14	110.275	157
131.271	0	131.271	6	131.271	0	131.271	4	131.271	0	131.271	0	131.271	0	131.271	0	131.271	0	131.271	0	131.271	1	131.271	3	110.905	94	172.944	0	110.905	43	110.905	39	110.282	16	110.282	52	110.282	10	110.282	132
131.278	0	131.278	1	131.278	2	131.278	0	131.278	0	131.278	0	131.278	0	131.278	0	131.278	0	131.278	0	131.278	0	131.278	1	110.912	84	172.952	0	110.912	25	110.912	22	110.289	3	110.289	56	110.289	4	110.289	142
131.285	0	131.285	0	131.285	0	131.285	0	131.285	0	131.285	0	131.285	0	131.285	3	131.285	0	131.285	0	131.285	1	131.285	5	110.919	103	172.961	0	110.919	24	110.919	8	110.295	6	110.295	95	110.295	2	110.295	182
131.293	0	131.293	1	131.293	0	131.293	1	131.293	0	131.293	0	131.293	0	131.293	0	131.293	0	131.293	0	131.293	0	131.293	4	110.926	88	172.969	0	110.926	8	110.926	7	110.302	10	110.302	73	110.302	7	110.302	161
131.3	0	131.3	1	131.3	0	131.3	0	131.3	0	131.3	0	131.3	0	131.3	1	131.3	0	131.3	0	131.3	6	131.3	0	110.932	75	172.978	0	110.932	10	110.932	7	110.309	7	110.309	36	110.309	17	110.309	139
131.307	0	131.307	0	131.307	2	131.307	0	131.307	0	131.307	0	131.307	0	131.307	5	131.307	0	131.307	2	131.307	3	131.307	6	110.939	77	172.986	2	110.939	20	110.939	10	110.316	2	110.316	25	110.316	11	110.316	102
131.315	0	131.315	4	131.315	0	131.315	0	131.315	0	131.315	0	131.315	0	131.315	0	131.315	0	131.315	0	131.315	0	131.315	2	110.946	94	172.995	0	110.946	9	110.946	17	110.322	0	110.322	12	110.322	9	110.322	112
131.322	0	131.322	3	131.322	4	131.322	0	131.322	0	131.322	0	131.322	0	131.322	1	131.322	0	131.322	0	131.322	0	131.322	4	110.953	71	173.003	0	110.953	28	110.953	10	110.329	0	110.329	25	110.329	4	110.329	151
131.33	0	131.33	3	131.33	0	131.33	0	131.33	0	131.33	0	131.33	0	131.33	0	131.33	0	131.33	0	131.33	1	131.33	2	110.96	72	173.011	0	110.96	25	110.96	15	110.336	0	110.336	48	110.336	5	110.336	113
131.337	0	131.337	7	131.337	2	131.337	3	131.337	0	131.337	0	131.337	0	131.337	1	131.337	0	131.337	0	131.337	5	131.337	1	110.966	48	173.02	0	110.966	20	110.966	21	110.342	3	110.342	38	110.342	12	110.342	89
131.344	2	131.344	0	131.344	0	131.344	4	131.344	0	131.344	0	131.344	0	131.344	2	131.344	0	131.344	0	131.344	2	131.344	1	110.973	46	173.028	1	110.973	7	110.973	13	110.349	11	110.349	26	110.349	4	110.349	118
131.352	0	131.352	0	131.352	0	131.352	1	131.352	0	131.352	0	131.352	0	131.352	0	131.352	0	131.352	0	131.352	1	131.352	1	110.98	51	173.037	14	110.98	5	110.98	27	110.356	4	110.356	40	110.356	16	110.356	99
131.359	0	131.359	4	131.359	0	131.359	0	131.359	0	131.359	0	131.359	0	131.359	6	131.359	0	131.359	0	131.359	0	131.359	11	110.987	60	173.045	2	110.987	0	110.987	22	110.363	5	110.363	45	110.363	34	110.363	73
131.367	0	131.367	3	131.367	1	131.367	3	131.367	0	131.367	0	131.367	0	131.367	1	131.367	0	131.367	0	131.367	0	131.367	3	110.994	62	173.054	0	110.994	1	110.994	10	110.369	2	110.369	50	110.369	19	110.369	37
131.374	0	131.374	7	131.374	0	131.374	0	131.374	0	131.374	0	131.374	0	131.374	1	131.374	0	131.374	0	131.374	1	131.374	17	111	30	173.062	0	111	0	111	5	110.376	9	110.376	26	110.376	12	110.376	58
131.381	0	131.381	8	131.381	0	131.381	0	131.381	0	131.381	0	131.381	0	131.381	0	131.381	0	131.381	0	131.381	0	131.381	2	111.007	27	173.071	0	111.007	3	111.007	51	110.383	3	110.383	17	110.383	9	110.383	49
131.389	0	131.389	5	131.389	8	131.389	0	131.389	0	131.389	0	131.389	0	131.389	1	131.389	0	131.389	0	131.389	3	131.389	0	111.014	29	173.079	4	111.014	5	111.014	28	110.39	0	110.39	11	110.39	6	110.39	21
131.396	0	131.396	7	131.396	9	131.396	0	131.396	0	131.396	0	131.396	0	131.396	0	131.396	0	131.396	0	131.396	0	131.396	7	111.021	37	173.087	23	111.021	18	111.021	17	110.396	0	110.396	11	110.396	23	110.396	11
131.403	0	131.403	7	131.403	3	131.403	0	131.403	0	131.403	0	131.403	0	131.403	0	131.403	0	131.403	0	131.403	0	131.403	0	111.027	39	173.096	9	111.027	3	111.027	9	110.403	1	110.403	17	110.403	24	110.403	9
131.411	0	131.411	1	131.411	2	131.411	0	131.411	0	131.411	0	131.411	0	131.411	0	131.411	0	131.411	0	131.411	0	131.411	4	111.034	61	173.104	17	111.034	36	111.034	30	110.41	0	110.41	27	110.41	23	110.41	5
131.418	0	131.418	3	131.418	0	131.418	0	131.418	0	131.418	0	131.418	0	131.418	0	131.418	0	131.418	0	131.418	3	131.418	7	111.041	72	173.113	29	111.041	34	111.041	32	110.417	11	110.417	60	110.417	20	110.417	26
131.426	0	131.426	1	131.426	1	131.426	1	131.426	0	131.426	0	131.426	0	131.426	0	131.426	0	131.426	0	131.426	3	131.426	8	111.048	66	173.121	13	111.048	11	111.048	16	110.423	19	110.423	42	110.423	19	110.423	20
131.433	0	131.433	2	131.433	0	131.433	1	131.433	0	131.433	0	131.433	0	131.433	0	131.433	0	131.433	0	131.433	1	131.433	1	111.055	45	173.13	27	111.055	9	111.055	17	110.43	8	110.43	33	110.43	19	110.43	15
131.44	0	131.44	3	131.44	8	131.44	0	131.44	0	131.44	0	131.44	0	131.44	0	131.44	0	131.44	0	131.44	0	131.44	0	111.061	44	173.138	74	111.061	4	111.061	10	110.437	2	110.437	45	110.437	8	110.437	10
131.448	0	131.448	6	131.448	12	131.448	4	131.448	0	131.448	0	131.448	0	131.448	0	131.448	0	131.448	0	131.448	1	131.448	18	111.068	44	173.147	42	111.068	1	111.068	2	110.444	0	110.444	42	110.444	7	110.444	16
131.455	0	131.455	5	131.455	3	131.455	0	131.455	0	131.455	0	131.455	0	131.455	2	131.455	0	131.455	0	131.455	3	131.455	20	111.075	75	173.155	20	111.075	2	111.075	0	110.45	8	110.45	21	110.45	34	110.45	22
131.462	0	131.462	5	131.462	0	131.462	3	131.462	0	131.462	0	131.462	0	131.462	3	131.462	0	131.462	0	131.462	6	131.462	6	111.082	52	173.163	47	111.082	1	111.082	0	110.457	19	110.457	12	110.457	42	110.457	31
131.47	0	131.47	2	131.47	4	131.47	6	131.47	0	131.47	1	131.47	0	131.47	2	131.47	0	131.47	0	131.47	2	131.47	0	111.089	35	173.172	49	111.089	21	111.089	13	110.464	3	110.464	25	110.464	20	110.464	37
131.477	0	131.477	3	131.477	5	131.477	4	131.477	0	131.477	0	131.477	0	131.477	0	131.477	0	131.477	0	131.477	6	131.477	0	111.095	49	173.18	58	111.095	18	111.095	23	110.471	2	110.471	24	110.471	10	110.471	25
131.485	0	131.485	3	131.485	1	131.485	0	131.485	0	131.485	0	131.485	0	131.485	0	131.485	0	131.485	0	131.485	0	131.485	1	111.102	70	173.189	36	111.102	12	111.102	11	110.477	21	110.477	35	110.477	13	110.477	16
131.492	0	131.492	8	131.492	8	131.492	0	131.492	0	131.492	0	131.492	0	131.492	0	131.492	0	131.492	0	131.492	0	131.492	0	111.109	98	173.197	35	111.109	7	111.109	31	110.484	20	110.484	18	110.484	16	110.484	17
131.499	0	131.499	15	131.499	3	131.499	0	131.499	0	131.499	0	131.499	0	131.499	0	131.499	0	131.499	0	131.499	0	131.499	2	111.116	114	173.206	71	111.116	14	111.116	28	110.491	21	110.491	24	110.491	31	110.491	19
131.507	0	131.507	18	131.507	0	131.507	2	131.507	0	131.507	0	131.507	0	131.507	0	131.507	0	131.507	0	131.507	7	131.507	0	111.123	96	173.214	62	111.123	21	111.123	25	110.498	19	110.498	39	110.498	35	110.498	30
131.514	0	131.514	7	131.514	1	131.514	1	131.514	0	131.514	0	131.514	0	131.514	7	131.514	0	131.514	0	131.514	6	131.514	3	111.129	81	173.223	36	111.129	12	111.129	14	110.504	6	110.504	59	110.504	45	110.504	15
131.521	0	131.521	0	131.521	3	131.521	6	131.521	0	131.521	0	131.521	0	131.521	3	131.521	0	131.521	0	131.521	3	131.521	3	111.136	94	173.231	30	111.136	35	111.136	17	110.511	0	110.511	37	110.511	23	110.511	11
131.529	0	131.529	10	131.529	0	131.529	19	131.529	0	131.529	0	131.529	0	131.529	1	131.529	0	131.529	0	131.529	4	131.529	4	111.143	66	173.239	13	111.143	24	111.143	4	110.518	0	110.518	15	110.518	14	110.518	2
131.536	0	131.536	3	131.536	2	131.536	6	131.536	0	131.536	0	131.536	0	131.536	1	131.536	0	131.536	0	131.536	1	131.536	5	111.15	37	173.248	21	111.15	7	111.15	2	110.524	0	110.524	30	110.524	13	110.524	0
131.544	0	131.544	4	131.544	3	131.544	1	131.544	0	131.544	0	131.544	0	131.544	16	131.544	0	131.544	0	131.544	1	131.544	1	111.157	103	173.256	20	111.157	4	111.157	5	110.531	0	110.531	23	110.531	25	110.531	0
131.551	3	131.551	8	131.551	0	131.551	3	131.551	0	131.551	0	131.551	0	131.551	9	131.551	0	131.551	0	131.551	0	131.551	0	111.163	62	173.265	61	111.163	32	111.163	0	110.538	0	110.538	30	110.538	30	110.538	16
131.558	0	131.558	2	131.558	3	131.558	0	131.558	0	131.558	0	131.558	0	131.558	5	131.558	0	131.558	0	131.558	0	131.558	1	111.17	41	173.273	52	111.17	26	111.17	8	110.545	0	110.545	29	110.545	41	110.545	28
131.566	0	131.566	0	131.566	0	131.566	0	131.566	0	131.566	0	131.566	0	131.566	4	131.566	0	131.566	0	131.566	1	131.566	0	111.177	50	173.282	45	111.177	8	111.177	11	110.551	0	110.551	26	110.551	53	110.551	16
131.573	0	131.573	2	131.573	4	131.573	0	131.573	0	131.573	0	131.573	0	131.573	1	131.573	0	131.573	0	131.573	0	131.573	2	111.184	38	173.29	41	111.184	3	111.184	2	110.558	0	110.558	27	110.558	44	110.558	9
131.581	2	131.581	0	131.581	1	131.581	6	131.581	0	131.581	0	131.581	0	131.581	0	131.581	0	131.581	0	131.581	0	131.581	5	111.191	53	173.299	64	111.191	0	111.191	0	110.565	4	110.565	16	110.565	43	110.565	5
131.588	0	131.588	12	131.588	2	131.588	0	131.588	0	131.588	0	131.588	0	131.588	2	131.588	0	131.588	0	131.588	3	131.588	1	111.197	67	173.307	38	111.197	5	111.197	0	110.572	0	110.572	5	110.572	37	110.572	1
131.595	7	131.595	6	131.595	0	131.595	7	131.595	0	131.595	0	131.595	0	131.595	6	131.595	0	131.595	0	131.595	5	131.595	0	111.204	61	173.315	42	111.204	16	111.204	6	110.578	10	110.578	1	110.578	27	110.578	3
131.603	3	131.603	2	131.603	0	131.603	5	131.603	0	131.603	0	131.603	0	131.603	21	131.603	0	131.603	0	131.603	3	131.603	0	111.211	85	173.324	15	111.211	14	111.211	3	110.585	8	110.585	3	110.585	23	110.585	2
131.61	0	131.61	2	131.61	2	131.61	0	131.61	0	131.61	0	131.61	0	131.61	13	131.61	0	131.61	0	131.61	3	131.61	0	111.218	110	173.332	30	111.218	13	111.218	1	110.592	3	110.592	15	110.592	14	110.592	9
131.617	0	131.617	0	131.617	0	131.617	0	131.617	0	131.617	0	131.617	0	131.617	0	131.617	0	131.617	0	131.617	6	131.617	3	111.225	79	173.341	14	111.225	5	111.225	8	110.599	0	110.599	18	110.599	19	110.599	7
131.625	0	131.625	0	131.625	0	131.625	3	131.625	0	131.625	0	131.625	0	131.625	1	131.625	0	131.625	0	131.625	3	131.625	0	111.231	75	173.349	3	111.231	6	111.231	5	110.605	0	110.605	21	110.605	32	110.605	19
131.632	0	131.632	13	131.632	0	131.632	0	131.632	0	131.632	0	131.632	0	131.632	4	131.632	0	131.632	0	131.632	16	131.632	2	111.238	108	173.358	2	111.238	17	111.238	14	110.612	0	110.612	17	110.612	35	110.612	24
131.64	0	131.64	3	131.64	0	131.64	1	131.64	0	131.64	0	131.64	0	131.64	1	131.64	0	131.64	0	131.64	4	131.64	2	111.245	112	173.366	40	111.245	8	111.245	36	110.619	3	110.619	8	110.619	37	110.619	7
131.647	0	131.647	2	131.647	0	131.647	1	131.647	0	131.647	0	131.647	0	131.647	2	131.647	0	131.647	0	131.647	5	131.647	0	111.252	73	173.375	24	111.252	14	111.252	38	110.626	10	110.626	7	110.626	32	110.626	3
131.654	0	131.654	1	131.654	0	131.654	2	131.654	0	131.654	0	131.654	0	131.654	0	131.654	0	131.654	0	131.654	6	131.654	0	111.259	48	173.383	40	111.259	13	111.259	24	110.632	2	110.632	26	110.632	54	110.632	0
131.662	0	131.662	1	131.662	0	131.662	0	131.662	0	131.662	0	131.662	0	131.662	4	131.662	0	131.662	0	131.662	10	131.662	0	111.265	93	173.392	16	111.265	4	111.265	14	110.639	0	110.639	38	110.639	27	110.639	0
131.669	0	131.669	1	131.669	0	131.669	0	131.669	0	131.669	0	131.669	0	131.669	4	131.669	0	131.669	0	131.669	4	131.669	0	111.272	70	173.4	5	111.272	4	111.272	1	110.646	0	110.646	22	110.646	16	110.646	3
131.677	0	131.677	9	131.677	0	131.677	0	131.677	0	131.677	0	131.677	0	131.677	7	131.677	0	131.677	0	131.677	2	131.677	9	111.279	84	173.408	4	111.279	15	111.279	3	110.653	2	110.653	12	110.653	20	110.653	0
131.684	0	131.684	5	131.684	0	131.684	1	131.684	0	131.684	0	131.684	0	131.684	8	131.684	0	131.684	0	131.684	5	131.684	5	111.286	75	173.417	0	111.286	12	111.286	23	110.659	10	110.659	6	110.659	12	110.659	2
131.691	2	131.691	1	131.691	0	131.691	0	131.691	0	131.691	0	131.691	0	131.691	9	131.691	0	131.691	0	131.691	2	131.691	2	111.293	80	173.425	0	111.293	5	111.293	32	110.666	9	110.666	8	110.666	10	110.666	22
131.699	0	131.699	1	131.699	0	131.699	6	131.699	0	131.699	0	131.699	0	131.699	2	131.699	0	131.699	0	131.699	6	131.699	1	111.299	100	173.434	0	111.299	5	111.299	37	110.673	6	110.673	19	110.673	25	110.673	16
131.706	0	131.706	4	131.706	0	131.706	3	131.706	0	131.706	0	131.706	0	131.706	0	131.706	0	131.706	0	131.706	6	131.706	0	111.306	82	173.442	1	111.306	5	111.306	14	110.68	5	110.68	37	110.68	34	110.68	21
131.713	0	131.713	0	131.713	0	131.713	0	131.713	0	131.713	0	131.713	0	131.713	0	131.713	0	131.713	0	131.713	1	131.713	4	111.313	75	173.451	13	111.313	30	111.313	23	110.686	0	110.686	22	110.686	37	110.686	22
131.721	0	131.721	17	131.721	0	131.721	4	131.721	0	131.721	0	131.721	0	131.721	1	131.721	0	131.721	0	131.721	6	131.721	3	111.32	62	173.459	0	111.32	34	111.32	26	110.693	2	110.693	32	110.693	48	110.693	25
131.728	0	131.728	14	131.728	0	131.728	7	131.728	1	131.728	0	131.728	0	131.728	5	131.728	0	131.728	0	131.728	7	131.728	0	111.327	80	173.468	0	111.327	32	111.327	14	110.7	37	110.7	38	110.7	24	110.7	31
131.736	2	131.736	4	131.736	2	131.736	3	131.736	0	131.736	0	131.736	0	131.736	3	131.736	0	131.736	0	131.736	10	131.736	1	111.333	90	173.476	0	111.333	11	111.333	3	110.707	29	110.707	28	110.707	14	110.707	13
131.743	0	131.743	0	131.743	8	131.743	2	131.743	0	131.743	0	131.743	0	131.743	6	131.743	0	131.743	0	131.743	6	131.743	0	111.34	108	173.485	0	111.34	3	111.34	17	110.713	15	110.713	19	110.713	8	110.713	9
131.75	0	131.75	6	131.75	9	131.75	2	131.75	0	131.75	0	131.75	0	131.75	8	131.75	0	131.75	0	131.75	17	131.75	0	111.347	68	173.493	0	111.347	1	111.347	24	110.72	14	110.72	19	110.72	10	110.72	5
131.758	0	131.758	12	131.758	3	131.758	6	131.758	0	131.758	0	131.758	0	131.758	7	131.758	0	131.758	0	131.758	29	131.758	0	111.354	53	173.501	14	111.354	12	111.354	38	110.727	12	110.727	7	110.727	22	110.727	6
131.765	0	131.765	39	131.765	10	131.765	0	131.765	0	131.765	0	131.765	0	131.765	17	131.765	0	131.765	1	131.765	41	131.765	4	111.361	83	173.51	32	111.361	17	111.361	67	110.734	1	110.734	11	110.734	37	110.734	32
131.773	0	131.773	57	131.773	34	131.773	2	131.773	0	131.773	0	131.773	0	131.773	19	131.773	0	131.773	0	131.773	58	131.773	10	111.367	64	173.518	15	111.367	5	111.367	25	110.74	0	110.74	24	110.74	64	110.74	33
131.78	0	131.78	37	131.78	46	131.78	10	131.78	0	131.78	0	131.78	0	131.78	21	131.78	0	131.78	0	131.78	100	131.78	34	111.374	44	173.527	1	111.374	12	111.374	17	110.747	0	110.747	8	110.747	67	110.747	9
131.787	0	131.787	52	131.787	90	131.787	31	131.787	0	131.787	0	131.787	0	131.787	14	131.787	0	131.787	1	131.787	177	131.787	63	111.381	66	173.535	0	111.381	11	111.381	17	110.754	7	110.754	21	110.754	60	110.754	19
131.795	0	131.795	81	131.795	159	131.795	27	131.795	0	131.795	0	131.795	0	131.795	25	131.795	0	131.795	0	131.795	259	131.795	95	111.388	81	173.544	0	111.388	4	111.388	33	110.761	15	110.761	22	110.761	34	110.761	8
131.802	4	131.802	83	131.802	290	131.802	75	131.802	0	131.802	0	131.802	0	131.802	51	131.802	0	131.802	0	131.802	315	131.802	150	111.395	75	173.552	0	111.395	0	111.395	22	110.767	3	110.767	32	110.767	23	110.767	7
131.81	2	131.81	106	131.81	558	131.81	146	131.81	0	131.81	0	131.81	0	131.81	89	131.81	0	131.81	0	131.81	472	131.81	217	111.402	60	173.561	0	111.402	0	111.402	13	110.774	0	110.774	11	110.774	19	110.774	7
131.817	0	131.817	137	131.817	922	131.817	344	131.817	0	131.817	0	131.817	0	131.817	84	131.817	1	131.817	0	131.817	668	131.817	247	111.408	78	173.569	0	111.408	0	111.408	7	110.781	0	110.781	26	110.781	13	110.781	8
131.824	1	131.824	160	131.824	1464	131.824	587	131.824	0	131.824	0	131.824	0	131.824	89	131.824	21	131.824	0	131.824	769	131.824	332	111.415	108	173.578	0	111.415	3	111.415	5	110.788	6	110.788	20	110.788	22	110.788	5
131.832	13	131.832	155	131.832	1913	131.832	894	131.832	0	131.832	0	131.832	0	131.832	77	131.832	49	131.832	3	131.832	889	131.832	443	111.422	131	173.586	0	111.422	1	111.422	0	110.794	15	110.794	18	110.794	29	110.794	14
131.839	13	131.839	146	131.839	2474	131.839	1166	131.839	4	131.839	0	131.839	0	131.839	87	131.839	70	131.839	5	131.839	818	131.839	417	111.429	73	173.594	0	111.429	6	111.429	3	110.801	1	110.801	41	110.801	25	110.801	10
131.846	12	131.846	238	131.846	2732	131.846	1195	131.846	3	131.846	1	131.846	0	131.846	94	131.846	88	131.846	4	131.846	637	131.846	417	111.436	49	173.603	0	111.436	23	111.436	26	110.808	0	110.808	22	110.808	22	110.808	14
131.854	76	131.854	330	131.854	2722	131.854	1225	131.854	1	131.854	0	131.854	2	131.854	82	131.854	112	131.854	12	131.854	514	131.854	344	111.442	59	173.611	0	111.442	54	111.442	23	110.815	3	110.815	4	110.815	25	110.815	15
131.861	169	131.861	411	131.861	2615	131.861	1164	131.861	15	131.861	5	131.861	13	131.861	69	131.861	151	131.861	12	131.861	413	131.861	248	111.449	40	173.62	0	111.449	27	111.449	4	110.821	0	110.821	18	110.821	15	110.821	30
131.869	200	131.869	475	131.869	2526	131.869	981	131.869	9	131.869	12	131.869	57	131.869	77	131.869	173	131.869	6	131.869	310	131.869	200	111.456	65	173.628	0	111.456	16	111.456	1	110.828	6	110.828	15	110.828	8	110.828	17
131.876	293	131.876	555	131.876	2230	131.876	861	131.876	36	131.876	33	131.876	150	131.876	76	131.876	218	131.876	8	131.876	180	131.876	116	111.463	77	173.637	0	111.463	29	111.463	20	110.835	26	110.835	17	110.835	7	110.835	6
131.883	470	131.883	695	131.883	1810	131.883	758	131.883	64	131.883	49	131.883	210	131.883	95	131.883	237	131.883	23	131.883	91	131.883	46	111.47	68	173.645	0	111.47	10	111.47	20	110.842	50	110.842	20	110.842	18	110.842	1
131.891	460	131.891	684	131.891	1497	131.891	599	131.891	132	131.891	120	131.891	470	131.891	62	131.891	176	131.891	41	131.891	51	131.891	39	111.476	38	173.654	0	111.476	12	111.476	37	110.848	30	110.848	13	110.848	41	110.848	7
131.898	372	131.898	506	131.898	1061	131.898	459	131.898	338	131.898	180	131.898	999	131.898	39	131.898	104	131.898	80	131.898	38	131.898	27	111.483	66	173.662	0	111.483	8	111.483	17	110.855	11	110.855	23	110.855	34	110.855	6
131.906	169	131.906	335	131.906	572	131.906	227	131.906	629	131.906	163	131.906	1209	131.906	61	131.906	49	131.906	146	131.906	25	131.906	20	111.49	63	173.671	0	111.49	24	111.49	4	110.862	9	110.862	38	110.862	54	110.862	3
131.913	44	131.913	92	131.913	310	131.913	125	131.913	741	131.913	30	131.913	789	131.913	86	131.913	11	131.913	207	131.913	43	131.913	27	111.497	25	173.679	0	111.497	13	111.497	7	110.869	1	110.869	26	110.869	35	110.869	1
131.92	10	131.92	17	131.92	129	131.92	41	131.92	433	131.92	8	131.92	263	131.92	68	131.92	2	131.92	164	131.92	21	131.92	53	111.504	47	173.687	0	111.504	5	111.504	30	110.875	0	110.875	31	110.875	26	110.875	0
131.928	4	131.928	17	131.928	66	131.928	26	131.928	126	131.928	2	131.928	53	131.928	103	131.928	0	131.928	44	131.928	28	131.928	85	111.51	63	173.696	12	111.51	0	111.51	27	110.882	0	110.882	27	110.882	34	110.882	0
131.935	2	131.935	5	131.935	32	131.935	30	131.935	26	131.935	0	131.935	7	131.935	102	131.935	0	131.935	4	131.935	71	131.935	136	111.517	43	173.704	34	111.517	7	111.517	14	110.889	11	110.889	29	110.889	19	110.889	0
131.943	0	131.943	4	131.943	35	131.943	19	131.943	3	131.943	0	131.943	0	131.943	90	131.943	0	131.943	2	131.943	60	131.943	120	111.524	70	173.713	16	111.524	4	111.524	24	110.896	9	110.896	19	110.896	24	110.896	1
131.95	2	131.95	2	131.95	57	131.95	29	131.95	1	131.95	0	131.95	0	131.95	94	131.95	0	131.95	0	131.95	34	131.95	106	111.531	91	173.721	4	111.531	0	111.531	28	110.903	6	110.903	17	110.903	16	110.903	0
131.957	0	131.957	17	131.957	29	131.957	25	131.957	0	131.957	0	131.957	0	131.957	77	131.957	0	131.957	0	131.957	53	131.957	54	111.538	66	173.73	0	111.538	0	111.538	12	110.909	20	110.909	18	110.909	22	110.909	0
131.965	0	131.965	13	131.965	52	131.965	28	131.965	0	131.965	0	131.965	0	131.965	59	131.965	0	131.965	0	131.965	46	131.965	33	111.545	36	173.738	0	111.545	3	111.545	36	110.916	34	110.916	33	110.916	23	110.916	2
131.972	0	131.972	11	131.972	50	131.972	33	131.972	0	131.972	0	131.972	0	131.972	33	131.972	0	131.972	2	131.972	13	131.972	27	111.551	40	173.747	1	111.551	5	111.551	53	110.923	19	110.923	17	110.923	11	110.923	1
131.98	0	131.98	19	131.98	28	131.98	29	131.98	0	131.98	0	131.98	0	131.98	31	131.98	0	131.98	0	131.98	14	131.98	11	111.558	40	173.755	1	111.558	0	111.558	21	110.93	2	110.93	3	110.93	11	110.93	11
131.987	1	131.987	22	131.987	21	131.987	40	131.987	0	131.987	2	131.987	0	131.987	40	131.987	0	131.987	0	131.987	6	131.987	22	111.565	15	173.764	0	111.565	6	111.565	28	110.936	0	110.936	12	110.936	26	110.936	10
131.994	0	131.994	13	131.994	25	131.994	38	131.994	0	131.994	1	131.994	0	131.994	52	131.994	0	131.994	0	131.994	3	131.994	15	111.572	12	173.772	0	111.572	11	111.572	43	110.943	0	110.943	11	110.943	21	110.943	3
132.002	0	132.002	7	132.002	29	132.002	27	132.002	0	132.002	1	132.002	0	132.002	27	132.002	1	132.002	0	132.002	8	132.002	3	111.579	60	173.781	0	111.579	9	111.579	46	110.95	1	110.95	18	110.95	62	110.95	0
132.009	0	132.009	8	132.009	9	132.009	6	132.009	0	132.009	2	132.009	0	132.009	13	132.009	0	132.009	0	132.009	8	132.009	0	111.585	60	173.789	0	111.585	17	111.585	72	110.957	2	110.957	21	110.957	50	110.957	0
132.017	0	132.017	2	132.017	12	132.017	1	132.017	0	132.017	0	132.017	0	132.017	28	132.017	0	132.017	0	132.017	7	132.017	3	111.592	59	173.797	0	111.592	40	111.592	62	110.963	4	110.963	12	110.963	28	110.963	0
132.024	0	132.024	5	132.024	19	132.024	9	132.024	0	132.024	0	132.024	9	132.024	27	132.024	0	132.024	0	132.024	14	132.024	9	111.599	41	173.806	0	111.599	25	111.599	120	110.97	0	110.97	6	110.97	38	110.97	0
132.031	0	132.031	4	132.031	7	132.031	17	132.031	0	132.031	0	132.031	8	132.031	19	132.031	0	132.031	0	132.031	10	132.031	1	111.606	70	173.814	0	111.606	39	111.606	288	110.977	0	110.977	5	110.977	29	110.977	15
132.039	0	132.039	11	132.039	4	132.039	12	132.039	0	132.039	0	132.039	0	132.039	8	132.039	0	132.039	0	132.039	0	132.039	2	111.613	72	173.823	0	111.613	23	111.613	464	110.984	3	110.984	14	110.984	30	110.984	8
132.046	5	132.046	13	132.046	0	132.046	3	132.046	0	132.046	0	132.046	1	132.046	3	132.046	0	132.046	0	132.046	10	132.046	8	111.619	56	173.831	0	111.619	27	111.619	622	110.99	1	110.99	33	110.99	19	110.99	0
132.054	1	132.054	3	132.054	3	132.054	2	132.054	0	132.054	0	132.054	0	132.054	2	132.054	0	132.054	0	132.054	9	132.054	1	111.626	101	173.84	0	111.626	26	111.626	758	110.997	10	110.997	15	110.997	11	110.997	0
132.061	1	132.061	3	132.061	1	132.061	0	132.061	0	132.061	0	132.061	0	132.061	1	132.061	0	132.061	0	132.061	5	132.061	4	111.633	65	173.848	0	111.633	34	111.633	826	111.004	23	111.004	3	111.004	7	111.004	0
132.068	3	132.068	0	132.068	0	132.068	3	132.068	0	132.068	0	132.068	0	132.068	0	132.068	0	132.068	0	132.068	3	132.068	5	111.64	61	173.857	0	111.64	35	111.64	892	111.011	9	111.011	20	111.011	5	111.011	0
132.076	0	132.076	1	132.076	0	132.076	0	132.076	0	132.076	0	132.076	0	132.076	1	132.076	0	132.076	0	132.076	9	132.076	0	111.647	62	173.865	0	111.647	19	111.647	1035	111.017	3	111.017	23	111.017	5	111.017	0
132.083	0	132.083	3	132.083	1	132.083	0	132.083	0	132.083	0	132.083	0	132.083	8	132.083	0	132.083	0	132.083	7	132.083	3	111.654	46	173.874	0	111.654	29	111.654	1046	111.024	13	111.024	38	111.024	21	111.024	2
132.09	7	132.09	2	132.09	1	132.09	1	132.09	0	132.09	0	132.09	0	132.09	2	132.09	0	132.09	0	132.09	2	132.09	4	111.66	18	173.882	0	111.66	82	111.66	994	111.031	5	111.031	18	111.031	10	111.031	17
132.098	8	132.098	2	132.098	5	132.098	2	132.098	0	132.098	0	132.098	0	132.098	0	132.098	0	132.098	0	132.098	1	132.098	5	111.667	14	173.891	0	111.667	115	111.667	893	111.038	0	111.038	12	111.038	6	111.038	3
132.105	7	132.105	2	132.105	4	132.105	0	132.105	0	132.105	0	132.105	0	132.105	2	132.105	0	132.105	0	132.105	1	132.105	16	111.674	48	173.899	0	111.674	76	111.674	726	111.044	0	111.044	35	111.044	22	111.044	0
132.113	1	132.113	1	132.113	5	132.113	4	132.113	0	132.113	0	132.113	0	132.113	0	132.113	0	132.113	0	132.113	1	132.113	9	111.681	82	173.907	0	111.681	107	111.681	554	111.051	0	111.051	63	111.051	24	111.051	0
132.12	0	132.12	7	132.12	0	132.12	4	132.12	0	132.12	0	132.12	0	132.12	2	132.12	0	132.12	0	132.12	3	132.12	1	111.688	66	173.916	0	111.688	113	111.688	364	111.058	8	111.058	48	111.058	32	111.058	0
132.127	0	132.127	6	132.127	1	132.127	0	132.127	0	132.127	0	132.127	0	132.127	1	132.127	0	132.127	0	132.127	4	132.127	0	111.694	51	173.924	0	111.694	111	111.694	268	111.065	3	111.065	24	111.065	54	111.065	1
132.135	0	132.135	3	132.135	2	132.135	0	132.135	0	132.135	0	132.135	0	132.135	1	132.135	0	132.135	0	132.135	3	132.135	0	111.701	66	173.933	0	111.701	103	111.701	237	111.071	0	111.071	14	111.071	30	111.071	2
132.142	0	132.142	8	132.142	8	132.142	3	132.142	0	132.142	0	132.142	0	132.142	0	132.142	0	132.142	0	132.142	2	132.142	5	111.708	45	173.941	0	111.708	87	111.708	168	111.078	0	111.078	12	111.078	24	111.078	4
132.15	0	132.15	10	132.15	3	132.15	0	132.15	0	132.15	0	132.15	0	132.15	3	132.15	0	132.15	0	132.15	3	132.15	7	111.715	32	173.95	0	111.715	129	111.715	73	111.085	0	111.085	38	111.085	19	111.085	5
132.157	0	132.157	6	132.157	4	132.157	0	132.157	0	132.157	0	132.157	0	132.157	0	132.157	0	132.157	0	132.157	10	132.157	2	111.722	61	173.958	8	111.722	61	111.722	31	111.092	0	111.092	70	111.092	9	111.092	0
132.164	0	132.164	1	132.164	4	132.164	1	132.164	0	132.164	0	132.164	0	132.164	0	132.164	0	132.164	3	132.164	9	132.164	4	111.728	43	173.967	1	111.728	76	111.728	18	111.099	11	111.099	28	111.099	7	111.099	0
132.172	0	132.172	0	132.172	0	132.172	0	132.172	0	132.172	0	132.172	0	132.172	0	132.172	0	132.172	1	132.172	1	132.172	4	111.735	36	173.975	0	111.735	62	111.735	57	111.105	3	111.105	50	111.105	5	111.105	3
132.179	0	132.179	0	132.179	4	132.179	0	132.179	0	132.179	2	132.179	0	132.179	1	132.179	0	132.179	0	132.179	0	132.179	2	111.742	31	173.984	0	111.742	81	111.742	84	111.112	0	111.112	24	111.112	5	111.112	0
132.187	1	132.187	0	132.187	0	132.187	0	132.187	0	132.187	0	132.187	0	132.187	0	132.187	0	132.187	0	132.187	1	132.187	7	111.749	13	173.992	0	111.749	89	111.749	86	111.119	2	111.119	68	111.119	27	111.119	2
132.194	0	132.194	0	132.194	0	132.194	2	132.194	0	132.194	0	132.194	0	132.194	0	132.194	0	132.194	0	132.194	2	132.194	10	111.756	91	174.001	0	111.756	65	111.756	61	111.126	16	111.126	69	111.126	31	111.126	5
132.201	0	132.201	1	132.201	0	132.201	1	132.201	0	132.201	0	132.201	0	132.201	1	132.201	0	132.201	0	132.201	6	132.201	4	111.763	118	174.009	0	111.763	73	111.763	37	111.132	53	111.132	54	111.132	25	111.132	87
132.209	0	132.209	3	132.209	9	132.209	0	132.209	1	132.209	0	132.209	0	132.209	0	132.209	0	132.209	0	132.209	1	132.209	8	111.769	85	174.018	0	111.769	107	111.769	36	111.139	61	111.139	25	111.139	45	111.139	94
132.216	0	132.216	3	132.216	4	132.216	0	132.216	0	132.216	0	132.216	0	132.216	0	132.216	0	132.216	0	132.216	1	132.216	1	111.776	88	174.026	0	111.776	118	111.776	23	111.146	64	111.146	73	111.146	42	111.146	82
132.224	0	132.224	0	132.224	0	132.224	3	132.224	0	132.224	0	132.224	2	132.224	3	132.224	0	132.224	0	132.224	15	132.224	0	111.783	76	174.034	0	111.783	190	111.783	37	111.153	55	111.153	102	111.153	39	111.153	100
132.231	0	132.231	1	132.231	0	132.231	2	132.231	0	132.231	0	132.231	0	132.231	0	132.231	0	132.231	0	132.231	7	132.231	0	111.79	90	174.043	0	111.79	165	111.79	47	111.159	130	111.159	105	111.159	47	111.159	94
132.238	0	132.238	0	132.238	0	132.238	5	132.238	0	132.238	0	132.238	0	132.238	1	132.238	0	132.238	0	132.238	3	132.238	1	111.797	69	174.051	10	111.797	170	111.797	37	111.166	173	111.166	75	111.166	27	111.166	129
132.246	0	132.246	0	132.246	0	132.246	0	132.246	0	132.246	0	132.246	0	132.246	3	132.246	0	132.246	0	132.246	0	132.246	0	111.803	82	174.06	16	111.803	162	111.803	21	111.173	140	111.173	96	111.173	23	111.173	260
132.253	0	132.253	5	132.253	0	132.253	1	132.253	0	132.253	0	132.253	0	132.253	0	132.253	0	132.253	0	132.253	0	132.253	3	111.81	61	174.068	5	111.81	171	111.81	15	111.18	91	111.18	142	111.18	18	111.18	282
132.261	0	132.261	0	132.261	2	132.261	5	132.261	0	132.261	0	132.261	0	132.261	1	132.261	0	132.261	0	132.261	0	132.261	2	111.817	69	174.077	5	111.817	115	111.817	32	111.186	105	111.186	120	111.186	21	111.186	308
132.268	0	132.268	1	132.268	2	132.268	8	132.268	0	132.268	0	132.268	0	132.268	1	132.268	0	132.268	0	132.268	4	132.268	0	111.824	44	174.085	6	111.824	109	111.824	26	111.193	125	111.193	60	111.193	28	111.193	293
132.275	0	132.275	0	132.275	0	132.275	3	132.275	0	132.275	0	132.275	0	132.275	4	132.275	0	132.275	0	132.275	5	132.275	4	111.831	90	174.094	3	111.831	132	111.831	35	111.2	117	111.2	67	111.2	20	111.2	333
132.283	0	132.283	12	132.283	0	132.283	0	132.283	0	132.283	0	132.283	0	132.283	3	132.283	0	132.283	0	132.283	0	132.283	1	111.838	78	174.102	0	111.838	67	111.838	35	111.207	95	111.207	43	111.207	39	111.207	322
132.29	0	132.29	5	132.29	0	132.29	4	132.29	0	132.29	0	132.29	0	132.29	3	132.29	0	132.29	0	132.29	3	132.29	1	111.844	54	174.111	0	111.844	39	111.844	57	111.214	106	111.214	39	111.214	82	111.214	374
132.298	0	132.298	7	132.298	0	132.298	6	132.298	0	132.298	0	132.298	0	132.298	0	132.298	0	132.298	0	132.298	1	132.298	0	111.851	34	174.119	12	111.851	21	111.851	81	111.22	90	111.22	44	111.22	47	111.22	499
132.305	0	132.305	7	132.305	1	132.305	9	132.305	0	132.305	0	132.305	0	132.305	3	132.305	0	132.305	0	132.305	3	132.305	1	111.858	32	174.128	20	111.858	76	111.858	48	111.227	49	111.227	82	111.227	27	111.227	409
132.313	0	132.313	5	132.313	0	132.313	0	132.313	0	132.313	0	132.313	0	132.313	5	132.313	0	132.313	0	132.313	0	132.313	2	111.865	44	174.136	63	111.865	71	111.865	23	111.234	22	111.234	69	111.234	53	111.234	283
132.32	0	132.32	2	132.32	0	132.32	0	132.32	0	132.32	0	132.32	0	132.32	1	132.32	0	132.32	0	132.32	6	132.32	0	111.872	51	174.145	149	111.872	37	111.872	6	111.241	42	111.241	43	111.241	38	111.241	325
132.327	0	132.327	6	132.327	12	132.327	0	132.327	0	132.327	0	132.327	0	132.327	0	132.327	0	132.327	0	132.327	3	132.327	3	111.878	77	174.153	131	111.878	13	111.878	4	111.247	51	111.247	61	111.247	19	111.247	355
132.335	0	132.335	1	132.335	11	132.335	6	132.335	0	132.335	0	132.335	0	132.335	1	132.335	0	132.335	0	132.335	8	132.335	1	111.885	83	174.162	190	111.885	12	111.885	23	111.254	52	111.254	55	111.254	15	111.254	361
132.342	0	132.342	1	132.342	2	132.342	9	132.342	0	132.342	0	132.342	0	132.342	0	132.342	0	132.342	0	132.342	9	132.342	1	111.892	47	174.17	272	111.892	21	111.892	32	111.261	50	111.261	44	111.261	8	111.261	381
132.35	0	132.35	0	132.35	1	132.35	0	132.35	0	132.35	0	132.35	0	132.35	4	132.35	0	132.35	0	132.35	5	132.35	0	111.899	72	174.178	263	111.899	9	111.899	43	111.268	48	111.268	42	111.268	4	111.268	394
132.357	0	132.357	0	132.357	0	132.357	0	132.357	0	132.357	0	132.357	0	132.357	2	132.357	0	132.357	0	132.357	6	132.357	1	111.906	73	174.187	227	111.906	20	111.906	29	111.274	15	111.274	6	111.274	2	111.274	288
132.364	0	132.364	0	132.364	5	132.364	3	132.364	0	132.364	0	132.364	0	132.364	5	132.364	0	132.364	0	132.364	9	132.364	4	111.913	48	174.195	225	111.913	26	111.913	9	111.281	2	111.281	21	111.281	16	111.281	227
132.372	0	132.372	0	132.372	2	132.372	6	132.372	0	132.372	0	132.372	0	132.372	0	132.372	0	132.372	0	132.372	12	132.372	7	111.919	35	174.204	193	111.919	11	111.919	23	111.288	1	111.288	36	111.288	16	111.288	193
132.379	0	132.379	0	132.379	2	132.379	0	132.379	0	132.379	0	132.379	0	132.379	4	132.379	0	132.379	0	132.379	9	132.379	1	111.926	62	174.212	157	111.926	1	111.926	16	111.295	14	111.295	41	111.295	16	111.295	237
132.387	0	132.387	0	132.387	1	132.387	0	132.387	0	132.387	0	132.387	0	132.387	2	132.387	0	132.387	0	132.387	1	132.387	0	111.933	81	174.221	139	111.933	4	111.933	21	111.301	30	111.301	42	111.301	32	111.301	285
132.394	0	132.394	0	132.394	0	132.394	0	132.394	0	132.394	0	132.394	0	132.394	0	132.394	0	132.394	0	132.394	7	132.394	0	111.94	67	174.229	83	111.94	59	111.94	23	111.308	11	111.308	37	111.308	26	111.308	204
132.401	0	132.401	1	132.401	1	132.401	0	132.401	0	132.401	0	132.401	0	132.401	1	132.401	0	132.401	0	132.401	2	132.401	0	111.947	54	174.238	26	111.947	95	111.947	7	111.315	23	111.315	12	111.315	10	111.315	162
132.409	0	132.409	0	132.409	1	132.409	6	132.409	0	132.409	0	132.409	0	132.409	1	132.409	0	132.409	0	132.409	2	132.409	0	111.954	124	174.246	24	111.954	48	111.954	16	111.322	14	111.322	2	111.322	5	111.322	115
132.416	0	132.416	4	132.416	0	132.416	2	132.416	0	132.416	0	132.416	0	132.416	6	132.416	0	132.416	0	132.416	2	132.416	2	111.96	110	174.255	80	111.96	38	111.96	41	111.329	5	111.329	7	111.329	4	111.329	99
132.424	0	132.424	0	132.424	1	132.424	1	132.424	0	132.424	0	132.424	0	132.424	4	132.424	0	132.424	0	132.424	2	132.424	0	111.967	79	174.263	54	111.967	11	111.967	19	111.335	7	111.335	10	111.335	10	111.335	122
132.431	0	132.431	2	132.431	0	132.431	1	132.431	0	132.431	0	132.431	0	132.431	5	132.431	0	132.431	0	132.431	0	132.431	0	111.974	53	174.272	62	111.974	3	111.974	13	111.342	3	111.342	35	111.342	8	111.342	118
132.438	0	132.438	0	132.438	1	132.438	0	132.438	0	132.438	0	132.438	0	132.438	0	132.438	0	132.438	0	132.438	8	132.438	0	111.981	46	174.28	69	111.981	25	111.981	19	111.349	39	111.349	29	111.349	1	111.349	89
132.446	0	132.446	1	132.446	1	132.446	1	132.446	0	132.446	0	132.446	0	132.446	2	132.446	0	132.446	0	132.446	0	132.446	15	111.988	49	174.289	35	111.988	22	111.988	7	111.356	36	111.356	31	111.356	7	111.356	51
132.453	0	132.453	5	132.453	5	132.453	1	132.453	0	132.453	0	132.453	0	132.453	0	132.453	0	132.453	0	132.453	0	132.453	7	111.994	75	174.297	26	111.994	23	111.994	2	111.362	13	111.362	27	111.362	9	111.362	30
132.461	0	132.461	5	132.461	0	132.461	2	132.461	0	132.461	0	132.461	0	132.461	0	132.461	0	132.461	0	132.461	2	132.461	3	112.001	76	174.306	36	112.001	20	112.001	30	111.369	10	111.369	15	111.369	5	111.369	75
132.468	0	132.468	17	132.468	1	132.468	0	132.468	0	132.468	0	132.468	0	132.468	5	132.468	0	132.468	0	132.468	10	132.468	4	112.008	94	174.314	48	112.008	32	112.008	34	111.376	2	111.376	18	111.376	8	111.376	55
132.475	0	132.475	11	132.475	0	132.475	2	132.475	0	132.475	0	132.475	0	132.475	0	132.475	0	132.475	0	132.475	5	132.475	1	112.015	85	174.322	25	112.015	15	112.015	17	111.383	0	111.383	16	111.383	27	111.383	18
132.483	0	132.483	5	132.483	0	132.483	4	132.483	0	132.483	0	132.483	0	132.483	0	132.483	0	132.483	0	132.483	8	132.483	2	112.022	62	174.331	20	112.022	4	112.022	11	111.39	0	111.39	6	111.39	18	111.39	22
132.49	0	132.49	4	132.49	2	132.49	2	132.49	0	132.49	0	132.49	0	132.49	9	132.49	0	132.49	0	132.49	8	132.49	0	112.029	39	174.339	36	112.029	3	112.029	22	111.396	0	111.396	12	111.396	17	111.396	32
132.498	0	132.498	1	132.498	0	132.498	0	132.498	0	132.498	0	132.498	0	132.498	11	132.498	0	132.498	0	132.498	4	132.498	0	112.035	50	174.348	22	112.035	0	112.035	34	111.403	5	111.403	16	111.403	19	111.403	29
132.505	0	132.505	1	132.505	0	132.505	3	132.505	0	132.505	0	132.505	0	132.505	15	132.505	0	132.505	0	132.505	3	132.505	0	112.042	64	174.356	23	112.042	5	112.042	25	111.41	11	111.41	38	111.41	14	111.41	13
132.512	0	132.512	9	132.512	2	132.512	1	132.512	0	132.512	0	132.512	0	132.512	10	132.512	0	132.512	0	132.512	16	132.512	1	112.049	62	174.365	20	112.049	3	112.049	29	111.417	2	111.417	29	111.417	9	111.417	6
132.52	0	132.52	11	132.52	0	132.52	0	132.52	0	132.52	0	132.52	0	132.52	1	132.52	0	132.52	0	132.52	7	132.52	9	112.056	79	174.373	12	112.056	7	112.056	18	111.423	0	111.423	33	111.423	29	111.423	23
132.527	0	132.527	5	132.527	0	132.527	0	132.527	0	132.527	0	132.527	0	132.527	2	132.527	0	132.527	0	132.527	7	132.527	0	112.063	97	174.382	2	112.063	18	112.063	6	111.43	2	111.43	67	111.43	19	111.43	29
132.535	0	132.535	7	132.535	0	132.535	1	132.535	0	132.535	0	132.535	0	132.535	4	132.535	0	132.535	0	132.535	3	132.535	0	112.07	77	174.39	0	112.07	16	112.07	19	111.437	15	111.437	63	111.437	33	111.437	18
132.542	0	132.542	5	132.542	0	132.542	13	132.542	0	132.542	0	132.542	0	132.542	1	132.542	0	132.542	0	132.542	3	132.542	1	112.076	70	174.399	0	112.076	12	112.076	27	111.444	5	111.444	53	111.444	57	111.444	13
132.55	0	132.55	3	132.55	0	132.55	2	132.55	0	132.55	0	132.55	0	132.55	1	132.55	0	132.55	0	132.55	2	132.55	0	112.083	110	174.407	3	112.083	2	112.083	5	111.45	3	111.45	24	111.45	29	111.45	6
132.557	0	132.557	0	132.557	0	132.557	3	132.557	0	132.557	0	132.557	0	132.557	0	132.557	0	132.557	0	132.557	2	132.557	1	112.09	98	174.416	0	112.09	1	112.09	11	111.457	3	111.457	15	111.457	16	111.457	16
132.564	0	132.564	2	132.564	0	132.564	2	132.564	0	132.564	0	132.564	0	132.564	1	132.564	0	132.564	0	132.564	8	132.564	5	112.097	85	174.424	0	112.097	4	112.097	1	111.464	0	111.464	28	111.464	13	111.464	13
132.572	1	132.572	3	132.572	1	132.572	6	132.572	0	132.572	0	132.572	0	132.572	3	132.572	0	132.572	0	132.572	3	132.572	4	112.104	119	174.433	0	112.104	1	112.104	0	111.471	0	111.471	17	111.471	8	111.471	13
132.579	0	132.579	6	132.579	0	132.579	3	132.579	0	132.579	0	132.579	0	132.579	0	132.579	0	132.579	0	132.579	2	132.579	1	112.111	130	174.441	2	112.111	16	112.111	5	111.478	0	111.478	6	111.478	7	111.478	21
132.587	0	132.587	3	132.587	2	132.587	1	132.587	1	132.587	0	132.587	0	132.587	0	132.587	0	132.587	0	132.587	1	132.587	0	112.117	122	174.45	2	112.117	22	112.117	2	111.484	11	111.484	31	111.484	5	111.484	35
132.594	0	132.594	0	132.594	0	132.594	7	132.594	0	132.594	0	132.594	0	132.594	0	132.594	0	132.594	0	132.594	1	132.594	1	112.124	107	174.458	0	112.124	8	112.124	0	111.491	22	111.491	31	111.491	18	111.491	11
132.601	0	132.601	3	132.601	0	132.601	0	132.601	0	132.601	0	132.601	0	132.601	7	132.601	0	132.601	0	132.601	3	132.601	1	112.131	70	174.467	0	112.131	14	112.131	12	111.498	6	111.498	17	111.498	47	111.498	5
132.609	0	132.609	5	132.609	1	132.609	2	132.609	0	132.609	0	132.609	0	132.609	3	132.609	0	132.609	0	132.609	4	132.609	2	112.138	40	174.475	0	112.138	3	112.138	22	111.505	1	111.505	11	111.505	26	111.505	1
132.616	0	132.616	5	132.616	0	132.616	3	132.616	0	132.616	0	132.616	0	132.616	5	132.616	0	132.616	0	132.616	9	132.616	2	112.145	59	174.484	0	112.145	12	112.145	59	111.511	0	111.511	34	111.511	10	111.511	5
132.624	0	132.624	2	132.624	2	132.624	2	132.624	0	132.624	0	132.624	0	132.624	0	132.624	0	132.624	0	132.624	0	132.624	2	112.151	70	174.492	0	112.151	7	112.151	81	111.518	0	111.518	19	111.518	7	111.518	18
132.631	0	132.631	0	132.631	0	132.631	4	132.631	0	132.631	0	132.631	0	132.631	0	132.631	0	132.631	0	132.631	3	132.631	1	112.158	90	174.5	0	112.158	29	112.158	44	111.525	0	111.525	19	111.525	20	111.525	11
132.638	0	132.638	5	132.638	0	132.638	0	132.638	0	132.638	0	132.638	0	132.638	0	132.638	0	132.638	0	132.638	2	132.638	0	112.165	93	174.509	0	112.165	76	112.165	48	111.532	4	111.532	52	111.532	21	111.532	3
132.646	0	132.646	11	132.646	3	132.646	0	132.646	0	132.646	0	132.646	0	132.646	0	132.646	0	132.646	0	132.646	0	132.646	5	112.172	102	174.517	0	112.172	78	112.172	37	111.539	1	111.539	48	111.539	29	111.539	5
132.653	1	132.653	5	132.653	2	132.653	0	132.653	0	132.653	0	132.653	0	132.653	0	132.653	0	132.653	0	132.653	3	132.653	16	112.179	131	174.526	11	112.179	38	112.179	30	111.545	17	111.545	29	111.545	31	111.545	0
132.661	0	132.661	3	132.661	0	132.661	4	132.661	0	132.661	0	132.661	0	132.661	4	132.661	0	132.661	0	132.661	18	132.661	5	112.186	141	174.534	1	112.186	39	112.186	17	111.552	20	111.552	41	111.552	18	111.552	0
132.668	0	132.668	6	132.668	0	132.668	0	132.668	0	132.668	0	132.668	0	132.668	1	132.668	0	132.668	0	132.668	3	132.668	5	112.192	164	174.543	1	112.192	51	112.192	11	111.559	14	111.559	27	111.559	10	111.559	0
132.676	0	132.676	7	132.676	0	132.676	10	132.676	0	132.676	0	132.676	0	132.676	0	132.676	0	132.676	0	132.676	9	132.676	0	112.199	154	174.551	8	112.199	67	112.199	24	111.566	12	111.566	46	111.566	8	111.566	10
132.683	0	132.683	3	132.683	1	132.683	6	132.683	0	132.683	0	132.683	0	132.683	0	132.683	0	132.683	0	132.683	0	132.683	4	112.206	70	174.56	13	112.206	74	112.206	109	111.572	3	111.572	33	111.572	17	111.572	23
132.69	0	132.69	4	132.69	8	132.69	1	132.69	0	132.69	0	132.69	0	132.69	5	132.69	0	132.69	0	132.69	3	132.69	15	112.213	49	174.568	11	112.213	36	112.213	82	111.579	3	111.579	39	111.579	12	111.579	33
132.698	0	132.698	6	132.698	7	132.698	2	132.698	0	132.698	0	132.698	0	132.698	2	132.698	0	132.698	0	132.698	4	132.698	3	112.22	72	174.577	8	112.22	14	112.22	56	111.586	0	111.586	56	111.586	5	111.586	18
132.705	0	132.705	3	132.705	1	132.705	0	132.705	0	132.705	0	132.705	0	132.705	1	132.705	0	132.705	0	132.705	2	132.705	0	112.227	93	174.585	4	112.227	7	112.227	42	111.593	0	111.593	30	111.593	3	111.593	7
132.713	0	132.713	3	132.713	2	132.713	0	132.713	0	132.713	0	132.713	0	132.713	2	132.713	0	132.713	0	132.713	1	132.713	4	112.233	60	174.594	0	112.233	18	112.233	16	111.6	0	111.6	60	111.6	0	111.6	1
132.72	0	132.72	2	132.72	0	132.72	3	132.72	0	132.72	0	132.72	0	132.72	0	132.72	0	132.72	1	132.72	4	132.72	2	112.24	67	174.602	0	112.24	6	112.24	21	111.606	0	111.606	49	111.606	1	111.606	4
132.727	0	132.727	9	132.727	0	132.727	1	132.727	0	132.727	0	132.727	0	132.727	0	132.727	0	132.727	0	132.727	0	132.727	1	112.247	85	174.611	0	112.247	4	112.247	26	111.613	0	111.613	27	111.613	0	111.613	17
132.735	0	132.735	12	132.735	0	132.735	4	132.735	0	132.735	0	132.735	0	132.735	2	132.735	0	132.735	0	132.735	5	132.735	0	112.254	62	174.619	0	112.254	0	112.254	25	111.62	0	111.62	24	111.62	0	111.62	19
132.742	0	132.742	4	132.742	0	132.742	0	132.742	0	132.742	0	132.742	0	132.742	0	132.742	0	132.742	0	132.742	5	132.742	9	112.261	35	174.628	0	112.261	0	112.261	9	111.627	0	111.627	28	111.627	0	111.627	5
132.75	0	132.75	3	132.75	0	132.75	2	132.75	0	132.75	0	132.75	0	132.75	6	132.75	0	132.75	0	132.75	5	132.75	5	112.268	39	174.636	2	112.268	3	112.268	3	111.633	1	111.633	28	111.633	14	111.633	1
132.757	0	132.757	2	132.757	0	132.757	0	132.757	0	132.757	0	132.757	0	132.757	7	132.757	0	132.757	0	132.757	1	132.757	3	112.274	56	174.645	0	112.274	0	112.274	37	111.64	7	111.64	20	111.64	26	111.64	10
132.765	0	132.765	3	132.765	6	132.765	3	132.765	0	132.765	0	132.765	0	132.765	4	132.765	0	132.765	0	132.765	3	132.765	2	112.281	55	174.653	2	112.281	1	112.281	44	111.647	1	111.647	16	111.647	25	111.647	5
132.772	0	132.772	6	132.772	14	132.772	2	132.772	0	132.772	0	132.772	0	132.772	2	132.772	0	132.772	0	132.772	0	132.772	2	112.288	40	174.662	13	112.288	23	112.288	22	111.654	0	111.654	22	111.654	22	111.654	0
132.779	0	132.779	9	132.779	21	132.779	0	132.779	0	132.779	0	132.779	0	132.779	2	132.779	0	132.779	0	132.779	1	132.779	0	112.295	27	174.67	4	112.295	13	112.295	17	111.661	1	111.661	11	111.661	11	111.661	11
132.787	0	132.787	10	132.787	11	132.787	0	132.787	0	132.787	0	132.787	0	132.787	0	132.787	0	132.787	0	132.787	2	132.787	2	112.302	33	174.679	0	112.302	4	112.302	22	111.667	0	111.667	12	111.667	19	111.667	18
132.794	0	132.794	9	132.794	2	132.794	0	132.794	0	132.794	0	132.794	0	132.794	2	132.794	0	132.794	0	132.794	7	132.794	7	112.309	70	174.687	0	112.309	29	112.309	37	111.674	0	111.674	25	111.674	21	111.674	4
132.802	0	132.802	8	132.802	1	132.802	0	132.802	0	132.802	0	132.802	0	132.802	2	132.802	0	132.802	0	132.802	6	132.802	16	112.315	43	174.696	0	112.315	37	112.315	23	111.681	0	111.681	32	111.681	11	111.681	2
132.809	3	132.809	22	132.809	7	132.809	4	132.809	0	132.809	0	132.809	0	132.809	17	132.809	0	132.809	0	132.809	10	132.809	22	112.322	67	174.704	1	112.322	18	112.322	12	111.688	0	111.688	41	111.688	7	111.688	0
132.816	2	132.816	28	132.816	21	132.816	14	132.816	0	132.816	0	132.816	0	132.816	18	132.816	0	132.816	0	132.816	12	132.816	18	112.329	90	174.713	0	112.329	4	112.329	1	111.694	0	111.694	71	111.694	5	111.694	2
132.824	0	132.824	15	132.824	14	132.824	9	132.824	0	132.824	0	132.824	0	132.824	24	132.824	0	132.824	0	132.824	16	132.824	6	112.336	80	174.721	0	112.336	5	112.336	26	111.701	0	111.701	55	111.701	6	111.701	23
132.831	0	132.831	17	132.831	36	132.831	13	132.831	0	132.831	0	132.831	0	132.831	18	132.831	0	132.831	0	132.831	38	132.831	26	112.343	78	174.73	8	112.343	4	112.343	29	111.708	0	111.708	29	111.708	13	111.708	22
132.839	0	132.839	15	132.839	58	132.839	5	132.839	0	132.839	0	132.839	0	132.839	26	132.839	0	132.839	0	132.839	60	132.839	34	112.35	41	174.738	28	112.35	1	112.35	26	111.715	0	111.715	30	111.715	18	111.715	8
132.846	0	132.846	10	132.846	42	132.846	14	132.846	0	132.846	0	132.846	0	132.846	17	132.846	0	132.846	0	132.846	41	132.846	26	112.356	59	174.746	11	112.356	1	112.356	39	111.722	1	111.722	20	111.722	17	111.722	3
132.854	0	132.854	5	132.854	68	132.854	18	132.854	0	132.854	0	132.854	0	132.854	22	132.854	0	132.854	0	132.854	48	132.854	38	112.363	59	174.755	5	112.363	8	112.363	12	111.728	9	111.728	10	111.728	7	111.728	3
132.861	1	132.861	6	132.861	78	132.861	18	132.861	0	132.861	0	132.861	0	132.861	30	132.861	0	132.861	0	132.861	54	132.861	42	112.37	42	174.763	1	112.37	7	112.37	12	111.735	1	111.735	4	111.735	7	111.735	4
132.868	0	132.868	16	132.868	95	132.868	19	132.868	0	132.868	0	132.868	1	132.868	42	132.868	0	132.868	1	132.868	50	132.868	35	112.377	45	174.772	0	112.377	1	112.377	17	111.742	3	111.742	5	111.742	7	111.742	4
132.876	0	132.876	26	132.876	96	132.876	45	132.876	0	132.876	0	132.876	0	132.876	62	132.876	0	132.876	0	132.876	43	132.876	37	112.384	97	174.78	0	112.384	0	112.384	8	111.749	8	111.749	7	111.749	3	111.749	0
132.883	0	132.883	12	132.883	101	132.883	42	132.883	0	132.883	0	132.883	0	132.883	58	132.883	0	132.883	3	132.883	45	132.883	20	112.391	102	174.789	0	112.391	0	112.391	28	111.755	7	111.755	12	111.755	3	111.755	0
132.891	0	132.891	20	132.891	115	132.891	51	132.891	0	132.891	0	132.891	0	132.891	103	132.891	0	132.891	4	132.891	39	132.891	34	112.397	67	174.797	11	112.397	0	112.397	22	111.762	1	111.762	11	111.762	0	111.762	10
132.898	3	132.898	23	132.898	109	132.898	29	132.898	0	132.898	0	132.898	0	132.898	75	132.898	0	132.898	0	132.898	30	132.898	30	112.404	110	174.806	16	112.404	0	112.404	8	111.769	0	111.769	3	111.769	0	111.769	2
132.905	1	132.905	15	132.905	123	132.905	52	132.905	2	132.905	0	132.905	0	132.905	96	132.905	0	132.905	1	132.905	64	132.905	22	112.411	88	174.814	3	112.411	0	112.411	6	111.776	0	111.776	26	111.776	0	111.776	0
132.913	2	132.913	15	132.913	142	132.913	39	132.913	0	132.913	0	132.913	0	132.913	109	132.913	0	132.913	0	132.913	72	132.913	26	112.418	63	174.823	0	112.418	16	112.418	14	111.783	0	111.783	22	111.783	1	111.783	0
132.92	0	132.92	23	132.92	135	132.92	70	132.92	2	132.92	0	132.92	0	132.92	174	132.92	0	132.92	1	132.92	78	132.92	43	112.425	44	174.831	0	112.425	33	112.425	15	111.789	0	111.789	20	111.789	6	111.789	9
132.928	0	132.928	7	132.928	97	132.928	104	132.928	0	132.928	0	132.928	0	132.928	159	132.928	0	132.928	1	132.928	75	132.928	33	112.432	47	174.84	23	112.432	21	112.432	52	111.796	0	111.796	4	111.796	13	111.796	17
132.935	2	132.935	8	132.935	132	132.935	93	132.935	0	132.935	0	132.935	0	132.935	129	132.935	0	132.935	0	132.935	64	132.935	27	112.439	60	174.848	23	112.439	35	112.439	65	111.803	4	111.803	12	111.803	5	111.803	29
132.943	1	132.943	10	132.943	109	132.943	98	132.943	2	132.943	0	132.943	0	132.943	149	132.943	2	132.943	0	132.943	47	132.943	47	112.445	52	174.857	6	112.445	15	112.445	24	111.81	2	111.81	29	111.81	4	111.81	25
132.95	0	132.95	23	132.95	123	132.95	93	132.95	0	132.95	0	132.95	0	132.95	150	132.95	0	132.95	1	132.95	57	132.95	28	112.452	61	174.865	1	112.452	3	112.452	28	111.816	0	111.816	17	111.816	1	111.816	5
132.957	8	132.957	26	132.957	108	132.957	93	132.957	0	132.957	0	132.957	0	132.957	130	132.957	6	132.957	1	132.957	55	132.957	37	112.459	89	174.874	0	112.459	0	112.459	37	111.823	0	111.823	28	111.823	0	111.823	0
132.965	4	132.965	16	132.965	99	132.965	90	132.965	0	132.965	0	132.965	0	132.965	100	132.965	0	132.965	0	132.965	51	132.965	22	112.466	33	174.882	0	112.466	2	112.466	18	111.83	2	111.83	29	111.83	0	111.83	0
132.972	8	132.972	17	132.972	114	132.972	109	132.972	0	132.972	0	132.972	0	132.972	120	132.972	0	132.972	0	132.972	32	132.972	23	112.473	77	174.891	1	112.473	8	112.473	31	111.837	6	111.837	17	111.837	9	111.837	0
132.98	5	132.98	6	132.98	125	132.98	115	132.98	0	132.98	0	132.98	0	132.98	81	132.98	0	132.98	1	132.98	14	132.98	22	112.48	93	174.899	0	112.48	3	112.48	20	111.844	8	111.844	14	111.844	9	111.844	5
132.987	1	132.987	14	132.987	128	132.987	126	132.987	0	132.987	0	132.987	0	132.987	62	132.987	0	132.987	10	132.987	17	132.987	28	112.486	92	174.908	15	112.486	0	112.486	18	111.85	0	111.85	4	111.85	17	111.85	7
132.995	3	132.995	20	132.995	85	132.995	93	132.995	0	132.995	0	132.995	0	132.995	50	132.995	0	132.995	0	132.995	10	132.995	19	112.493	99	174.916	18	112.493	42	112.493	15	111.857	7	111.857	12	111.857	17	111.857	4
133.002	1	133.002	32	133.002	66	133.002	82	133.002	0	133.002	0	133.002	0	133.002	62	133.002	0	133.002	0	133.002	3	133.002	11	112.5	84	174.925	5	112.5	44	112.5	5	111.864	39	111.864	8	111.864	9	111.864	0
133.009	1	133.009	24	133.009	82	133.009	81	133.009	0	133.009	0	133.009	2	133.009	45	133.009	0	133.009	2	133.009	5	133.009	20	112.507	40	174.933	9	112.507	13	112.507	10	111.871	26	111.871	3	111.871	31	111.871	7
133.017	1	133.017	35	133.017	55	133.017	73	133.017	0	133.017	0	133.017	0	133.017	26	133.017	0	133.017	5	133.017	12	133.017	9	112.514	40	174.942	3	112.514	20	112.514	31	111.878	10	111.878	1	111.878	15	111.878	11
133.024	0	133.024	9	133.024	26	133.024	45	133.024	0	133.024	0	133.024	0	133.024	13	133.024	1	133.024	1	133.024	8	133.024	9	112.521	43	174.95	23	112.521	15	112.521	17	111.884	4	111.884	5	111.884	6	111.884	22
133.032	4	133.032	2	133.032	23	133.032	23	133.032	0	133.032	0	133.032	0	133.032	12	133.032	0	133.032	0	133.032	6	133.032	8	112.527	26	174.959	42	112.527	2	112.527	19	111.891	0	111.891	5	111.891	13	111.891	19
133.039	3	133.039	2	133.039	23	133.039	4	133.039	1	133.039	0	133.039	0	133.039	13	133.039	0	133.039	0	133.039	4	133.039	6	112.534	26	174.967	25	112.534	2	112.534	8	111.898	0	111.898	9	111.898	4	111.898	8
133.047	3	133.047	0	133.047	17	133.047	4	133.047	2	133.047	0	133.047	0	133.047	7	133.047	0	133.047	1	133.047	2	133.047	16	112.541	21	174.976	8	112.541	5	112.541	18	111.905	0	111.905	11	111.905	0	111.905	0
133.054	1	133.054	8	133.054	5	133.054	17	133.054	0	133.054	0	133.054	0	133.054	1	133.054	0	133.054	0	133.054	1	133.054	5	112.548	15	174.984	1	112.548	4	112.548	22	111.912	3	111.912	32	111.912	0	111.912	3
133.061	0	133.061	8	133.061	8	133.061	19	133.061	0	133.061	0	133.061	0	133.061	2	133.061	0	133.061	0	133.061	5	133.061	2	112.555	56	174.993	0	112.555	32	112.555	29	111.918	0	111.918	60	111.918	0	111.918	23
133.069	0	133.069	2	133.069	0	133.069	8	133.069	0	133.069	0	133.069	0	133.069	2	133.069	0	133.069	0	133.069	1	133.069	2	112.562	143	175.001	0	112.562	114	112.562	56	111.925	0	111.925	57	111.925	0	111.925	9
133.076	0	133.076	3	133.076	4	133.076	3	133.076	0	133.076	0	133.076	0	133.076	1	133.076	0	133.076	0	133.076	2	133.076	0	112.568	96	175.01	5	112.568	247	112.568	52	111.932	0	111.932	51	111.932	1	111.932	6
133.084	0	133.084	3	133.084	6	133.084	5	133.084	0	133.084	0	133.084	0	133.084	9	133.084	0	133.084	0	133.084	2	133.084	4	112.575	77	175.018	6	112.575	503	112.575	28	111.939	0	111.939	32	111.939	0	111.939	35
133.091	0	133.091	5	133.091	3	133.091	2	133.091	0	133.091	0	133.091	0	133.091	3	133.091	0	133.091	0	133.091	0	133.091	6	112.582	52	175.027	1	112.582	1144	112.582	34	111.945	28	111.945	28	111.945	0	111.945	12
133.098	0	133.098	2	133.098	15	133.098	2	133.098	0	133.098	0	133.098	0	133.098	0	133.098	0	133.098	0	133.098	0	133.098	6	112.589	79	175.035	7	112.589	1624	112.589	24	111.952	15	111.952	42	111.952	8	111.952	1
133.106	0	133.106	0	133.106	16	133.106	9	133.106	0	133.106	0	133.106	0	133.106	16	133.106	0	133.106	0	133.106	2	133.106	8	112.596	72	175.044	7	112.596	1856	112.596	44	111.959	4	111.959	47	111.959	8	111.959	30
133.113	0	133.113	8	133.113	4	133.113	6	133.113	0	133.113	0	133.113	0	133.113	3	133.113	0	133.113	0	133.113	0	133.113	0	112.603	62	175.052	0	112.603	2060	112.603	22	111.966	15	111.966	19	111.966	9	111.966	19
133.121	0	133.121	15	133.121	0	133.121	1	133.121	0	133.121	0	133.121	0	133.121	0	133.121	0	133.121	0	133.121	0	133.121	1	112.61	54	175.061	0	112.61	1965	112.61	21	111.973	9	111.973	11	111.973	29	111.973	8
133.128	0	133.128	5	133.128	6	133.128	4	133.128	0	133.128	0	133.128	0	133.128	1	133.128	0	133.128	0	133.128	3	133.128	0	112.616	56	175.069	0	112.616	1820	112.616	21	111.979	1	111.979	27	111.979	24	111.979	1
133.136	0	133.136	0	133.136	1	133.136	2	133.136	0	133.136	0	133.136	0	133.136	4	133.136	0	133.136	0	133.136	5	133.136	0	112.623	122	175.078	0	112.623	1758	112.623	26	111.986	2	111.986	32	111.986	11	111.986	1
133.143	0	133.143	5	133.143	0	133.143	0	133.143	0	133.143	0	133.143	0	133.143	4	133.143	0	133.143	0	133.143	0	133.143	0	112.63	120	175.086	0	112.63	1738	112.63	88	111.993	9	111.993	37	111.993	6	111.993	0
133.15	0	133.15	2	133.15	1	133.15	0	133.15	0	133.15	0	133.15	0	133.15	6	133.15	0	133.15	1	133.15	0	133.15	2	112.637	98	175.095	3	112.637	1465	112.637	80	112	8	112	18	112	8	112	0
133.158	0	133.158	3	133.158	3	133.158	1	133.158	0	133.158	0	133.158	0	133.158	6	133.158	0	133.158	0	133.158	0	133.158	3	112.644	81	175.103	0	112.644	1365	112.644	51	112.007	1	112.007	48	112.007	19	112.007	0
133.165	0	133.165	1	133.165	6	133.165	0	133.165	0	133.165	0	133.165	0	133.165	1	133.165	0	133.165	5	133.165	0	133.165	0	112.651	68	175.112	0	112.651	1119	112.651	97	112.013	0	112.013	22	112.013	9	112.013	0
133.173	0	133.173	2	133.173	7	133.173	1	133.173	0	133.173	0	133.173	0	133.173	2	133.173	0	133.173	0	133.173	7	133.173	0	112.657	61	175.12	9	112.657	911	112.657	141	112.02	0	112.02	10	112.02	5	112.02	3
133.18	0	133.18	7	133.18	2	133.18	2	133.18	0	133.18	0	133.18	0	133.18	3	133.18	0	133.18	0	133.18	4	133.18	0	112.664	59	175.129	4	112.664	584	112.664	178	112.027	0	112.027	7	112.027	2	112.027	1
133.188	0	133.188	11	133.188	3	133.188	0	133.188	0	133.188	0	133.188	0	133.188	2	133.188	0	133.188	0	133.188	5	133.188	1	112.671	65	175.137	0	112.671	368	112.671	219	112.034	0	112.034	35	112.034	1	112.034	15
133.195	0	133.195	16	133.195	0	133.195	4	133.195	0	133.195	0	133.195	0	133.195	0	133.195	0	133.195	0	133.195	5	133.195	4	112.678	59	175.146	0	112.678	295	112.678	196	112.04	0	112.04	27	112.04	0	112.04	3
133.202	0	133.202	2	133.202	0	133.202	4	133.202	0	133.202	0	133.202	0	133.202	3	133.202	0	133.202	0	133.202	0	133.202	0	112.685	47	175.154	3	112.685	194	112.685	242	112.047	0	112.047	18	112.047	0	112.047	9
133.21	0	133.21	1	133.21	1	133.21	1	133.21	0	133.21	0	133.21	0	133.21	1	133.21	0	133.21	0	133.21	0	133.21	1	112.692	36	175.162	0	112.692	151	112.692	270	112.054	3	112.054	37	112.054	7	112.054	6
133.217	0	133.217	3	133.217	5	133.217	2	133.217	0	133.217	0	133.217	0	133.217	2	133.217	0	133.217	0	133.217	10	133.217	1	112.699	86	175.171	17	112.699	143	112.699	224	112.061	6	112.061	17	112.061	12	112.061	3
133.225	0	133.225	0	133.225	3	133.225	2	133.225	0	133.225	0	133.225	0	133.225	0	133.225	0	133.225	0	133.225	10	133.225	6	112.705	81	175.179	20	112.705	149	112.705	263	112.068	18	112.068	12	112.068	1	112.068	10
133.232	0	133.232	2	133.232	1	133.232	16	133.232	0	133.232	0	133.232	0	133.232	0	133.232	0	133.232	0	133.232	0	133.232	1	112.712	73	175.188	20	112.712	139	112.712	217	112.074	8	112.074	23	112.074	1	112.074	8
133.24	0	133.24	0	133.24	2	133.24	10	133.24	0	133.24	0	133.24	0	133.24	0	133.24	0	133.24	0	133.24	1	133.24	4	112.719	75	175.196	59	112.719	113	112.719	124	112.081	7	112.081	20	112.081	0	112.081	0
133.247	0	133.247	0	133.247	4	133.247	2	133.247	0	133.247	0	133.247	0	133.247	1	133.247	0	133.247	0	133.247	0	133.247	0	112.726	92	175.205	52	112.726	145	112.726	160	112.088	0	112.088	31	112.088	0	112.088	0
133.254	0	133.254	0	133.254	0	133.254	0	133.254	0	133.254	0	133.254	0	133.254	0	133.254	0	133.254	0	133.254	5	133.254	1	112.733	93	175.213	77	112.733	100	112.733	96	112.095	0	112.095	29	112.095	2	112.095	10
133.262	0	133.262	5	133.262	0	133.262	2	133.262	0	133.262	0	133.262	0	133.262	0	133.262	0	133.262	0	133.262	2	133.262	1	112.74	71	175.222	55	112.74	68	112.74	44	112.102	0	112.102	27	112.102	28	112.102	20
133.269	0	133.269	7	133.269	11	133.269	9	133.269	0	133.269	0	133.269	0	133.269	5	133.269	0	133.269	0	133.269	2	133.269	1	112.746	83	175.23	39	112.746	91	112.746	45	112.108	0	112.108	17	112.108	32	112.108	12
133.277	0	133.277	3	133.277	3	133.277	3	133.277	0	133.277	0	133.277	0	133.277	2	133.277	0	133.277	0	133.277	4	133.277	0	112.753	70	175.239	21	112.753	78	112.753	5	112.115	16	112.115	11	112.115	25	112.115	0
133.284	4	133.284	0	133.284	3	133.284	3	133.284	0	133.284	0	133.284	0	133.284	1	133.284	0	133.284	0	133.284	6	133.284	7	112.76	77	175.247	27	112.76	94	112.76	5	112.122	22	112.122	15	112.122	19	112.122	2
133.292	0	133.292	0	133.292	0	133.292	0	133.292	0	133.292	0	133.292	0	133.292	1	133.292	0	133.292	0	133.292	0	133.292	1	112.767	103	175.256	10	112.767	126	112.767	4	112.129	14	112.129	9	112.129	13	112.129	29
133.299	0	133.299	0	133.299	0	133.299	1	133.299	0	133.299	0	133.299	0	133.299	1	133.299	0	133.299	0	133.299	1	133.299	0	112.774	76	175.264	2	112.774	117	112.774	3	112.136	15	112.136	6	112.136	22	112.136	35
133.307	0	133.307	0	133.307	0	133.307	3	133.307	0	133.307	0	133.307	0	133.307	4	133.307	0	133.307	0	133.307	7	133.307	0	112.781	57	175.273	30	112.781	115	112.781	37	112.142	28	112.142	9	112.142	16	112.142	38
133.314	0	133.314	0	133.314	4	133.314	7	133.314	0	133.314	0	133.314	0	133.314	0	133.314	0	133.314	0	133.314	0	133.314	1	112.788	44	175.281	58	112.788	181	112.788	38	112.149	76	112.149	20	112.149	6	112.149	90
133.321	0	133.321	0	133.321	4	133.321	10	133.321	0	133.321	0	133.321	0	133.321	1	133.321	0	133.321	0	133.321	1	133.321	13	112.794	37	175.29	51	112.794	140	112.794	8	112.156	190	112.156	32	112.156	10	112.156	100
133.329	0	133.329	0	133.329	0	133.329	0	133.329	0	133.329	0	133.329	4	133.329	3	133.329	1	133.329	0	133.329	0	133.329	6	112.801	40	175.298	56	112.801	95	112.801	3	112.163	413	112.163	52	112.163	4	112.163	174
133.336	0	133.336	4	133.336	4	133.336	0	133.336	0	133.336	0	133.336	2	133.336	3	133.336	0	133.336	0	133.336	5	133.336	0	112.808	40	175.307	71	112.808	162	112.808	21	112.17	565	112.17	51	112.17	9	112.17	230
133.344	0	133.344	2	133.344	1	133.344	0	133.344	0	133.344	0	133.344	0	133.344	3	133.344	0	133.344	0	133.344	0	133.344	1	112.815	58	175.315	109	112.815	102	112.815	41	112.176	497	112.176	111	112.176	12	112.176	317
133.351	0	133.351	7	133.351	0	133.351	0	133.351	0	133.351	0	133.351	0	133.351	0	133.351	0	133.351	0	133.351	0	133.351	0	112.822	46	175.324	120	112.822	59	112.822	42	112.183	400	112.183	167	112.183	19	112.183	506
133.359	0	133.359	8	133.359	0	133.359	7	133.359	0	133.359	0	133.359	0	133.359	2	133.359	1	133.359	0	133.359	1	133.359	0	112.829	34	175.332	72	112.829	47	112.829	10	112.19	349	112.19	180	112.19	13	112.19	529
133.366	0	133.366	3	133.366	0	133.366	13	133.366	0	133.366	0	133.366	0	133.366	2	133.366	1	133.366	0	133.366	2	133.366	6	112.835	28	175.341	31	112.835	82	112.835	8	112.197	282	112.197	296	112.197	14	112.197	662
133.373	0	133.373	0	133.373	0	133.373	6	133.373	0	133.373	0	133.373	0	133.373	5	133.373	0	133.373	0	133.373	1	133.373	5	112.842	61	175.349	12	112.842	65	112.842	18	112.204	293	112.204	287	112.204	30	112.204	585
133.381	2	133.381	1	133.381	0	133.381	0	133.381	0	133.381	0	133.381	11	133.381	2	133.381	0	133.381	0	133.381	0	133.381	0	112.849	117	175.358	53	112.849	83	112.849	27	112.21	302	112.21	185	112.21	19	112.21	485
133.388	0	133.388	0	133.388	0	133.388	5	133.388	0	133.388	0	133.388	6	133.388	2	133.388	0	133.388	0	133.388	10	133.388	3	112.856	152	175.366	33	112.856	82	112.856	20	112.217	279	112.217	151	112.217	17	112.217	426
133.396	0	133.396	3	133.396	0	133.396	1	133.396	0	133.396	0	133.396	0	133.396	0	133.396	0	133.396	0	133.396	4	133.396	3	112.863	133	175.375	19	112.863	60	112.863	73	112.224	273	112.224	182	112.224	33	112.224	413
133.403	0	133.403	1	133.403	7	133.403	6	133.403	0	133.403	0	133.403	0	133.403	5	133.403	0	133.403	0	133.403	10	133.403	0	112.87	82	175.383	28	112.87	78	112.87	40	112.231	295	112.231	124	112.231	23	112.231	327
133.411	0	133.411	4	133.411	14	133.411	0	133.411	0	133.411	0	133.411	0	133.411	0	133.411	0	133.411	0	133.411	6	133.411	2	112.877	69	175.392	6	112.877	107	112.877	13	112.238	201	112.238	58	112.238	11	112.238	331
133.418	0	133.418	1	133.418	12	133.418	0	133.418	0	133.418	0	133.418	0	133.418	0	133.418	0	133.418	0	133.418	4	133.418	6	112.883	50	175.4	1	112.883	102	112.883	8	112.244	103	112.244	82	112.244	19	112.244	322
133.425	0	133.425	9	133.425	1	133.425	0	133.425	0	133.425	0	133.425	0	133.425	0	133.425	0	133.425	0	133.425	0	133.425	0	112.89	42	175.409	38	112.89	61	112.89	10	112.251	73	112.251	57	112.251	10	112.251	305
133.433	0	133.433	2	133.433	0	133.433	2	133.433	0	133.433	0	133.433	0	133.433	1	133.433	0	133.433	0	133.433	0	133.433	0	112.897	30	175.417	23	112.897	27	112.897	39	112.258	39	112.258	25	112.258	10	112.258	291
133.44	0	133.44	9	133.44	6	133.44	2	133.44	0	133.44	0	133.44	0	133.44	5	133.44	0	133.44	0	133.44	2	133.44	2	112.904	20	175.426	6	112.904	32	112.904	20	112.265	17	112.265	29	112.265	21	112.265	276
133.448	0	133.448	3	133.448	0	133.448	2	133.448	0	133.448	0	133.448	0	133.448	0	133.448	0	133.448	0	133.448	2	133.448	3	112.911	71	175.434	3	112.911	34	112.911	7	112.272	30	112.272	23	112.272	10	112.272	239
133.455	0	133.455	1	133.455	0	133.455	0	133.455	0	133.455	0	133.455	0	133.455	1	133.455	0	133.455	0	133.455	3	133.455	0	112.918	98	175.443	12	112.918	43	112.918	7	112.278	35	112.278	25	112.278	4	112.278	154
133.463	0	133.463	0	133.463	3	133.463	3	133.463	0	133.463	0	133.463	0	133.463	6	133.463	0	133.463	0	133.463	6	133.463	4	112.925	81	175.451	12	112.925	38	112.925	0	112.285	14	112.285	13	112.285	4	112.285	147
133.47	0	133.47	0	133.47	0	133.47	4	133.47	0	133.47	0	133.47	0	133.47	2	133.47	0	133.47	0	133.47	8	133.47	5	112.931	62	175.46	3	112.931	27	112.931	0	112.292	11	112.292	21	112.292	12	112.292	140
133.477	0	133.477	0	133.477	3	133.477	0	133.477	0	133.477	0	133.477	0	133.477	0	133.477	0	133.477	0	133.477	6	133.477	2	112.938	112	175.468	1	112.938	8	112.938	0	112.299	21	112.299	36	112.299	33	112.299	179
133.485	0	133.485	0	133.485	0	133.485	0	133.485	0	133.485	0	133.485	0	133.485	0	133.485	0	133.485	0	133.485	8	133.485	7	112.945	120	175.477	17	112.945	2	112.945	13	112.306	34	112.306	28	112.306	24	112.306	166
133.492	0	133.492	0	133.492	1	133.492	2	133.492	0	133.492	0	133.492	0	133.492	5	133.492	0	133.492	0	133.492	4	133.492	1	112.952	92	175.485	5	112.952	7	112.952	9	112.312	16	112.312	51	112.312	8	112.312	159
133.5	0	133.5	0	133.5	0	133.5	0	133.5	0	133.5	0	133.5	0	133.5	1	133.5	0	133.5	0	133.5	9	133.5	0	112.959	69	175.494	1	112.959	1	112.959	15	112.319	0	112.319	63	112.319	1	112.319	158
133.507	0	133.507	0	133.507	0	133.507	8	133.507	0	133.507	0	133.507	0	133.507	0	133.507	0	133.507	0	133.507	1	133.507	0	112.966	85	175.502	8	112.966	19	112.966	6	112.326	0	112.326	20	112.326	0	112.326	137
133.515	0	133.515	0	133.515	0	133.515	0	133.515	0	133.515	0	133.515	0	133.515	8	133.515	0	133.515	0	133.515	0	133.515	0	112.973	99	175.511	9	112.973	8	112.973	21	112.333	3	112.333	14	112.333	0	112.333	162
133.522	0	133.522	0	133.522	0	133.522	12	133.522	0	133.522	0	133.522	0	133.522	0	133.522	0	133.522	0	133.522	1	133.522	3	112.979	82	175.519	1	112.979	5	112.979	23	112.34	6	112.34	28	112.34	0	112.34	113
133.53	0	133.53	3	133.53	4	133.53	4	133.53	0	133.53	0	133.53	0	133.53	0	133.53	0	133.53	0	133.53	4	133.53	0	112.986	64	175.528	0	112.986	5	112.986	19	112.346	0	112.346	18	112.346	14	112.346	96
133.537	0	133.537	5	133.537	1	133.537	1	133.537	0	133.537	0	133.537	0	133.537	0	133.537	0	133.537	0	133.537	5	133.537	0	112.993	48	175.536	0	112.993	5	112.993	26	112.353	0	112.353	35	112.353	23	112.353	117
133.544	0	133.544	1	133.544	0	133.544	8	133.544	0	133.544	0	133.544	0	133.544	0	133.544	0	133.544	0	133.544	5	133.544	2	113	57	175.545	0	113	20	113	20	112.36	0	112.36	28	112.36	25	112.36	77
133.552	0	133.552	0	133.552	0	133.552	11	133.552	0	133.552	0	133.552	0	133.552	5	133.552	0	133.552	0	133.552	2	133.552	1	113.007	75	175.553	3	113.007	29	113.007	14	112.367	0	112.367	12	112.367	13	112.367	66
133.559	0	133.559	1	133.559	1	133.559	1	133.559	0	133.559	0	133.559	0	133.559	5	133.559	0	133.559	0	133.559	4	133.559	0	113.014	37	175.562	1	113.014	15	113.014	17	112.374	0	112.374	17	112.374	13	112.374	71
133.567	0	133.567	3	133.567	0	133.567	0	133.567	0	133.567	0	133.567	0	133.567	3	133.567	0	133.567	0	133.567	7	133.567	0	113.02	37	175.571	3	113.02	23	113.02	22	112.38	0	112.38	37	112.38	18	112.38	46
133.574	0	133.574	17	133.574	1	133.574	1	133.574	0	133.574	0	133.574	0	133.574	8	133.574	0	133.574	0	133.574	1	133.574	0	113.027	55	175.579	20	113.027	42	113.027	19	112.387	21	112.387	38	112.387	12	112.387	20
133.582	0	133.582	16	133.582	3	133.582	0	133.582	0	133.582	0	133.582	0	133.582	19	133.582	0	133.582	0	133.582	5	133.582	0	113.034	56	175.588	9	113.034	50	113.034	6	112.394	12	112.394	15	112.394	5	112.394	7
133.589	0	133.589	10	133.589	1	133.589	3	133.589	0	133.589	0	133.589	0	133.589	10	133.589	0	133.589	0	133.589	0	133.589	0	113.041	66	175.596	3	113.041	14	113.041	3	112.401	12	112.401	30	112.401	3	112.401	5
133.597	0	133.597	17	133.597	0	133.597	1	133.597	0	133.597	0	133.597	0	133.597	10	133.597	0	133.597	0	133.597	1	133.597	4	113.048	48	175.605	1	113.048	4	113.048	7	112.408	5	112.408	18	112.408	2	112.408	1
133.604	0	133.604	20	133.604	1	133.604	3	133.604	0	133.604	0	133.604	0	133.604	7	133.604	0	133.604	0	133.604	0	133.604	0	113.055	112	175.613	0	113.055	9	113.055	13	112.414	0	112.414	8	112.414	1	112.414	0
133.611	0	133.611	6	133.611	0	133.611	0	133.611	0	133.611	0	133.611	0	133.611	1	133.611	0	133.611	0	133.611	0	133.611	1	113.062	109	175.622	0	113.062	3	113.062	5	112.421	0	112.421	34	112.421	2	112.421	0
133.619	0	133.619	2	133.619	0	133.619	0	133.619	0	133.619	0	133.619	0	133.619	3	133.619	0	133.619	0	133.619	5	133.619	2	113.068	67	175.63	4	113.068	3	113.068	30	112.428	9	112.428	41	112.428	0	112.428	34
133.626	0	133.626	0	133.626	0	133.626	1	133.626	0	133.626	0	133.626	0	133.626	1	133.626	0	133.626	0	133.626	3	133.626	0	113.075	60	175.639	1	113.075	11	113.075	14	112.435	7	112.435	19	112.435	1	112.435	29
133.634	0	133.634	0	133.634	0	133.634	0	133.634	0	133.634	0	133.634	0	133.634	5	133.634	0	133.634	0	133.634	3	133.634	0	113.082	53	175.647	0	113.082	15	113.082	10	112.442	1	112.442	12	112.442	0	112.442	6
133.641	0	133.641	1	133.641	1	133.641	2	133.641	0	133.641	0	133.641	0	133.641	4	133.641	0	133.641	0	133.641	0	133.641	1	113.089	47	175.656	0	113.089	14	113.089	3	112.448	1	112.448	4	112.448	1	112.448	19
133.649	0	133.649	1	133.649	0	133.649	0	133.649	0	133.649	0	133.649	0	133.649	1	133.649	0	133.649	0	133.649	0	133.649	1	113.096	74	175.664	0	113.096	5	113.096	6	112.455	0	112.455	2	112.455	1	112.455	28
133.656	0	133.656	0	133.656	1	133.656	0	133.656	0	133.656	0	133.656	0	133.656	3	133.656	0	133.656	0	133.656	1	133.656	6	113.103	73	175.673	22	113.103	2	113.103	24	112.462	0	112.462	27	112.462	0	112.462	35
133.663	0	133.663	0	133.663	1	133.663	0	133.663	0	133.663	0	133.663	0	133.663	1	133.663	0	133.663	0	133.663	0	133.663	10	113.11	71	175.681	17	113.11	15	113.11	14	112.469	2	112.469	31	112.469	0	112.469	18
133.671	0	133.671	0	133.671	0	133.671	1	133.671	0	133.671	0	133.671	0	133.671	1	133.671	0	133.671	0	133.671	1	133.671	3	113.116	53	175.69	3	113.116	60	113.116	3	112.476	12	112.476	14	112.476	5	112.476	15
133.678	0	133.678	2	133.678	0	133.678	1	133.678	0	133.678	0	133.678	0	133.678	0	133.678	0	133.678	0	133.678	1	133.678	1	113.123	53	175.698	1	113.123	45	113.123	0	112.482	19	112.482	25	112.482	7	112.482	2
133.686	0	133.686	1	133.686	0	133.686	0	133.686	0	133.686	0	133.686	0	133.686	3	133.686	0	133.686	0	133.686	0	133.686	2	113.13	57	175.707	0	113.13	31	113.13	14	112.489	7	112.489	27	112.489	3	112.489	35
133.693	0	133.693	1	133.693	0	133.693	0	133.693	0	133.693	0	133.693	0	133.693	6	133.693	0	133.693	0	133.693	6	133.693	0	113.137	84	175.715	0	113.137	24	113.137	11	112.496	0	112.496	43	112.496	0	112.496	25
133.701	0	133.701	0	133.701	0	133.701	0	133.701	0	133.701	0	133.701	0	133.701	0	133.701	0	133.701	0	133.701	10	133.701	7	113.144	87	175.724	0	113.144	35	113.144	2	112.503	3	112.503	25	112.503	7	112.503	18
133.708	0	133.708	0	133.708	0	133.708	0	133.708	0	133.708	0	133.708	0	133.708	4	133.708	0	133.708	0	133.708	0	133.708	8	113.151	95	175.732	0	113.151	45	113.151	7	112.51	8	112.51	21	112.51	17	112.51	33
133.716	0	133.716	0	133.716	0	133.716	0	133.716	0	133.716	0	133.716	0	133.716	0	133.716	0	133.716	0	133.716	0	133.716	5	113.158	103	175.741	0	113.158	26	113.158	4	112.516	1	112.516	11	112.516	17	112.516	35
133.723	0	133.723	0	133.723	0	133.723	1	133.723	0	133.723	0	133.723	0	133.723	0	133.723	0	133.723	0	133.723	2	133.723	8	113.165	93	175.749	0	113.165	14	113.165	19	112.523	0	112.523	12	112.523	18	112.523	17
133.73	0	133.73	0	133.73	1	133.73	2	133.73	0	133.73	0	133.73	0	133.73	7	133.73	0	133.73	0	133.73	2	133.73	4	113.171	114	175.758	0	113.171	7	113.171	28	112.53	6	112.53	40	112.53	12	112.53	6
133.738	0	133.738	7	133.738	4	133.738	1	133.738	0	133.738	0	133.738	0	133.738	14	133.738	0	133.738	0	133.738	0	133.738	0	113.178	83	175.766	5	113.178	2	113.178	65	112.537	20	112.537	29	112.537	13	112.537	13
133.745	0	133.745	3	133.745	0	133.745	4	133.745	0	133.745	0	133.745	0	133.745	10	133.745	0	133.745	0	133.745	1	133.745	2	113.185	78	175.775	1	113.185	3	113.185	43	112.544	10	112.544	27	112.544	8	112.544	28
133.753	0	133.753	0	133.753	0	133.753	4	133.753	0	133.753	0	133.753	0	133.753	5	133.753	0	133.753	0	133.753	0	133.753	6	113.192	73	175.783	0	113.192	8	113.192	30	112.55	6	112.55	29	112.55	4	112.55	38
133.76	0	133.76	0	133.76	0	133.76	6	133.76	0	133.76	0	133.76	0	133.76	23	133.76	0	133.76	0	133.76	3	133.76	5	113.199	75	175.792	0	113.199	39	113.199	17	112.557	0	112.557	8	112.557	1	112.557	29
133.768	0	133.768	0	133.768	0	133.768	0	133.768	0	133.768	0	133.768	0	133.768	16	133.768	0	133.768	0	133.768	0	133.768	4	113.206	67	175.8	0	113.206	46	113.206	22	112.564	0	112.564	16	112.564	0	112.564	7
133.775	0	133.775	4	133.775	3	133.775	0	133.775	0	133.775	0	133.775	0	133.775	35	133.775	0	133.775	0	133.775	1	133.775	6	113.213	69	175.809	3	113.213	21	113.213	19	112.571	0	112.571	51	112.571	1	112.571	0
133.783	0	133.783	1	133.783	3	133.783	0	133.783	0	133.783	0	133.783	0	133.783	28	133.783	0	133.783	0	133.783	1	133.783	11	113.219	62	175.817	0	113.219	5	113.219	12	112.578	0	112.578	54	112.578	5	112.578	2
133.79	0	133.79	0	133.79	0	133.79	0	133.79	0	133.79	0	133.79	0	133.79	35	133.79	0	133.79	0	133.79	6	133.79	14	113.226	56	175.826	0	113.226	17	113.226	4	112.584	0	112.584	58	112.584	11	112.584	0
133.797	0	133.797	10	133.797	2	133.797	0	133.797	0	133.797	0	133.797	0	133.797	46	133.797	0	133.797	0	133.797	12	133.797	8	113.233	70	175.834	0	113.233	17	113.233	12	112.591	0	112.591	38	112.591	30	112.591	49
133.805	0	133.805	2	133.805	3	133.805	0	133.805	0	133.805	0	133.805	0	133.805	37	133.805	0	133.805	0	133.805	6	133.805	4	113.24	75	175.843	0	113.24	5	113.24	35	112.598	0	112.598	48	112.598	46	112.598	52
133.812	1	133.812	5	133.812	2	133.812	0	133.812	0	133.812	0	133.812	0	133.812	54	133.812	0	133.812	0	133.812	1	133.812	1	113.247	47	175.851	0	113.247	0	113.247	39	112.605	4	112.605	40	112.605	33	112.605	19
133.82	0	133.82	10	133.82	4	133.82	8	133.82	0	133.82	0	133.82	0	133.82	54	133.82	0	133.82	0	133.82	2	133.82	9	113.254	43	175.86	2	113.254	8	113.254	17	112.612	1	112.612	27	112.612	30	112.612	17
133.827	0	133.827	6	133.827	2	133.827	1	133.827	0	133.827	0	133.827	0	133.827	69	133.827	3	133.827	0	133.827	6	133.827	19	113.261	40	175.868	0	113.261	19	113.261	27	112.618	5	112.618	17	112.618	23	112.618	17
133.835	0	133.835	8	133.835	4	133.835	2	133.835	0	133.835	0	133.835	0	133.835	84	133.835	0	133.835	0	133.835	13	133.835	19	113.267	39	175.877	0	113.267	25	113.267	13	112.625	14	112.625	21	112.625	18	112.625	5
133.842	2	133.842	2	133.842	6	133.842	3	133.842	0	133.842	0	133.842	0	133.842	68	133.842	0	133.842	0	133.842	11	133.842	6	113.274	40	175.885	0	113.274	24	113.274	15	112.632	2	112.632	27	112.632	12	112.632	7
133.85	2	133.85	0	133.85	3	133.85	12	133.85	0	133.85	0	133.85	0	133.85	67	133.85	0	133.85	0	133.85	15	133.85	7	113.281	52	175.894	0	113.281	8	113.281	10	112.639	0	112.639	19	112.639	6	112.639	1
133.857	5	133.857	0	133.857	0	133.857	6	133.857	0	133.857	1	133.857	0	133.857	66	133.857	0	133.857	0	133.857	11	133.857	4	113.288	43	175.902	0	113.288	33	113.288	1	112.646	0	112.646	3	112.646	4	112.646	5
133.864	3	133.864	0	133.864	6	133.864	3	133.864	0	133.864	0	133.864	0	133.864	33	133.864	0	133.864	0	133.864	14	133.864	1	113.295	34	175.911	0	113.295	25	113.295	16	112.653	0	112.653	39	112.653	2	112.653	1
133.872	5	133.872	1	133.872	10	133.872	3	133.872	0	133.872	0	133.872	0	133.872	18	133.872	0	133.872	0	133.872	5	133.872	6	113.302	60	175.919	5	113.302	12	113.302	21	112.659	1	112.659	50	112.659	4	112.659	0
133.879	2	133.879	0	133.879	8	133.879	16	133.879	0	133.879	3	133.879	0	133.879	14	133.879	3	133.879	0	133.879	14	133.879	6	113.309	62	175.928	2	113.309	19	113.309	34	112.666	11	112.666	42	112.666	19	112.666	0
133.887	0	133.887	1	133.887	6	133.887	6	133.887	0	133.887	0	133.887	2	133.887	33	133.887	0	133.887	0	133.887	6	133.887	4	113.315	65	175.936	0	113.315	19	113.315	14	112.673	3	112.673	24	112.673	13	112.673	9
133.894	1	133.894	0	133.894	1	133.894	14	133.894	0	133.894	0	133.894	2	133.894	43	133.894	0	133.894	0	133.894	1	133.894	6	113.322	88	175.945	19	113.322	8	113.322	21	112.68	0	112.68	19	112.68	28	112.68	11
133.902	3	133.902	0	133.902	4	133.902	7	133.902	0	133.902	0	133.902	2	133.902	27	133.902	0	133.902	2	133.902	1	133.902	4	113.329	96	175.953	8	113.329	4	113.329	19	112.687	0	112.687	6	112.687	42	112.687	18
133.909	1	133.909	5	133.909	0	133.909	14	133.909	1	133.909	0	133.909	0	133.909	31	133.909	0	133.909	2	133.909	1	133.909	0	113.336	61	175.962	1	113.336	1	113.336	15	112.693	4	112.693	5	112.693	36	112.693	5
[truncated: 186,083 more rows]
