# Supplementary material for: Elaborate plumage patterning in a Cretaceous bird
Source: PeerJ. 2018 Nov 2;6:e5831. doi: 10.7717/peerj.5831 (PMC6216952; doi:10.7717/peerj.5831)
Supplement: Supplemental Information 5 — Summary of peak locations and values in the Tof-Sims data. [file peerj-06-5831-s005.xlsx]

## Sheet: Sheet1
Ion	Theoretical Mass	Chicken				Turkey				Crow				Confuciusornis K1				Confuciusornis O				Confuciusornis P				Confuciusornis Y				Confuciusornis Matrix
		Observed Mass	Observed Intensity	Relative Intensity	Standardized Relative Intensity	Observed Mass	Observed Intensity	Relative Intensity	Standardized Relative Intensity	Observed Mass	Observed Intensity	Relative Intensity	Standardized Relative Intensity	Observed Mass	Observed Intensity	Relative Intensity	Standardized Relative Intensity	Observed Mass	Observed Intensity	Relative Intensity	Standardized Relative Intensity	Observed Mass	Observed Intensity	Relative Intensity	Standardized Relative Intensity	Observed Mass	Observed Intensity	Relative Intensity	Standardized Relative Intensity	Observed Mass	Observed Intensity	Relative Intensity	Standardized Relative Intensity
C4	48	47.9972	5092	0.470653	2.23255	48.0024	81	0.00748683	-0.759009	48.0038	994	0.0918754	-0.213949	47.9983	317	0.0293003	-0.618117	47.9994	2341	0.216379	0.590208	48.0013	971	0.0897495	-0.22768	47.9942	900	0.083187	-0.270067	48.0011	123	0.0113689	-0.733935
C4H	49.008	49.0069	10298	0.469435	2.26557	49.0164	103	0.00469526	-0.791322	49.001	2492	0.113598	-0.0749982	49.0095	652	0.0297215	-0.626709	49.0085	3940	0.179605	0.359174	49.0079	2619	0.119387	-0.0369181	49.0055	1709	0.0779049	-0.309775	49.0096	124	0.00565255	-0.785026
C3N	50.003	50.0039	21731	0.710628	2.36435	50.0178	205	0.00670373	-0.477597	50.0084	6714	0.219555	0.381748	50.0063	168	0.00549379	-0.482482	50.005	689	0.0225311	-0.413697	50.0059	752	0.0245912	-0.40538	50.0084	245	0.00801177	-0.472316	50.0119	76	0.00248528	-0.494628
C4HO	65.003	65.0097	5045	0.689208	2.39407	65.0109	15	0.00204918	-0.521711	65.0041	1349	0.18429	0.251581	65.0081	89	0.0121585	-0.478815	65.0054	248	0.0338798	-0.386646	65.0057	402	0.054918	-0.297375	65.0017	162	0.0221311	-0.436498	64.9976	10	0.00136612	-0.524609
C3NO	65.998	65.9989	11547	0.731981	2.36531	66.0106	61	0.00386688	-0.472037	65.9909	3510	0.222504	0.379958	65.998	58	0.0036767	-0.472778	65.9978	127	0.00805071	-0.455733	66.0025	370	0.0234548	-0.395706	65.996	54	0.00342314	-0.473766	65.998	48	0.00304279	-0.475249
C6	72	71.9964	2433	0.543566	2.31981	72.0065	26	0.00580876	-0.660592	71.9943	742	0.165773	0.225976	71.9973	78	0.0174263	-0.596204	72.0014	676	0.151028	0.144253	72.0032	321	0.0717158	-0.295316	71.9957	181	0.0404379	-0.468667	72.0081	19	0.00424486	-0.669259
C6H	73.008	73.0039	5321	0.541522	2.3337	73.0151	47	0.00478323	-0.673552	72.9977	1616	0.164462	0.221096	73.0063	204	0.0207612	-0.584031	73.0101	1281	0.130368	0.0300782	73.0089	894	0.0909831	-0.19059	73.0012	435	0.0442703	-0.452314	73.0081	28	0.00284958	-0.684386
C5N	74.003	74.0004	9141	0.702992	2.34701	74.0255	130	0.00999769	-0.466982	73.9945	3031	0.2331	0.438954	74.0022	61	0.00469123	-0.488529	174.008	252	0.0193801	-0.428883	74.0037	274	0.0210721	-0.422013	74.0033	98	0.00753672	-0.476975	73.9998	16	0.00123049	-0.502582
C7	84	83.9956	1835	0.630584	2.37626	84.0022	21	0.00721649	-0.553587	84.0019	521	0.179038	0.25398	83.9944	38	0.0130584	-0.526129	83.9992	271	0.0931271	-0.149804	83.9977	156	0.0536082	-0.335544	84.0034	59	0.0202749	-0.492212	84.0005	9	0.00309278	-0.572968
C7H	85.008	85.0035	1201	0.524454	2.28621	85.0087	9	0.00393013	-0.692925	84.9674	478	0.208734	0.479236	85.0056	60	0.0262009	-0.565462	85.0063	196	0.0855895	-0.22556	85.0098	228	0.0995633	-0.145583	85.0039	105	0.0458515	-0.452994	85.0037	13	0.00567686	-0.682928
C6N	86.003	86.0035	1865	0.624163	2.32748	86.0074	12	0.00401606	-0.56412	85.9937	675	0.225904	0.47049	86.001	44	0.0147256	-0.514184	86.0134	171	0.0572289	-0.316001	86.0081	143	0.0478581	-0.359695	86.0049	70	0.023427	-0.473611	86.0025	8	0.00267738	-0.570362
C6HN	87.011	87.0065	2041	0.6879	2.36464	87.0058	7	0.00235929	-0.515191	86.9931	638	0.215032	0.378208	87.0132	42	0.0141557	-0.465636	87.0103	56	0.0188743	-0.445815	87.005	100	0.0337041	-0.383517	87.0083	66	0.0222447	-0.431656	87.0099	17	0.00572969	-0.501033
C6H2N	88.019	88.0148	2301	0.722676	2.36563	88.0162	15	0.00471106	-0.47611	88.001	704	0.221106	0.380391	88.0202	19	0.00596734	-0.471138	88.0241	42	0.013191	-0.442546	88.0122	59	0.0185302	-0.421413	88.0181	26	0.00816583	-0.462436	88.0232	18	0.00565327	-0.472381
C2H3NO3	89.011	89.0097	2683	0.704384	2.36523	89.0182	17	0.00446311	-0.49207	88.9953	827	0.217117	0.376053	89.0082	36	0.0094513	-0.471707	88.999	58	0.0152271	-0.448128	89.0089	136	0.0357049	-0.364531	89.0085	40	0.0105014	-0.46742	89.0117	12	0.00315043	-0.497429
C5NO	89.998	89.9959	2700	0.723473	2.34439	89.992	10	0.00267953	-0.479164	89.9895	894	0.23955	0.448724	89.9905	20	0.00535906	-0.468667	89.9877	18	0.00482315	-0.470767	90	63	0.016881	-0.423533	89.9987	19	0.0050911	-0.469717	90.0002	8	0.00214362	-0.481263
C8	96	95.9895	1602	0.645187	2.4061	96.001	29	0.0116794	-0.52416	96.0009	368	0.148208	0.107347	95.9972	27	0.0108739	-0.527885	95.999	245	0.098671	-0.121784	95.9971	147	0.0592026	-0.304343	95.996	51	0.0205397	-0.483177	96.0021	14	0.00563834	-0.552102
C8H	97.008	96.954	14900	0.803494	2.44471	97.0033	93	0.0050151	-0.432322	96.9346	2442	0.131687	0.0240934	97.0058	98	0.00528473	-0.43135	97.0111	485	0.026154	-0.356155	97.0058	404	0.021786	-0.371894	97.0125	93	0.0050151	-0.432322	97.0083	29	0.00156385	-0.444757
C7N	98.003	97.9951	4096	0.698857	2.33219	98.0079	37	0.00631292	-0.482351	97.9867	1430	0.243986	0.483565	97.9992	26	0.0044361	-0.489979	98.005	114	0.0194506	-0.428959	98.008	120	0.0204743	-0.424799	98.0048	31	0.0052892	-0.486512	98.0022	7	0.00119434	-0.503154
C9	108	107.984	1239	0.723715	2.43282	108.003	14	0.00817757	-0.474697	108.002	239	0.139603	0.0593371	107.995	15	0.00876168	-0.472323	107.997	98	0.057243	-0.275324	107.998	78	0.0455607	-0.322794	108.004	24	0.0140187	-0.450962	107.999	5	0.00292056	-0.496058
C9H	109.008	108.992	1385	0.713182	2.43609	109.01	21	0.0108136	-0.472928	109.008	257	0.132338	0.0303911	109.003	28	0.0144181	-0.457999	109.008	108	0.0556128	-0.287382	109.012	112	0.0576725	-0.278852	109.016	26	0.0133883	-0.462265	109.008	5	0.00257467	-0.507051
C8N	110.003	110.005	1154	0.66513	2.35044	110.018	17	0.00979827	-0.501315	109.993	384	0.221326	0.419173	110.001	20	0.0115274	-0.49379	110.008	68	0.0391931	-0.3734	110.005	63	0.0363112	-0.38594	110.002	23	0.0132565	-0.486266	110.006	6	0.00345821	-0.528904
C8HN	111.011	111.009	1530	0.740561	2.40734	111.006	8	0.00387222	-0.473708	111.008	373	0.180542	0.217215	111.009	25	0.0121007	-0.441528	111.017	48	0.0232333	-0.39799	111.013	62	0.0300097	-0.371489	111.012	14	0.00677638	-0.46235	111.015	6	0.00290416	-0.477494
C8H2N	112.019	112.009	1616	0.749189	2.38927	112.008	9	0.00417246	-0.462504	112.005	436	0.202133	0.295249	112.016	12	0.00556328	-0.457181	112.02	19	0.00880853	-0.444758	112.013	45	0.0208623	-0.398619	112.022	12	0.00556328	-0.457181	112.019	8	0.00370885	-0.464279
C4H3NO3	113.011	113.01	1605	0.887721	2.47177	113.011	9	0.00497788	-0.388959	113.092	88	0.0486726	-0.247356	113.011	15	0.00829646	-0.378204	113.012	17	0.00940265	-0.374619	113.011	51	0.028208	-0.313676	113.016	20	0.0110619	-0.369242	113.011	3	0.00165929	-0.399713
C7NO	113.998	113.999	1000	0.710227	2.35699	113.993	14	0.00994318	-0.46339	113.995	318	0.225852	0.406181	113.989	16	0.0113636	-0.457669	114.008	11	0.0078125	-0.471971	113.997	40	0.0284091	-0.389019	114.006	5	0.00355114	-0.489134	114.002	4	0.00284091	-0.491994
C10	120	119.996	515	0.572222	2.40883	120.004	10	0.0111111	-0.613428	119.991	127	0.141111	0.0867777	119.998	32	0.0355556	-0.481766	119.997	65	0.0722222	-0.284272	119.999	86	0.0955556	-0.158594	119.999	48	0.0533333	-0.386011	120.005	17	0.0188889	-0.571536
C10H	121.008	120.996	1286	0.56752	2.36242	121.01	15	0.00661959	-0.631981	120.989	404	0.178288	0.28448	121.012	68	0.0300088	-0.507116	121.007	198	0.0873786	-0.200844	121.005	183	0.080759	-0.236183	121.004	89	0.0392763	-0.457641	121.004	23	0.01015	-0.613133
C9N	122.003	121.993	1949	0.762818	2.42025	122.013	39	0.0152642	-0.416401	122.004	429	0.167906	0.16281	121.995	16	0.00626223	-0.45056	122.002	44	0.0172211	-0.408975	122.003	54	0.021135	-0.394124	122	17	0.00665362	-0.449075	122.003	7	0.00273973	-0.463926
C11	132	131.983	613	0.744836	2.45013	132.006	12	0.0145808	-0.436472	131.999	96	0.116646	-0.0330206	131.992	11	0.0133657	-0.441275	131.998	34	0.0413123	-0.330806	132.003	39	0.0473876	-0.306791	132.001	12	0.0145808	-0.436472	132.004	6	0.0072904	-0.46529
C11H	133.008	132.986	958	0.723565	2.44532	133.02	20	0.0151057	-0.448951	132.998	166	0.125378	0.00154279	133.005	25	0.0188822	-0.433523	133.006	57	0.0430514	-0.334785	133.011	63	0.0475831	-0.316272	133.007	27	0.0203927	-0.427352	133.007	8	0.0060423	-0.485978
C10N	134.003	133.958	2540	0.815409	2.44218	134.006	22	0.0070626	-0.41718	133.964	430	0.138042	0.0461325	134.004	21	0.00674157	-0.418315	134.007	36	0.011557	-0.401282	134.002	49	0.0157303	-0.386519	134.003	12	0.00385233	-0.428535	134.007	5	0.00160514	-0.436484
C10HN	135.011	134.997	900	0.657895	2.3494	135.009	11	0.00804094	-0.515644	134.98	300	0.219298	0.415738	134.994	21	0.0153509	-0.483416	135.01	27	0.0197368	-0.46408	135.007	77	0.0562865	-0.302941	135.006	25	0.0182749	-0.470525	135.01	7	0.00511696	-0.528535
C10H2N	136.019	135.998	930	0.716487	2.42256	136.009	12	0.00924499	-0.4741	136.007	207	0.159476	0.141204	136.015	19	0.0146379	-0.452012	136.022	15	0.0115562	-0.464634	136.002	60	0.046225	-0.32264	136.006	33	0.0254237	-0.407836	136.017	22	0.0169492	-0.442546
C6H3NO3	137.011	137.013	894	0.588933	2.4053	137.013	10	0.00658762	-0.613919	137.011	199	0.131094	0.0315925	137.015	53	0.0349144	-0.467057	137.01	19	0.0125165	-0.583181	137.017	149	0.0981555	-0.139178	137.002	147	0.0968379	-0.146009	137.018	47	0.0309618	-0.487549
C9NO	137.998	137.993	590	0.695755	2.4062	137.996	7	0.00825472	-0.492176	137.998	147	0.173349	0.203831	138.004	13	0.0153302	-0.462347	137.999	6	0.00707547	-0.497148	138.002	49	0.057783	-0.283374	137.998	25	0.0294811	-0.40269	138.002	11	0.0129717	-0.47229
C12	144	143.996	260	0.589569	2.337	144.004	8	0.0181406	-0.537554	143.984	93	0.210884	0.432039	144.007	12	0.0272109	-0.491926	144.006	25	0.0566893	-0.343635	144.006	30	0.0680272	-0.2866	143.999	11	0.0249433	-0.503333	144.002	2	0.00453515	-0.605996
C12H	145.008	144.99	716	0.656881	2.42658	145.011	14	0.012844	-0.511685	145.003	140	0.12844	0.0156959	145.004	20	0.0183486	-0.486572	145.006	95	0.087156	-0.172654	145.012	75	0.0688073	-0.256366	145.003	23	0.0211009	-0.474015	145.007	7	0.00642202	-0.540984
C11N	146.003	145.988	800	0.768492	2.44003	146.011	9	0.00864553	-0.441199	146.007	144	0.138329	0.0505399	145.999	11	0.0105668	-0.433914	145.998	21	0.0201729	-0.397489	145.997	39	0.037464	-0.331924	145.996	10	0.00960615	-0.437557	146.004	7	0.0067243	-0.448485
